# Supplementary material
Source: PubMed Central journal article supplement (PMC6491061)
Supplement: AnnalsATS.201809-594OC_thayer_data_supplement.pdf [file AnnalsATS.201809-594OC_thayer_data_supplement.pdf]

## **Online Data Supplement**

### **Unbiased Phenome-wide Association Studies of Red Cell Distribution Width Identifies Key Associations with Pulmonary Hypertension**

Timothy E. Thayer, Shi Huang, Rebecca T. Levinson, Eric Farber-Eger, Tufik R. Assad, Jessica H. Huston, Jonathan D. Mosley, Quinn S. Wells, Evan L. Brittain

**Figure E1**

**Discovery Cohort RDW PheWAS  
Negative Associations**

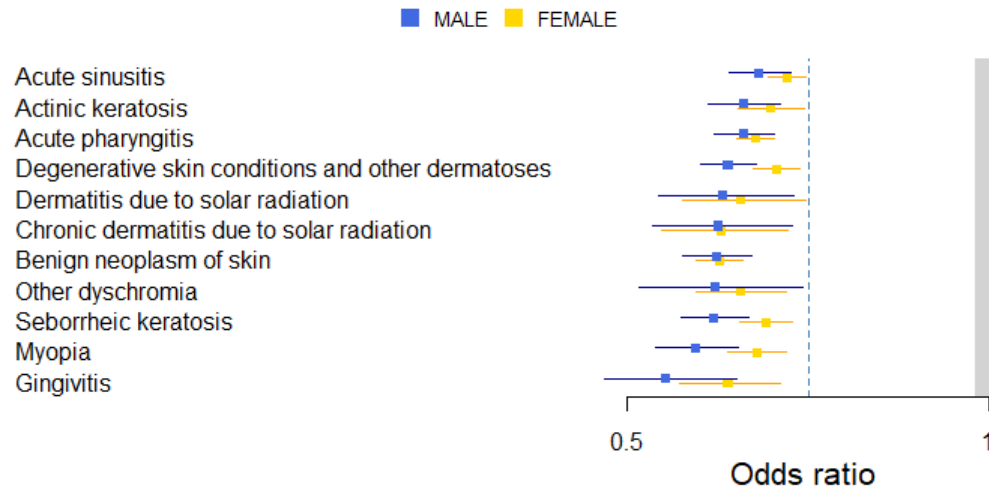

**Supplemental Table E1**

| phecode | description   | lower 95% | upper 95% | OR       | p         | n_total | n_cases | n_controls | note |
|---------|---------------|-----------|-----------|----------|-----------|---------|---------|------------|------|
| 428.1   | Congestive    | 1.81709   | 2.007486  | 1.909682 | 6.34E-143 | 45639   | 1220    | 44419      |      |
| 428     | Congestive    | 1.697493  | 1.85797   | 1.775795 | 4.08E-137 | 46138   | 1719    | 44419      |      |
| 509     | Respiratory   | 1.670763  | 1.858591  | 1.762304 | 1.31E-96  | 44768   | 967     | 43801      |      |
| 415.2   | Chronic pul   | 1.88445   | 2.152669  | 2.013618 | 1.36E-94  | 46223   | 368     | 45855      |      |
| 415     | Pulmonary     | 1.685688  | 1.892535  | 1.786152 | 4.66E-86  | 46502   | 647     | 45855      |      |
| 509.1   | Respiratory   | 1.754272  | 1.988812  | 1.868089 | 5.45E-85  | 44336   | 535     | 43801      |      |
| 318     | Tobacco us    | 1.347506  | 1.442446  | 1.39418  | 1.28E-81  | 44190   | 4636    | 39554      |      |
| 496     | Chronic air   | 1.440548  | 1.573238  | 1.505595 | 4.08E-74  | 44880   | 1870    | 43010      |      |
| 317     | Alcohol-rel   | 1.414364  | 1.53827   | 1.47512  | 1.27E-73  | 42088   | 2534    | 39554      |      |
| 465     | Acute uppe    | 0.638978  | 0.6988    | 0.668376 | 1.08E-69  | 42183   | 5231    | 36952      |      |
| 278.11  | Morbid obe    | 1.485991  | 1.644086  | 1.563397 | 2.46E-67  | 43949   | 1163    | 42786      |      |
| 416     | Cardiomeg     | 1.470543  | 1.630641  | 1.54889  | 6.18E-62  | 46998   | 1143    | 45855      |      |
| 208     | Benign neo    | 0.626607  | 0.692127  | 0.65875  | 8.12E-61  | 47298   | 4123    | 43175      |      |
| 316     | Substance     | 1.380527  | 1.506543  | 1.442349 | 9.54E-61  | 42069   | 2515    | 39554      |      |
| 200     | Myeloprolif   | 1.650826  | 1.900945  | 1.772525 | 3.54E-57  | 47433   | 300     | 47133      |      |
| 317.1   | Alcoholism    | 1.393851  | 1.530959  | 1.461047 | 1.44E-56  | 41385   | 1831    | 39554      |      |
| 428.3   | Heart failur  | 1.579388  | 1.798653  | 1.686074 | 5.49E-56  | 45004   | 585     | 44419      |      |
| 745     | Pain in joint | 0.762976  | 0.810114  | 0.786291 | 1.08E-55  | 44888   | 11444   | 33444      |      |
| 278.1   | Obesity       | 1.297066  | 1.397098  | 1.346305 | 1.61E-55  | 46011   | 3225    | 42786      |      |
| 508     | Pulmonary     | 1.342017  | 1.460774  | 1.400384 | 1.09E-54  | 46176   | 2375    | 43801      |      |
| 476     | Allergic rhir | 0.650151  | 0.716183  | 0.682563 | 5.07E-54  | 41531   | 4257    | 37274      |      |
| 200.1   | Polycyther    | 1.748563  | 2.059677  | 1.898881 | 2.05E-53  | 45116   | 204     | 44912      |      |
| 272.13  | Mixed hype    | 0.670239  | 0.733948  | 0.701562 | 7.50E-53  | 36659   | 4902    | 31757      |      |
| 289.8   | Polycyther    | 1.615326  | 1.869508  | 1.738802 | 5.49E-50  | 43974   | 331     | 43643      |      |
| 585.1   | Acute renal   | 1.516932  | 1.72258   | 1.617377 | 7.44E-50  | 45141   | 497     | 44644      |      |
| 585     | Renal failur  | 1.36157   | 1.499092  | 1.429162 | 5.14E-48  | 46018   | 1374    | 44644      |      |
| 425     | Cardiomyo     | 1.409944  | 1.569798  | 1.488479 | 7.81E-48  | 47848   | 993     | 46855      |      |
| 272     | Disorders o   | 0.782625  | 0.829565  | 0.805834 | 8.02E-48  | 45950   | 14193   | 31757      |      |
| 702     | Degenerati    | 0.601724  | 0.679164  | 0.639554 | 1.81E-47  | 45601   | 2835    | 42766      |      |
| 272.1   | Hyperlipide   | 0.782616  | 0.829739  | 0.805915 | 1.97E-47  | 45792   | 14035   | 31757      |      |
| 272.11  | Hyperchole    | 0.683697  | 0.750302  | 0.716435 | 6.50E-45  | 36395   | 4638    | 31757      |      |

|                       |          |          |          |          |       |      |       |
|-----------------------|----------|----------|----------|----------|-------|------|-------|
| 427.2 Atrial fibrill  | 1.31435  | 1.436785 | 1.374455 | 1.49E-44 | 41084 | 2309 | 38775 |
| 415.21 Primary pul    | 1.85259  | 2.266188 | 2.050365 | 1.59E-44 | 45956 | 101  | 45855 |
| 427.21 Atrial fibrill | 1.309351 | 1.43385  | 1.370464 | 3.69E-42 | 40979 | 2204 | 38775 |
| 278 Overweight        | 1.22981  | 1.319594 | 1.274089 | 2.04E-41 | 46761 | 3975 | 42786 |
| 428.2 Heart failur    | 1.546698 | 1.797657 | 1.668934 | 9.09E-41 | 44812 | 393  | 44419 |
| 507 Pleurisy; pl      | 1.466521 | 1.67405  | 1.568041 | 1.39E-40 | 44429 | 628  | 43801 |
| 425.1 Primary/int     | 1.377121 | 1.54632  | 1.46036  | 1.22E-37 | 47711 | 856  | 46855 |
| 465.2 Acute phan      | 0.609188 | 0.694684 | 0.650833 | 1.29E-37 | 39340 | 2388 | 36952 |
| 571.51 Cirrhosis of   | 1.428663 | 1.628779 | 1.52689  | 7.61E-37 | 42442 | 544  | 41898 |
| 512.9 Other dyspi     | 1.26338  | 1.376457 | 1.31893  | 9.16E-37 | 35455 | 2419 | 33036 |
| 726 Peripheral c      | 0.681321 | 0.755502 | 0.71771  | 2.70E-36 | 43503 | 3487 | 40016 |
| 702.2 Seborrheic      | 0.573444 | 0.667146 | 0.618932 | 1.92E-35 | 45957 | 1762 | 44195 |
| 411.2 Myocardial      | 1.306039 | 1.444213 | 1.3739   | 3.00E-35 | 42667 | 1637 | 41030 |
| 464 Acute sinus       | 0.633005 | 0.717168 | 0.674089 | 3.21E-35 | 39426 | 2474 | 36952 |
| 496.21 Obstructive    | 1.471811 | 1.70507  | 1.586268 | 7.43E-35 | 43383 | 373  | 43010 |
| 411 Ischemic He       | 1.191919 | 1.275248 | 1.232948 | 5.79E-34 | 46929 | 5899 | 41030 |
| 216 Benign neo        | 0.568932 | 0.665589 | 0.615764 | 9.13E-34 | 46137 | 1681 | 44456 |
| 286.2 Encounter f     | 1.319234 | 1.472652 | 1.394606 | 1.89E-32 | 46460 | 1210 | 45250 |
| 496.2 Chronic bro     | 1.412468 | 1.623925 | 1.516447 | 1.01E-31 | 43487 | 477  | 43010 |
| 513 Respiratory       | 1.404012 | 1.611907 | 1.506549 | 1.87E-31 | 47983 | 457  | 47526 |
| 714.1 Rheumatoi       | 1.363802 | 1.551353 | 1.456381 | 2.10E-30 | 45203 | 588  | 44615 |
| 571.8 Liver absce     | 1.465231 | 1.721297 | 1.591199 | 7.98E-30 | 42160 | 262  | 41898 |
| 562.1 Diverticulo     | 0.682748 | 0.764237 | 0.722657 | 1.44E-29 | 43881 | 2924 | 40957 |
| 513.3 Hypoventil      | 1.549955 | 1.868484 | 1.705799 | 1.79E-29 | 47660 | 134  | 47526 |
| 287.3 Thrombocy       | 1.396001 | 1.609233 | 1.500882 | 2.95E-29 | 45741 | 491  | 45250 |
| 714 Rheumatoi         | 1.31389  | 1.476266 | 1.394102 | 4.34E-29 | 45483 | 868  | 44615 |
| 367 Disorders o       | 0.606379 | 0.704316 | 0.653916 | 1.00E-28 | 47350 | 1752 | 45598 |
| 287 Purpura an        | 1.377907 | 1.584356 | 1.479546 | 2.78E-28 | 45789 | 539  | 45250 |
| 509.8 Dependenc       | 1.620218 | 2.002064 | 1.805667 | 4.05E-28 | 43897 | 96   | 43801 |
| 562 Diverticulo       | 0.700644 | 0.780258 | 0.739681 | 4.68E-28 | 44126 | 3169 | 40957 |
| 571 Chronic live      | 1.240753 | 1.363263 | 1.30121  | 5.33E-28 | 43824 | 1926 | 41898 |
| 389 Hearing los       | 0.687287 | 0.770429 | 0.727994 | 1.20E-27 | 47045 | 2822 | 44223 |
| 411.4 Coronary at     | 1.177354 | 1.265702 | 1.220838 | 3.02E-27 | 46097 | 5067 | 41030 |

|                     |          |          |          |          |       |      |       |
|---------------------|----------|----------|----------|----------|-------|------|-------|
| 367.1 Myopia        | 0.528147 | 0.642657 | 0.583117 | 4.65E-27 | 46697 | 1099 | 45598 |
| 702.1 Actinic kera  | 0.613862 | 0.713563 | 0.66231  | 7.35E-27 | 45892 | 1697 | 44195 |
| 573.4 Acute and s   | 1.646011 | 2.070181 | 1.852072 | 1.82E-26 | 41963 | 65   | 41898 |
| 427.12 Paroxysmal   | 1.34327  | 1.539849 | 1.439755 | 1.14E-25 | 39412 | 637  | 38775 |
| 173 Neoplasm c      | 0.647081 | 0.742391 | 0.693512 | 1.63E-25 | 45435 | 2008 | 43427 |
| 276.4 Acid-base b   | 1.416243 | 1.666744 | 1.539566 | 1.69E-25 | 43638 | 308  | 43330 |
| 571.5 Other chroi   | 1.231853 | 1.358126 | 1.294206 | 3.43E-25 | 43678 | 1780 | 41898 |
| 394 Rheumatic       | 1.39796  | 1.637559 | 1.515808 | 4.86E-25 | 46103 | 318  | 45785 |
| 426.9 Cardiac pac   | 1.310985 | 1.491263 | 1.399383 | 1.39E-24 | 39615 | 840  | 38775 |
| 496.1 Emphysem:     | 1.346865 | 1.55365  | 1.449011 | 1.97E-24 | 43500 | 490  | 43010 |
| 426.92 Cardiac def  | 1.393166 | 1.637444 | 1.512743 | 8.57E-24 | 39166 | 391  | 38775 |
| 512.7 Shortness c   | 1.151609 | 1.233982 | 1.192224 | 1.87E-23 | 37859 | 4823 | 33036 |
| 599 Other symp      | 0.748731 | 0.823467 | 0.785479 | 2.58E-23 | 46128 | 3769 | 42359 |
| 747.11 Cardiac shu  | 1.373316 | 1.609195 | 1.490566 | 3.35E-23 | 47814 | 349  | 47465 |
| 428.4 Heart failur  | 1.476245 | 1.79256  | 1.63001  | 5.05E-23 | 44627 | 208  | 44419 |
| 280 Iron deficie    | 1.44749  | 1.744944 | 1.595218 | 6.10E-23 | 46585 | 167  | 46418 |
| 600 Hyperplasia     | 0.715557 | 0.799534 | 0.756723 | 7.11E-23 | 44193 | 2885 | 41308 |
| 389.1 Sensorineu    | 0.642152 | 0.743733 | 0.691561 | 7.38E-23 | 45937 | 1714 | 44223 |
| 569.2 Gastrointes   | 1.342945 | 1.558251 | 1.449981 | 7.94E-23 | 45364 | 420  | 44944 |
| 480 Pneumonia       | 1.227437 | 1.36157  | 1.293792 | 1.90E-22 | 43478 | 1334 | 42144 |
| 297 Suicidal ide    | 1.255453 | 1.409385 | 1.331252 | 2.80E-22 | 37630 | 1390 | 36240 |
| 503 Pulmonary       | 1.484525 | 1.818146 | 1.647563 | 3.09E-22 | 43971 | 170  | 43801 |
| 155 Cancer of li    | 1.478067 | 1.808557 | 1.641534 | 3.15E-22 | 46732 | 113  | 46619 |
| 797 Shock           | 1.470923 | 1.797788 | 1.633969 | 3.64E-22 | 48299 | 108  | 48191 |
| 276.41 Acidosis     | 1.395998 | 1.659208 | 1.526149 | 4.79E-22 | 43598 | 268  | 43330 |
| 395 Heart valve     | 1.229718 | 1.367388 | 1.297637 | 5.79E-22 | 47121 | 1336 | 45785 |
| 796 Elevated pr     | 0.613782 | 0.724369 | 0.667391 | 1.09E-21 | 42603 | 1295 | 41308 |
| 585.3 Chronic ren   | 1.28061  | 1.457734 | 1.367825 | 2.24E-21 | 45378 | 734  | 44644 |
| 394.7 Disease of t  | 1.439213 | 1.74621  | 1.590565 | 3.09E-21 | 45939 | 154  | 45785 |
| 425.2 Secondary/    | 1.355901 | 1.592892 | 1.473092 | 3.17E-21 | 47188 | 333  | 46855 |
| 317.11 Alcoholic li | 1.428566 | 1.728251 | 1.577564 | 3.30E-21 | 39722 | 168  | 39554 |
| 427.1 Paroxysmal    | 1.248896 | 1.40757  | 1.327046 | 1.63E-20 | 39837 | 1062 | 38775 |
| 458.9 Hypotensio    | 1.337769 | 1.568774 | 1.452287 | 3.02E-20 | 47203 | 345  | 46858 |

|                    |          |          |          |          |       |      |       |
|--------------------|----------|----------|----------|----------|-------|------|-------|
| 280.1 Iron deficie | 1.457107 | 1.794098 | 1.624382 | 3.17E-20 | 46551 | 133  | 46418 |
| 296.1 Bipolar      | 1.220637 | 1.360295 | 1.28953  | 3.26E-20 | 37879 | 1639 | 36240 |
| 504 Other alvecl   | 1.433932 | 1.748147 | 1.587128 | 4.67E-20 | 43994 | 193  | 43801 |
| 509.3 Pulmonary    | 1.404662 | 1.696709 | 1.548683 | 6.63E-20 | 44075 | 274  | 43801 |
| 155.1 Malignant r  | 1.462745 | 1.810058 | 1.635227 | 6.89E-20 | 46718 | 99   | 46619 |
| 470 Septal Devi    | 0.670541 | 0.773414 | 0.720624 | 2.33E-19 | 39080 | 1806 | 37274 |
| 760 Back pain      | 0.817493 | 0.879363 | 0.848045 | 8.32E-19 | 45408 | 6535 | 38873 |
| 747.13 Congenital  | 1.493614 | 1.893197 | 1.69253  | 9.66E-19 | 47556 | 91   | 47465 |
| 840 Sprains and    | 0.730749 | 0.818822 | 0.773889 | 1.05E-18 | 44884 | 2746 | 42138 |
| 427.7 Tachycardia  | 1.216084 | 1.360714 | 1.287519 | 1.07E-18 | 40131 | 1356 | 38775 |
| 288.2 Elevated wl  | 1.283704 | 1.483006 | 1.382195 | 1.24E-18 | 44496 | 675  | 43821 |
| 501 Pneumoniti     | 1.483477 | 1.870033 | 1.673408 | 1.25E-18 | 43912 | 111  | 43801 |
| 605 Erectile dys   | 0.725599 | 0.815364 | 0.769581 | 1.36E-18 | 41191 | 2388 | 38803 |
| 366.2 Senile catar | 0.708792 | 0.803919 | 0.755305 | 2.46E-18 | 47154 | 2163 | 44991 |
| 458 Hypotensio     | 1.266306 | 1.454654 | 1.359701 | 3.14E-18 | 47461 | 603  | 46858 |
| 429.1 Heart trans  | 1.505083 | 1.926498 | 1.712778 | 3.95E-18 | 44508 | 89   | 44419 |
| 297.2 Suicide or s | 1.344601 | 1.603216 | 1.472176 | 4.98E-18 | 36626 | 386  | 36240 |
| 758.1 Chromosom    | 1.560926 | 2.048623 | 1.801734 | 5.01E-18 | 47269 | 60   | 47209 |
| 504.1 Idiopathic f | 1.429906 | 1.768872 | 1.59509  | 5.30E-18 | 43955 | 154  | 43801 |
| 426 Cardiac con    | 1.170114 | 1.28574  | 1.227119 | 1.61E-17 | 40922 | 2147 | 38775 |
| 452 Other veno     | 1.261277 | 1.451654 | 1.35586  | 1.73E-17 | 43712 | 584  | 43128 |
| 395.1 Nonrheuma    | 1.253298 | 1.437716 | 1.344505 | 2.43E-17 | 46424 | 639  | 45785 |
| 276.6 Fluid overlc | 1.448261 | 1.826823 | 1.636114 | 4.27E-17 | 43415 | 85   | 43330 |
| 539 Bariatric su   | 1.327467 | 1.583553 | 1.456105 | 4.40E-17 | 48305 | 270  | 48035 |
| 761 Cervicalgia    | 0.747077 | 0.834346 | 0.789865 | 5.79E-17 | 46753 | 2811 | 43942 |
| 276.1 Electrolyte  | 1.179438 | 1.306465 | 1.242296 | 8.68E-17 | 44962 | 1632 | 43330 |
| 571.81 Portal hype | 1.374022 | 1.67975  | 1.526541 | 8.82E-17 | 42062 | 164  | 41898 |
| 198 Secondary i    | 1.240159 | 1.418256 | 1.328393 | 9.45E-17 | 45793 | 704  | 45089 |
| 455 Hemorrhoid     | 0.686662 | 0.79251  | 0.738191 | 1.05E-16 | 44855 | 1727 | 43128 |
| 366 Cataract       | 0.740483 | 0.830782 | 0.784736 | 1.49E-16 | 47543 | 2552 | 44991 |
| 38 Septicemia      | 1.352817 | 1.64269  | 1.498705 | 1.79E-16 | 47347 | 188  | 47159 |
| 70 Viral hepati    | 1.192803 | 1.334254 | 1.262949 | 2.94E-16 | 42283 | 1181 | 41102 |
| 599.5 Frequency    | 0.694441 | 0.79974  | 0.745764 | 3.84E-16 | 44040 | 1681 | 42359 |

|        |               |          |          |          |          |       |      |       |
|--------|---------------|----------|----------|----------|----------|-------|------|-------|
| 70.3   | Viral hepati  | 1.208861 | 1.365196 | 1.286465 | 4.21E-16 | 42030 | 928  | 41102 |
| 276    | Disorders o   | 1.134998 | 1.23043  | 1.182205 | 4.27E-16 | 46563 | 3233 | 43330 |
| 286    | Coagulator    | 1.248506 | 1.441014 | 1.343951 | 5.54E-16 | 45951 | 701  | 45250 |
| 365.1  | Open-angle    | 0.574654 | 0.712866 | 0.640909 | 6.02E-16 | 46194 | 760  | 45434 |
| 502    | Postinflamr   | 1.317928 | 1.578984 | 1.446493 | 9.02E-16 | 44125 | 324  | 43801 |
| 573.5  | Jaundice (n   | 1.402198 | 1.760323 | 1.583591 | 9.16E-16 | 42010 | 112  | 41898 |
| 427    | Cardiac dys   | 1.100389 | 1.170636 | 1.135098 | 9.84E-16 | 45601 | 6826 | 38775 |
| 365    | Glaucoma      | 0.641303 | 0.764068 | 0.700704 | 1.75E-15 | 46529 | 1095 | 45434 |
| 530.2  | Esophageal    | 1.411924 | 1.782081 | 1.597303 | 1.76E-15 | 39337 | 113  | 39224 |
| 411.8  | Other chroi   | 1.190704 | 1.336351 | 1.262316 | 2.39E-15 | 42405 | 1375 | 41030 |
| 510    | Other disea   | 1.168412 | 1.295405 | 1.231345 | 2.52E-15 | 47884 | 1545 | 46339 |
| 380.4  | Impacted c    | 0.640162 | 0.7642   | 0.70014  | 3.08E-15 | 46474 | 1135 | 45339 |
| 379.2  | Disorders o   | 0.605542 | 0.739056 | 0.669806 | 3.20E-15 | 45017 | 898  | 44119 |
| 726.1  | Enthesopat    | 0.622798 | 0.752011 | 0.68513  | 3.83E-15 | 41014 | 998  | 40016 |
| 572    | Ascites (noi  | 1.31213  | 1.579446 | 1.446152 | 4.12E-15 | 42163 | 265  | 41898 |
| 165.1  | Cancer of b   | 1.307908 | 1.570756 | 1.439003 | 4.78E-15 | 48253 | 241  | 48012 |
| 296    | Mood disor    | 1.109033 | 1.188594 | 1.148351 | 4.94E-15 | 41667 | 5427 | 36240 |
| 706    | Diseases of   | 0.679844 | 0.793266 | 0.734931 | 5.17E-15 | 46144 | 1575 | 44569 |
| 165    | Cancer with   | 1.303943 | 1.565238 | 1.434242 | 7.20E-15 | 48258 | 246  | 48012 |
| 289    | Other disea   | 1.319868 | 1.599192 | 1.459229 | 8.55E-15 | 44073 | 252  | 43821 |
| 994.2  | Sepsis        | 1.394569 | 1.766358 | 1.583571 | 1.01E-14 | 48216 | 83   | 48133 |
| 427.22 | Atrial flutte | 1.234507 | 1.426726 | 1.32893  | 1.20E-14 | 39490 | 715  | 38775 |
| 516.1  | Hemoptysis    | 1.306839 | 1.577536 | 1.442855 | 1.54E-14 | 48203 | 226  | 47977 |
| 599.3  | Dysuria       | 0.643661 | 0.769616 | 0.704516 | 1.58E-14 | 43477 | 1118 | 42359 |
| 389.4  | Tinnitus      | 0.565577 | 0.712787 | 0.635887 | 1.73E-14 | 44937 | 714  | 44223 |
| 379    | Other disor   | 0.660901 | 0.782443 | 0.719809 | 2.31E-14 | 45317 | 1198 | 44119 |
| 381    | Otitis medi   | 0.689348 | 0.80248  | 0.744343 | 2.64E-14 | 45401 | 1572 | 43829 |
| 758    | Chromoson     | 1.441679 | 1.887409 | 1.666775 | 3.62E-14 | 47291 | 82   | 47209 |
| 276.13 | Hyperpotas    | 1.277785 | 1.523656 | 1.400358 | 4.88E-14 | 43652 | 322  | 43330 |
| 798    | Malaise anc   | 0.854442 | 0.911828 | 0.882826 | 5.68E-14 | 44270 | 8285 | 35985 |
| 513.4  | Hyperventil   | 1.367523 | 1.722893 | 1.547533 | 6.02E-14 | 47642 | 116  | 47526 |
| 516    | Abnormal s    | 1.292836 | 1.558928 | 1.42662  | 7.01E-14 | 48218 | 241  | 47977 |
| 348.7  | Coma          | 1.40361  | 1.808817 | 1.610279 | 7.61E-14 | 42333 | 74   | 42259 |

|                     |          |          |          |          |       |      |       |
|---------------------|----------|----------|----------|----------|-------|------|-------|
| 297.1 Suicidal ide  | 1.199597 | 1.366946 | 1.282261 | 7.91E-14 | 37332 | 1092 | 36240 |
| 172.2 Other non-r   | 0.697584 | 0.810025 | 0.752331 | 8.45E-14 | 44980 | 1553 | 43427 |
| 585.31 Renal dialys | 1.493313 | 2.024289 | 1.75629  | 9.90E-14 | 44672 | 28   | 44644 |
| 427.9 Palpitations  | 0.757471 | 0.850426 | 0.802986 | 1.09E-13 | 41506 | 2731 | 38775 |
| 288 Diseases of     | 1.185921 | 1.342476 | 1.263373 | 1.39E-13 | 44963 | 1142 | 43821 |
| 198.2 Secondary i   | 1.317571 | 1.619214 | 1.46864  | 1.75E-13 | 45258 | 169  | 45089 |
| 172 Skin cancer     | 0.730141 | 0.833137 | 0.780471 | 1.82E-13 | 45390 | 1963 | 43427 |
| 785 Abdominal       | 0.855609 | 0.913755 | 0.884362 | 2.37E-13 | 45535 | 8342 | 37193 |
| 747.1 Cardiac con   | 1.219632 | 1.417046 | 1.31828  | 4.59E-13 | 48063 | 598  | 47465 |
| 687.1 Rash and ot   | 0.711693 | 0.822768 | 0.765797 | 5.57E-13 | 43195 | 1626 | 41569 |
| 994 Sepsis and i    | 1.316533 | 1.633963 | 1.478225 | 7.83E-13 | 48289 | 156  | 48133 |
| 427.4 Cardiac arr   | 1.327326 | 1.656908 | 1.491228 | 1.02E-12 | 38941 | 166  | 38775 |
| 260.1 Cachexia      | 1.450711 | 1.966951 | 1.715442 | 1.10E-12 | 44753 | 32   | 44721 |
| 295.1 Schizophre    | 1.222307 | 1.426959 | 1.323525 | 1.15E-12 | 36866 | 626  | 36240 |
| 327 Sleep disor     | 0.776424 | 0.866096 | 0.820415 | 1.26E-12 | 43130 | 2850 | 40280 |
| 523.1 Gingivitis    | 0.460856 | 0.645186 | 0.546568 | 1.99E-12 | 46229 | 387  | 45842 |
| 727 Other disor     | 0.734895 | 0.840727 | 0.786593 | 2.70E-12 | 41817 | 1801 | 40016 |
| 198.4 Secondary i   | 1.328004 | 1.675482 | 1.503457 | 3.37E-12 | 45197 | 108  | 45089 |
| 939 Atopic/cont     | 0.706032 | 0.82284  | 0.762844 | 4.23E-12 | 44194 | 1446 | 42748 |
| 601.1 Prostatitis   | 0.575694 | 0.734123 | 0.651211 | 4.72E-12 | 41926 | 618  | 41308 |
| 706.2 Sebaceous     | 0.628726 | 0.771778 | 0.697499 | 5.73E-12 | 45437 | 868  | 44569 |
| 414 Other form      | 1.181218 | 1.350758 | 1.264952 | 6.03E-12 | 41913 | 883  | 41030 |
| 512.8 Cough         | 0.837473 | 0.905977 | 0.871255 | 6.38E-12 | 38874 | 5838 | 33036 |
| 260 Protein-cal     | 1.266134 | 1.537459 | 1.402926 | 6.51E-12 | 44974 | 253  | 44721 |
| 722 Interverteb     | 0.794768 | 0.880125 | 0.83673  | 7.43E-12 | 44891 | 3115 | 41776 |
| 375.1 Dry eyes      | 0.668999 | 0.800136 | 0.73246  | 9.33E-12 | 45168 | 1049 | 44119 |
| 386.9 Dizziness ar  | 0.761275 | 0.860275 | 0.80975  | 1.33E-11 | 46236 | 2181 | 44055 |
| 371 Inflammatic     | 0.725415 | 0.837829 | 0.780221 | 1.47E-11 | 44659 | 1561 | 43098 |
| 296.22 Major depr   | 1.139964 | 1.27009  | 1.204333 | 1.51E-11 | 37999 | 1759 | 36240 |
| 579.2 Splenomeg     | 1.270292 | 1.557609 | 1.415492 | 1.74E-11 | 43222 | 236  | 42986 |
| 282 Hereditary      | 1.38179  | 1.826948 | 1.60381  | 1.87E-11 | 46495 | 77   | 46418 |
| 747 Cardiac anc     | 1.184655 | 1.367909 | 1.276123 | 2.83E-11 | 48187 | 722  | 47465 |
| 415.1 Acute pulm    | 1.272087 | 1.564713 | 1.417461 | 3.24E-11 | 46119 | 264  | 45855 |



|                    |          |          |          |          |       |      |       |
|--------------------|----------|----------|----------|----------|-------|------|-------|
| 722.6 Degenerati   | 0.76636  | 0.865479 | 0.814916 | 4.26E-11 | 43947 | 2171 | 41776 |
| 287.32 Secondary t | 1.360298 | 1.801165 | 1.583725 | 5.65E-11 | 45327 | 77   | 45250 |
| 300.9 Posttrauma   | 1.205968 | 1.419827 | 1.312336 | 6.04E-11 | 36811 | 571  | 36240 |
| 440 Atheroscler    | 1.181355 | 1.365858 | 1.272695 | 6.81E-11 | 46334 | 671  | 45663 |
| 741.2 Stiffness of | 0.61101  | 0.766617 | 0.685457 | 6.90E-11 | 44073 | 712  | 43361 |
| 475 Chronic sin    | 0.739686 | 0.850176 | 0.793614 | 7.67E-11 | 38973 | 1699 | 37274 |
| 523 Gingival an    | 0.538514 | 0.717259 | 0.62274  | 9.45E-11 | 46334 | 492  | 45842 |
| 250.41 Impaired fa | 0.645894 | 0.791115 | 0.715812 | 1.05E-10 | 40783 | 853  | 39930 |
| 550.1 Inguinal he  | 0.676853 | 0.81161  | 0.742018 | 1.20E-10 | 46013 | 1046 | 44967 |
| 709 Diffuse dise   | 1.267962 | 1.576405 | 1.424797 | 1.28E-10 | 44200 | 167  | 44033 |
| 444 Arterial em    | 1.294533 | 1.641394 | 1.469252 | 1.31E-10 | 45791 | 128  | 45663 |
| 707 Chronic ulc    | 1.235083 | 1.49597  | 1.366638 | 1.35E-10 | 48171 | 268  | 47903 |
| 426.2 Atrioventric | 1.225953 | 1.474311 | 1.348382 | 1.82E-10 | 39159 | 384  | 38775 |
| 426.91 Cardiac pac | 1.202249 | 1.420187 | 1.309671 | 1.96E-10 | 39299 | 524  | 38775 |
| 459.9 Circulatory  | 1.24401  | 1.523281 | 1.38443  | 2.39E-10 | 47096 | 238  | 46858 |
| 420 Carditis       | 1.235535 | 1.510924 | 1.374738 | 4.60E-10 | 47118 | 263  | 46855 |
| 459 Other disor    | 1.223649 | 1.481657 | 1.35316  | 4.83E-10 | 47158 | 300  | 46858 |
| 38.2 Gram positi   | 1.398983 | 1.992501 | 1.711745 | 5.51E-10 | 47183 | 24   | 47159 |
| 198.3 Secondary i  | 1.327632 | 1.762973 | 1.55148  | 5.58E-10 | 45149 | 60   | 45089 |
| 747.12 Valvular he | 1.292823 | 1.661029 | 1.479693 | 5.98E-10 | 47626 | 161  | 47465 |
| 480.1 Bacterial pr | 1.255582 | 1.566429 | 1.413745 | 6.01E-10 | 42309 | 165  | 42144 |
| 295 Schizophre     | 1.149197 | 1.309687 | 1.228591 | 6.47E-10 | 37326 | 1086 | 36240 |
| 420.3 Endocarditi  | 1.35389  | 1.852657 | 1.614795 | 6.89E-10 | 46898 | 43   | 46855 |
| 741 Symptoms       | 0.798178 | 0.890103 | 0.843323 | 8.92E-10 | 46023 | 2662 | 43361 |
| 707.1 Decubitus u  | 1.312312 | 1.735374 | 1.532242 | 1.03E-09 | 47975 | 72   | 47903 |
| 381.2 Eustachian   | 0.638347 | 0.793497 | 0.712789 | 1.08E-09 | 44598 | 769  | 43829 |
| 495.1 Chronic obs  | 1.269123 | 1.608393 | 1.440761 | 1.12E-09 | 43158 | 148  | 43010 |
| 250.4 Abnormal g   | 0.776221 | 0.87824  | 0.82619  | 1.36E-09 | 42056 | 2126 | 39930 |
| 687.4 Disturbanc   | 0.762674 | 0.870383 | 0.815327 | 1.39E-09 | 43436 | 1867 | 41569 |
| 938 Dermatitis     | 0.541114 | 0.729833 | 0.630075 | 1.46E-09 | 43163 | 415  | 42748 |
| 276.42 Alkalosis   | 1.367232 | 1.922123 | 1.656851 | 1.68E-09 | 43361 | 31   | 43330 |
| 585.32 End stage r | 1.324038 | 1.776238 | 1.555344 | 1.68E-09 | 44701 | 57   | 44644 |
| 601 Inflammato     | 0.701518 | 0.83489  | 0.766142 | 2.00E-09 | 42416 | 1108 | 41308 |

|                     |          |          |          |          |       |      |       |
|---------------------|----------|----------|----------|----------|-------|------|-------|
| 979 Adverse dru     | 1.169037 | 1.365636 | 1.267032 | 2.28E-09 | 46498 | 656  | 45842 |
| 938.2 Chronic der   | 0.534876 | 0.728204 | 0.625834 | 2.67E-09 | 43139 | 391  | 42748 |
| 458.2 Iatrogenic f  | 1.350289 | 1.87782  | 1.623056 | 2.71E-09 | 46892 | 34   | 46858 |
| 440.2 Atheroscler   | 1.211537 | 1.472017 | 1.341589 | 2.81E-09 | 45952 | 289  | 45663 |
| 854 Complicatic     | 1.225508 | 1.509485 | 1.368677 | 3.09E-09 | 47029 | 239  | 46790 |
| 505 Other pulm      | 1.337522 | 1.836321 | 1.592186 | 3.45E-09 | 43854 | 53   | 43801 |
| 38.3 Bacteremia     | 1.291114 | 1.702064 | 1.503698 | 3.91E-09 | 47242 | 83   | 47159 |
| 81 Infection/ir     | 1.251964 | 1.588052 | 1.424185 | 4.01E-09 | 47957 | 150  | 47807 |
| 427.5 Arrhythmia    | 1.128358 | 1.274905 | 1.200767 | 4.14E-09 | 40017 | 1242 | 38775 |
| 472 Chronic pha     | 0.67386  | 0.820306 | 0.744505 | 4.14E-09 | 38149 | 875  | 37274 |
| 185 Cancer of p     | 0.731163 | 0.854935 | 0.791445 | 4.58E-09 | 42544 | 1236 | 41308 |
| 274.1 Gout          | 1.114044 | 1.244919 | 1.178871 | 6.22E-09 | 47833 | 1466 | 46367 |
| 989 Toxic effect    | 1.302655 | 1.756341 | 1.539785 | 7.24E-09 | 48080 | 63   | 48017 |
| 285.1 Acute postf   | 1.223049 | 1.51647  | 1.371027 | 7.24E-09 | 46648 | 230  | 46418 |
| 426.24 Atrioventric | 1.236663 | 1.550358 | 1.392144 | 7.38E-09 | 38987 | 212  | 38775 |
| 371.2 Conjunctivi   | 0.667646 | 0.818771 | 0.740466 | 7.92E-09 | 43893 | 795  | 43098 |
| 969 Poisoning b     | 1.234502 | 1.547518 | 1.391958 | 8.15E-09 | 46095 | 253  | 45842 |
| 382 Otalgia         | 0.545758 | 0.741644 | 0.637816 | 9.23E-09 | 44236 | 407  | 43829 |
| 513.32 Orthopnea    | 1.31783  | 1.822753 | 1.579396 | 1.32E-08 | 47565 | 39   | 47526 |
| 41 Bacterial in     | 1.16208  | 1.366788 | 1.264508 | 1.37E-08 | 47728 | 569  | 47159 |
| 599.9 Other abno    | 0.645632 | 0.807721 | 0.723384 | 1.48E-08 | 43027 | 668  | 42359 |
| 110 Dermatoph       | 0.73861  | 0.862975 | 0.799145 | 1.64E-08 | 46370 | 1302 | 45068 |
| 274 Gout and o      | 1.106395 | 1.233366 | 1.169278 | 1.65E-08 | 47932 | 1565 | 46367 |
| 608 Other disor     | 0.699997 | 0.840878 | 0.768113 | 1.72E-08 | 39830 | 1027 | 38803 |
| 296.2 Depression    | 1.075325 | 1.162642 | 1.118507 | 1.86E-08 | 40367 | 4127 | 36240 |
| 204 Leukemia        | 1.198    | 1.463772 | 1.331074 | 1.96E-08 | 47455 | 322  | 47133 |
| 195 Cancer, sus     | 1.176411 | 1.411097 | 1.293915 | 2.55E-08 | 45457 | 368  | 45089 |
| 197 Chemother       | 1.186289 | 1.438805 | 1.313359 | 2.76E-08 | 45422 | 333  | 45089 |
| 386 Vertiginous     | 0.622024 | 0.796187 | 0.705125 | 2.93E-08 | 44626 | 571  | 44055 |
| 443.9 Peripheral \  | 1.163043 | 1.378305 | 1.269829 | 3.27E-08 | 46136 | 473  | 45663 |
| 797.1 Cardiogenic   | 1.298138 | 1.799904 | 1.561868 | 3.72E-08 | 48230 | 39   | 48191 |
| 727.1 Synovitis ar  | 0.69457  | 0.841413 | 0.765527 | 4.80E-08 | 40909 | 893  | 40016 |
| 426.32 Left bundle  | 1.221124 | 1.542458 | 1.380205 | 5.01E-08 | 38976 | 201  | 38775 |

|                     |          |          |          |          |       |      |       |
|---------------------|----------|----------|----------|----------|-------|------|-------|
| 555.1 Regional er   | 1.168998 | 1.400953 | 1.285208 | 5.20E-08 | 41429 | 472  | 40957 |
| 415.11 Pulmonary    | 1.222304 | 1.546515 | 1.384205 | 5.26E-08 | 46070 | 215  | 45855 |
| 444.1 Arterial em   | 1.30925  | 1.859516 | 1.596678 | 5.92E-08 | 45696 | 33   | 45663 |
| 443 Peripheral v    | 1.146352 | 1.342687 | 1.243723 | 6.06E-08 | 46255 | 592  | 45663 |
| 291.8 Alteration c  | 1.146017 | 1.342927 | 1.244424 | 6.23E-08 | 44417 | 631  | 43786 |
| 958 Certain earl    | 1.211536 | 1.525758 | 1.371796 | 6.44E-08 | 48299 | 195  | 48104 |
| 427.42 Cardiac arr  | 1.255742 | 1.662292 | 1.462774 | 6.52E-08 | 38876 | 101  | 38775 |
| 740.11 Osteoarthr   | 0.779903 | 0.89043  | 0.833976 | 7.94E-08 | 44434 | 1729 | 42705 |
| 585.2 Renal failur  | 1.276616 | 1.747146 | 1.519717 | 8.46E-08 | 44698 | 54   | 44644 |
| 371.21 Allergic con | 0.654693 | 0.821824 | 0.734876 | 1.11E-07 | 43735 | 637  | 43098 |
| 110.1 Dermatoph     | 0.737831 | 0.868813 | 0.801508 | 1.12E-07 | 46237 | 1169 | 45068 |
| 78 Viral warts      | 0.718307 | 0.858342 | 0.786098 | 1.19E-07 | 42212 | 1110 | 41102 |
| 280.2 Iron deficie  | 1.303024 | 1.880736 | 1.609583 | 1.25E-07 | 46447 | 29   | 46418 |
| 348.2 Cerebral ed   | 1.177548 | 1.439808 | 1.309506 | 1.37E-07 | 42575 | 316  | 42259 |
| 327.4 Insomnia      | 0.750108 | 0.876788 | 0.811175 | 1.63E-07 | 41641 | 1361 | 40280 |
| 446 Polyarteriti    | 1.248289 | 1.673251 | 1.467913 | 1.77E-07 | 45751 | 88   | 45663 |
| 835 Internal dei    | 0.710547 | 0.855609 | 0.780713 | 1.78E-07 | 46222 | 979  | 45243 |
| 426.3 Bundle brai   | 1.161503 | 1.39915  | 1.279194 | 1.98E-07 | 39193 | 418  | 38775 |
| 479 Other uppe      | 0.774462 | 0.891512 | 0.831629 | 2.85E-07 | 38893 | 1619 | 37274 |
| 694 Dyschromia      | 0.536374 | 0.755529 | 0.638657 | 2.95E-07 | 44524 | 320  | 44204 |
| 276.12 Hyposmola    | 1.164407 | 1.416523 | 1.29086  | 3.07E-07 | 43685 | 355  | 43330 |
| 327.3 Sleep apne:   | 1.062057 | 1.145235 | 1.103196 | 3.28E-07 | 44509 | 4229 | 40280 |
| 740 Osteoarthr      | 0.858039 | 0.933965 | 0.895492 | 3.35E-07 | 47007 | 4302 | 42705 |
| 555 Inflammato      | 1.131568 | 1.326399 | 1.22869  | 3.67E-07 | 41656 | 699  | 40957 |
| 586 Other disor     | 1.090791 | 1.21805  | 1.153776 | 3.71E-07 | 46276 | 1632 | 44644 |
| 965 Poisoning b     | 1.226529 | 1.621599 | 1.428612 | 4.23E-07 | 45975 | 133  | 45842 |
| 571.6 Primary bili  | 1.285433 | 1.902758 | 1.614528 | 5.37E-07 | 41925 | 27   | 41898 |
| 694.2 Other dyscl   | 0.517901 | 0.748575 | 0.624937 | 5.79E-07 | 44482 | 278  | 44204 |
| 359 Muscular d      | 1.191932 | 1.519747 | 1.359743 | 6.03E-07 | 46680 | 161  | 46519 |
| 782.3 Edema         | 1.092069 | 1.226689 | 1.158812 | 6.61E-07 | 47018 | 1351 | 45667 |
| 286.7 Other and t   | 1.15246  | 1.394945 | 1.273543 | 6.68E-07 | 45697 | 447  | 45250 |
| 228.1 Hemangion     | 0.362159 | 0.641261 | 0.485096 | 7.12E-07 | 47687 | 136  | 47551 |
| 830 Dislocation     | 0.77488  | 0.895014 | 0.833504 | 7.37E-07 | 46820 | 1577 | 45243 |

|                    |          |          |          |          |       |      |       |
|--------------------|----------|----------|----------|----------|-------|------|-------|
| 361 Retinal det    | 0.528714 | 0.757499 | 0.635131 | 7.64E-07 | 45718 | 284  | 45434 |
| 195.1 Malignant r  | 1.162207 | 1.429255 | 1.296553 | 7.79E-07 | 45365 | 276  | 45089 |
| 198.5 Secondary i  | 1.202836 | 1.578287 | 1.395314 | 1.15E-06 | 45200 | 111  | 45089 |
| 728.71 Contracture | 0.348406 | 0.636196 | 0.474385 | 1.24E-06 | 40134 | 118  | 40016 |
| 110.11 Dermatoph   | 0.696876 | 0.857518 | 0.77432  | 1.36E-06 | 45799 | 731  | 45068 |
| 395.6 Heart valve  | 1.202507 | 1.581989 | 1.396453 | 1.39E-06 | 45902 | 117  | 45785 |
| 250.2 Type 2 diab  | 1.051799 | 1.128224 | 1.089579 | 1.62E-06 | 44908 | 4978 | 39930 |
| 735 Acquired fo    | 0.691144 | 0.855568 | 0.770274 | 1.66E-06 | 46274 | 716  | 45558 |
| 367.2 Astigmatism  | 0.558865 | 0.782063 | 0.663181 | 1.69E-06 | 45929 | 331  | 45598 |
| 727.4 Ganglion ar  | 0.489467 | 0.739222 | 0.604184 | 1.70E-06 | 40242 | 226  | 40016 |
| 427.41 Ventricular | 1.214149 | 1.634913 | 1.429223 | 1.72E-06 | 38871 | 96   | 38775 |
| 250 Diabetes m     | 1.050179 | 1.124645 | 1.086997 | 1.80E-06 | 45202 | 5272 | 39930 |
| 440.22 Atheroscler | 1.16769  | 1.468258 | 1.318832 | 1.92E-06 | 45876 | 213  | 45663 |
| 150 Cancer of e    | 1.255545 | 1.843025 | 1.564709 | 1.94E-06 | 46649 | 30   | 46619 |
| 578.8 Hemorrhag    | 0.70007  | 0.861097 | 0.777614 | 1.94E-06 | 43780 | 794  | 42986 |
| 228 Hemangion      | 0.492478 | 0.742591 | 0.60732  | 1.97E-06 | 47786 | 235  | 47551 |
| 395.4 Nonrheuma    | 1.231061 | 1.725995 | 1.490973 | 2.12E-06 | 45844 | 59   | 45785 |
| 348 Other cond     | 1.116511 | 1.309824 | 1.212726 | 2.18E-06 | 42937 | 678  | 42259 |
| 189 Cancer of u    | 1.107883 | 1.284784 | 1.195662 | 2.22E-06 | 48250 | 728  | 47522 |
| 585.33 Chronic Kid | 1.129681 | 1.350554 | 1.239561 | 2.33E-06 | 45089 | 445  | 44644 |
| 274.11 Gouty arthr | 1.119476 | 1.323435 | 1.221168 | 2.82E-06 | 46906 | 539  | 46367 |
| 550 Abdominal      | 0.832711 | 0.927475 | 0.879292 | 2.90E-06 | 47604 | 2637 | 44967 |
| 565 Anal and re    | 0.761752 | 0.894435 | 0.8263   | 3.22E-06 | 46208 | 1264 | 44944 |
| 374.6 Dermatoch    | 0.689695 | 0.858575 | 0.771012 | 3.29E-06 | 43745 | 647  | 43098 |
| 585.34 Chronic Kid | 1.236011 | 1.784062 | 1.523255 | 3.32E-06 | 44684 | 40   | 44644 |
| 446.4 Wegener's    | 1.261068 | 1.948674 | 1.628767 | 3.39E-06 | 45684 | 21   | 45663 |
| 740.1 Osteoarthri  | 0.817864 | 0.921487 | 0.868704 | 3.75E-06 | 44773 | 2068 | 42705 |
| 601.12 Chronic pro | 0.468204 | 0.733949 | 0.589261 | 4.09E-06 | 41496 | 188  | 41308 |
| 473.4 Voice distu  | 0.669273 | 0.849719 | 0.755747 | 4.32E-06 | 37836 | 562  | 37274 |
| 578 Gastrointes    | 0.806385 | 0.916715 | 0.860402 | 4.33E-06 | 44919 | 1933 | 42986 |
| 564 Functional     | 0.688766 | 0.859857 | 0.770905 | 4.34E-06 | 41672 | 715  | 40957 |
| 290.2 Delirium du  | 1.17748  | 1.541336 | 1.364695 | 4.99E-06 | 43913 | 127  | 43786 |
| 153.2 Colon cance  | 1.155366 | 1.45475  | 1.306085 | 4.99E-06 | 43046 | 202  | 42844 |

|                    |          |          |          |          |       |       |       |
|--------------------|----------|----------|----------|----------|-------|-------|-------|
| 601.11 Acute prost | 0.53384  | 0.77637  | 0.646334 | 5.03E-06 | 41569 | 261   | 41308 |
| 301 Personality    | 1.159015 | 1.468966 | 1.315637 | 5.24E-06 | 36484 | 244   | 36240 |
| 564.1 Irritable Bo | 0.649079 | 0.840727 | 0.740329 | 5.30E-06 | 41502 | 545   | 40957 |
| 250.13 Type 1 diab | 0.259652 | 0.581564 | 0.392592 | 5.65E-06 | 40005 | 75    | 39930 |
| 380.1 Otitis exter | 0.613655 | 0.822565 | 0.712403 | 5.81E-06 | 45761 | 422   | 45339 |
| 291 Other speci    | 1.096621 | 1.268377 | 1.182037 | 6.60E-06 | 44683 | 897   | 43786 |
| 365.11 Primary op  | 0.557759 | 0.793093 | 0.667766 | 7.03E-06 | 45691 | 257   | 45434 |
| 214 Lipoma         | 0.654657 | 0.846451 | 0.746115 | 7.99E-06 | 47760 | 514   | 47246 |
| 374 Other disor    | 0.743472 | 0.890935 | 0.815043 | 9.48E-06 | 44010 | 912   | 43098 |
| 473 Diseases of    | 0.720063 | 0.880114 | 0.797411 | 9.93E-06 | 38039 | 765   | 37274 |
| 418 Nonspecific    | 0.91186  | 0.965101 | 0.938215 | 1.05E-05 | 45818 | 10897 | 34921 |
| 204.1 Lymphoid li  | 1.171125 | 1.546832 | 1.362248 | 1.16E-05 | 47285 | 152   | 47133 |
| 272.12 Hyperglyce  | 0.634406 | 0.839219 | 0.731697 | 1.22E-05 | 32178 | 421   | 31757 |
| 286.9 Abnormal c   | 1.203686 | 1.717964 | 1.472842 | 1.25E-05 | 45309 | 59    | 45250 |
| 420.2 Pericarditis | 1.153964 | 1.484673 | 1.321466 | 1.37E-05 | 47053 | 198   | 46855 |
| 690 Erythematc     | 0.605329 | 0.825793 | 0.709219 | 1.47E-05 | 44565 | 361   | 44204 |
| 690.1 Seborrheic   | 0.59666  | 0.82127  | 0.702278 | 1.48E-05 | 44548 | 344   | 44204 |
| 204.12 Lymphoid li | 1.178812 | 1.598065 | 1.392989 | 1.54E-05 | 47240 | 107   | 47133 |
| 728.7 Fasciitis    | 0.634344 | 0.841525 | 0.732692 | 1.63E-05 | 40438 | 422   | 40016 |
| 441.1 Acute vascu  | 1.2189   | 1.903505 | 1.590853 | 1.71E-05 | 45685 | 22    | 45663 |
| 401 Hypertensic    | 1.031835 | 1.087598 | 1.059349 | 1.75E-05 | 46135 | 16614 | 29521 |
| 189.1 Cancer of k  | 1.108693 | 1.327496 | 1.217854 | 1.76E-05 | 47975 | 453   | 47522 |
| 573 Other disor    | 1.100877 | 1.300867 | 1.200499 | 1.76E-05 | 42501 | 603   | 41898 |
| 840.3 Joint/ligam  | 0.686631 | 0.868104 | 0.773539 | 1.79E-05 | 42782 | 644   | 42138 |
| 41.4 E. coli       | 1.213733 | 1.842357 | 1.549592 | 1.81E-05 | 47189 | 30    | 47159 |
| 790.6 Other abno   | 0.793952 | 0.917115 | 0.854113 | 1.83E-05 | 46695 | 1469  | 45226 |
| 483 Acute bron     | 0.797783 | 0.91917  | 0.857098 | 1.99E-05 | 43694 | 1550  | 42144 |
| 340 Migraine       | 0.737089 | 0.892737 | 0.812309 | 2.13E-05 | 47496 | 951   | 46545 |
| 841 Sprains and    | 0.761821 | 0.90426  | 0.831    | 2.32E-05 | 43221 | 1083  | 42138 |
| 360.2 Progressive  | 0.2199   | 0.5691   | 0.358496 | 2.43E-05 | 45487 | 53    | 45434 |
| 41.2 Streptococ    | 1.185694 | 1.68358  | 1.447725 | 2.52E-05 | 47221 | 62    | 47159 |
| 394.1 Mitral valve | 1.173667 | 1.612232 | 1.399184 | 2.58E-05 | 45865 | 80    | 45785 |
| 338.2 Chronic pai  | 1.093597 | 1.285544 | 1.189295 | 2.64E-05 | 45983 | 664   | 45319 |

|        |              |          |          |          |          |       |      |       |
|--------|--------------|----------|----------|----------|----------|-------|------|-------|
| 478    | Throat pain  | 0.540255 | 0.797043 | 0.65892  | 2.66E-05 | 37527 | 253  | 37274 |
| 506    | Empyema a    | 1.123651 | 1.392201 | 1.257121 | 2.84E-05 | 44204 | 403  | 43801 |
| 282.9  | Other here   | 1.203489 | 1.778013 | 1.502408 | 2.91E-05 | 46467 | 49   | 46418 |
| 287.31 | Primary thr  | 1.17319  | 1.617817 | 1.402808 | 2.95E-05 | 45347 | 97   | 45250 |
| 871.2  | Open woun    | 0.700088 | 0.878006 | 0.785466 | 2.95E-05 | 43950 | 680  | 43270 |
| 704    | Diseases of  | 0.680738 | 0.869135 | 0.770781 | 2.99E-05 | 46798 | 579  | 46219 |
| 452.2  | Deep vein t  | 1.121562 | 1.392617 | 1.257878 | 3.16E-05 | 43421 | 293  | 43128 |
| 172.21 | Basal cell c | 0.634781 | 0.847427 | 0.735709 | 3.18E-05 | 43822 | 395  | 43427 |
| 790.8  | Elevated C-  | 1.157363 | 1.549128 | 1.358855 | 3.23E-05 | 45342 | 116  | 45226 |
| 594.3  | Calculus of  | 0.716802 | 0.886319 | 0.798415 | 3.26E-05 | 46486 | 765  | 45721 |
| 709.4  | Polymyositi  | 1.192096 | 1.797931 | 1.518884 | 3.35E-05 | 44060 | 27   | 44033 |
| 442.11 | Abdominal    | 1.132346 | 1.434871 | 1.283354 | 3.38E-05 | 45887 | 224  | 45663 |
| 710.1  | Osteomyeli   | 1.140122 | 1.47688  | 1.312183 | 3.60E-05 | 44859 | 172  | 44687 |
| 301.2  | Antisocial/t | 1.170163 | 1.626761 | 1.405712 | 4.03E-05 | 36332 | 92   | 36240 |
| 381.11 | Suppurativ   | 0.670309 | 0.866948 | 0.764043 | 4.17E-05 | 44369 | 540  | 43829 |
| 371.3  | Inflammati   | 0.685511 | 0.873865 | 0.775758 | 4.18E-05 | 43631 | 533  | 43098 |
| 509.5  | Respiratory  | 1.208523 | 1.961164 | 1.613561 | 4.19E-05 | 43824 | 23   | 43801 |
| 395.3  | Nonrheuma    | 1.166066 | 1.615423 | 1.398833 | 4.22E-05 | 45859 | 74   | 45785 |
| 695.42 | Systemic lu  | 1.166137 | 1.633335 | 1.412244 | 4.51E-05 | 43843 | 68   | 43775 |
| 772.2  | Spasm of m   | 0.67423  | 0.869974 | 0.76765  | 4.84E-05 | 46341 | 522  | 45819 |
| 369.5  | Conjunctivi  | 0.607827 | 0.838456 | 0.716238 | 4.85E-05 | 43434 | 336  | 43098 |
| 577    | Diseases of  | 1.104924 | 1.343829 | 1.224672 | 4.91E-05 | 48235 | 398  | 47837 |
| 381.1  | Otitis medi  | 0.713654 | 0.888115 | 0.797553 | 5.09E-05 | 44543 | 714  | 43829 |
| 411.1  | Unstable ar  | 1.072029 | 1.224559 | 1.147228 | 5.15E-05 | 42228 | 1198 | 41030 |
| 276.11 | Hyperosmo    | 1.1802   | 1.76243  | 1.491953 | 5.56E-05 | 43372 | 42   | 43330 |
| 575    | Other biliar | 1.113109 | 1.379764 | 1.24677  | 5.66E-05 | 47473 | 339  | 47134 |
| 495.11 | Chronic obs  | 1.184705 | 1.788114 | 1.505458 | 5.90E-05 | 43043 | 33   | 43010 |
| 289.9  | Abnormalit   | 1.168371 | 1.646775 | 1.414461 | 6.15E-05 | 43903 | 82   | 43821 |
| 198.6  | Secondary r  | 1.144612 | 1.533377 | 1.344283 | 6.28E-05 | 45196 | 107  | 45089 |
| 189.11 | Malignant r  | 1.098753 | 1.330934 | 1.214729 | 6.86E-05 | 47923 | 401  | 47522 |
| 401.22 | Hypertensio  | 1.10014  | 1.334553 | 1.215526 | 7.14E-05 | 29905 | 384  | 29521 |
| 740.9  | Osteoarthr   | 0.850362 | 0.946143 | 0.897489 | 7.14E-05 | 45224 | 2519 | 42705 |
| 870    | Open woun    | 1.059327 | 1.188656 | 1.12332  | 7.57E-05 | 44981 | 1711 | 43270 |

|                    |          |          |          |          |       |       |       |
|--------------------|----------|----------|----------|----------|-------|-------|-------|
| 386.2 Peripheral c | 0.632207 | 0.855434 | 0.737776 | 8.20E-05 | 44412 | 357   | 44055 |
| 689 Disorder of    | 0.681362 | 0.877888 | 0.775235 | 8.33E-05 | 46931 | 527   | 46404 |
| 559 Ileostomy s    | 1.160387 | 1.69906  | 1.447611 | 9.50E-05 | 41001 | 44    | 40957 |
| 805 Fracture of    | 1.073114 | 1.243256 | 1.1576   | 9.72E-05 | 43818 | 940   | 42878 |
| 512 Other symp     | 1.026334 | 1.082693 | 1.054204 | 0.000108 | 44526 | 11490 | 33036 |
| 279.7 Other immu   | 1.102404 | 1.365219 | 1.234489 | 0.000112 | 47202 | 333   | 46869 |
| 695.3 Rosacea      | 0.5927   | 0.840447 | 0.70859  | 0.000112 | 44495 | 291   | 44204 |
| 765 Cervical rac   | 0.71727  | 0.896493 | 0.803509 | 0.000122 | 45199 | 639   | 44560 |
| 710.19 Unspecifiec | 1.135875 | 1.54161  | 1.346069 | 0.000122 | 44795 | 108   | 44687 |
| 474.2 Chronic ton  | 0.6102   | 0.850312 | 0.722662 | 0.000126 | 37619 | 345   | 37274 |
| 763 Thoracic or    | 0.757605 | 0.913163 | 0.833027 | 0.000127 | 45463 | 903   | 44560 |
| 302.1 Decreased l  | 0.642785 | 0.865043 | 0.747943 | 0.000128 | 36633 | 393   | 36240 |
| 912 Insect bite    | 0.605243 | 0.848005 | 0.719023 | 0.000128 | 47255 | 314   | 46941 |
| 433.5 Cerebral an  | 1.127128 | 1.501151 | 1.319028 | 0.000139 | 45092 | 125   | 44967 |
| 401.1 Essential hy | 1.025336 | 1.081331 | 1.052963 | 0.000142 | 45723 | 16202 | 29521 |
| 359.1 Muscular d   | 1.15718  | 1.747528 | 1.474682 | 0.000145 | 46562 | 43    | 46519 |
| 153 Colorectal c   | 1.092033 | 1.332331 | 1.21235  | 0.000146 | 43205 | 361   | 42844 |
| 707.3 Chronic ulc  | 1.14747  | 1.658297 | 1.41649  | 0.000158 | 47960 | 57    | 47903 |
| 560 Intestinal o   | 1.085982 | 1.310751 | 1.198313 | 0.000163 | 41401 | 444   | 40957 |
| 721 Spondylosis    | 0.84543  | 0.947882 | 0.8958   | 0.000163 | 43950 | 2174  | 41776 |
| 151 Cancer of st   | 1.157448 | 1.812658 | 1.511495 | 0.000164 | 46645 | 26    | 46619 |
| 217 Vascular ha    | 0.425024 | 0.75865  | 0.572568 | 0.000166 | 44575 | 119   | 44456 |
| 580.4 Renal scler  | 1.152712 | 1.749032 | 1.470627 | 0.000182 | 44683 | 39    | 44644 |
| 587 Kidney repl    | 1.138725 | 1.613182 | 1.385435 | 0.00021  | 44727 | 83    | 44644 |
| 726.3 Bursitis     | 0.683939 | 0.88787  | 0.781382 | 0.000214 | 40480 | 464   | 40016 |
| 540.11 Acute appe  | 0.597481 | 0.851344 | 0.715637 | 0.000216 | 48217 | 328   | 47889 |
| 540.1 Appendiciti  | 0.61632  | 0.86085  | 0.730705 | 0.000236 | 48251 | 362   | 47889 |
| 305.2 Eating diso  | 1.142188 | 1.710542 | 1.44551  | 0.000248 | 36289 | 49    | 36240 |
| 217.1 Nevus, non   | 0.402731 | 0.753889 | 0.556218 | 0.000251 | 44559 | 103   | 44456 |
| 80 Postoperati     | 1.105845 | 1.428536 | 1.269492 | 0.000256 | 48023 | 216   | 47807 |
| 474 Acute and c    | 0.689294 | 0.892325 | 0.786071 | 0.00026  | 37816 | 542   | 37274 |
| 159 Malignant r    | 1.130007 | 1.591173 | 1.370254 | 0.000261 | 46697 | 78    | 46619 |
| 359.2 Myopathy     | 1.115092 | 1.490596 | 1.307779 | 0.000273 | 46643 | 124   | 46519 |

|                      |          |          |          |          |       |      |       |
|----------------------|----------|----------|----------|----------|-------|------|-------|
| 442.1 Aortic aneu    | 1.081665 | 1.315171 | 1.197669 | 0.000294 | 46079 | 416  | 45663 |
| 427.3 Other speci    | 1.059385 | 1.221048 | 1.139325 | 0.000317 | 39791 | 1016 | 38775 |
| 557 Intestinal rr    | 1.124338 | 1.57956  | 1.362111 | 0.000318 | 41039 | 82   | 40957 |
| 715.1 Sacroiliitis f | 0.451857 | 0.7864   | 0.600664 | 0.000319 | 44743 | 128  | 44615 |
| 360 Disorders o      | 0.432649 | 0.776702 | 0.584441 | 0.000328 | 45544 | 110  | 45434 |
| 275.3 Disorders o    | 1.132202 | 1.638955 | 1.39774  | 0.000331 | 47130 | 71   | 47059 |
| 701 Other hype       | 0.78988  | 0.93241  | 0.8593   | 0.000342 | 46808 | 1087 | 45721 |
| 250.7 Diabetic ret   | 0.575934 | 0.847794 | 0.70213  | 0.000343 | 45512 | 224  | 45288 |
| 276.14 Hypopotas     | 1.062786 | 1.23812  | 1.149635 | 0.000345 | 44165 | 835  | 43330 |
| 295.3 Psychosis      | 1.073181 | 1.283389 | 1.177345 | 0.000346 | 36856 | 616  | 36240 |
| 362 Other retin.     | 0.775025 | 0.927738 | 0.84925  | 0.000372 | 46175 | 887  | 45288 |
| 790.1 Elevated se    | 1.120034 | 1.564929 | 1.350431 | 0.000377 | 45310 | 84   | 45226 |
| 255 Disorders o      | 1.083641 | 1.345145 | 1.214906 | 0.000415 | 45105 | 320  | 44785 |
| 480.11 Pneumococ     | 1.127652 | 1.760518 | 1.470679 | 0.000435 | 42173 | 29   | 42144 |
| 315 Develomen        | 1.082137 | 1.342192 | 1.211937 | 0.000465 | 46502 | 379  | 46123 |
| 593 Hematuria        | 0.836722 | 0.950474 | 0.892515 | 0.000473 | 45424 | 1771 | 43653 |
| 286.5 Hemorrhag      | 1.122098 | 1.623515 | 1.382794 | 0.000474 | 45317 | 67   | 45250 |
| 255.2 Adrenal hyp    | 1.108817 | 1.515363 | 1.318619 | 0.000487 | 44902 | 117  | 44785 |
| 771.1 Swelling of    | 1.053981 | 1.212729 | 1.132726 | 0.000499 | 47115 | 1002 | 46113 |
| 532 Dysphagia        | 0.811626 | 0.943131 | 0.875814 | 0.00054  | 40559 | 1335 | 39224 |
| 276.5 Hypovolem      | 1.045815 | 1.179126 | 1.111605 | 0.000546 | 45027 | 1697 | 43330 |
| 818.2 Subarachnc     | 1.09209  | 1.414748 | 1.255189 | 0.000579 | 45923 | 232  | 45691 |
| 818 Intracranial     | 1.071533 | 1.301431 | 1.186149 | 0.00058  | 46181 | 490  | 45691 |
| 816 Cerebral lac     | 1.09959  | 1.460448 | 1.282518 | 0.000582 | 45870 | 179  | 45691 |
| 704.8 Other speci    | 0.655025 | 0.888251 | 0.765247 | 0.000583 | 46583 | 364  | 46219 |
| 302 Sexual and       | 0.700309 | 0.905626 | 0.798411 | 0.000606 | 36743 | 503  | 36240 |
| 724 Other and t      | 0.689313 | 0.901637 | 0.790597 | 0.000611 | 42230 | 454  | 41776 |
| 514 Abnormal f       | 1.055362 | 1.226787 | 1.140461 | 0.000621 | 47728 | 803  | 46925 |
| 580 Nephritis; r     | 1.087746 | 1.397992 | 1.243921 | 0.000651 | 44885 | 241  | 44644 |
| 275.51 Hypocalcen    | 1.098221 | 1.468806 | 1.28715  | 0.000655 | 47214 | 155  | 47059 |
| 766 Neuralgia, r     | 0.721323 | 0.914169 | 0.813958 | 0.000667 | 45112 | 552  | 44560 |
| 270.3 Disorders o    | 1.087603 | 1.403752 | 1.247048 | 0.000689 | 47494 | 201  | 47293 |
| 709.5 Dermatomy      | 1.110189 | 1.843882 | 1.517321 | 0.00069  | 44053 | 20   | 44033 |



|                      |          |          |          |          |       |      |       |
|----------------------|----------|----------|----------|----------|-------|------|-------|
| 440.9 Atheroscler    | 1.085012 | 1.387583 | 1.236736 | 0.000694 | 45888 | 225  | 45663 |
| 394.2 Mitral valve   | 1.115642 | 1.834237 | 1.506723 | 0.000697 | 45807 | 22   | 45785 |
| 369 Infection of     | 0.700531 | 0.908414 | 0.799841 | 0.000763 | 43574 | 476  | 43098 |
| 345.12 Partial epile | 0.735662 | 0.920835 | 0.824601 | 0.000766 | 42964 | 705  | 42259 |
| 871.1 Open woun      | 0.686572 | 0.903838 | 0.789938 | 0.000784 | 43722 | 452  | 43270 |
| 972 Poisoning b      | 1.105804 | 1.565225 | 1.344057 | 0.000788 | 45933 | 91   | 45842 |
| 819 Skull and fa     | 1.047371 | 1.197663 | 1.121633 | 0.000794 | 47030 | 1339 | 45691 |
| 947 Urticaria        | 0.650374 | 0.890891 | 0.763837 | 0.000803 | 43089 | 341  | 42748 |
| 433.11 Occlusion o   | 1.090835 | 1.449809 | 1.273642 | 0.000829 | 45116 | 149  | 44967 |
| 965.1 Opiates anc    | 1.111237 | 1.626152 | 1.379385 | 0.000852 | 45923 | 81   | 45842 |
| 344 Other paral      | 1.093879 | 1.470579 | 1.284698 | 0.000898 | 42415 | 156  | 42259 |
| 365.2 Primary ane    | 0.431424 | 0.799648 | 0.593391 | 0.000938 | 45525 | 91   | 45434 |
| 962.1 Adrenal cor    | 1.110403 | 1.738224 | 1.446933 | 0.000947 | 45884 | 42   | 45842 |
| 250.42 Other abno    | 0.818399 | 0.949403 | 0.882449 | 0.000967 | 41261 | 1331 | 39930 |
| 681.1 Cellulitis an  | 0.674405 | 0.902404 | 0.782586 | 0.00098  | 43597 | 391  | 43206 |
| 577.2 Chronic par    | 1.098852 | 1.555491 | 1.336791 | 0.000984 | 47923 | 86   | 47837 |
| 580.2 Nephrotic s    | 1.109338 | 1.70879  | 1.426782 | 0.001003 | 44692 | 48   | 44644 |
| 840.2 Rotator cuff   | 0.718665 | 0.918103 | 0.814419 | 0.00103  | 42638 | 500  | 42138 |
| 260.3 Adult failure  | 1.111255 | 1.778358 | 1.464229 | 0.001043 | 44747 | 26   | 44721 |
| 565.1 Anal and re    | 0.683304 | 0.90641  | 0.789472 | 0.001054 | 45344 | 400  | 44944 |
| 550.4 Umbilical h    | 0.693934 | 0.910447 | 0.797135 | 0.001076 | 45407 | 440  | 44967 |
| 367.8 Hypermetr      | 0.485299 | 0.829105 | 0.639358 | 0.001086 | 45727 | 129  | 45598 |
| 722.1 Displaceme     | 0.80188  | 0.945549 | 0.871885 | 0.001117 | 42888 | 1112 | 41776 |
| 300.12 Agorophob     | 1.066659 | 1.316103 | 1.190693 | 0.001137 | 36696 | 456  | 36240 |
| 370 Keratitis        | 0.621965 | 0.885632 | 0.74546  | 0.00114  | 43363 | 265  | 43098 |
| 695.4 Lupus (loca    | 1.091944 | 1.529283 | 1.319002 | 0.001198 | 43868 | 93   | 43775 |
| 447 Other disor      | 1.063204 | 1.303415 | 1.182862 | 0.001229 | 46053 | 390  | 45663 |
| 721.1 Spondylosis    | 0.852632 | 0.961198 | 0.90599  | 0.001246 | 43712 | 1936 | 41776 |
| 578.2 Blood in stc   | 0.774735 | 0.938647 | 0.854121 | 0.001289 | 43845 | 859  | 42986 |
| 327.32 Obstructive   | 1.027026 | 1.117967 | 1.071994 | 0.001317 | 43658 | 3378 | 40280 |
| 975 Poisoning b      | 1.097834 | 2.026094 | 1.604728 | 0.001347 | 45862 | 20   | 45842 |
| 427.11 Paroxysmal    | 1.060394 | 1.293231 | 1.175925 | 0.001379 | 39264 | 489  | 38775 |
| 157 Pancreatic c     | 1.095279 | 1.708217 | 1.422785 | 0.001394 | 46657 | 38   | 46619 |

|                     |          |          |          |          |       |      |       |
|---------------------|----------|----------|----------|----------|-------|------|-------|
| 851 Complicatio     | 1.095601 | 1.89128  | 1.531319 | 0.001406 | 46811 | 21   | 46790 |
| 361.1 Retinal deta  | 0.546872 | 0.860875 | 0.690682 | 0.001417 | 45600 | 166  | 45434 |
| 41.11 Methicillin : | 1.08647  | 1.489483 | 1.292079 | 0.001447 | 47305 | 146  | 47159 |
| 442 Other aneu      | 1.054265 | 1.262246 | 1.157343 | 0.001465 | 46212 | 549  | 45663 |
| 960.2 Allergy/adv   | 1.092845 | 1.561891 | 1.334867 | 0.001467 | 45941 | 99   | 45842 |
| 530.1 Esophagitis   | 0.906394 | 0.97684  | 0.941217 | 0.001511 | 44718 | 5494 | 39224 |
| 525.1 Loss of teet  | 0.419368 | 0.808123 | 0.588112 | 0.00155  | 45935 | 93   | 45842 |
| 577.1 Acute panc    | 1.073403 | 1.395664 | 1.236161 | 0.001561 | 48053 | 216  | 47837 |
| 795 Other and r     | 1.083407 | 1.881225 | 1.52578  | 0.001585 | 48215 | 21   | 48194 |
| 602 Other disor     | 0.580263 | 0.877185 | 0.717881 | 0.001698 | 41487 | 179  | 41308 |
| 430.2 Intracerebr   | 1.064122 | 1.340864 | 1.202992 | 0.001733 | 45251 | 284  | 44967 |
| 569 Other disor     | 1.038135 | 1.183446 | 1.110138 | 0.001774 | 46153 | 1209 | 44944 |
| 495 Asthma          | 1.032122 | 1.153942 | 1.092308 | 0.001922 | 44933 | 1923 | 43010 |
| 70.2 Viral hepati   | 1.062305 | 1.339005 | 1.200885 | 0.00195  | 41392 | 290  | 41102 |
| 327.7 Sleep relate  | 0.673863 | 0.91247  | 0.786885 | 0.001963 | 40637 | 357  | 40280 |
| 340.1 Migrain wit   | 0.533904 | 0.863754 | 0.683519 | 0.00197  | 46716 | 171  | 46545 |
| 709.2 Sicca syndr   | 1.080362 | 1.711184 | 1.420932 | 0.002045 | 44066 | 33   | 44033 |
| 345.1 Epilepsy      | 0.788501 | 0.9476   | 0.865606 | 0.002097 | 43271 | 1012 | 42259 |
| 742 Derangeme       | 0.748804 | 0.936263 | 0.839067 | 0.002098 | 44003 | 642  | 43361 |
| 871 Open woun       | 0.848464 | 0.963716 | 0.904978 | 0.002129 | 45187 | 1917 | 43270 |
| 285 Other anen      | 1.043424 | 1.222129 | 1.13186  | 0.002141 | 47207 | 789  | 46418 |
| 709.3 Systemic sc   | 1.078364 | 1.732509 | 1.433573 | 0.00215  | 44062 | 29   | 44033 |
| 293 Symptoms i      | 0.461322 | 0.836951 | 0.627094 | 0.002183 | 46740 | 108  | 46632 |
| 595 Hydroneph       | 0.720617 | 0.929141 | 0.820374 | 0.002282 | 46240 | 519  | 45721 |
| 593.1 Gross hema    | 0.685906 | 0.918622 | 0.796586 | 0.002307 | 44010 | 357  | 43653 |
| 312 Conduct dis     | 1.052239 | 1.285153 | 1.167296 | 0.002414 | 46663 | 540  | 46123 |
| 433 Cerebrovas      | 1.026328 | 1.131089 | 1.078108 | 0.002416 | 47350 | 2383 | 44967 |
| 447.1 Stricture of  | 1.079365 | 1.610721 | 1.357498 | 0.002423 | 45721 | 58   | 45663 |
| 386.1 Meniere's c   | 0.490395 | 0.851576 | 0.651978 | 0.002434 | 44175 | 120  | 44055 |
| 41.1 Staphylococ    | 1.063136 | 1.371875 | 1.217688 | 0.002502 | 47440 | 281  | 47159 |
| 568 Other disor     | 1.068484 | 1.437138 | 1.256147 | 0.002545 | 45095 | 151  | 44944 |
| 261.4 Vitamin D c   | 0.848093 | 0.965009 | 0.905421 | 0.002572 | 46428 | 1707 | 44721 |
| 593.2 Microscopi    | 0.703918 | 0.925801 | 0.809813 | 0.002575 | 44055 | 402  | 43653 |

|                     |          |          |          |          |       |      |       |
|---------------------|----------|----------|----------|----------|-------|------|-------|
| 930 Allergic rea    | 0.483252 | 0.851661 | 0.646672 | 0.00262  | 42874 | 126  | 42748 |
| 742.9 Other dera    | 0.712333 | 0.92876  | 0.815662 | 0.002635 | 43823 | 462  | 43361 |
| 560.1 Paralytic ile | 1.059456 | 1.356992 | 1.209155 | 0.002635 | 41184 | 227  | 40957 |
| 214.1 Lipoma of s   | 0.658097 | 0.912868 | 0.778226 | 0.002707 | 47551 | 305  | 47246 |
| 530.11 GERD         | 0.905993 | 0.979302 | 0.942218 | 0.002715 | 44229 | 5005 | 39224 |
| 427.8 Sinoatrial n  | 1.047837 | 1.266262 | 1.155508 | 0.002756 | 39323 | 548  | 38775 |
| 345.11 Generalizec  | 0.680798 | 0.921122 | 0.794333 | 0.002865 | 42667 | 408  | 42259 |
| 204.22 Myeloid leu  | 1.07608  | 1.709921 | 1.412716 | 0.002929 | 47180 | 47   | 47133 |
| 580.32 Nephritis ai | 1.077518 | 1.656947 | 1.381316 | 0.003034 | 44709 | 65   | 44644 |
| 526.4 Temporom:     | 0.409815 | 0.825777 | 0.588314 | 0.003067 | 45929 | 87   | 45842 |
| 764 Sciatica        | 0.743483 | 0.939593 | 0.837853 | 0.003082 | 45110 | 550  | 44560 |
| 609 Male infert     | 0.578463 | 0.89051  | 0.721969 | 0.003132 | 38993 | 190  | 38803 |
| 574.1 Cholelithias  | 1.04174  | 1.238672 | 1.139472 | 0.003138 | 47770 | 636  | 47134 |
| 260.2 severe prot   | 1.070851 | 1.75739  | 1.439151 | 0.003171 | 44751 | 30   | 44721 |
| 575.8 Other disor   | 1.068012 | 1.518612 | 1.299364 | 0.003507 | 47237 | 103  | 47134 |
| 960 Poisoning b     | 1.059217 | 1.403314 | 1.232057 | 0.003703 | 46054 | 212  | 45842 |
| 379.5 Disorders o   | 0.510067 | 0.871314 | 0.672355 | 0.003739 | 44240 | 121  | 44119 |
| 540 Appendicea      | 0.671329 | 0.923321 | 0.789953 | 0.003779 | 48265 | 376  | 47889 |
| 440.21 Atheroscler  | 1.048856 | 1.813139 | 1.468977 | 0.003783 | 45683 | 20   | 45663 |
| 710.12 Chronic ost  | 1.064134 | 1.547071 | 1.315869 | 0.003821 | 44764 | 77   | 44687 |
| 198.7 Secondary i   | 1.063121 | 1.612756 | 1.353364 | 0.003828 | 45140 | 51   | 45089 |
| 204.2 Myeloid leu   | 1.067616 | 1.555326 | 1.319006 | 0.003849 | 47224 | 91   | 47133 |
| 362.2 Degenerati    | 0.735396 | 0.940488 | 0.834051 | 0.003867 | 45761 | 473  | 45288 |
| 475.9 Postnasal d   | 0.655869 | 0.918903 | 0.779827 | 0.003902 | 37553 | 279  | 37274 |
| 509.2 Respiratory   | 1.063279 | 1.462473 | 1.264056 | 0.003996 | 43952 | 151  | 43801 |
| 362.26 Macular pu   | 0.580211 | 0.896529 | 0.726213 | 0.004029 | 45457 | 169  | 45288 |
| 275 Disorders o     | 1.034606 | 1.211299 | 1.122184 | 0.004178 | 47862 | 803  | 47059 |
| 288.1 Decreased i   | 0.652464 | 0.919876 | 0.777793 | 0.004182 | 44104 | 283  | 43821 |
| 513.8 Disorders o   | 1.061024 | 1.540184 | 1.309501 | 0.004358 | 47602 | 76   | 47526 |
| 523.31 Acute peric  | 0.465605 | 0.862343 | 0.639956 | 0.004628 | 45941 | 99   | 45842 |
| 967 Adverse eff     | 1.062959 | 1.54039  | 1.30703  | 0.004677 | 45951 | 109  | 45842 |
| 528 Diseases of     | 0.718079 | 0.93929  | 0.823671 | 0.004679 | 47381 | 454  | 46927 |
| 79 Viral infecti    | 0.777486 | 0.954059 | 0.862787 | 0.00474  | 41886 | 784  | 41102 |

|                     |          |          |          |          |       |      |       |
|---------------------|----------|----------|----------|----------|-------|------|-------|
| 704.1 Alopecia      | 0.577951 | 0.901226 | 0.725991 | 0.004798 | 46409 | 190  | 46219 |
| 441 Vascular ins    | 1.058742 | 1.602409 | 1.344079 | 0.00481  | 45725 | 62   | 45663 |
| 191.11 Cancer of b  | 1.049693 | 1.372782 | 1.212185 | 0.005017 | 47892 | 230  | 47662 |
| 343 Infantile ce    | 1.060559 | 1.540249 | 1.304901 | 0.005062 | 42365 | 106  | 42259 |
| 804 Fracture of     | 0.804935 | 0.962241 | 0.881381 | 0.005593 | 43895 | 1017 | 42878 |
| 573.6 Nonspecific   | 0.794955 | 0.960167 | 0.875005 | 0.005598 | 42816 | 918  | 41898 |
| 481 Influenza       | 0.69965  | 0.938002 | 0.812739 | 0.005619 | 42521 | 377  | 42144 |
| 426.8 Other cardi   | 1.050791 | 1.60256  | 1.340838 | 0.005774 | 38832 | 57   | 38775 |
| 286.8 Hypercoagu    | 1.054487 | 1.477397 | 1.268477 | 0.00579  | 45389 | 139  | 45250 |
| 519.9 Symptoms i    | 1.033024 | 1.231272 | 1.131397 | 0.00588  | 47219 | 611  | 46608 |
| 519 Other disea     | 1.031298 | 1.217709 | 1.123733 | 0.005954 | 47308 | 700  | 46608 |
| 523.3 Periodontit   | 0.5118   | 0.886747 | 0.679508 | 0.005976 | 45962 | 120  | 45842 |
| 771 Musculoske      | 1.039464 | 1.293606 | 1.165856 | 0.006028 | 46485 | 372  | 46113 |
| 555.2 Ulcerative c  | 1.039304 | 1.292966 | 1.165404 | 0.006082 | 41370 | 413  | 40957 |
| 395.2 Nonrheuma     | 1.034137 | 1.246652 | 1.139341 | 0.006228 | 46305 | 520  | 45785 |
| 740.3 Osteoarthr    | 1.052218 | 1.656266 | 1.366242 | 0.006255 | 42746 | 41   | 42705 |
| 710.11 Acute oste   | 1.047055 | 1.604925 | 1.341657 | 0.006434 | 44743 | 56   | 44687 |
| 772.4 Rhabdomyo     | 1.048647 | 1.467731 | 1.262523 | 0.006438 | 45928 | 109  | 45819 |
| 411.9 Other acute   | 1.048792 | 1.81141  | 1.450239 | 0.006483 | 41058 | 28   | 41030 |
| 433.2 Occlusion o   | 1.027953 | 1.198667 | 1.112474 | 0.006553 | 45779 | 812  | 44967 |
| 158 Neoplasm c      | 1.048141 | 1.550077 | 1.308607 | 0.006744 | 46693 | 74   | 46619 |
| 189.2 Cancer of b   | 1.038117 | 1.302407 | 1.169588 | 0.006784 | 47825 | 303  | 47522 |
| 289.5 Diseases of   | 1.052786 | 1.569804 | 1.316765 | 0.006908 | 43907 | 86   | 43821 |
| 588 Disorders r     | 1.047407 | 1.505967 | 1.283368 | 0.006976 | 44737 | 93   | 44644 |
| 771.2 Cramp of li   | 0.551663 | 0.903609 | 0.711554 | 0.006995 | 46253 | 140  | 46113 |
| 567 Peritonitis a   | 1.046589 | 1.513562 | 1.288163 | 0.007056 | 45036 | 92   | 44944 |
| 191.1 Cancer of b   | 1.041713 | 1.359026 | 1.200956 | 0.007059 | 47903 | 241  | 47662 |
| 594 Urinary calc    | 0.865617 | 0.976938 | 0.920277 | 0.007121 | 47762 | 2041 | 45721 |
| 735.23 Hallux rigid | 0.478259 | 0.882586 | 0.657018 | 0.007374 | 45654 | 96   | 45558 |
| 270 Disorders o     | 1.039256 | 1.340159 | 1.189822 | 0.007471 | 47534 | 241  | 47293 |
| 53.1 Herpes zost    | 0.278552 | 0.805217 | 0.484335 | 0.007653 | 41141 | 39   | 41102 |
| 282.5 Sickle cell a | 1.052835 | 1.888724 | 1.458416 | 0.007816 | 46440 | 22   | 46418 |
| 573.3 Hepatomeg     | 1.038759 | 1.664765 | 1.371632 | 0.007947 | 41948 | 50   | 41898 |

|                     |          |          |          |          |       |      |       |
|---------------------|----------|----------|----------|----------|-------|------|-------|
| 574 Cholelithias    | 1.026059 | 1.205801 | 1.115068 | 0.008214 | 47914 | 780  | 47134 |
| 201 Hodgkin's d     | 1.046996 | 1.536717 | 1.295942 | 0.008268 | 47242 | 109  | 47133 |
| 433.1 Occlusion a   | 1.024534 | 1.191924 | 1.10725  | 0.008314 | 45825 | 858  | 44967 |
| 842 Other sprai     | 0.504791 | 0.896259 | 0.678962 | 0.008381 | 42250 | 112  | 42138 |
| 728 Disorders o     | 0.589285 | 0.920731 | 0.741856 | 0.008878 | 40183 | 167  | 40016 |
| 315.3 Mental reta   | 1.037979 | 1.381029 | 1.210021 | 0.008911 | 46342 | 219  | 46123 |
| 353.2 Nerve root    | 0.573186 | 0.917488 | 0.730766 | 0.009128 | 45381 | 151  | 45230 |
| 54 Herpes sim       | 0.677481 | 0.942806 | 0.802539 | 0.009198 | 41394 | 292  | 41102 |
| 568.1 Peritoneal a  | 1.037923 | 1.45622  | 1.251645 | 0.009357 | 45058 | 114  | 44944 |
| 292.6 Hallucinatic  | 1.036723 | 1.374979 | 1.206175 | 0.009387 | 43991 | 205  | 43786 |
| 333.4 Torsion dys   | 0.522154 | 0.906144 | 0.694309 | 0.009669 | 42379 | 120  | 42259 |
| 575.2 Obstructior   | 1.022842 | 1.718767 | 1.397691 | 0.009703 | 47166 | 32   | 47134 |
| 210 Benign neo      | 0.566193 | 0.918179 | 0.726626 | 0.009793 | 47842 | 148  | 47694 |
| 380 Disorders o     | 0.472241 | 0.89243  | 0.656895 | 0.009873 | 45431 | 92   | 45339 |
| 575.7 Other disor   | 1.038517 | 1.468676 | 1.256492 | 0.01001  | 47262 | 128  | 47134 |
| 707.2 Chronic ulc   | 1.034801 | 1.395439 | 1.216968 | 0.010128 | 48059 | 156  | 47903 |
| 858 Complicatic     | 1.033052 | 1.335451 | 1.183632 | 0.010197 | 47058 | 268  | 46790 |
| 603.1 Hydrocele     | 0.631462 | 0.935293 | 0.772982 | 0.010344 | 39011 | 208  | 38803 |
| 8.52 Intestinal ir  | 1.011048 | 1.749515 | 1.413674 | 0.010926 | 47676 | 28   | 47648 |
| 433.21 Cerebral ar  | 1.021489 | 1.198513 | 1.10911  | 0.011112 | 45719 | 752  | 44967 |
| 471 Nasal polyp     | 0.65631  | 0.94271  | 0.790816 | 0.011234 | 37510 | 236  | 37274 |
| 224 Benign neo      | 0.520252 | 0.911398 | 0.695521 | 0.011364 | 47773 | 111  | 47662 |
| 701.6 Acquired ac   | 1.010051 | 1.743562 | 1.402571 | 0.011372 | 45748 | 27   | 45721 |
| 870.3 Other open    | 1.020322 | 1.188147 | 1.103311 | 0.011423 | 44263 | 993  | 43270 |
| 681.5 Cellulitis an | 1.023603 | 1.234448 | 1.12825  | 0.011644 | 43763 | 557  | 43206 |
| 530 Diseases of     | 0.920574 | 0.989445 | 0.954631 | 0.011648 | 45089 | 5865 | 39224 |
| 191 Malignant a     | 1.028635 | 1.314328 | 1.171085 | 0.011719 | 47971 | 309  | 47662 |
| 286.81 Primary hyp  | 1.034411 | 1.487479 | 1.2638   | 0.011769 | 45373 | 123  | 45250 |
| 331.1 Hydroceph     | 1.031883 | 1.382425 | 1.207077 | 0.011844 | 42459 | 200  | 42259 |
| 389.2 Conductive    | 0.689001 | 0.951047 | 0.812886 | 0.011898 | 44543 | 320  | 44223 |
| 853 Complicatic     | 1.014828 | 1.747761 | 1.406727 | 0.012088 | 46819 | 29   | 46790 |
| 733.9 Chondrom      | 0.551187 | 0.923095 | 0.71973  | 0.012663 | 44552 | 129  | 44423 |
| 500.2 Pneumocor     | 1.00477  | 1.741318 | 1.399659 | 0.013425 | 43829 | 28   | 43801 |

|                     |          |          |          |          |       |      |       |
|---------------------|----------|----------|----------|----------|-------|------|-------|
| 313.1 Attention d   | 0.781222 | 0.970835 | 0.872505 | 0.013973 | 46923 | 800  | 46123 |
| 250.1 Type 1 diab   | 0.81374  | 0.975628 | 0.892505 | 0.014082 | 40840 | 910  | 39930 |
| 327.71 Restless leg | 0.665671 | 0.950854 | 0.799593 | 0.0141   | 40532 | 252  | 40280 |
| 709.6 Other speci   | 1.014892 | 1.620303 | 1.336361 | 0.014182 | 44080 | 47   | 44033 |
| 430 Intracranial    | 1.020761 | 1.240951 | 1.130045 | 0.014256 | 45463 | 496  | 44967 |
| 250.23 Type 2 diab  | 0.628841 | 0.943739 | 0.775525 | 0.014336 | 40115 | 185  | 39930 |
| 224.1 Benign neo    | 0.433619 | 0.898953 | 0.633773 | 0.014568 | 47733 | 71   | 47662 |
| 715 Other inflar    | 0.693613 | 0.956874 | 0.818169 | 0.014665 | 44932 | 317  | 44615 |
| 110.13 Dermatoph    | 0.613641 | 0.942275 | 0.765435 | 0.014792 | 45250 | 182  | 45068 |
| 603 Other disor     | 0.704482 | 0.95957  | 0.825566 | 0.015195 | 39127 | 324  | 38803 |
| 170.1 Bone cance    | 1.018953 | 1.547248 | 1.293866 | 0.015381 | 48187 | 64   | 48123 |
| 334.2 Anterior ho   | 1.021192 | 1.550319 | 1.292575 | 0.015645 | 42327 | 68   | 42259 |
| 255.21 Glucocortic  | 1.02079  | 1.498701 | 1.266872 | 0.015817 | 44877 | 92   | 44785 |
| 260.6 Anorexia      | 1.014167 | 1.619625 | 1.331486 | 0.015837 | 44768 | 47   | 44721 |
| 536.8 Dyspepsia a   | 0.770492 | 0.971243 | 0.867169 | 0.015946 | 46383 | 580  | 45803 |
| 870.6 Open woun     | 1.016884 | 1.519656 | 1.277233 | 0.01641  | 43349 | 79   | 43270 |
| 204.21 Myeloid leu  | 1.017944 | 1.559513 | 1.297333 | 0.016904 | 47207 | 74   | 47133 |
| 987 Toxic effect    | 0.99857  | 1.698008 | 1.375552 | 0.016922 | 48053 | 36   | 48017 |
| 292.4 Altered me    | 1.014609 | 1.180601 | 1.096678 | 0.017033 | 44743 | 957  | 43786 |
| 524 Dentofacial     | 0.615238 | 0.948685 | 0.768616 | 0.017481 | 46040 | 198  | 45842 |
| 694.1 Vitiligo      | 0.249627 | 0.849987 | 0.474054 | 0.017504 | 44234 | 30   | 44204 |
| 836 Traumatic a     | 1.013488 | 1.539298 | 1.287446 | 0.017585 | 45308 | 65   | 45243 |
| 362.6 Peripheral i  | 0.458114 | 0.91826  | 0.657683 | 0.018593 | 45362 | 74   | 45288 |
| 875 Non-healin      | 0.985714 | 1.707542 | 1.378661 | 0.018751 | 43297 | 27   | 43270 |
| 701.4 Keloid scar   | 0.547205 | 0.938589 | 0.723476 | 0.019049 | 45834 | 113  | 45721 |
| 720 Spinal stenc    | 0.839388 | 0.983496 | 0.909847 | 0.019479 | 42851 | 1075 | 41776 |
| 736.6 Unequal leg   | 0.238399 | 0.856953 | 0.466167 | 0.020035 | 45586 | 28   | 45558 |
| 451 Phlebitis an    | 1.016    | 1.359007 | 1.187682 | 0.020811 | 43325 | 197  | 43128 |
| 189.21 Malignant r  | 1.014245 | 1.281977 | 1.147146 | 0.021695 | 47820 | 298  | 47522 |
| 716.9 Arthropath    | 1.010718 | 1.181489 | 1.095234 | 0.022423 | 45502 | 815  | 44687 |
| 560.4 Other intes   | 1.01339  | 1.334011 | 1.173763 | 0.022705 | 41185 | 228  | 40957 |
| 112 Candidiasis     | 1.012805 | 1.338432 | 1.175906 | 0.023066 | 45280 | 212  | 45068 |
| 514.2 Solitary pul  | 1.011842 | 1.256903 | 1.133557 | 0.023658 | 47308 | 383  | 46925 |

|                     |          |          |          |          |       |      |       |
|---------------------|----------|----------|----------|----------|-------|------|-------|
| 733.8 Malunion a    | 1.011549 | 1.351478 | 1.181526 | 0.024465 | 44632 | 209  | 44423 |
| 530.7 Gastroesop    | 0.174497 | 0.853997 | 0.40057  | 0.024806 | 39244 | 20   | 39224 |
| 530.15 Eosinophilic | 0.457859 | 0.936818 | 0.6634   | 0.025141 | 39307 | 83   | 39224 |
| 345 Epilepsy, re    | 1.006727 | 1.124372 | 1.064831 | 0.025905 | 44389 | 2130 | 42259 |
| 609.2 Abnormal s    | 0.478191 | 0.940248 | 0.680223 | 0.026079 | 38878 | 75   | 38803 |
| 528.7 Sialolithiasi | 0.212264 | 0.871303 | 0.446521 | 0.026113 | 46950 | 23   | 46927 |
| 240 Simple and      | 0.650526 | 0.967478 | 0.798209 | 0.026362 | 45012 | 198  | 44814 |
| 870.4 Open woun     | 1.000034 | 1.50746  | 1.262105 | 0.026414 | 43351 | 81   | 43270 |
| 521 Diseases of     | 0.788347 | 0.983202 | 0.882411 | 0.026579 | 46471 | 629  | 45842 |
| 198.1 Secondary i   | 1.009276 | 1.262089 | 1.134785 | 0.026813 | 45467 | 378  | 45089 |
| 364 Corneal opa     | 0.693879 | 0.973146 | 0.825839 | 0.026889 | 45693 | 259  | 45434 |
| 370.3 Keratoconji   | 0.584012 | 0.958847 | 0.755384 | 0.027018 | 43226 | 128  | 43098 |
| 331 Other cerek     | 1.009092 | 1.258383 | 1.132382 | 0.027481 | 42642 | 383  | 42259 |
| 931 Contact der     | 0.534856 | 0.953272 | 0.721847 | 0.027587 | 42854 | 106  | 42748 |
| 379.4 Anomalies c   | 0.973215 | 1.714257 | 1.369143 | 0.027709 | 44151 | 32   | 44119 |
| 261.2 Vitamin B-c   | 1.008101 | 1.246557 | 1.1264   | 0.028198 | 45130 | 409  | 44721 |
| 706.1 Acne          | 0.743266 | 0.981531 | 0.856484 | 0.029156 | 45076 | 507  | 44569 |
| 594.1 Calculus of   | 0.867514 | 0.991635 | 0.92837  | 0.029408 | 47367 | 1646 | 45721 |
| 339 Other head      | 0.602813 | 0.966551 | 0.769366 | 0.02994  | 46696 | 151  | 46545 |
| 292.2 Mild cognit   | 0.593098 | 0.965774 | 0.76411  | 0.031089 | 43917 | 131  | 43786 |
| 717 Polymyalgia     | 0.998625 | 1.442096 | 1.223391 | 0.031551 | 48260 | 95   | 48165 |
| 626 Disorders o     | 0.241655 | 0.907047 | 0.482786 | 0.031928 | 48280 | 28   | 48252 |
| 442.2 Aneurysm c    | 0.955165 | 1.746886 | 1.378    | 0.03215  | 45686 | 23   | 45663 |
| 524.3 Anomalies c   | 0.618119 | 0.971915 | 0.780349 | 0.032181 | 46023 | 181  | 45842 |
| 850 Hemorrhag       | 1.004286 | 1.335897 | 1.169156 | 0.032253 | 47006 | 216  | 46790 |
| 735.2 Acquired tc   | 0.691058 | 0.979276 | 0.827167 | 0.033232 | 45799 | 241  | 45558 |
| 290 Delirium de     | 1.004648 | 1.22786  | 1.115045 | 0.033462 | 44231 | 445  | 43786 |
| 696.42 Psoriatic ar | 1.00422  | 1.273293 | 1.137734 | 0.033482 | 43719 | 354  | 43365 |
| 350.2 Abnormalit    | 0.801536 | 0.988861 | 0.892349 | 0.03367  | 46780 | 616  | 46164 |
| 362.8 Retinal hen   | 0.395404 | 0.94249  | 0.623398 | 0.033868 | 45335 | 47   | 45288 |
| 530.3 Stricture an  | 0.690598 | 0.98027  | 0.827022 | 0.03389  | 39477 | 253  | 39224 |
| 521.1 Dental carie  | 0.791544 | 0.988846 | 0.886792 | 0.03454  | 46457 | 615  | 45842 |
| 263 Other nutri     | 0.330397 | 0.934742 | 0.569817 | 0.034986 | 44756 | 35   | 44721 |

|                      |          |          |          |          |       |     |       |
|----------------------|----------|----------|----------|----------|-------|-----|-------|
| 588.1 Renal osteo    | 0.986432 | 1.513293 | 1.257975 | 0.035739 | 44713 | 69  | 44644 |
| 526.41 Temporom      | 0.302071 | 0.931402 | 0.545332 | 0.03584  | 45877 | 35  | 45842 |
| 727.8 Plica syndr    | 0.509057 | 0.963708 | 0.709865 | 0.036103 | 40102 | 86  | 40016 |
| 285.2 Anemia of c    | 0.977041 | 1.586176 | 1.294471 | 0.036511 | 46466 | 48  | 46418 |
| 288.11 Neutropeni    | 0.593293 | 0.974991 | 0.766747 | 0.03655  | 43958 | 137 | 43821 |
| 710 Osteomyeli       | 1.001349 | 1.286475 | 1.143267 | 0.036652 | 44974 | 287 | 44687 |
| 370.31 Keratoconju   | 0.561919 | 0.97245  | 0.747694 | 0.03838  | 43202 | 104 | 43098 |
| 609.1 Infertility, n | 0.555211 | 0.973483 | 0.742572 | 0.038408 | 38918 | 115 | 38803 |
| 579.8 Nonspecific    | 0.593577 | 0.976519 | 0.768345 | 0.038621 | 43120 | 134 | 42986 |
| 172.1 Melanoma       | 0.798503 | 0.991562 | 0.892036 | 0.038828 | 44023 | 596 | 43427 |
| 966 Poisoning b      | 0.982072 | 1.54834  | 1.272108 | 0.03886  | 45916 | 74  | 45842 |
| 686.1 Carbuncle a    | 0.697617 | 0.985276 | 0.833364 | 0.038927 | 43468 | 262 | 43206 |
| 601.8 Other inflar   | 0.986011 | 1.478118 | 1.237737 | 0.039627 | 41395 | 87  | 41308 |
| 270.33 Amyloidosi    | 0.939148 | 1.723347 | 1.366116 | 0.039809 | 47318 | 25  | 47293 |
| 586.3 Vascular dis   | 0.947979 | 1.715877 | 1.359834 | 0.039986 | 44673 | 29  | 44644 |
| 696 Psoriasis an     | 1.00139  | 1.184086 | 1.091686 | 0.040348 | 44150 | 785 | 43365 |
| 368 Visual distu     | 0.840902 | 0.994757 | 0.915965 | 0.04071  | 47232 | 994 | 46238 |
| 411.41 Aneurysm a    | 0.967373 | 1.654809 | 1.322182 | 0.04099  | 41073 | 43  | 41030 |
| 454 Varicose ve      | 0.727095 | 0.990343 | 0.852063 | 0.042628 | 43460 | 332 | 43128 |
| 480.3 Pneumonia      | 0.930906 | 1.730093 | 1.366102 | 0.043957 | 42167 | 23  | 42144 |
| 750 Digestive cc     | 0.579738 | 0.982263 | 0.762042 | 0.044101 | 47547 | 124 | 47423 |
| 696.4 Psoriasis      | 0.999642 | 1.185147 | 1.091313 | 0.044391 | 44127 | 762 | 43365 |
| 726.4 Calcaneal sp   | 0.727389 | 0.991338 | 0.853207 | 0.044869 | 40311 | 295 | 40016 |
| 279 Disorders ir     | 0.999435 | 1.180131 | 1.088781 | 0.044991 | 47605 | 736 | 46869 |
| 349 Other and t      | 0.990364 | 1.391404 | 1.190652 | 0.044999 | 42403 | 144 | 42259 |
| 500 Lung diseas      | 0.98465  | 1.480967 | 1.233575 | 0.045172 | 43901 | 100 | 43801 |
| 870.2 Open woun      | 0.979254 | 1.500611 | 1.244899 | 0.045313 | 43364 | 94  | 43270 |
| 362.4 Retinal vasc   | 0.64441  | 0.987467 | 0.804082 | 0.045864 | 45445 | 157 | 45288 |
| 364.5 Corneal dys    | 0.473207 | 0.974673 | 0.691413 | 0.046421 | 45496 | 62  | 45434 |
| 332 Parkinson's      | 0.732276 | 0.992991 | 0.856688 | 0.046885 | 42566 | 307 | 42259 |
| 8.5 Bacterial er     | 0.95101  | 1.640987 | 1.316573 | 0.047435 | 47688 | 40  | 47648 |
| 353.1 Nerve plexu    | 0.963745 | 1.560803 | 1.274973 | 0.048264 | 45285 | 55  | 45230 |
| 213 Benign neo       | 0.583591 | 0.98928  | 0.767564 | 0.050262 | 42098 | 118 | 41980 |



|                     |          |          |          |          |       |      |       |
|---------------------|----------|----------|----------|----------|-------|------|-------|
| 580.3 Nephritis a   | 0.982079 | 1.427316 | 1.206281 | 0.05058  | 44764 | 120  | 44644 |
| 164 Cancer of ir    | 0.932593 | 1.692339 | 1.341536 | 0.050669 | 48043 | 31   | 48012 |
| 426.23 Second deg   | 0.977748 | 1.460481 | 1.221891 | 0.050701 | 38869 | 94   | 38775 |
| 110.2 Dermatomy     | 0.527023 | 0.9873   | 0.730792 | 0.051204 | 45153 | 85   | 45068 |
| 350 Abnormal r      | 0.867032 | 0.999365 | 0.93189  | 0.05167  | 47529 | 1365 | 46164 |
| 324 Other CNS i     | 0.960952 | 1.556699 | 1.269927 | 0.05291  | 48036 | 59   | 47977 |
| 586.1 Anatomical    | 0.90504  | 1.816957 | 1.401136 | 0.053375 | 44665 | 21   | 44644 |
| 362.22 Macular de   | 0.490533 | 0.985285 | 0.708492 | 0.05419  | 45353 | 65   | 45288 |
| 789.1 Persistent v  | 0.925254 | 1.678943 | 1.32843  | 0.054476 | 44368 | 29   | 44339 |
| 259.2 Carcinoid sy  | 0.931463 | 1.663997 | 1.323824 | 0.055124 | 44814 | 29   | 44785 |
| 170 Cancer of b     | 0.984694 | 1.346734 | 1.165691 | 0.055851 | 48293 | 170  | 48123 |
| 527 Diseases of     | 0.651504 | 0.997063 | 0.812205 | 0.056099 | 47097 | 170  | 46927 |
| 573.7 Abnormal r    | 0.877632 | 1.000797 | 0.938029 | 0.056291 | 43668 | 1770 | 41898 |
| 701.2 Scar conditi  | 0.720194 | 0.999056 | 0.852531 | 0.056565 | 46003 | 282  | 45721 |
| 259 Other endo      | 0.666345 | 0.9983   | 0.821202 | 0.056824 | 44984 | 199  | 44785 |
| 513.31 Apnea        | 0.920919 | 1.725049 | 1.352106 | 0.057069 | 47551 | 25   | 47526 |
| 716 Other arthr     | 0.99569  | 1.159632 | 1.076732 | 0.05739  | 45577 | 890  | 44687 |
| 599.6 Oliguria and  | 0.926079 | 1.668998 | 1.325547 | 0.057759 | 42386 | 27   | 42359 |
| 949 Allergies, of   | 0.668203 | 0.999163 | 0.822577 | 0.057774 | 42939 | 191  | 42748 |
| 578.1 Hemateme      | 0.976821 | 1.415242 | 1.196874 | 0.05856  | 43117 | 131  | 42986 |
| 292.3 Memory lo     | 0.810543 | 1.001339 | 0.90311  | 0.059065 | 44408 | 622  | 43786 |
| 196 Radiotherap     | 0.979727 | 1.366697 | 1.174097 | 0.059573 | 45226 | 137  | 45089 |
| 727.6 Rupture of    | 0.767111 | 1.001559 | 0.879946 | 0.060559 | 40386 | 370  | 40016 |
| 362.7 Hereditary    | 0.447552 | 0.995112 | 0.680772 | 0.06075  | 45343 | 55   | 45288 |
| 705.8 Hyperhidro    | 0.67926  | 1.001635 | 0.830073 | 0.060838 | 44779 | 210  | 44569 |
| 70.9 Hepatitis N    | 0.988183 | 1.266333 | 1.126255 | 0.060884 | 41402 | 300  | 41102 |
| 741.4 Joint effusio | 0.843273 | 1.002441 | 0.92092  | 0.061963 | 44288 | 927  | 43361 |
| 736.2 Acquired de   | 0.562368 | 1.000716 | 0.759247 | 0.062116 | 45657 | 99   | 45558 |
| 172.22 Squamous c   | 0.666945 | 1.002258 | 0.823969 | 0.063118 | 43598 | 171  | 43427 |
| 958.2 Traumatic a   | 0.970608 | 1.433174 | 1.204088 | 0.063332 | 48216 | 112  | 48104 |
| 451.2 Phlebitis an  | 0.975768 | 1.38662  | 1.181763 | 0.063781 | 43263 | 135  | 43128 |
| 741.3 Difficulty in | 0.727814 | 1.003793 | 0.859076 | 0.064584 | 43635 | 274  | 43361 |
| 204.4 Multiple m    | 0.967737 | 1.456634 | 1.21401  | 0.064679 | 47223 | 90   | 47133 |

|                     |          |          |          |          |       |      |       |
|---------------------|----------|----------|----------|----------|-------|------|-------|
| 351 Other perip     | 0.865144 | 1.002971 | 0.932678 | 0.06472  | 46487 | 1257 | 45230 |
| 686.4 Pyogenic gr   | 0.24612  | 0.996081 | 0.51512  | 0.065082 | 43228 | 22   | 43206 |
| 347 Cataplexy a     | 0.371173 | 1.004887 | 0.625763 | 0.066696 | 42302 | 43   | 42259 |
| 496.3 Bronchiect    | 0.975174 | 1.37958  | 1.176614 | 0.067347 | 43154 | 144  | 43010 |
| 705.3 Hidradeniti   | 0.932894 | 1.602362 | 1.2855   | 0.068025 | 44607 | 38   | 44569 |
| 599.1 Urinary obs   | 0.652981 | 1.00594  | 0.817491 | 0.068488 | 42515 | 156  | 42359 |
| 202.21 Nodular lyn  | 0.534031 | 1.008761 | 0.743745 | 0.069116 | 47218 | 85   | 47133 |
| 592.2 Urethritis a  | 0.647493 | 1.007768 | 0.813943 | 0.069148 | 43809 | 156  | 43653 |
| 512.3 Abnormal c    | 0.365609 | 1.008759 | 0.622887 | 0.06916  | 33072 | 36   | 33036 |
| 300.1 Anxiety disc  | 0.91343  | 1.003005 | 0.957615 | 0.069603 | 39872 | 3632 | 36240 |
| 736 Other acqu      | 0.688658 | 1.008107 | 0.838481 | 0.070749 | 45770 | 212  | 45558 |
| 704.11 Alopecia Ar  | 0.386062 | 1.012762 | 0.640799 | 0.072368 | 46259 | 40   | 46219 |
| 358 Myoneural       | 0.949113 | 1.509036 | 1.237372 | 0.072737 | 46581 | 62   | 46519 |
| 750.1 Upper gastri  | 0.418516 | 1.012229 | 0.66571  | 0.072746 | 47471 | 48   | 47423 |
| 202 Cancer of o     | 0.985969 | 1.238017 | 1.109916 | 0.073131 | 47550 | 417  | 47133 |
| 580.14 Chronic glo  | 0.891146 | 1.749777 | 1.356247 | 0.073161 | 44667 | 23   | 44644 |
| 586.2 Cyst of kidn  | 0.989092 | 1.191845 | 1.089034 | 0.073279 | 45255 | 611  | 44644 |
| 172.3 Carcinoma     | 0.56609  | 1.010768 | 0.766646 | 0.073591 | 43518 | 91   | 43427 |
| 604 Disorders o     | 0.743095 | 1.008595 | 0.869813 | 0.074114 | 39097 | 294  | 38803 |
| 536 Disorders o     | 0.811609 | 1.007191 | 0.90627  | 0.074289 | 46438 | 635  | 45803 |
| 306 Other ment      | 0.978231 | 1.311059 | 1.143108 | 0.074364 | 36474 | 234  | 36240 |
| 337 Disorders o     | 0.626664 | 1.012455 | 0.804096 | 0.07586  | 42398 | 139  | 42259 |
| 709.7 Unspecifiec   | 0.892834 | 1.714674 | 1.338412 | 0.076058 | 44057 | 24   | 44033 |
| 253.3 Diabetes in   | 0.882487 | 1.756607 | 1.359141 | 0.076128 | 44809 | 24   | 44785 |
| 703 Diseases of     | 0.602086 | 1.012936 | 0.789666 | 0.07637  | 46334 | 115  | 46219 |
| 327.41 Organic or   | 0.677893 | 1.01263  | 0.834164 | 0.077284 | 40474 | 194  | 40280 |
| 473.1 Chronic lary  | 0.606124 | 1.012916 | 0.792633 | 0.077348 | 37385 | 111  | 37274 |
| 327.1 Hypersomn     | 0.651834 | 1.014046 | 0.81932  | 0.077962 | 40447 | 167  | 40280 |
| 575.1 Cholangitis   | 0.9081   | 1.702925 | 1.327199 | 0.077965 | 47167 | 33   | 47134 |
| 962.2 Insulins anc  | 0.242018 | 1.026041 | 0.519461 | 0.078031 | 45863 | 21   | 45842 |
| 735.1 Flat foot     | 0.542828 | 1.016665 | 0.753433 | 0.078426 | 45641 | 83   | 45558 |
| 578.9 Hemorrhag     | 0.980289 | 1.266075 | 1.121791 | 0.079106 | 43282 | 296  | 42986 |
| 279.11 Deficiency c | 0.942004 | 1.517672 | 1.238925 | 0.079921 | 46931 | 62   | 46869 |

|        |              |          |          |          |          |       |      |       |
|--------|--------------|----------|----------|----------|----------|-------|------|-------|
| 348.8  | Encephalop   | 0.978247 | 1.28539  | 1.12986  | 0.080516 | 42527 | 268  | 42259 |
| 743.21 | Pathologic f | 0.946868 | 1.486885 | 1.223404 | 0.081447 | 47029 | 70   | 46959 |
| 770    | Myalgia and  | 0.864912 | 1.007276 | 0.934605 | 0.082073 | 47377 | 1207 | 46170 |
| 446.9  | Arteritis NC | 0.926804 | 1.585905 | 1.269595 | 0.083004 | 45710 | 47   | 45663 |
| 285.21 | Anemia in c  | 0.913295 | 1.638348 | 1.294851 | 0.083069 | 46450 | 32   | 46418 |
| 227.3  | Benign neo   | 0.960826 | 1.401182 | 1.182158 | 0.083974 | 47855 | 118  | 47737 |
| 818.1  | Subdural he  | 0.971134 | 1.330034 | 1.149413 | 0.084078 | 45886 | 195  | 45691 |
| 740.2  | Osteoarthro  | 0.98425  | 1.206258 | 1.093512 | 0.085095 | 43164 | 459  | 42705 |
| 807    | Fracture of  | 0.988413 | 1.155934 | 1.071138 | 0.085569 | 43829 | 951  | 42878 |
| 275.5  | Disorders o  | 0.977932 | 1.26074  | 1.117754 | 0.086664 | 47361 | 302  | 47059 |
| 159.2  | Malignant r  | 0.903394 | 1.650646 | 1.300399 | 0.086896 | 46650 | 31   | 46619 |
| 723    | Other disor  | 0.723366 | 1.015743 | 0.861944 | 0.087002 | 42029 | 253  | 41776 |
| 350.1  | Abnormal ii  | 0.792853 | 1.012439 | 0.898668 | 0.087126 | 46656 | 492  | 46164 |
| 401.21 | Hypertensi   | 0.866459 | 1.009003 | 0.936249 | 0.09011  | 30645 | 1124 | 29521 |
| 454.1  | Varicose ve  | 0.655422 | 1.021229 | 0.825037 | 0.090217 | 43285 | 157  | 43128 |
| 706.8  | Other speci  | 0.573555 | 1.025121 | 0.777326 | 0.09067  | 44662 | 93   | 44569 |
| 300.3  | Obsessive-c  | 0.651388 | 1.023675 | 0.822746 | 0.091769 | 36425 | 185  | 36240 |
| 743.13 | Other speci  | 0.963691 | 1.349787 | 1.156635 | 0.091813 | 47107 | 148  | 46959 |
| 697    | Sarcoidosis  | 0.970547 | 1.301335 | 1.134977 | 0.091865 | 44410 | 206  | 44204 |
| 731    | Osteitis def | 0.893457 | 1.647953 | 1.295828 | 0.095042 | 44449 | 26   | 44423 |
| 754.2  | Spondylolis  | 0.573476 | 1.03217  | 0.779594 | 0.09844  | 47830 | 94   | 47736 |
| 189.4  | Malignant r  | 0.960423 | 1.34955  | 1.154786 | 0.098551 | 47662 | 140  | 47522 |
| 601.3  | Orchitis and | 0.757922 | 1.018969 | 0.882533 | 0.098592 | 41652 | 344  | 41308 |
| 728.1  | Muscular cr  | 0.903577 | 1.597424 | 1.270288 | 0.098792 | 40048 | 32   | 40016 |
| 743.12 | Senile osteo | 0.532856 | 1.034852 | 0.75514  | 0.099211 | 47034 | 75   | 46959 |
| 798.1  | Chronic fati | 0.658985 | 1.02652  | 0.829537 | 0.099668 | 36143 | 158  | 35985 |
| 376    | Disorders o  | 0.901035 | 1.64073  | 1.287059 | 0.100052 | 44154 | 35   | 44119 |
| 724.2  | Disorders o  | 0.373477 | 1.051499 | 0.64638  | 0.101293 | 41812 | 36   | 41776 |
| 334.1  | Spinocereb   | 0.490675 | 1.041611 | 0.728877 | 0.101679 | 42319 | 60   | 42259 |
| 345.3  | Convulsion:  | 0.988818 | 1.118352 | 1.052706 | 0.102027 | 44000 | 1741 | 42259 |
| 170.2  | Cancer of c  | 0.95653  | 1.364401 | 1.160433 | 0.102393 | 48255 | 132  | 48123 |
| 255.11 | Cushing's sy | 0.883881 | 1.675555 | 1.304542 | 0.102798 | 44815 | 30   | 44785 |
| 279.1  | Immunity d   | 0.983108 | 1.167665 | 1.074234 | 0.103087 | 47572 | 703  | 46869 |

|                      |          |          |          |          |       |      |       |
|----------------------|----------|----------|----------|----------|-------|------|-------|
| 215 Other benign     | 0.610827 | 1.032727 | 0.803263 | 0.103526 | 47362 | 116  | 47246 |
| 656 Other perin      | 0.89916  | 1.62934  | 1.276903 | 0.104835 | 48280 | 49   | 48231 |
| 681.7 Cellulitis an  | 0.972634 | 1.246046 | 1.107857 | 0.105998 | 43533 | 327  | 43206 |
| 913 Toxic effect     | 0.635418 | 1.033029 | 0.817904 | 0.106329 | 47083 | 142  | 46941 |
| 130.1 Lyme disea     | 0.244844 | 1.078187 | 0.539628 | 0.106571 | 47806 | 20   | 47786 |
| 270.38 Other speci   | 0.874289 | 1.686138 | 1.307994 | 0.106801 | 47315 | 22   | 47293 |
| 782.6 Pallor and f   | 0.531958 | 1.04422  | 0.757496 | 0.108596 | 45746 | 79   | 45667 |
| 312.3 Impulse cor    | 0.946988 | 1.406272 | 1.176373 | 0.108688 | 46256 | 133  | 46123 |
| 278.3 Localized ac   | 0.880799 | 1.671525 | 1.294877 | 0.114186 | 42817 | 31   | 42786 |
| 520.2 Disturbanc     | 0.704974 | 1.031356 | 0.857601 | 0.114703 | 46095 | 253  | 45842 |
| 604.3 Peyronie's c   | 0.646646 | 1.035213 | 0.826912 | 0.114954 | 38931 | 128  | 38803 |
| 189.12 Malignant r   | 0.909269 | 1.546491 | 1.237819 | 0.116505 | 47566 | 44   | 47522 |
| 994.1 Systemic in    | 0.935417 | 1.449037 | 1.192958 | 0.117188 | 48226 | 93   | 48133 |
| 411.3 Angina pect    | 0.983432 | 1.143761 | 1.062171 | 0.117577 | 42084 | 1054 | 41030 |
| 512.1 Wheezing       | 0.979349 | 1.173712 | 1.074964 | 0.117914 | 33728 | 692  | 33036 |
| 253 Disorders o      | 0.96967  | 1.240215 | 1.10319  | 0.118773 | 45144 | 359  | 44785 |
| 800.2 Fracture of    | 0.944344 | 1.385864 | 1.165852 | 0.119034 | 42998 | 120  | 42878 |
| 528.41 Cyst of the   | 0.254901 | 1.100236 | 0.555605 | 0.119254 | 46948 | 21   | 46927 |
| 202.24 Large cell ly | 0.897425 | 1.608762 | 1.26414  | 0.119297 | 47177 | 44   | 47133 |
| 303.3 Psychogeni     | 0.4676   | 1.062558 | 0.720302 | 0.119871 | 36294 | 54   | 36240 |
| 695 Erythematc       | 0.826997 | 1.019317 | 0.920407 | 0.120396 | 44829 | 625  | 44204 |
| 769 Nonallopatl      | 0.866578 | 1.675862 | 1.297633 | 0.120632 | 48318 | 26   | 48292 |
| 528.6 Leukoplakia    | 0.327728 | 1.082553 | 0.620769 | 0.121673 | 46953 | 26   | 46927 |
| 754 Congenital       | 0.647504 | 1.040658 | 0.828689 | 0.121997 | 47879 | 143  | 47736 |
| 300 Anxiety, ph      | 0.991456 | 1.071531 | 1.031052 | 0.122735 | 41183 | 4943 | 36240 |
| 313 Pervasive d      | 0.83869  | 1.019336 | 0.926248 | 0.12404  | 47063 | 940  | 46123 |
| 752.2 Other speci    | 0.918865 | 1.501678 | 1.21417  | 0.125373 | 47968 | 74   | 47894 |
| 334.21 Amyotroph     | 0.910448 | 1.529215 | 1.224532 | 0.126855 | 42310 | 51   | 42259 |
| 396 Abnormal h       | 0.971784 | 1.210185 | 1.089369 | 0.126889 | 46202 | 417  | 45785 |
| 722.8 Postlamine     | 0.953583 | 1.321047 | 1.135677 | 0.12737  | 41942 | 166  | 41776 |
| 381.9 Otorrhea       | 0.55845  | 1.055719 | 0.779836 | 0.128082 | 43911 | 82   | 43829 |
| 90 Sexually tra      | 0.775576 | 1.027779 | 0.896355 | 0.128497 | 48189 | 349  | 47840 |
| 315.2 Speech and     | 0.882339 | 1.605497 | 1.260345 | 0.129363 | 46165 | 42   | 46123 |

|        |                |          |          |          |          |       |      |       |
|--------|----------------|----------|----------|----------|----------|-------|------|-------|
| 270.32 | Paraproteir    | 0.94344  | 1.368903 | 1.155404 | 0.130335 | 47407 | 114  | 47293 |
| 737    | Curvature c    | 0.759549 | 1.030802 | 0.88879  | 0.131044 | 45897 | 339  | 45558 |
| 711    | Arthropath     | 0.925307 | 1.452893 | 1.191477 | 0.131454 | 44772 | 85   | 44687 |
| 626.8  | Infertility, f | 0.278165 | 1.117777 | 0.582264 | 0.131664 | 48275 | 23   | 48252 |
| 377.1  | Optic atrop    | 0.551883 | 1.05849  | 0.777338 | 0.131831 | 44183 | 64   | 44119 |
| 414.2  | ASCVD          | 0.966521 | 1.241603 | 1.100998 | 0.132829 | 41365 | 335  | 41030 |
| 288.3  | Eosinophili    | 0.938374 | 1.407607 | 1.169458 | 0.133071 | 43940 | 119  | 43821 |
| 457    | Encounter f    | 0.972592 | 1.194133 | 1.081735 | 0.133925 | 43604 | 476  | 43128 |
| 477    | Epistaxis or   | 0.760837 | 1.031077 | 0.890167 | 0.13438  | 37561 | 287  | 37274 |
| 720.1  | Spinal stenc   | 0.841669 | 1.020736 | 0.928946 | 0.134516 | 42469 | 693  | 41776 |
| 430.1  | Subarachnc     | 0.947035 | 1.340219 | 1.142666 | 0.134525 | 45120 | 153  | 44967 |
| 225.1  | Benign neo     | 0.677631 | 1.043276 | 0.847808 | 0.135085 | 47832 | 170  | 47662 |
| 363.3  | Chorioretin    | 0.546854 | 1.061056 | 0.775621 | 0.135533 | 45504 | 70   | 45434 |
| 241.1  | Nontoxic ur    | 0.767636 | 1.030872 | 0.893598 | 0.135564 | 45137 | 323  | 44814 |
| 300.13 | Phobia         | 0.828838 | 1.728018 | 1.317598 | 0.137048 | 36260 | 20   | 36240 |
| 289.4  | Lymphader      | 0.980227 | 1.14154  | 1.059467 | 0.137439 | 44904 | 1083 | 43821 |
| 261    | Vitamin def    | 0.903681 | 1.013196 | 0.957603 | 0.137774 | 46760 | 2039 | 44721 |
| 801    | Fracture of    | 0.851284 | 1.020572 | 0.933805 | 0.139203 | 43778 | 900  | 42878 |
| 362.31 | Separation     | 0.466304 | 1.080866 | 0.727459 | 0.14119  | 45336 | 48   | 45288 |
| 368.2  | Diplopia an    | 0.752252 | 1.035097 | 0.886978 | 0.141653 | 46516 | 278  | 46238 |
| 596    | Other disor    | 0.972424 | 1.1824   | 1.075911 | 0.142867 | 47209 | 530  | 46679 |
| 737.3  | Kyphoscolic    | 0.731271 | 1.039529 | 0.876863 | 0.144214 | 45817 | 259  | 45558 |
| 251.1  | Hypoglycen     | 0.683165 | 1.04672  | 0.852597 | 0.144569 | 37865 | 171  | 37694 |
| 358.1  | Myasthenia     | 0.893932 | 1.535015 | 1.224108 | 0.145306 | 46566 | 47   | 46519 |
| 711.1  | Pyogenic ar    | 0.86487  | 1.629123 | 1.264742 | 0.149371 | 44723 | 36   | 44687 |
| 323.8  | Encephaliti    | 0.89634  | 1.526742 | 1.218376 | 0.150443 | 48032 | 55   | 47977 |
| 520    | Disorders o    | 0.720732 | 1.04429  | 0.872575 | 0.151027 | 46102 | 260  | 45842 |
| 350.6  | Disturbanc     | 0.527375 | 1.078421 | 0.769228 | 0.153401 | 46229 | 65   | 46164 |
| 199    | Neoplasm c     | 0.876336 | 1.019387 | 0.946426 | 0.153701 | 46287 | 1198 | 45089 |
| 990    | Effects radi   | 0.923312 | 1.406899 | 1.165093 | 0.157834 | 48051 | 91   | 47960 |
| 527.7  | Disturbanc     | 0.543038 | 1.078494 | 0.78022  | 0.159236 | 46993 | 66   | 46927 |
| 378.1  | Strabismus     | 0.664067 | 1.05811  | 0.846277 | 0.161797 | 44264 | 145  | 44119 |
| 703.1  | Ingrowing r    | 0.7197   | 1.047513 | 0.874267 | 0.161867 | 46425 | 206  | 46219 |

|                      |          |          |          |          |       |     |       |
|----------------------|----------|----------|----------|----------|-------|-----|-------|
| 728.2 Laxity of lig  | 0.358374 | 1.12959  | 0.66077  | 0.162    | 40045 | 29  | 40016 |
| 227 Benign neo       | 0.952544 | 1.264281 | 1.106522 | 0.16261  | 47982 | 245 | 47737 |
| 117 Mycoses          | 0.934637 | 1.34606  | 1.139446 | 0.163402 | 45201 | 133 | 45068 |
| 250.11 Type 1 diab   | 0.556701 | 1.084232 | 0.788724 | 0.166173 | 40014 | 84  | 39930 |
| 695.8 Other speci    | 0.872059 | 1.56412  | 1.230604 | 0.167539 | 44245 | 41  | 44204 |
| 519.2 Respiratory    | 0.880977 | 1.53708  | 1.218321 | 0.168894 | 46655 | 47  | 46608 |
| 295.2 Paranoid di    | 0.705041 | 1.053562 | 0.868112 | 0.169069 | 36440 | 200 | 36240 |
| 363 Chorioretin      | 0.689047 | 1.055666 | 0.86093  | 0.170576 | 45583 | 149 | 45434 |
| 250.24 Type 2 diab   | 0.968756 | 1.17077  | 1.068443 | 0.171024 | 40483 | 553 | 39930 |
| 454.11 Varicose ve   | 0.661524 | 1.063505 | 0.847438 | 0.173594 | 43261 | 133 | 43128 |
| 803.21 Colles' fract | 0.573685 | 1.082474 | 0.801259 | 0.174278 | 42959 | 81  | 42878 |
| 550.5 Ventral her    | 0.706852 | 1.054446 | 0.870151 | 0.174278 | 45146 | 179 | 44967 |
| 817 Concussion       | 0.966058 | 1.183756 | 1.072863 | 0.175538 | 46315 | 624 | 45691 |
| 733.6 Costochonc     | 0.483257 | 1.110485 | 0.748991 | 0.177142 | 44476 | 53  | 44423 |
| 557.1 Celiac disea   | 0.541828 | 1.09483  | 0.784429 | 0.179119 | 41029 | 72  | 40957 |
| 872 Traumatic a      | 0.634353 | 1.072034 | 0.834768 | 0.179695 | 43381 | 111 | 43270 |
| 225 Benign neo       | 0.701747 | 1.058463 | 0.86875  | 0.181214 | 47845 | 183 | 47662 |
| 429.9 Cardiac con    | 0.917049 | 1.401257 | 1.156792 | 0.182081 | 44527 | 108 | 44419 |
| 473.3 Paralysis/sp   | 0.619291 | 1.074868 | 0.827929 | 0.182121 | 37368 | 94  | 37274 |
| 561 Symptoms         | 0.737677 | 1.05132  | 0.886299 | 0.183097 | 41190 | 233 | 40957 |
| 323 Encephaliti      | 0.901286 | 1.451604 | 1.177537 | 0.183737 | 48055 | 78  | 47977 |
| 362.21 Macular de    | 0.643302 | 1.069591 | 0.841131 | 0.184435 | 45389 | 101 | 45288 |
| 733.4 Aseptic nec    | 0.913496 | 1.400444 | 1.156776 | 0.18528  | 44518 | 95  | 44423 |
| 264.1 Short statu    | 0.451882 | 1.138907 | 0.73099  | 0.187394 | 44778 | 57  | 44721 |
| 735.3 Hallux valg    | 0.65521  | 1.070677 | 0.847259 | 0.187973 | 45671 | 113 | 45558 |
| 456 Chronic ver      | 0.93271  | 1.319425 | 1.124128 | 0.18851  | 43277 | 149 | 43128 |
| 250.22 Type 2 diab   | 0.954452 | 1.219908 | 1.085545 | 0.190666 | 40226 | 296 | 39930 |
| 599.8 Other symp     | 0.572253 | 1.090477 | 0.805351 | 0.191478 | 42427 | 68  | 42359 |
| 596.5 Functional     | 0.943515 | 1.269697 | 1.104433 | 0.191489 | 46896 | 217 | 46679 |
| 733.2 Cyst of bon    | 0.532573 | 1.104204 | 0.782829 | 0.191547 | 44486 | 63  | 44423 |
| 655 Known or s       | 0.285478 | 1.197815 | 0.615901 | 0.19167  | 48299 | 20  | 48279 |
| 772.6 Facial weak    | 0.652763 | 1.073491 | 0.84689  | 0.19263  | 45938 | 119 | 45819 |
| 264 Lack of nori     | 0.91687  | 1.385718 | 1.146652 | 0.196828 | 44878 | 157 | 44721 |

|                    |          |          |          |          |       |      |       |
|--------------------|----------|----------|----------|----------|-------|------|-------|
| 759 Other and t    | 0.948738 | 1.24348  | 1.093183 | 0.198108 | 47504 | 295  | 47209 |
| 352 Disorders o    | 0.788855 | 1.044914 | 0.911828 | 0.199015 | 45591 | 361  | 45230 |
| 597.1 Urethral str | 0.927312 | 1.327471 | 1.12537  | 0.199447 | 46818 | 139  | 46679 |
| 342 Hemiplegia     | 0.950035 | 1.233751 | 1.08939  | 0.200147 | 42566 | 307  | 42259 |
| 962 Poisoning b    | 0.88824  | 1.472125 | 1.179859 | 0.20512  | 45914 | 72   | 45842 |
| 250.6 Polyneurop   | 0.955739 | 1.199879 | 1.076242 | 0.206255 | 40302 | 372  | 39930 |
| 229 Benign neo     | 0.488322 | 1.127819 | 0.761799 | 0.207028 | 48278 | 46   | 48232 |
| 772 Symptoms       | 0.929364 | 1.309211 | 1.117071 | 0.208129 | 45989 | 170  | 45819 |
| 599.7 Urethral dis | 0.531573 | 1.116579 | 0.786405 | 0.208949 | 42411 | 52   | 42359 |
| 333.3 Tics and ch  | 0.803368 | 1.716653 | 1.278281 | 0.209617 | 42285 | 26   | 42259 |
| 368.91 Psychophys  | 0.87239  | 1.510524 | 1.193869 | 0.211034 | 46292 | 54   | 46238 |
| 590 Pyelonephr     | 0.871701 | 1.500998 | 1.191491 | 0.211403 | 43703 | 50   | 43653 |
| 458.1 Orthostatic  | 0.934863 | 1.284688 | 1.107142 | 0.211557 | 47052 | 194  | 46858 |
| 286.12 Congenital  | 0.797706 | 1.742866 | 1.288463 | 0.212706 | 45275 | 25   | 45250 |
| 443.8 Other speci  | 0.875636 | 1.487186 | 1.185093 | 0.213098 | 45716 | 53   | 45663 |
| 327.5 Parasomnia   | 0.626797 | 1.09133  | 0.838495 | 0.215368 | 40376 | 96   | 40280 |
| 742.2 Pathologica  | 0.885426 | 1.476039 | 1.176511 | 0.217604 | 43439 | 78   | 43361 |
| 199.4 Neurofibroi  | 0.77744  | 1.733397 | 1.287902 | 0.220082 | 45110 | 21   | 45089 |
| 752 Nervous sy     | 0.903759 | 1.396456 | 1.147158 | 0.220977 | 48009 | 115  | 47894 |
| 356 Hereditary     | 0.96899  | 1.133371 | 1.05005  | 0.222103 | 47415 | 896  | 46519 |
| 592 Cystitis and   | 0.778686 | 1.053118 | 0.910054 | 0.22221  | 43941 | 288  | 43653 |
| 242.2 Toxic multi  | 0.858243 | 1.531955 | 1.200434 | 0.222455 | 44857 | 43   | 44814 |
| 612 Breast conc    | 0.678151 | 1.080245 | 0.864558 | 0.222533 | 47994 | 136  | 47858 |
| 612.2 Hypertroph   | 0.678151 | 1.080245 | 0.864558 | 0.222533 | 47994 | 136  | 47858 |
| 457.2 Encounter f  | 0.857902 | 1.525555 | 1.19844  | 0.222749 | 43172 | 44   | 43128 |
| 721.8 Other alliec | 0.560492 | 1.114191 | 0.806807 | 0.224306 | 41837 | 61   | 41776 |
| 526.3 Anomalies    | 0.507018 | 1.137487 | 0.776576 | 0.224643 | 45898 | 56   | 45842 |
| 420.1 Myocarditis  | 0.407836 | 1.18239  | 0.71664  | 0.224899 | 46890 | 35   | 46855 |
| 803 Fracture of    | 0.881216 | 1.028437 | 0.953299 | 0.225242 | 44121 | 1243 | 42878 |
| 211 Benign neo     | 0.747575 | 1.06301  | 0.897315 | 0.2291   | 47433 | 231  | 47202 |
| 362.27 Drusen (de) | 0.583727 | 1.106953 | 0.820458 | 0.229108 | 45355 | 67   | 45288 |
| 536.3 Gastropare   | 0.858288 | 1.52097  | 1.194813 | 0.229281 | 45851 | 48   | 45803 |
| 246 Other disor    | 0.733585 | 1.066934 | 0.891122 | 0.229291 | 45016 | 202  | 44814 |

|                     |          |          |          |          |       |     |       |
|---------------------|----------|----------|----------|----------|-------|-----|-------|
| 977 Personal hi     | 0.309404 | 1.236282 | 0.653551 | 0.236158 | 45863 | 21  | 45842 |
| 187.8 Neoplasm c    | 0.397625 | 1.184653 | 0.715934 | 0.236735 | 46634 | 29  | 46605 |
| 526 Diseases of     | 0.779957 | 1.057044 | 0.912391 | 0.23831  | 46159 | 317 | 45842 |
| 303.4 Somatoforr    | 0.903645 | 1.373264 | 1.135498 | 0.238342 | 36365 | 125 | 36240 |
| 369.2 Eye infectic  | 0.59497  | 1.111938 | 0.827781 | 0.239446 | 43174 | 76  | 43098 |
| 724.1 Disorders o   | 0.459313 | 1.16124  | 0.754819 | 0.240088 | 41815 | 39  | 41776 |
| 313.3 Autism        | 0.888794 | 1.426971 | 1.153592 | 0.241508 | 46238 | 115 | 46123 |
| 117.1 Histoplasm    | 0.886393 | 1.416382 | 1.151855 | 0.241846 | 45142 | 74  | 45068 |
| 574.2 Calculus of   | 0.872135 | 1.471607 | 1.170952 | 0.243143 | 47198 | 64  | 47134 |
| 876 Posttrauma      | 0.804183 | 1.637166 | 1.239285 | 0.243153 | 43300 | 30  | 43270 |
| 381.3 Mastoiditis   | 0.853306 | 1.514317 | 1.188569 | 0.244163 | 43877 | 48  | 43829 |
| 293.1 Swelling, m   | 0.862513 | 1.036317 | 0.94731  | 0.248233 | 47437 | 805 | 46632 |
| 980 Encounter f     | 0.916235 | 1.320899 | 1.114478 | 0.248571 | 48213 | 166 | 48047 |
| 355.1 Chronic pai   | 0.928779 | 1.269352 | 1.096695 | 0.248967 | 45439 | 209 | 45230 |
| 727.2 Bursitis disc | 0.578039 | 1.121058 | 0.821997 | 0.250133 | 40081 | 65  | 40016 |
| 560.3 Peritoneal c  | 0.798521 | 1.635828 | 1.236586 | 0.251453 | 40983 | 26  | 40957 |
| 522 Diseases of     | 0.908799 | 1.336644 | 1.12028  | 0.2521   | 45978 | 136 | 45842 |
| 859 Complicatic     | 0.923414 | 1.288533 | 1.102564 | 0.252844 | 46974 | 184 | 46790 |
| 440.1 Atheroscler   | 0.885108 | 1.410665 | 1.147109 | 0.252882 | 45738 | 75  | 45663 |
| 270.2 Disorders o   | 0.323785 | 1.247319 | 0.670228 | 0.253203 | 47313 | 20  | 47293 |
| 277.51 Lipoprotein  | 0.441171 | 1.179645 | 0.748132 | 0.253751 | 47431 | 36  | 47395 |
| 362.29 Macular de   | 0.679297 | 1.089276 | 0.871274 | 0.254852 | 45401 | 113 | 45288 |
| 202.2 Non-Hodgk     | 0.944845 | 1.210695 | 1.074844 | 0.255052 | 47507 | 374 | 47133 |
| 681.3 Cellulitis an | 0.799521 | 1.055339 | 0.922447 | 0.255456 | 43580 | 374 | 43206 |
| 574.3 Cholecystiti  | 0.912696 | 1.319596 | 1.112877 | 0.258787 | 47283 | 149 | 47134 |
| 250.14 Type 1 diab  | 0.651446 | 1.101388 | 0.858789 | 0.25889  | 40036 | 106 | 39930 |
| 379.9 Pain, swelli  | 0.727042 | 1.079017 | 0.892706 | 0.261608 | 44299 | 180 | 44119 |
| 272.9 Unspecifec    | 0.602997 | 1.118511 | 0.83681  | 0.26183  | 31829 | 72  | 31757 |
| 528.5 Diseases of   | 0.503741 | 1.161031 | 0.786173 | 0.264014 | 46971 | 44  | 46927 |
| 275.1 Disorders o   | 0.93143  | 1.248153 | 1.08707  | 0.265461 | 47313 | 254 | 47059 |
| 246.7 Abnormal r    | 0.690942 | 1.09235  | 0.877572 | 0.265902 | 44959 | 145 | 44814 |
| 253.2 Pituitary hy  | 0.863395 | 1.46151  | 1.163208 | 0.266586 | 44850 | 65  | 44785 |
| 531.1 Hemorrhag     | 0.774942 | 1.675621 | 1.246562 | 0.268569 | 47358 | 21  | 47337 |



|                     |          |          |          |          |       |      |       |
|---------------------|----------|----------|----------|----------|-------|------|-------|
| 613 Other nonn      | 0.504297 | 1.162674 | 0.788324 | 0.269763 | 48277 | 44   | 48233 |
| 528.4 Cysts of ora  | 0.337878 | 1.255902 | 0.687134 | 0.270891 | 46950 | 23   | 46927 |
| 304 Adjustment      | 0.858338 | 1.040917 | 0.947241 | 0.271143 | 37029 | 789  | 36240 |
| 292 Neurologic      | 0.976892 | 1.083165 | 1.029404 | 0.271397 | 46117 | 2331 | 43786 |
| 531.2 Gastric ulce  | 0.886781 | 1.386589 | 1.134823 | 0.272184 | 47428 | 91   | 47337 |
| 202.22 Reticulosar  | 0.861765 | 1.470347 | 1.163894 | 0.272988 | 47197 | 64   | 47133 |
| 153.3 Malignant r   | 0.928051 | 1.251896 | 1.087485 | 0.274193 | 43065 | 221  | 42844 |
| 334 Degenerati      | 0.934198 | 1.232129 | 1.080183 | 0.276164 | 42540 | 281  | 42259 |
| 292.11 Aphasia      | 0.919725 | 1.271721 | 1.093286 | 0.283087 | 43973 | 187  | 43786 |
| 562.2 Diverticuliti | 0.799125 | 1.061046 | 0.92518  | 0.283377 | 41293 | 336  | 40957 |
| 535.1 Acute gastr   | 0.643832 | 1.117372 | 0.860278 | 0.287689 | 45903 | 100  | 45803 |
| 426.21 First degree | 0.883738 | 1.38293  | 1.130382 | 0.288345 | 38869 | 94   | 38775 |
| 705 Disorders o     | 0.893356 | 1.349622 | 1.119032 | 0.289401 | 44673 | 104  | 44569 |
| 696.41 Psoriasis vu | 0.950139 | 1.168022 | 1.057281 | 0.291081 | 43907 | 542  | 43365 |
| 333 Extrapynam      | 0.848517 | 1.046809 | 0.945019 | 0.291801 | 42864 | 605  | 42259 |
| 364.51 Fuchs' dysti | 0.506684 | 1.172402 | 0.796689 | 0.294166 | 45473 | 39   | 45434 |
| 149.4 Cancer of la  | 0.926792 | 1.241634 | 1.0815   | 0.295238 | 47922 | 228  | 47694 |
| 172.11 Melanomas    | 0.83292  | 1.052425 | 0.939417 | 0.295698 | 43902 | 475  | 43427 |
| 574.11 Cholelithias | 0.554939 | 1.16003  | 0.82052  | 0.297401 | 47195 | 61   | 47134 |
| 729 Other disor     | 0.663772 | 1.113574 | 0.871691 | 0.3014   | 40124 | 108  | 40016 |
| 149.5 Hx of malig   | 0.618249 | 1.13392  | 0.852579 | 0.306404 | 47773 | 79   | 47694 |
| 352.1 Trigeminal    | 0.734606 | 1.089103 | 0.902035 | 0.306732 | 45413 | 183  | 45230 |
| 743.1 Osteoporos    | 0.940555 | 1.188596 | 1.062532 | 0.310668 | 47340 | 381  | 46959 |
| 756.21 Pectus exca  | 0.385196 | 1.271969 | 0.73182  | 0.313528 | 47765 | 29   | 47736 |
| 41.9 Infection w    | 0.86891  | 1.413819 | 1.134807 | 0.314431 | 47253 | 94   | 47159 |
| 426.25 Other heart  | 0.777147 | 1.624439 | 1.213349 | 0.314509 | 38802 | 27   | 38775 |
| 527.2 Sialoadeniti  | 0.634774 | 1.131197 | 0.86167  | 0.316076 | 47012 | 85   | 46927 |
| 907 Injuries to t   | 0.784679 | 1.073696 | 0.922794 | 0.316559 | 48160 | 293  | 47867 |
| 401.2 Hypertensin   | 0.969084 | 1.097618 | 1.032263 | 0.317446 | 31042 | 1521 | 29521 |
| 447.7 Aortic ectas  | 0.928479 | 1.219983 | 1.071668 | 0.321798 | 45937 | 274  | 45663 |
| 750.2 Lower gastr   | 0.606719 | 1.147617 | 0.850166 | 0.322334 | 47499 | 76   | 47423 |
| 388 Other disor     | 0.800661 | 1.556302 | 1.186113 | 0.322363 | 44257 | 34   | 44223 |
| 284 Aplastic anc    | 0.820307 | 1.541437 | 1.176148 | 0.323669 | 46467 | 49   | 46418 |

|                    |          |          |          |          |       |      |       |
|--------------------|----------|----------|----------|----------|-------|------|-------|
| 338.1 Acute pain   | 0.963258 | 1.11267  | 1.036899 | 0.324943 | 46490 | 1171 | 45319 |
| 611 Abnormal f     | 0.667326 | 1.1219   | 0.877012 | 0.325138 | 47964 | 106  | 47858 |
| 550.6 Incisional h | 0.909073 | 1.277606 | 1.089546 | 0.325381 | 45139 | 172  | 44967 |
| 803.2 Fracture of  | 0.841255 | 1.054868 | 0.94482  | 0.326247 | 43457 | 579  | 42878 |
| 698 Pruritus an    | 0.78723  | 1.075185 | 0.9251   | 0.328951 | 47855 | 281  | 47574 |
| 132 Infestation    | 0.803545 | 1.549006 | 1.177334 | 0.338224 | 47826 | 40   | 47786 |
| 749 Congenital     | 0.563197 | 1.180414 | 0.833494 | 0.339717 | 48219 | 65   | 48154 |
| 603.2 Spermatoce   | 0.687266 | 1.117988 | 0.887754 | 0.340492 | 38922 | 119  | 38803 |
| 245.21 Chronic lym | 0.650569 | 1.135782 | 0.872455 | 0.340576 | 44913 | 99   | 44814 |
| 250.5 Glycosuria c | 0.803186 | 1.529899 | 1.173036 | 0.340629 | 39970 | 40   | 39930 |
| 526.9 Jaw disease  | 0.838923 | 1.452563 | 1.144988 | 0.341291 | 45901 | 59   | 45842 |
| 429.3 Symptoms i   | 0.934242 | 1.195553 | 1.061703 | 0.342433 | 44809 | 390  | 44419 |
| 286.1 Congenital   | 0.856564 | 1.431818 | 1.134103 | 0.343682 | 45341 | 91   | 45250 |
| 287.4 Qualitative  | 0.709628 | 1.773766 | 1.256012 | 0.3455   | 45270 | 20   | 45250 |
| 255.1 Adrenal hyp  | 0.881028 | 1.338842 | 1.106861 | 0.34594  | 44892 | 107  | 44785 |
| 364.4 Corneal deg  | 0.681202 | 1.123432 | 0.886165 | 0.346764 | 45544 | 110  | 45434 |
| 362.23 Cystoid ma  | 0.710789 | 1.11007  | 0.898618 | 0.349819 | 45417 | 129  | 45288 |
| 701.1 Keratoderm   | 0.691184 | 1.119354 | 0.891059 | 0.351106 | 45833 | 112  | 45721 |
| 450 Noninfectic    | 0.868578 | 1.367966 | 1.115317 | 0.35116  | 48290 | 89   | 48201 |
| 300.4 Dysthymic c  | 0.935078 | 1.185991 | 1.058097 | 0.352892 | 36668 | 428  | 36240 |
| 739 Contracture    | 0.706034 | 1.114933 | 0.896932 | 0.353302 | 45693 | 135  | 45558 |
| 372 Disorders o    | 0.777887 | 1.084057 | 0.924414 | 0.354764 | 43321 | 223  | 43098 |
| 425.12 Other hype  | 0.823881 | 1.490272 | 1.152955 | 0.354851 | 46906 | 51   | 46855 |
| 418.1 Precordial p | 0.824903 | 1.066202 | 0.941457 | 0.357684 | 35314 | 393  | 34921 |
| 519.8 Other disea  | 0.729285 | 1.671191 | 1.219435 | 0.359617 | 46630 | 22   | 46608 |
| 589 Abnormal r     | 0.583794 | 1.178541 | 0.84802  | 0.362531 | 44700 | 56   | 44644 |
| 383 Otosclerosi    | 0.417108 | 1.277317 | 0.768313 | 0.365419 | 43855 | 26   | 43829 |
| 364.2 Corneal ede  | 0.551834 | 1.193536 | 0.835351 | 0.366571 | 45482 | 48   | 45434 |
| 278.4 Abnormal v   | 0.939538 | 1.16668  | 1.050806 | 0.37047  | 43304 | 518  | 42786 |
| 530.14 Reflux esop | 0.81284  | 1.073915 | 0.938313 | 0.371183 | 39589 | 365  | 39224 |
| 781 Symptoms i     | 0.894481 | 1.285453 | 1.086018 | 0.375632 | 47634 | 163  | 47471 |
| 724.8 Other symp   | 0.644197 | 1.151892 | 0.876238 | 0.376555 | 41864 | 88   | 41776 |
| 384 Other disor    | 0.72968  | 1.111607 | 0.909241 | 0.37792  | 43994 | 165  | 43829 |

|        |               |          |          |          |          |       |     |       |
|--------|---------------|----------|----------|----------|----------|-------|-----|-------|
| 601.4  | Balanopost    | 0.616965 | 1.166103 | 0.865518 | 0.378249 | 41376 | 68  | 41308 |
| 245.1  | Thyroiditis,  | 0.363943 | 1.333121 | 0.742046 | 0.378839 | 44834 | 20  | 44814 |
| 385.5  | Tympanosc     | 0.834452 | 1.431201 | 1.130243 | 0.380755 | 43892 | 63  | 43829 |
| 781.1  | Loss of heig  | 0.787777 | 1.543175 | 1.165918 | 0.381612 | 47512 | 41  | 47471 |
| 202.23 | Lymphosari    | 0.838693 | 1.429529 | 1.127759 | 0.38431  | 47203 | 70  | 47133 |
| 264.3  | Delayed mi    | 0.383057 | 1.344241 | 0.751952 | 0.385968 | 44749 | 28  | 44721 |
| 741.5  | Hemarthro:    | 0.441004 | 1.281187 | 0.786856 | 0.386692 | 43389 | 28  | 43361 |
| 599.2  | Retention c   | 0.85934  | 1.056351 | 0.955443 | 0.387309 | 42940 | 581 | 42359 |
| 250.3  | Insulin pum   | 0.860601 | 1.055998 | 0.955852 | 0.387692 | 40559 | 629 | 39930 |
| 495.2  | Asthma wit    | 0.932812 | 1.178223 | 1.052913 | 0.387743 | 43431 | 421 | 43010 |
| 112.3  | Candidiasis   | 0.524553 | 1.221571 | 0.828422 | 0.389781 | 45110 | 42  | 45068 |
| 277.5  | Other disor   | 0.857137 | 1.367041 | 1.107933 | 0.394676 | 47487 | 92  | 47395 |
| 426.22 | Mobitz II A\  | 0.775251 | 1.561371 | 1.168417 | 0.394873 | 38807 | 32  | 38775 |
| 695.7  | Prurigo and   | 0.685547 | 1.137583 | 0.895922 | 0.398229 | 44305 | 101 | 44204 |
| 597.2  | Urinary con   | 0.594619 | 1.187103 | 0.8608   | 0.400429 | 46739 | 60  | 46679 |
| 253.5  | Pituitary dv  | 0.781782 | 1.576303 | 1.165737 | 0.402506 | 44839 | 54  | 44785 |
| 370.2  | Superficial l | 0.472317 | 1.261506 | 0.808528 | 0.404153 | 43125 | 27  | 43098 |
| 242    | Thyrotoxicc   | 0.924616 | 1.192128 | 1.055628 | 0.404967 | 45163 | 349 | 44814 |
| 252.2  | Hypoparath    | 0.441947 | 1.287252 | 0.793681 | 0.406759 | 44813 | 28  | 44785 |
| 580.12 | Non-prolife   | 0.453368 | 1.294287 | 0.798176 | 0.40777  | 44674 | 30  | 44644 |
| 575.6  | Cholesterol   | 0.811157 | 1.47765  | 1.13744  | 0.407888 | 47190 | 56  | 47134 |
| 594.2  | Calculus of   | 0.875577 | 1.314387 | 1.089558 | 0.410833 | 45841 | 120 | 45721 |
| 242.3  | Exophthalrn   | 0.819075 | 1.445255 | 1.128414 | 0.412261 | 44871 | 57  | 44814 |
| 742.1  | Loose body    | 0.534759 | 1.233021 | 0.838195 | 0.41377  | 43405 | 44  | 43361 |
| 722.7  | Interverteb   | 0.725265 | 1.123166 | 0.912441 | 0.413848 | 41914 | 138 | 41776 |
| 790    | Nonspecific   | 0.712629 | 1.130659 | 0.907835 | 0.41421  | 45355 | 129 | 45226 |
| 738    | Other acqu    | 0.833924 | 1.072111 | 0.949223 | 0.417064 | 45979 | 421 | 45558 |
| 264.9  | Lack of nori  | 0.816543 | 1.461959 | 1.130447 | 0.417607 | 44801 | 80  | 44721 |
| 384.4  | Perforation   | 0.716435 | 1.129923 | 0.909886 | 0.419175 | 43970 | 141 | 43829 |
| 574.12 | Cholelithias  | 0.905017 | 1.236275 | 1.066693 | 0.419212 | 47367 | 233 | 47134 |
| 275.53 | Disorders o   | 0.762447 | 1.561788 | 1.163187 | 0.419517 | 47091 | 32  | 47059 |
| 748    | Anomalies (   | 0.748447 | 1.585601 | 1.17028  | 0.423138 | 48185 | 31  | 48154 |
| 531.4  | Peptic ulcer  | 0.888862 | 1.271477 | 1.076269 | 0.423798 | 47494 | 157 | 47337 |

|                     |          |          |          |          |       |      |       |
|---------------------|----------|----------|----------|----------|-------|------|-------|
| 573.9 Abnormal s    | 0.922438 | 1.190602 | 1.053529 | 0.424551 | 42265 | 367  | 41898 |
| 53 Herpes zost      | 0.79383  | 1.092138 | 0.936962 | 0.42518  | 41354 | 252  | 41102 |
| 255.13 Medulloadr   | 0.43489  | 1.305016 | 0.796097 | 0.426433 | 44809 | 24   | 44785 |
| 480.5 Bronchopni    | 0.728307 | 1.623613 | 1.181399 | 0.427933 | 42169 | 25   | 42144 |
| 611.3 Lump or ma    | 0.679697 | 1.151996 | 0.89818  | 0.428364 | 47957 | 99   | 47858 |
| 353 Nerve root      | 0.776616 | 1.102169 | 0.932089 | 0.432742 | 45446 | 216  | 45230 |
| 362.9 Retinal ede   | 0.709516 | 1.136554 | 0.909736 | 0.434193 | 45404 | 116  | 45288 |
| 695.2 Bullous der   | 0.738641 | 1.585362 | 1.168111 | 0.435464 | 44229 | 25   | 44204 |
| 250.12 Type 1 diab  | 0.585538 | 1.210428 | 0.864113 | 0.43646  | 39989 | 59   | 39930 |
| 253.4 Anterior pit  | 0.889819 | 1.262087 | 1.072074 | 0.437834 | 44962 | 177  | 44785 |
| 528.3 Cellulitis an | 0.809107 | 1.44543  | 1.123996 | 0.43802  | 46983 | 56   | 46927 |
| 860 Bone marrc      | 0.82545  | 1.414488 | 1.112983 | 0.443052 | 48323 | 77   | 48246 |
| 374.2 Lagophthal    | 0.416347 | 1.332524 | 0.792646 | 0.44358  | 43120 | 22   | 43098 |
| 512.2 Painful resp  | 0.939442 | 1.143902 | 1.039274 | 0.443785 | 33697 | 661  | 33036 |
| 732 Osteochon       | 0.667769 | 1.166198 | 0.896437 | 0.446088 | 44519 | 96   | 44423 |
| 743 Osteoporos      | 0.953049 | 1.109041 | 1.029892 | 0.446578 | 47974 | 1015 | 46959 |
| 377 Disorders o     | 0.776751 | 1.106057 | 0.933666 | 0.44814  | 44324 | 205  | 44119 |
| 701.5 Abnormal g    | 0.610971 | 1.19958  | 0.876566 | 0.449261 | 45784 | 63   | 45721 |
| 433.8 Late effects  | 0.931182 | 1.159324 | 1.043172 | 0.450401 | 45405 | 438  | 44967 |
| 530.12 Ulcer of esc | 0.791991 | 1.480835 | 1.130402 | 0.450445 | 39269 | 45   | 39224 |
| 726.2 Synoviopat    | 0.668377 | 1.163684 | 0.897946 | 0.450627 | 40102 | 86   | 40016 |
| 362.3 Other nond    | 0.753133 | 1.118552 | 0.926679 | 0.452604 | 45446 | 158  | 45288 |
| 259.3 Delay in se   | 0.680527 | 1.715221 | 1.200102 | 0.45295  | 44811 | 26   | 44785 |
| 465.4 Acute laryn   | 0.560404 | 1.233416 | 0.858062 | 0.453355 | 36998 | 46   | 36952 |
| 281 Other defic     | 0.890489 | 1.25471  | 1.067816 | 0.455548 | 46600 | 182  | 46418 |
| 259.1 Nonspecific   | 0.72508  | 1.135474 | 0.917809 | 0.456196 | 44926 | 141  | 44785 |
| 290.11 Alzheimer's  | 0.736005 | 1.127893 | 0.92179  | 0.456648 | 43918 | 132  | 43786 |
| 333.8 Other dege    | 0.580783 | 1.219869 | 0.86765  | 0.458977 | 42307 | 48   | 42259 |
| 315.1 Learning di   | 0.701285 | 1.651102 | 1.181361 | 0.459204 | 46151 | 28   | 46123 |
| 389.3 Degenerati    | 0.5204   | 1.256617 | 0.844719 | 0.461168 | 44257 | 34   | 44223 |
| 911 Blister         | 0.404115 | 1.363277 | 0.792092 | 0.465241 | 48312 | 20   | 48292 |
| 803.1 Fracture of   | 0.893642 | 1.240104 | 1.06298  | 0.467352 | 43091 | 213  | 42878 |
| 686 Other local     | 0.845723 | 1.074654 | 0.956691 | 0.469654 | 43688 | 482  | 43206 |

|                     |          |          |          |          |       |      |       |
|---------------------|----------|----------|----------|----------|-------|------|-------|
| 366.3 Traumatic c   | 0.415391 | 1.366316 | 0.799399 | 0.472647 | 45015 | 24   | 44991 |
| 370.1 Corneal ulc   | 0.614413 | 1.209334 | 0.882168 | 0.473058 | 43163 | 65   | 43098 |
| 275.11 Hereditary   | 0.869784 | 1.292485 | 1.075532 | 0.474409 | 47202 | 143  | 47059 |
| 251 Other disor     | 0.656643 | 1.181245 | 0.897835 | 0.476078 | 44867 | 82   | 44785 |
| 379.1 Scleritis anc | 0.688382 | 1.163238 | 0.908519 | 0.476606 | 44217 | 98   | 44119 |
| 352.2 Facial nerv   | 0.750795 | 1.127078 | 0.928762 | 0.477979 | 45399 | 169  | 45230 |
| 385 Other disor     | 0.878699 | 1.269011 | 1.06911  | 0.479012 | 43992 | 163  | 43829 |
| 535.6 Duodenitis    | 0.847757 | 1.338309 | 1.086892 | 0.479198 | 45906 | 103  | 45803 |
| 526.42 Arthralgia/i | 0.420649 | 1.360646 | 0.804513 | 0.479322 | 45865 | 23   | 45842 |
| 756.2 Pectus and    | 0.536494 | 1.271851 | 0.854003 | 0.480794 | 47782 | 46   | 47736 |
| 346.2 Nonspecific   | 0.480006 | 1.314223 | 0.831358 | 0.480969 | 42290 | 31   | 42259 |
| 855 Complicatic     | 0.875708 | 1.277254 | 1.070505 | 0.481917 | 46956 | 166  | 46790 |
| 401.3 Other hype    | 0.937248 | 1.136826 | 1.035173 | 0.483037 | 30095 | 574  | 29521 |
| 756 Other cong      | 0.67436  | 1.176255 | 0.904651 | 0.483767 | 47839 | 103  | 47736 |
| 290.3 Other persi   | 0.912859 | 1.189115 | 1.048307 | 0.485531 | 44087 | 301  | 43786 |
| 599.4 Urinary inc   | 0.845654 | 1.076505 | 0.957893 | 0.48556  | 42759 | 400  | 42359 |
| 794 Abnormal r      | 0.743077 | 1.543554 | 1.141751 | 0.488018 | 48271 | 33   | 48238 |
| 350.3 Lack of coo   | 0.848421 | 1.076509 | 0.959048 | 0.49192  | 46626 | 462  | 46164 |
| 244 Hypothyroi      | 0.962663 | 1.07914  | 1.020151 | 0.493625 | 46730 | 1916 | 44814 |
| 378.2 Nystagmus     | 0.77983  | 1.475557 | 1.120222 | 0.49377  | 44166 | 47   | 44119 |
| 71 Human imn        | 0.957378 | 1.090682 | 1.022992 | 0.494366 | 42559 | 1457 | 41102 |
| 457.3 Encounter f   | 0.92429  | 1.16213  | 1.040803 | 0.494406 | 43540 | 412  | 43128 |
| 604.1 Redundant     | 0.807538 | 1.408527 | 1.102404 | 0.498691 | 38861 | 58   | 38803 |
| 368.3 Anisometrc    | 0.421836 | 1.37038  | 0.812188 | 0.500052 | 46258 | 20   | 46238 |
| 130 Spirochetal     | 0.710322 | 1.622267 | 1.156913 | 0.500117 | 47814 | 28   | 47786 |
| 871.4 Open woun     | 0.566141 | 1.256571 | 0.870707 | 0.503494 | 43319 | 49   | 43270 |
| 963 Poisoning b     | 0.838928 | 1.346727 | 1.084566 | 0.506215 | 45945 | 103  | 45842 |
| 732.7 Osteochon     | 0.53561  | 1.282999 | 0.859985 | 0.506513 | 44463 | 40   | 44423 |
| 802 Fracture of     | 0.881818 | 1.249015 | 1.061017 | 0.507447 | 43071 | 193  | 42878 |
| 378 Strabismus      | 0.808408 | 1.101817 | 0.949141 | 0.509922 | 44402 | 283  | 44119 |
| 742.8 Articular ca  | 0.672144 | 1.185126 | 0.908504 | 0.510577 | 43449 | 88   | 43361 |
| 751.1 Congenital    | 0.667948 | 1.19095  | 0.906812 | 0.511096 | 47521 | 98   | 47423 |
| 425.11 Hypertroph   | 0.840827 | 1.338186 | 1.081416 | 0.513422 | 46954 | 99   | 46855 |

|                    |          |          |          |          |       |      |       |
|--------------------|----------|----------|----------|----------|-------|------|-------|
| 735.21 Hammer to   | 0.726518 | 1.149648 | 0.925968 | 0.513859 | 45674 | 116  | 45558 |
| 910 Superficial i  | 0.417726 | 1.384702 | 0.815154 | 0.516243 | 48301 | 21   | 48280 |
| 244.2 Acquired hy  | 0.839639 | 1.333003 | 1.080094 | 0.518007 | 44912 | 98   | 44814 |
| 724.9 Other unsp   | 0.682964 | 1.179811 | 0.913179 | 0.518332 | 41867 | 91   | 41776 |
| 274.2 Crystal arth | 0.707654 | 1.163883 | 0.920909 | 0.519188 | 46470 | 103  | 46367 |
| 952 Spinal cord    | 0.583256 | 1.254017 | 0.88014  | 0.519722 | 48301 | 54   | 48247 |
| 963.1 Antineoplas  | 0.631932 | 1.218795 | 0.897043 | 0.521188 | 45914 | 72   | 45842 |
| 522.5 Periapical a | 0.848807 | 1.312391 | 1.07465  | 0.521576 | 45960 | 118  | 45842 |
| 229.1 Benign neo   | 0.488004 | 1.325165 | 0.846152 | 0.521688 | 48261 | 29   | 48232 |
| 686.2 Impetigo     | 0.800957 | 1.408964 | 1.098207 | 0.522599 | 43271 | 65   | 43206 |
| 241 Nontoxic ne    | 0.8627   | 1.073311 | 0.965214 | 0.525789 | 45339 | 525  | 44814 |
| 715.3 Spinal enth  | 0.662149 | 1.647163 | 1.163527 | 0.527763 | 44635 | 20   | 44615 |
| 530.9 Heartburn    | 0.750695 | 1.141085 | 0.93458  | 0.528531 | 39386 | 162  | 39224 |
| 789 Nausea anc     | 0.963286 | 1.073014 | 1.017419 | 0.530424 | 46732 | 2393 | 44339 |
| 245 Thyroiditis    | 0.772583 | 1.127093 | 0.941091 | 0.530448 | 45008 | 194  | 44814 |
| 514.1 Abnormal r   | 0.46417  | 1.349721 | 0.840028 | 0.532746 | 46949 | 24   | 46925 |
| 961.1 Poisoning/c  | 0.74813  | 1.503675 | 1.118199 | 0.540467 | 45882 | 40   | 45842 |
| 136 Other infec    | 0.864704 | 1.27213  | 1.062018 | 0.543825 | 47941 | 155  | 47786 |
| 253.11 Acromegaly  | 0.655333 | 1.653466 | 1.159007 | 0.547096 | 44805 | 20   | 44785 |
| 145 Cancer of n    | 0.740704 | 1.150943 | 0.934449 | 0.548866 | 47828 | 134  | 47694 |
| 41.8 H. pylori     | 0.683314 | 1.192625 | 0.917805 | 0.549392 | 47247 | 88   | 47159 |
| 801.1 Fracture of  | 0.84348  | 1.08834  | 0.962012 | 0.552306 | 43309 | 431  | 42878 |
| 695.9 Unspecifiec  | 0.770095 | 1.449789 | 1.102461 | 0.554155 | 44255 | 51   | 44204 |
| 772.3 Muscle wea   | 0.872173 | 1.071665 | 0.969482 | 0.555857 | 46417 | 598  | 45819 |
| 752.1 Neural tube  | 0.727119 | 1.544381 | 1.123584 | 0.556596 | 47935 | 41   | 47894 |
| 732.1 Juvenile ost | 0.588882 | 1.265103 | 0.889912 | 0.556757 | 44473 | 50   | 44423 |
| 241.2 Nontoxic m   | 0.904034 | 1.183968 | 1.040879 | 0.561612 | 45108 | 294  | 44814 |
| 586.4 Stricture/ol | 0.768834 | 1.138799 | 0.943722 | 0.565054 | 44833 | 189  | 44644 |
| 946 Anaphylact     | 0.761832 | 1.141907 | 0.942254 | 0.566684 | 42904 | 156  | 42748 |
| 783 Fever of un    | 0.932373 | 1.038008 | 0.984457 | 0.567327 | 46921 | 2427 | 44494 |
| 691 Congenital     | 0.678447 | 1.199415 | 0.919499 | 0.56754  | 44288 | 84   | 44204 |
| 331.9 Cerebral de  | 0.879101 | 1.230901 | 1.050486 | 0.567751 | 42433 | 174  | 42259 |
| 149 Cancer of la   | 0.90454  | 1.178021 | 1.038234 | 0.578631 | 48004 | 310  | 47694 |

|        |              |          |          |          |          |       |     |       |
|--------|--------------|----------|----------|----------|----------|-------|-----|-------|
| 530.6  | Diverticulur | 0.468785 | 1.382229 | 0.855672 | 0.581807 | 39248 | 24  | 39224 |
| 429.2  | Abnormal f   | 0.874064 | 1.074487 | 0.971448 | 0.582705 | 45049 | 630 | 44419 |
| 498    | Acute bron   | 0.771256 | 1.432855 | 1.09223  | 0.583867 | 43061 | 51  | 43010 |
| 871.3  | Open woun    | 0.84425  | 1.292499 | 1.061865 | 0.584185 | 43399 | 129 | 43270 |
| 281.12 | Other vitan  | 0.752318 | 1.156682 | 0.943028 | 0.594966 | 46560 | 142 | 46418 |
| 348.4  | Cerebral cy  | 0.650138 | 1.237164 | 0.916189 | 0.597816 | 42336 | 77  | 42259 |
| 79.9   | Viremia, NC  | 0.434859 | 1.417863 | 0.847085 | 0.598152 | 41122 | 20  | 41102 |
| 800.4  | Fracture of  | 0.757157 | 1.154426 | 0.94506  | 0.601673 | 43037 | 159 | 42878 |
| 426.7  | Abnormal e   | 0.883286 | 1.070939 | 0.974711 | 0.60262  | 39491 | 716 | 38775 |
| 800.1  | Fracture of  | 0.842525 | 1.286841 | 1.058403 | 0.602711 | 43005 | 127 | 42878 |
| 420.22 | Chronic per  | 0.701999 | 1.540995 | 1.111575 | 0.608496 | 46886 | 31  | 46855 |
| 70.4   | Chronic hej  | 0.86584  | 1.240259 | 1.048092 | 0.610699 | 41271 | 169 | 41102 |
| 426.31 | Right bundl  | 0.871942 | 1.231296 | 1.045995 | 0.611476 | 38971 | 196 | 38775 |
| 364.1  | Corneal opa  | 0.721284 | 1.181764 | 0.937693 | 0.612326 | 45536 | 102 | 45434 |
| 426.4  | Anomalous    | 0.697508 | 1.206595 | 0.931387 | 0.614197 | 38879 | 104 | 38775 |
| 333.2  | Myoclonus    | 0.774076 | 1.414428 | 1.081784 | 0.614952 | 42320 | 61  | 42259 |
| 529    | Diseases an  | 0.675953 | 1.217443 | 0.926724 | 0.616031 | 47003 | 76  | 46927 |
| 420.21 | Acute peric  | 0.619375 | 1.274206 | 0.911853 | 0.620782 | 46913 | 58  | 46855 |
| 194    | Cancer of o  | 0.686615 | 1.545281 | 1.11057  | 0.622546 | 47763 | 26  | 47737 |
| 275.6  | Hypercalce   | 0.869502 | 1.229389 | 1.044674 | 0.622638 | 47236 | 177 | 47059 |
| 751.3  | Obstructive  | 0.567877 | 1.31857  | 0.898328 | 0.624698 | 47467 | 44  | 47423 |
| 204.11 | Lymphoid li  | 0.755828 | 1.455855 | 1.08688  | 0.625697 | 47191 | 58  | 47133 |
| 687    | Symptoms :   | 0.427785 | 1.453701 | 0.854446 | 0.626213 | 41589 | 20  | 41569 |
| 971    | Poisoning b  | 0.438012 | 1.449535 | 0.857231 | 0.626277 | 45863 | 21  | 45842 |
| 809    | Fracture of  | 0.892497 | 1.067382 | 0.978022 | 0.626766 | 43759 | 881 | 42878 |
| 375.2  | Epiphora     | 0.627811 | 1.260171 | 0.916364 | 0.627057 | 44165 | 46  | 44119 |
| 733    | Other disor  | 0.775302 | 1.147948 | 0.95234  | 0.627456 | 44602 | 179 | 44423 |
| 981    | Toxic effect | 0.632332 | 1.629535 | 1.127887 | 0.632808 | 48037 | 20  | 48017 |
| 713.5  | Arthropath   | 0.500931 | 1.371356 | 0.881606 | 0.633826 | 44713 | 26  | 44687 |
| 287.1  | Spontaneou   | 0.594704 | 1.301691 | 0.908669 | 0.63736  | 45299 | 49  | 45250 |
| 250.21 | Type 2 diab  | 0.530068 | 1.359176 | 0.892191 | 0.644203 | 39963 | 33  | 39930 |
| 223    | Benign neo   | 0.755646 | 1.415458 | 1.077833 | 0.645374 | 42025 | 45  | 41980 |
| 386.3  | Labyrinthiti | 0.655249 | 1.247219 | 0.926514 | 0.64582  | 44120 | 65  | 44055 |

|                     |          |          |          |          |       |      |       |
|---------------------|----------|----------|----------|----------|-------|------|-------|
| 290.12 Dementia v   | 0.613954 | 1.275094 | 0.916727 | 0.646567 | 43832 | 46   | 43786 |
| 306.9 Tension hea   | 0.731399 | 1.465624 | 1.086675 | 0.647436 | 36284 | 44   | 36240 |
| 366.1 Nonsenile C   | 0.536683 | 1.354086 | 0.896286 | 0.65028  | 45019 | 28   | 44991 |
| 375 Disorders o     | 0.834324 | 1.279605 | 1.050919 | 0.651341 | 44220 | 101  | 44119 |
| 755 Congenital      | 0.827633 | 1.294455 | 1.053386 | 0.651786 | 47848 | 112  | 47736 |
| 753 Congenital      | 0.559376 | 1.337729 | 0.902946 | 0.653493 | 47932 | 38   | 47894 |
| 550.2 Diaphragm     | 0.93811  | 1.101921 | 1.018604 | 0.65368  | 45886 | 919  | 44967 |
| 378.5 Paralytic str | 0.692538 | 1.220376 | 0.93743  | 0.657862 | 44200 | 81   | 44119 |
| 613.5 Mastodyn      | 0.467604 | 1.423487 | 0.87846  | 0.659161 | 48255 | 22   | 48233 |
| 270.1 Disturbanc    | 0.438833 | 1.468154 | 0.868292 | 0.659876 | 47314 | 21   | 47293 |
| 357 Inflammato      | 0.890656 | 1.180545 | 1.032184 | 0.660505 | 46801 | 282  | 46519 |
| 526.5 Inflammato    | 0.691704 | 1.518837 | 1.09516  | 0.661114 | 45874 | 32   | 45842 |
| 754.1 Lumbosacr     | 0.500746 | 1.406501 | 0.887923 | 0.661557 | 47766 | 30   | 47736 |
| 443.1 Raynaud's s   | 0.667114 | 1.244967 | 0.932215 | 0.663055 | 45737 | 74   | 45663 |
| 592.11 Acute cystit | 0.690476 | 1.510952 | 1.093333 | 0.66391  | 43681 | 28   | 43653 |
| 427.61 Supraventri  | 0.683242 | 1.231634 | 0.936195 | 0.664479 | 38852 | 77   | 38775 |
| 257 Testicular d    | 0.925104 | 1.049288 | 0.986257 | 0.666852 | 46443 | 1658 | 44785 |
| 531.3 Duodenal u    | 0.691319 | 1.226241 | 0.939476 | 0.6726   | 47417 | 80   | 47337 |
| 346 Abnormal f      | 0.559595 | 1.351848 | 0.908199 | 0.675163 | 42296 | 37   | 42259 |
| 442.8 Aneurysm c    | 0.721886 | 1.459278 | 1.078509 | 0.681173 | 45702 | 39   | 45663 |
| 346.3 Nonspecific   | 0.541958 | 1.377086 | 0.90647  | 0.686767 | 42293 | 34   | 42259 |
| 433.31 Transient c  | 0.935428 | 1.100747 | 1.016697 | 0.69022  | 45832 | 865  | 44967 |
| 751.2 Congenital    | 0.896829 | 1.16317  | 1.026774 | 0.691247 | 47774 | 351  | 47423 |
| 257.1 Testicular h  | 0.925311 | 1.051073 | 0.987237 | 0.692869 | 46396 | 1611 | 44785 |
| 187.1 Malignant r   | 0.642012 | 1.569827 | 1.097427 | 0.693021 | 46626 | 21   | 46605 |
| 530.13 Barrett's es | 0.86789  | 1.211244 | 1.034174 | 0.693888 | 39428 | 204  | 39224 |
| 755.6 Other cong    | 0.661877 | 1.545426 | 1.091711 | 0.695535 | 47762 | 26   | 47736 |
| 274.21 Chondrocal   | 0.728534 | 1.202104 | 0.951181 | 0.697574 | 46464 | 97   | 46367 |
| 71.1 HIV infectic   | 0.946886 | 1.081072 | 1.012898 | 0.704722 | 42529 | 1427 | 41102 |
| 227.2 Benign neo    | 0.703447 | 1.46999  | 1.075035 | 0.707475 | 47772 | 35   | 47737 |
| 751.22 Other speci  | 0.750952 | 1.403135 | 1.062851 | 0.707685 | 47484 | 61   | 47423 |
| 983 Toxic effect    | 0.744352 | 1.410955 | 1.064067 | 0.709441 | 48072 | 55   | 48017 |
| 429 Ill-defined c   | 0.938937 | 1.093089 | 1.01454  | 0.709875 | 45538 | 1119 | 44419 |



|                     |          |          |          |          |       |      |       |
|---------------------|----------|----------|----------|----------|-------|------|-------|
| 803.3 Fracture of   | 0.849315 | 1.109649 | 0.975256 | 0.714088 | 43278 | 400  | 42878 |
| 558 Noninfectic     | 0.89007  | 1.07886  | 0.982222 | 0.715053 | 41703 | 746  | 40957 |
| 681 Superficial     | 0.938539 | 1.043444 | 0.990299 | 0.718435 | 45567 | 2361 | 43206 |
| 145.2 Cancer of t   | 0.669735 | 1.261769 | 0.943845 | 0.724127 | 47758 | 64   | 47694 |
| 368.4 Visual field  | 0.785498 | 1.163763 | 0.965532 | 0.727758 | 46408 | 170  | 46238 |
| 244.4 Hypothyroi    | 0.950265 | 1.07302  | 1.010795 | 0.729109 | 46526 | 1712 | 44814 |
| 226 Benign neo      | 0.68448  | 1.250261 | 0.947649 | 0.729675 | 47806 | 69   | 47737 |
| 752.11 Spina bifida | 0.591191 | 1.696242 | 1.102425 | 0.730865 | 47919 | 25   | 47894 |
| 782 Symptoms        | 0.762189 | 1.370205 | 1.053155 | 0.733399 | 45734 | 67   | 45667 |
| 579 Other symp      | 0.934306 | 1.096005 | 1.013787 | 0.736888 | 43965 | 979  | 42986 |
| 535.8 Other speci   | 0.853368 | 1.110337 | 0.977777 | 0.738463 | 46183 | 380  | 45803 |
| 596.1 Bladder nec   | 0.773281 | 1.175343 | 0.964867 | 0.7391   | 46811 | 132  | 46679 |
| 269 Proteinuria     | 0.906406 | 1.13801  | 1.019498 | 0.739922 | 47754 | 461  | 47293 |
| 577.3 Cyst and ps   | 0.765747 | 1.355267 | 1.050111 | 0.740852 | 47900 | 63   | 47837 |
| 252 Disorders o     | 0.794769 | 1.157761 | 0.968732 | 0.741939 | 44959 | 174  | 44785 |
| 277 Other disor     | 0.751422 | 1.384998 | 1.053613 | 0.742376 | 47460 | 65   | 47395 |
| 290.1 Dementias     | 0.851008 | 1.112273 | 0.977769 | 0.742477 | 44103 | 317  | 43786 |
| 368.9 Subjective \  | 0.840931 | 1.121033 | 0.976196 | 0.743209 | 46538 | 300  | 46238 |
| 528.12 Oral aphtha  | 0.597115 | 1.345961 | 0.933423 | 0.745162 | 46969 | 42   | 46927 |
| 743.4 Stress fract  | 0.74362  | 1.392066 | 1.05443  | 0.745478 | 47017 | 58   | 46959 |
| 743.2 Pathologic    | 0.8008   | 1.15474  | 0.970188 | 0.747038 | 47158 | 199  | 46959 |
| 743.11 Osteoporos   | 0.88121  | 1.173661 | 1.023824 | 0.748166 | 47226 | 267  | 46959 |
| 716.2 Unspecifiec   | 0.497483 | 1.446479 | 0.914294 | 0.75163  | 44707 | 20   | 44687 |
| 90.2 Gonococcal     | 0.738104 | 1.390571 | 1.053049 | 0.753982 | 47889 | 49   | 47840 |
| 374.1 Ectropion o   | 0.722811 | 1.223563 | 0.958703 | 0.755098 | 43177 | 79   | 43098 |
| 591 Urinary trac    | 0.923459 | 1.05746  | 0.989399 | 0.757939 | 44976 | 1323 | 43653 |
| 499 Cystic fibro:   | 0.69855  | 1.478773 | 1.061531 | 0.76117  | 48326 | 52   | 48274 |
| 355 Complex re      | 0.757534 | 1.196274 | 0.965347 | 0.763998 | 45356 | 126  | 45230 |
| 531 Peptic ulcer    | 0.898885 | 1.143829 | 1.018525 | 0.76578  | 47735 | 398  | 47337 |
| 367.9 Blindness a   | 0.864717 | 1.194885 | 1.02499  | 0.765836 | 45812 | 214  | 45598 |
| 364.9 Cornea repl   | 0.645387 | 1.528071 | 1.06988  | 0.766292 | 45459 | 25   | 45434 |
| 556 Ulceration      | 0.715696 | 1.237161 | 0.959393 | 0.768971 | 41048 | 91   | 40957 |
| 277.7 Dysmetabo     | 0.826063 | 1.139097 | 0.976881 | 0.77618  | 47636 | 241  | 47395 |

|                    |          |          |          |          |       |     |       |
|--------------------|----------|----------|----------|----------|-------|-----|-------|
| 433.6 Acute, but i | 0.907576 | 1.128489 | 1.015705 | 0.779562 | 45449 | 482 | 44967 |
| 384.1 Myringitis   | 0.521482 | 1.440378 | 0.927773 | 0.779649 | 43854 | 25  | 43829 |
| 585.4 Chronic kid  | 0.855892 | 1.115305 | 0.98138  | 0.781301 | 45002 | 358 | 44644 |
| 598 Abnormal f     | 0.600923 | 1.355329 | 0.943069 | 0.782326 | 48108 | 38  | 48070 |
| 556.1 Ulceration   | 0.703905 | 1.254275 | 0.960366 | 0.7863   | 41038 | 81  | 40957 |
| 385.3 Cholesteat   | 0.789861 | 1.301609 | 1.035182 | 0.788578 | 43923 | 94  | 43829 |
| 711.2 Reiter's dis | 0.46105  | 1.524665 | 0.91795  | 0.78876  | 44707 | 20  | 44687 |
| 281.1 Megaloblas   | 0.843577 | 1.220288 | 1.025142 | 0.793167 | 46586 | 168 | 46418 |
| 433.12 Cerebral at | 0.822041 | 1.247319 | 1.027719 | 0.798569 | 45084 | 117 | 44967 |
| 840.1 Muscle/ten   | 0.706546 | 1.252905 | 0.963267 | 0.800254 | 42209 | 71  | 42138 |
| 337.1 Peripheral   | 0.673608 | 1.288566 | 0.95893  | 0.802566 | 42317 | 58  | 42259 |
| 303 Psychogeni     | 0.836674 | 1.226916 | 1.024463 | 0.805822 | 36421 | 181 | 36240 |
| 187.2 Malignant r  | 0.81375  | 1.262091 | 1.028136 | 0.805896 | 46745 | 140 | 46605 |
| 738.4 Acquired sp  | 0.827239 | 1.144378 | 0.980252 | 0.810321 | 45785 | 227 | 45558 |
| 525 Other disea    | 0.844722 | 1.129559 | 0.982326 | 0.810509 | 46144 | 302 | 45842 |
| 271 Disorders o    | 0.500204 | 1.490337 | 0.934166 | 0.81411  | 48284 | 23  | 48261 |
| 781.2 Abnormal p   | 0.702051 | 1.267501 | 0.965029 | 0.815566 | 47545 | 74  | 47471 |
| 244.1 Secondary l  | 0.88314  | 1.156371 | 1.016134 | 0.816485 | 45143 | 329 | 44814 |
| 374.3 Ptosis of ey | 0.806818 | 1.164608 | 0.978618 | 0.818161 | 43265 | 167 | 43098 |
| 149.9 Cancer of o  | 0.586987 | 1.385231 | 0.949782 | 0.818532 | 47727 | 33  | 47694 |
| 301.1 Schizoid pe  | 0.456247 | 1.556319 | 0.927712 | 0.819708 | 36260 | 20  | 36240 |
| 722.9 Other and t  | 0.762441 | 1.329038 | 1.033056 | 0.82083  | 41846 | 70  | 41776 |
| 737.1 Kyphosis (a  | 0.730959 | 1.377286 | 1.037654 | 0.822353 | 45618 | 60  | 45558 |
| 341 Other demy     | 0.814928 | 1.160171 | 0.980054 | 0.823799 | 42478 | 219 | 42259 |
| 281.11 Pernicious  | 0.621322 | 1.355901 | 0.955829 | 0.823925 | 46457 | 39  | 46418 |
| 870.5 Open woun    | 0.835869 | 1.221229 | 1.02187  | 0.824232 | 43449 | 179 | 43270 |
| 751.21 Cystic kidn | 0.872507 | 1.169212 | 1.01674  | 0.824681 | 47695 | 272 | 47423 |
| 535.9 Gastritis an | 0.825694 | 1.236611 | 1.023101 | 0.825875 | 45952 | 149 | 45803 |
| 250.25 Diabetes ty | 0.787965 | 1.283971 | 1.027756 | 0.827782 | 40016 | 86  | 39930 |
| 592.1 Cystitis     | 0.823608 | 1.235472 | 1.02278  | 0.828795 | 43780 | 127 | 43653 |
| 537 Other disor    | 0.89801  | 1.132673 | 1.012518 | 0.833959 | 46264 | 461 | 45803 |
| 528.1 Stomatitis   | 0.78292  | 1.295394 | 1.027512 | 0.834574 | 47025 | 98  | 46927 |
| 856 Vascular co    | 0.628202 | 1.530309 | 1.050086 | 0.83472  | 46819 | 29  | 46790 |

|                     |          |          |          |          |       |      |       |
|---------------------|----------|----------|----------|----------|-------|------|-------|
| 780 Hypotherm       | 0.666297 | 1.459368 | 1.043075 | 0.837795 | 48301 | 33   | 48268 |
| 529.1 Glossitis     | 0.610514 | 1.534831 | 1.051193 | 0.838016 | 46951 | 24   | 46927 |
| 335 Multiple scl    | 0.866041 | 1.115398 | 0.986881 | 0.838242 | 42679 | 420  | 42259 |
| 750.21 Congenital   | 0.666216 | 1.313336 | 0.964861 | 0.839063 | 47480 | 57   | 47423 |
| 705.1 Dyshidrosis   | 0.735684 | 1.35455  | 1.031548 | 0.844462 | 44623 | 54   | 44569 |
| 743.9 Osteopenia    | 0.883487 | 1.100149 | 0.989235 | 0.846849 | 47463 | 504  | 46959 |
| 700 Corns and c     | 0.79335  | 1.271662 | 1.023481 | 0.848477 | 45812 | 91   | 45721 |
| 245.2 Chronic thy   | 0.787264 | 1.282048 | 1.023863 | 0.85128  | 44916 | 102  | 44814 |
| 291.4 Specific nor  | 0.840419 | 1.2085   | 1.017499 | 0.852355 | 43988 | 202  | 43786 |
| 386.21 Central orig | 0.729771 | 1.362078 | 1.030455 | 0.852584 | 44106 | 51   | 44055 |
| 433.3 Cerebral isc  | 0.931226 | 1.085562 | 1.007099 | 0.856602 | 45960 | 993  | 44967 |
| 364.41 Keratoconu   | 0.748069 | 1.33564  | 1.027501 | 0.856624 | 45501 | 67   | 45434 |
| 291.1 Transient nr  | 0.693685 | 1.294788 | 0.971212 | 0.856652 | 43858 | 72   | 43786 |
| 174 Breast canc     | 0.551472 | 1.442622 | 0.955564 | 0.857795 | 48171 | 26   | 48145 |
| 371.1 Uveitis, nor  | 0.862201 | 1.17599  | 1.014294 | 0.85827  | 43337 | 239  | 43098 |
| 727.5 Rupture of    | 0.757967 | 1.314702 | 1.025592 | 0.859152 | 40084 | 68   | 40016 |
| 751.12 Congenital   | 0.641834 | 1.358606 | 0.966032 | 0.859541 | 47479 | 56   | 47423 |
| 916 Contusion       | 0.946857 | 1.065554 | 1.005341 | 0.859707 | 47068 | 1963 | 45105 |
| 594.8 Renal colic   | 0.793453 | 1.191003 | 0.982265 | 0.863602 | 45888 | 167  | 45721 |
| 755.1 Congenital    | 0.694331 | 1.292876 | 0.973144 | 0.86569  | 47802 | 66   | 47736 |
| 686.3 Pilonidal cy  | 0.741696 | 1.343497 | 1.026077 | 0.867452 | 43283 | 77   | 43206 |
| 740.12 Osteoarthr   | 0.626101 | 1.371447 | 0.966913 | 0.868722 | 42743 | 38   | 42705 |
| 800.3 Fracture of   | 0.865069 | 1.120685 | 0.989161 | 0.869275 | 43277 | 399  | 42878 |
| 249 Secondary c     | 0.712592 | 1.373821 | 1.028498 | 0.869411 | 39982 | 52   | 39930 |
| 592.12 Chronic cys  | 0.755929 | 1.313952 | 1.023566 | 0.870413 | 43718 | 65   | 43653 |
| 535 Gastritis an    | 0.920117 | 1.097906 | 1.007263 | 0.872564 | 46619 | 816  | 45803 |
| 290.13 Senile dem   | 0.727991 | 1.256244 | 0.977833 | 0.872919 | 43856 | 70   | 43786 |
| 110.12 Athlete's fo | 0.835134 | 1.149467 | 0.98701  | 0.873023 | 45285 | 217  | 45068 |
| 800 Fracture of     | 0.906422 | 1.082759 | 0.992795 | 0.873455 | 43722 | 844  | 42878 |
| 242.1 Graves' dise  | 0.813558 | 1.172145 | 0.985232 | 0.873737 | 45010 | 196  | 44814 |
| 870.1 Open woun     | 0.80048  | 1.184516 | 0.98416  | 0.873943 | 43444 | 174  | 43270 |
| 751 Genitourina     | 0.878787 | 1.108994 | 0.990813 | 0.876677 | 47910 | 487  | 47423 |
| 313.2 Tics and stu  | 0.704156 | 1.393495 | 1.026741 | 0.882178 | 46182 | 59   | 46123 |

|                     |          |          |          |          |       |      |       |
|---------------------|----------|----------|----------|----------|-------|------|-------|
| 442.4 Arterial dis  | 0.683353 | 1.316204 | 0.976444 | 0.888452 | 45725 | 62   | 45663 |
| 174.11 Malignant r  | 0.599569 | 1.518767 | 1.034668 | 0.889804 | 48169 | 24   | 48145 |
| 174.1 Breast canc   | 0.599569 | 1.518767 | 1.034668 | 0.889804 | 48169 | 24   | 48145 |
| 8 Intestinal ir     | 0.82651  | 1.162938 | 0.988104 | 0.891231 | 47873 | 225  | 47648 |
| 681.6 Cellulitis an | 0.790404 | 1.198881 | 0.985573 | 0.891983 | 43347 | 141  | 43206 |
| 41.12 Methicillin   | 0.712061 | 1.290183 | 0.979524 | 0.892797 | 47241 | 82   | 47159 |
| 8.6 Viral Enteri    | 0.774074 | 1.285282 | 1.017591 | 0.894059 | 47742 | 94   | 47648 |
| 346.1 Nonspecific   | 0.785869 | 1.206671 | 0.985616 | 0.89531  | 42401 | 142  | 42259 |
| 320 Meningitis      | 0.793793 | 1.258388 | 1.014907 | 0.900774 | 48105 | 128  | 47977 |
| 497 Bronchitis      | 0.867604 | 1.159626 | 1.009079 | 0.903119 | 43304 | 294  | 43010 |
| 292.1 Aphasia/sp    | 0.892113 | 1.10052  | 0.99397  | 0.910239 | 44336 | 550  | 43786 |
| 721.2 Spondylosi    | 0.823535 | 1.169871 | 0.990535 | 0.915788 | 41959 | 183  | 41776 |
| 255.12 Hyperaldos   | 0.66715  | 1.341178 | 0.981063 | 0.916184 | 44833 | 48   | 44785 |
| 722.3 Schmorl's n   | 0.533377 | 1.625499 | 1.030063 | 0.921129 | 41797 | 21   | 41776 |
| 145.3 Cancer of n   | 0.659374 | 1.423969 | 1.020104 | 0.921182 | 47729 | 35   | 47694 |
| 368.1 Amblyopia     | 0.647722 | 1.373021 | 0.981094 | 0.922181 | 46281 | 43   | 46238 |
| 597 Other disor     | 0.851461 | 1.144597 | 0.993466 | 0.930994 | 46944 | 265  | 46679 |
| 788 Syncope an      | 0.94679  | 1.059539 | 1.002409 | 0.933216 | 47635 | 2021 | 45614 |
| 300.8 Acute react   | 0.738299 | 1.317216 | 1.012476 | 0.934121 | 36313 | 73   | 36240 |
| 379.3 Aphakia an    | 0.679622 | 1.338443 | 0.986416 | 0.93801  | 44167 | 48   | 44119 |
| 681.2 Cellulitis an | 0.860873 | 1.160232 | 1.005893 | 0.938713 | 43492 | 286  | 43206 |
| 747.2 Congenital    | 0.786    | 1.257491 | 1.009238 | 0.939344 | 47581 | 116  | 47465 |
| 474.1 Acute tonsi   | 0.789731 | 1.214906 | 0.991654 | 0.939661 | 37424 | 150  | 37274 |
| 187 Cancer of o     | 0.822326 | 1.20822  | 1.007451 | 0.940081 | 46784 | 179  | 46605 |
| 442.3 Aneurysm c    | 0.629082 | 1.454394 | 1.016106 | 0.942183 | 45693 | 30   | 45663 |
| 427.6 Premature     | 0.897251 | 1.116377 | 1.004043 | 0.942384 | 39308 | 533  | 38775 |
| 459.1 Hemorrhag     | 0.636063 | 1.453998 | 1.015379 | 0.944025 | 46893 | 35   | 46858 |
| 580.1 Glomerulor    | 0.72999  | 1.330972 | 1.01071  | 0.945391 | 44715 | 71   | 44644 |
| 286.13 Congenital   | 0.640246 | 1.474376 | 1.014777 | 0.946364 | 45292 | 42   | 45250 |
| 713 Arthropath      | 0.663962 | 1.357767 | 0.988352 | 0.949872 | 44731 | 44   | 44687 |
| 597.8 Urethral hy   | 0.760999 | 1.246406 | 0.992063 | 0.949927 | 46765 | 86   | 46679 |
| 772.1 Muscular w    | 0.590504 | 1.44964  | 0.985606 | 0.951141 | 45848 | 29   | 45819 |
| 526.1 Cysts of the  | 0.639322 | 1.441284 | 1.012924 | 0.952017 | 45877 | 35   | 45842 |

|        |              |          |          |          |          |       |     |       |                                            |
|--------|--------------|----------|----------|----------|----------|-------|-----|-------|--------------------------------------------|
| 227.1  | Benign neo   | 0.77042  | 1.266981 | 1.007537 | 0.953304 | 47829 | 92  | 47737 |                                            |
| 290.16 | Vascular de  | 0.652471 | 1.368012 | 0.989037 | 0.954301 | 43823 | 37  | 43786 |                                            |
| 292.5  | Transient al | 0.789223 | 1.219259 | 0.993768 | 0.955427 | 43929 | 143 | 43786 |                                            |
| 277.4  | Disorders o  | 0.688469 | 1.338642 | 0.990441 | 0.955621 | 47455 | 60  | 47395 |                                            |
| 377.3  | Optic neuro  | 0.765886 | 1.246509 | 0.993568 | 0.958936 | 44222 | 103 | 44119 |                                            |
| 727.7  | Contracture  | 0.674182 | 1.349199 | 0.99091  | 0.95966  | 40064 | 48  | 40016 |                                            |
| 252.1  | Hyperparat   | 0.814364 | 1.209822 | 1.004969 | 0.961111 | 44930 | 145 | 44785 |                                            |
| 535.2  | Atrophic ga  | 0.857554 | 1.159629 | 1.003638 | 0.962511 | 46080 | 277 | 45803 |                                            |
| 348.9  | Other cond   | 0.917354 | 1.090046 | 1.00195  | 0.964715 | 43128 | 869 | 42259 |                                            |
| 190    | Cancer of e  | 0.705881 | 1.343853 | 1.007366 | 0.964966 | 47717 | 55  | 47662 |                                            |
| 555.21 | Ulcerative c | 0.812586 | 1.195703 | 0.995896 | 0.966903 | 41137 | 180 | 40957 |                                            |
| 193    | Thyroid car  | 0.817148 | 1.189686 | 0.996249 | 0.968892 | 47911 | 174 | 47737 |                                            |
| 716.1  | Unspecifiec  | 0.535465 | 1.522113 | 0.989452 | 0.969635 | 44707 | 20  | 44687 |                                            |
| 253.1  | Pituitary hy | 0.723765 | 1.319792 | 1.004712 | 0.975911 | 44854 | 69  | 44785 |                                            |
| 79.2   | Infectious r | 0.732335 | 1.296759 | 0.995645 | 0.976485 | 41203 | 101 | 41102 |                                            |
| 212    | Benign neo   | 0.778389 | 1.235779 | 0.99664  | 0.977427 | 48262 | 110 | 48152 |                                            |
| 695.41 | Cutaneous    | 0.645067 | 1.396463 | 0.995077 | 0.980518 | 43814 | 39  | 43775 |                                            |
| 333.1  | Essential tr | 0.865411 | 1.138804 | 0.998433 | 0.982184 | 42568 | 309 | 42259 |                                            |
| 300.11 | Generalizec  | 0.895093 | 1.108292 | 0.999039 | 0.985948 | 36857 | 617 | 36240 |                                            |
| 715.2  | Ankylosing   | 0.807155 | 1.213739 | 1.001799 | 0.986315 | 44774 | 159 | 44615 |                                            |
| 580.31 | Nephritis ai | 0.710443 | 1.332199 | 1.002746 | 0.986591 | 44700 | 56  | 44644 |                                            |
| 327.31 | Central/nor  | 0.735738 | 1.304713 | 1.002432 | 0.986858 | 40350 | 70  | 40280 |                                            |
| 430.3  | Subdural he  | 0.786126 | 1.229879 | 0.998188 | 0.987432 | 45087 | 120 | 44967 |                                            |
| 530.5  | Disorders o  | 0.775196 | 1.252293 | 1.001494 | 0.990345 | 39328 | 104 | 39224 |                                            |
| 149.1  | Cancer of o  | 0.702973 | 1.336132 | 1.001289 | 0.993829 | 47750 | 56  | 47694 |                                            |
| 276.8  | Polydipsia   | 0.6407   | 1.430518 | 1.001502 | 0.994312 | 43372 | 42  | 43330 |                                            |
| 10     | Tuberculosi  | 0.724161 | 1.315581 | 1.000903 | 0.995335 | 47224 | 65  | 47159 |                                            |
| 528.11 | Stomatitis a | 0.589381 | 1.492877 | 1.000289 | 0.999062 | 46959 | 32  | 46927 |                                            |
| 611.1  | Abnormal r   | NA       | NA       | NA       | NA       | 47865 | 7   | 47858 | [Error: < 20 cases or controls]            |
| 620    | Dysplasia o  | NA       | NA       | NA       | NA       | 48343 | 1   | 48342 | [Error: < 20 cases or controls]            |
| 614.54 | Abscess or   | NA       | NA       | NA       | NA       | 48335 | NA  | NA    | [Error: non-varying phenotype or genotype] |
| 525.2  | Atrophy of   | NA       | NA       | NA       | NA       | 45850 | 8   | 45842 | [Error: < 20 cases or controls]            |
| 615    | Endometric   | NA       | NA       | NA       | NA       | 48336 | 1   | 48335 | [Error: < 20 cases or controls]            |

|                       |    |    |    |       |    |       |                                            |
|-----------------------|----|----|----|-------|----|-------|--------------------------------------------|
| 327.72 Sleep relat    | NA | NA | NA | 40297 | 17 | 40280 | [Error: < 20 cases or controls]            |
| 441.2 Chronic vas     | NA | NA | NA | 45674 | 11 | 45663 | [Error: < 20 cases or controls]            |
| 149.2 Cancer of n     | NA | NA | NA | 47709 | 15 | 47694 | [Error: < 20 cases or controls]            |
| 592.3 Urethral str    | NA | NA | NA | 43655 | 2  | 43653 | [Error: < 20 cases or controls]            |
| 159.4 Malignant r     | NA | NA | NA | 46631 | 12 | 46619 | [Error: < 20 cases or controls]            |
| 657 Infections s      | NA | NA | NA | 48320 | 1  | 48319 | [Error: < 20 cases or controls]            |
| 279.2 Autoimmu        | NA | NA | NA | 46877 | 8  | 46869 | [Error: < 20 cases or controls]            |
| 362.1 Retinopath      | NA | NA | NA | 45296 | 8  | 45288 | [Error: < 20 cases or controls]            |
| 117.4 Aspergillo      | NA | NA | NA | 45082 | 14 | 45068 | [Error: < 20 cases or controls]            |
| 791 Gangrene          | NA | NA | NA | 48335 | 12 | 48323 | [Error: < 20 cases or controls]            |
| 691.3 Congenital      | NA | NA | NA | 44216 | 12 | 44204 | [Error: < 20 cases or controls]            |
| 521.2 Dental abra     | NA | NA | NA | 45842 | NA | NA    | [Error: non-varying phenotype or genotype] |
| 303.1 Dissociativ     | NA | NA | NA | 36248 | 8  | 36240 | [Error: < 20 cases or controls]            |
| 362.5 Toxic macu      | NA | NA | NA | 45304 | 16 | 45288 | [Error: < 20 cases or controls]            |
| 480.13 MRSA pneu      | NA | NA | NA | 42155 | 11 | 42144 | [Error: < 20 cases or controls]            |
| 613.1 Inflammato      | NA | NA | NA | 48240 | 7  | 48233 | [Error: < 20 cases or controls]            |
| 184.1 Malignant r     | NA | NA | NA | 48216 | 3  | 48213 | [Error: < 20 cases or controls]            |
| 988 Toxic effect      | NA | NA | NA | 48022 | 5  | 48017 | [Error: < 20 cases or controls]            |
| 174.2 Breast canc     | NA | NA | NA | 48150 | 5  | 48145 | [Error: < 20 cases or controls]            |
| 604.2 Vascular dis    | NA | NA | NA | 38805 | 2  | 38803 | [Error: < 20 cases or controls]            |
| 621 Endometri         | NA | NA | NA | 48342 | NA | NA    | [Error: non-varying phenotype or genotype] |
| 270.34 Alpha-1-ant    | NA | NA | NA | 47312 | 19 | 47293 | [Error: < 20 cases or controls]            |
| 619.2 Disorders o     | NA | NA | NA | 48332 | 1  | 48331 | [Error: < 20 cases or controls]            |
| 446.3 Hypersensit     | NA | NA | NA | 45676 | 13 | 45663 | [Error: < 20 cases or controls]            |
| 958.1 Postoperati     | NA | NA | NA | 48106 | 2  | 48104 | [Error: < 20 cases or controls]            |
| 626.15 Infertility, f | NA | NA | NA | 48252 | NA | NA    | [Error: non-varying phenotype or genotype] |
| 446.8 Thrombotic      | NA | NA | NA | 45665 | 2  | 45663 | [Error: < 20 cases or controls]            |
| 444.5 Atheroemb       | NA | NA | NA | 45666 | 3  | 45663 | [Error: < 20 cases or controls]            |
| 627.22 Need for H     | NA | NA | NA | 48258 | 6  | 48252 | [Error: < 20 cases or controls]            |
| 184 Cancer of o       | NA | NA | NA | 48218 | 5  | 48213 | [Error: < 20 cases or controls]            |
| 261.41 Ricketts or c  | NA | NA | NA | 44740 | 19 | 44721 | [Error: < 20 cases or controls]            |
| 133 Arthropod-        | NA | NA | NA | 47794 | 8  | 47786 | [Error: < 20 cases or controls]            |
| 756.5 Congenital      | NA | NA | NA | 47750 | 14 | 47736 | [Error: < 20 cases or controls]            |

|                     |    |    |    |       |    |       |                                            |
|---------------------|----|----|----|-------|----|-------|--------------------------------------------|
| 614.53 Cyst or abs  | NA | NA | NA | 48335 | NA | NA    | [Error: non-varying phenotype or genotype] |
| 620.1 Dysplasia o   | NA | NA | NA | 48342 | NA | NA    | [Error: non-varying phenotype or genotype] |
| 736.1 Acquired d    | NA | NA | NA | 45577 | 19 | 45558 | [Error: < 20 cases or controls]            |
| 306.1 Mental disc   | NA | NA | NA | 36240 | NA | NA    | [Error: non-varying phenotype or genotype] |
| 961 Poisoning b     | NA | NA | NA | 45858 | 16 | 45842 | [Error: < 20 cases or controls]            |
| 246.2 Thyroid cys   | NA | NA | NA | 44830 | 16 | 44814 | [Error: < 20 cases or controls]            |
| 612.3 Congenital    | NA | NA | NA | 47858 | NA | NA    | [Error: non-varying phenotype or genotype] |
| 750.14 Congenital   | NA | NA | NA | 47430 | 7  | 47423 | [Error: < 20 cases or controls]            |
| 444.2 Embolism a    | NA | NA | NA | 45675 | 12 | 45663 | [Error: < 20 cases or controls]            |
| 614 Inflammatic     | NA | NA | NA | 48337 | 2  | 48335 | [Error: < 20 cases or controls]            |
| 286.6 Defibrinatic  | NA | NA | NA | 45264 | 14 | 45250 | [Error: < 20 cases or controls]            |
| 610.4 Benign neo    | NA | NA | NA | 47862 | 4  | 47858 | [Error: < 20 cases or controls]            |
| 756.3 Congenital    | NA | NA | NA | 47753 | 17 | 47736 | [Error: < 20 cases or controls]            |
| 592.21 Urethral sy  | NA | NA | NA | 43660 | 7  | 43653 | [Error: < 20 cases or controls]            |
| 654.1 Abnormalit    | NA | NA | NA | 48335 | NA | NA    | [Error: non-varying phenotype or genotype] |
| 614.52 Vaginitis an | NA | NA | NA | 48335 | NA | NA    | [Error: non-varying phenotype or genotype] |
| 230 Kaposi's sar    | NA | NA | NA | 48337 | 14 | 48323 | [Error: < 20 cases or controls]            |
| 270.21 Disorders o  | NA | NA | NA | 47298 | 5  | 47293 | [Error: < 20 cases or controls]            |
| 305.21 Anorexia n   | NA | NA | NA | 36243 | 3  | 36240 | [Error: < 20 cases or controls]            |
| 656.8 Perinatal ja  | NA | NA | NA | 48232 | 1  | 48231 | [Error: < 20 cases or controls]            |
| 972.1 Cardiac rhy   | NA | NA | NA | 45855 | 13 | 45842 | [Error: < 20 cases or controls]            |
| 31.1 Leprosy        | NA | NA | NA | 47160 | 1  | 47159 | [Error: < 20 cases or controls]            |
| 527.1 Hypertroph    | NA | NA | NA | 46934 | 7  | 46927 | [Error: < 20 cases or controls]            |
| 729.7 Nontrauma     | NA | NA | NA | 40021 | 5  | 40016 | [Error: < 20 cases or controls]            |
| 379.51 Pigmentary   | NA | NA | NA | 44135 | 16 | 44119 | [Error: < 20 cases or controls]            |
| 694.3 Vascular di   | NA | NA | NA | 44215 | 11 | 44204 | [Error: < 20 cases or controls]            |
| 729.3 Panniculitis  | NA | NA | NA | 40031 | 15 | 40016 | [Error: < 20 cases or controls]            |
| 941 Adverse re      | NA | NA | NA | 42750 | 2  | 42748 | [Error: < 20 cases or controls]            |
| 175 Acquired ak     | NA | NA | NA | 47971 | NA | NA    | [Error: non-varying phenotype or genotype] |
| 949.1 Diaper or n   | NA | NA | NA | 42752 | 4  | 42748 | [Error: < 20 cases or controls]            |
| 277.6 Other defic   | NA | NA | NA | 47400 | 5  | 47395 | [Error: < 20 cases or controls]            |
| 327.6 Circadian r   | NA | NA | NA | 40296 | 16 | 40280 | [Error: < 20 cases or controls]            |
| 756.22 Pectus carir | NA | NA | NA | 47745 | 9  | 47736 | [Error: < 20 cases or controls]            |

|                        |    |    |    |       |    |       |                                            |
|------------------------|----|----|----|-------|----|-------|--------------------------------------------|
| 284.1 Pancytoper NA    | NA | NA | NA | 46432 | 14 | 46418 | [Error: < 20 cases or controls]            |
| 277.8 Carnitine d NA   | NA | NA | NA | 47396 | 1  | 47395 | [Error: < 20 cases or controls]            |
| 286.4 Acquired cc NA   | NA | NA | NA | 45269 | 19 | 45250 | [Error: < 20 cases or controls]            |
| 452.1 Iatrogenic ç NA  | NA | NA | NA | 43143 | 15 | 43128 | [Error: < 20 cases or controls]            |
| 649.1 Diabetes or NA   | NA | NA | NA | 48337 | 1  | 48336 | [Error: < 20 cases or controls]            |
| 702.4 Degenerati NA    | NA | NA | NA | 42769 | 3  | 42766 | [Error: < 20 cases or controls]            |
| 81.1 Graft-versu NA    | NA | NA | NA | 47816 | 9  | 47807 | [Error: < 20 cases or controls]            |
| 691.1 Ichthyosis c NA  | NA | NA | NA | 44207 | 3  | 44204 | [Error: < 20 cases or controls]            |
| 695.21 Dermatitis l NA | NA | NA | NA | 44210 | 6  | 44204 | [Error: < 20 cases or controls]            |
| 145.1 Cancer of li NA  | NA | NA | NA | 47700 | 6  | 47694 | [Error: < 20 cases or controls]            |
| 656.1 Isoimmuniz NA    | NA | NA | NA | 48231 | NA | NA    | [Error: non-varying phenotype or genotype] |
| 750.5 Congenital NA    | NA | NA | NA | 47424 | 1  | 47423 | [Error: < 20 cases or controls]            |
| 624.9 stress incor NA  | NA | NA | NA | 48292 | 10 | 48282 | [Error: < 20 cases or controls]            |
| 624.2 Atrophy of NA    | NA | NA | NA | 48282 | NA | NA    | [Error: non-varying phenotype or genotype] |
| 259.8 Polyglandul NA   | NA | NA | NA | 44791 | 6  | 44785 | [Error: < 20 cases or controls]            |
| 580.11 Proliferativ NA | NA | NA | NA | 44661 | 17 | 44644 | [Error: < 20 cases or controls]            |
| 701.3 Circumscrit NA   | NA | NA | NA | 45733 | 12 | 45721 | [Error: < 20 cases or controls]            |
| 735.22 Claw toe (a NA  | NA | NA | NA | 45565 | 7  | 45558 | [Error: < 20 cases or controls]            |
| 218 Benign neo NA      | NA | NA | NA | 47598 | NA | NA    | [Error: non-varying phenotype or genotype] |
| 637 Short gesta NA     | NA | NA | NA | 48327 | 3  | 48324 | [Error: < 20 cases or controls]            |
| 70.1 Viral hepatis NA  | NA | NA | NA | 41119 | 17 | 41102 | [Error: < 20 cases or controls]            |
| 363.4 Choroidal d NA   | NA | NA | NA | 45437 | 3  | 45434 | [Error: < 20 cases or controls]            |
| 634 Miscarriage NA     | NA | NA | NA | 48335 | 3  | 48332 | [Error: < 20 cases or controls]            |
| 281.9 Deficiency ; NA  | NA | NA | NA | 46429 | 11 | 46418 | [Error: < 20 cases or controls]            |
| 573.1 Chronic pas NA   | NA | NA | NA | 41907 | 9  | 41898 | [Error: < 20 cases or controls]            |
| 184.2 Cancer of o NA   | NA | NA | NA | 48215 | 2  | 48213 | [Error: < 20 cases or controls]            |
| 218.2 Other beniç NA   | NA | NA | NA | 47598 | NA | NA    | [Error: non-varying phenotype or genotype] |
| 598.4 Other cells NA   | NA | NA | NA | 48078 | 8  | 48070 | [Error: < 20 cases or controls]            |
| 626.1 Irregular m NA   | NA | NA | NA | 48253 | 1  | 48252 | [Error: < 20 cases or controls]            |
| 134.1 Intestinal h NA  | NA | NA | NA | 47798 | 12 | 47786 | [Error: < 20 cases or controls]            |
| 260.7 Polyphagia NA    | NA | NA | NA | 44725 | 4  | 44721 | [Error: < 20 cases or controls]            |
| 986 Toxic effect NA    | NA | NA | NA | 48033 | 16 | 48017 | [Error: < 20 cases or controls]            |
| 716.8 Palindromic NA   | NA | NA | NA | 44702 | 15 | 44687 | [Error: < 20 cases or controls]            |



|                     |    |    |    |       |    |       |                                            |
|---------------------|----|----|----|-------|----|-------|--------------------------------------------|
| 938.1 Acute derm    | NA | NA | NA | 42763 | 15 | 42748 | [Error: < 20 cases or controls]            |
| 253.7 Other disor   | NA | NA | NA | 44801 | 16 | 44785 | [Error: < 20 cases or controls]            |
| 131 Protozoan i     | NA | NA | NA | 47796 | 10 | 47786 | [Error: < 20 cases or controls]            |
| 443.7 Peripheral i  | NA | NA | NA | 45672 | 9  | 45663 | [Error: < 20 cases or controls]            |
| 510.2 Lung transp   | NA | NA | NA | 46349 | 10 | 46339 | [Error: < 20 cases or controls]            |
| 560.2 Impaction c   | NA | NA | NA | 40970 | 13 | 40957 | [Error: < 20 cases or controls]            |
| 573.2 Liver replac  | NA | NA | NA | 41913 | 15 | 41898 | [Error: < 20 cases or controls]            |
| 586.11 Small kidne  | NA | NA | NA | 44648 | 4  | 44644 | [Error: < 20 cases or controls]            |
| 283 Acquired h      | NA | NA | NA | 46431 | 13 | 46418 | [Error: < 20 cases or controls]            |
| 642 Hypertensio     | NA | NA | NA | 48342 | 2  | 48340 | [Error: < 20 cases or controls]            |
| 711.3 Behcet's sy   | NA | NA | NA | 44702 | 15 | 44687 | [Error: < 20 cases or controls]            |
| 647.3 Major puer    | NA | NA | NA | 48341 | 1  | 48340 | [Error: < 20 cases or controls]            |
| 132.1 Pediculosis   | NA | NA | NA | 47790 | 4  | 47786 | [Error: < 20 cases or controls]            |
| 712 Infective co    | NA | NA | NA | 44701 | 14 | 44687 | [Error: < 20 cases or controls]            |
| 519.1 Tracheosto    | NA | NA | NA | 46624 | 16 | 46608 | [Error: < 20 cases or controls]            |
| 433.32 Moyamoya     | NA | NA | NA | 44974 | 7  | 44967 | [Error: < 20 cases or controls]            |
| 704.12 Telogen eff  | NA | NA | NA | 46224 | 5  | 46219 | [Error: < 20 cases or controls]            |
| 618.1 Prolapse of   | NA | NA | NA | 48339 | NA | NA    | [Error: non-varying phenotype or genotype] |
| 626.4 Premenstru    | NA | NA | NA | 48252 | NA | NA    | [Error: non-varying phenotype or genotype] |
| 965.3 Salicylates c | NA | NA | NA | 45851 | 9  | 45842 | [Error: < 20 cases or controls]            |
| 324.1 Jakob-Creu    | NA | NA | NA | 47978 | 1  | 47977 | [Error: < 20 cases or controls]            |
| 611.11 Mammogra     | NA | NA | NA | 47858 | NA | NA    | [Error: non-varying phenotype or genotype] |
| 636.1 Threatened    | NA | NA | NA | 48332 | NA | NA    | [Error: non-varying phenotype or genotype] |
| 282.8 Other hem     | NA | NA | NA | 46427 | 9  | 46418 | [Error: < 20 cases or controls]            |
| 985 Toxic effect    | NA | NA | NA | 48020 | 3  | 48017 | [Error: < 20 cases or controls]            |
| 292.12 Symbolic d   | NA | NA | NA | 43804 | 18 | 43786 | [Error: < 20 cases or controls]            |
| 222 Benign neo      | NA | NA | NA | 46617 | 12 | 46605 | [Error: < 20 cases or controls]            |
| 283.21 Hemolytic-i  | NA | NA | NA | 46419 | 1  | 46418 | [Error: < 20 cases or controls]            |
| 626.2 Dysmenorri    | NA | NA | NA | 48254 | 2  | 48252 | [Error: < 20 cases or controls]            |
| 656.9 Neonatal b    | NA | NA | NA | 48231 | NA | NA    | [Error: non-varying phenotype or genotype] |
| 627.1 Postmenop     | NA | NA | NA | 48252 | NA | NA    | [Error: non-varying phenotype or genotype] |
| 750.22 Congenital   | NA | NA | NA | 47442 | 19 | 47423 | [Error: < 20 cases or controls]            |
| 976 Poisoning b     | NA | NA | NA | 45847 | 5  | 45842 | [Error: < 20 cases or controls]            |

|        |               |    |    |    |    |       |    |       |                                            |
|--------|---------------|----|----|----|----|-------|----|-------|--------------------------------------------|
| 710.2  | Periostitis   | NA | NA | NA | NA | 44688 | 1  | 44687 | [Error: < 20 cases or controls]            |
| 221    | Benign neo    | NA | NA | NA | NA | 47531 | 1  | 47530 | [Error: < 20 cases or controls]            |
| 656.4  | Hemorrhag     | NA | NA | NA | NA | 48233 | 2  | 48231 | [Error: < 20 cases or controls]            |
| 628    | Ovarian cys   | NA | NA | NA | NA | 48254 | 2  | 48252 | [Error: < 20 cases or controls]            |
| 8.7    | Intestinal ir | NA | NA | NA | NA | 47656 | 8  | 47648 | [Error: < 20 cases or controls]            |
| 622    | Polyp of fer  | NA | NA | NA | NA | 48342 | NA | NA    | [Error: non-varying phenotype or genotype] |
| 750.11 | Esophageal    | NA | NA | NA | NA | 47440 | 17 | 47423 | [Error: < 20 cases or controls]            |
| 145.4  | Cancer of tl  | NA | NA | NA | NA | 47697 | 3  | 47694 | [Error: < 20 cases or controls]            |
| 270.31 | Polyclonal †  | NA | NA | NA | NA | 47296 | 3  | 47293 | [Error: < 20 cases or controls]            |
| 965.2  | Antirheumæ    | NA | NA | NA | NA | 45847 | 5  | 45842 | [Error: < 20 cases or controls]            |
| 984    | Toxic effect  | NA | NA | NA | NA | 48019 | 2  | 48017 | [Error: < 20 cases or controls]            |
| 823    | Fracture of   | NA | NA | NA | NA | 41368 | NA | NA    | [Error: non-varying phenotype or genotype] |
| 446.1  | Thromboar     | NA | NA | NA | NA | 45667 | 4  | 45663 | [Error: < 20 cases or controls]            |
| 610.3  | Fibrosclero:  | NA | NA | NA | NA | 47858 | NA | NA    | [Error: non-varying phenotype or genotype] |
| 695.22 | Pemphigus     | NA | NA | NA | NA | 44223 | 19 | 44204 | [Error: < 20 cases or controls]            |
| 610.8  | Other speci   | NA | NA | NA | NA | 47859 | 1  | 47858 | [Error: < 20 cases or controls]            |
| 262    | Mineral def   | NA | NA | NA | NA | 44725 | 4  | 44721 | [Error: < 20 cases or controls]            |
| 368.5  | Color visior  | NA | NA | NA | NA | 46242 | 4  | 46238 | [Error: < 20 cases or controls]            |
| 256    | Ovarian dys   | NA | NA | NA | NA | 44793 | 8  | 44785 | [Error: < 20 cases or controls]            |
| 256.1  | Hyperestro    | NA | NA | NA | NA | 44787 | 2  | 44785 | [Error: < 20 cases or controls]            |
| 281.13 | Folate-defic  | NA | NA | NA | NA | 46424 | 6  | 46418 | [Error: < 20 cases or controls]            |
| 134    | Helminthia:   | NA | NA | NA | NA | 47805 | 19 | 47786 | [Error: < 20 cases or controls]            |
| 964    | Poisoning b   | NA | NA | NA | NA | 45860 | 18 | 45842 | [Error: < 20 cases or controls]            |
| 365.5  | Pseudoexfc    | NA | NA | NA | NA | 45448 | 14 | 45434 | [Error: < 20 cases or controls]            |
| 687.3  | Changes in    | NA | NA | NA | NA | 41574 | 5  | 41569 | [Error: < 20 cases or controls]            |
| 972.2  | Antilipemic   | NA | NA | NA | NA | 45844 | 2  | 45842 | [Error: < 20 cases or controls]            |
| 643    | Excessive vi  | NA | NA | NA | NA | 48344 | 1  | 48343 | [Error: < 20 cases or controls]            |
| 184.11 | Malignant r   | NA | NA | NA | NA | 48216 | 3  | 48213 | [Error: < 20 cases or controls]            |
| 258    | Iatrogenic ε  | NA | NA | NA | NA | 44795 | 10 | 44785 | [Error: < 20 cases or controls]            |
| 500.1  | Extrinsic all | NA | NA | NA | NA | 43810 | 9  | 43801 | [Error: < 20 cases or controls]            |
| 622.2  | Mucous po     | NA | NA | NA | NA | 48342 | NA | NA    | [Error: non-varying phenotype or genotype] |
| 610.2  | Fibroadeno    | NA | NA | NA | NA | 47858 | NA | NA    | [Error: non-varying phenotype or genotype] |
| 180.1  | Cervical car  | NA | NA | NA | NA | 48207 | 2  | 48205 | [Error: < 20 cases or controls]            |

|                      |    |    |    |       |    |       |                                            |
|----------------------|----|----|----|-------|----|-------|--------------------------------------------|
| 626.21 Mittelschm    | NA | NA | NA | 48253 | 1  | 48252 | [Error: < 20 cases or controls]            |
| 649 Other cond       | NA | NA | NA | 48338 | 2  | 48336 | [Error: < 20 cases or controls]            |
| 656.2 Respiratory    | NA | NA | NA | 48248 | 17 | 48231 | [Error: < 20 cases or controls]            |
| 613.9 Breast diso    | NA | NA | NA | 48235 | 2  | 48233 | [Error: < 20 cases or controls]            |
| 647.1 Infections c   | NA | NA | NA | 48341 | 1  | 48340 | [Error: < 20 cases or controls]            |
| 41.21 Rheumatic      | NA | NA | NA | 47164 | 5  | 47159 | [Error: < 20 cases or controls]            |
| 289.3 Personal hi    | NA | NA | NA | 43834 | 13 | 43821 | [Error: < 20 cases or controls]            |
| 674 Other comf       | NA | NA | NA | 48335 | NA | NA    | [Error: non-varying phenotype or genotype] |
| 714.2 Juvenile rh    | NA | NA | NA | 44632 | 17 | 44615 | [Error: < 20 cases or controls]            |
| 757 Congenital       | NA | NA | NA | 47215 | 6  | 47209 | [Error: < 20 cases or controls]            |
| 960.3 Poisoning b    | NA | NA | NA | 45843 | 1  | 45842 | [Error: < 20 cases or controls]            |
| 520.1 Hereditary     | NA | NA | NA | 45851 | 9  | 45842 | [Error: < 20 cases or controls]            |
| 180.3 Cervical int   | NA | NA | NA | 48208 | 3  | 48205 | [Error: < 20 cases or controls]            |
| 618.6 Vaginal ent    | NA | NA | NA | 48339 | NA | NA    | [Error: non-varying phenotype or genotype] |
| 285.8 Hemoglobin     | NA | NA | NA | 46425 | 7  | 46418 | [Error: < 20 cases or controls]            |
| 783.1 Postproced     | NA | NA | NA | 44510 | 16 | 44494 | [Error: < 20 cases or controls]            |
| 204.3 Monocytic      | NA | NA | NA | 47142 | 9  | 47133 | [Error: < 20 cases or controls]            |
| 264.2 Failure to t   | NA | NA | NA | 44737 | 16 | 44721 | [Error: < 20 cases or controls]            |
| 526.8 Exostosis o    | NA | NA | NA | 45845 | 3  | 45842 | [Error: < 20 cases or controls]            |
| 743.22 Pathologic    | NA | NA | NA | 46970 | 11 | 46959 | [Error: < 20 cases or controls]            |
| 453 Chronic ver      | NA | NA | NA | 43133 | 5  | 43128 | [Error: < 20 cases or controls]            |
| 556.11 Angiodyspl    | NA | NA | NA | 40972 | 15 | 40957 | [Error: < 20 cases or controls]            |
| 619.1 Noninflamr     | NA | NA | NA | 48331 | NA | NA    | [Error: non-varying phenotype or genotype] |
| 795.81 Elevated ca   | NA | NA | NA | 48203 | 9  | 48194 | [Error: < 20 cases or controls]            |
| 723.1 Torticollis    | NA | NA | NA | 41795 | 19 | 41776 | [Error: < 20 cases or controls]            |
| 303.31 Gastrointes   | NA | NA | NA | 36258 | 18 | 36240 | [Error: < 20 cases or controls]            |
| 624.1 Dystrophy c    | NA | NA | NA | 48282 | NA | NA    | [Error: non-varying phenotype or genotype] |
| 614.4 Inflammatic    | NA | NA | NA | 48336 | 1  | 48335 | [Error: < 20 cases or controls]            |
| 522.1 Pulpitis and   | NA | NA | NA | 45857 | 15 | 45842 | [Error: < 20 cases or controls]            |
| 614.51 Cervicitis ar | NA | NA | NA | 48335 | NA | NA    | [Error: non-varying phenotype or genotype] |
| 614.3 Pelvic inflar  | NA | NA | NA | 48335 | NA | NA    | [Error: non-varying phenotype or genotype] |
| 795.82 Elevated ca   | NA | NA | NA | 48194 | NA | NA    | [Error: non-varying phenotype or genotype] |
| 710.3 Osteopathy     | NA | NA | NA | 44687 | NA | NA    | [Error: non-varying phenotype or genotype] |

|                     |    |    |    |       |    |       |                                            |
|---------------------|----|----|----|-------|----|-------|--------------------------------------------|
| 634.1 Missed abo    | NA | NA | NA | 48334 | 2  | 48332 | [Error: < 20 cases or controls]            |
| 283.2 Non-autoin    | NA | NA | NA | 46423 | 5  | 46418 | [Error: < 20 cases or controls]            |
| 325 Phlebitis an    | NA | NA | NA | 47993 | 16 | 47977 | [Error: < 20 cases or controls]            |
| 81.11 Acute graft   | NA | NA | NA | 47808 | 1  | 47807 | [Error: < 20 cases or controls]            |
| 614.1 Pelvic perit  | NA | NA | NA | 48335 | NA | NA    | [Error: non-varying phenotype or genotype] |
| 225.2 Benign neo    | NA | NA | NA | 47670 | 8  | 47662 | [Error: < 20 cases or controls]            |
| 580.13 Acute glom   | NA | NA | NA | 44654 | 10 | 44644 | [Error: < 20 cases or controls]            |
| 635.3 Placenta pr   | NA | NA | NA | 48332 | NA | NA    | [Error: non-varying phenotype or genotype] |
| 261.1 Vitamin A d   | NA | NA | NA | 44723 | 2  | 44721 | [Error: < 20 cases or controls]            |
| 446.5 Giant cell a  | NA | NA | NA | 45670 | 7  | 45663 | [Error: < 20 cases or controls]            |
| 656.5 Hematologi    | NA | NA | NA | 48233 | 2  | 48231 | [Error: < 20 cases or controls]            |
| 618 Genital pro     | NA | NA | NA | 48342 | 3  | 48339 | [Error: < 20 cases or controls]            |
| 394.3 Aortic valve  | NA | NA | NA | 45800 | 15 | 45785 | [Error: < 20 cases or controls]            |
| 586.12 Vesicouretr  | NA | NA | NA | 44658 | 14 | 44644 | [Error: < 20 cases or controls]            |
| 79.1 Varicella int  | NA | NA | NA | 41111 | 9  | 41102 | [Error: < 20 cases or controls]            |
| 622.1 Polyp of col  | NA | NA | NA | 48342 | NA | NA    | [Error: non-varying phenotype or genotype] |
| 626.11 Absent or ir | NA | NA | NA | 48252 | NA | NA    | [Error: non-varying phenotype or genotype] |
| 371.33 Noninfectic  | NA | NA | NA | 43102 | 4  | 43098 | [Error: < 20 cases or controls]            |
| 284.2 Constitutio   | NA | NA | NA | 46419 | 1  | 46418 | [Error: < 20 cases or controls]            |
| 285.3 Sideroblast   | NA | NA | NA | 46420 | 2  | 46418 | [Error: < 20 cases or controls]            |
| 389.5 Disorders o   | NA | NA | NA | 44238 | 15 | 44223 | [Error: < 20 cases or controls]            |
| 627.3 Postmenop     | NA | NA | NA | 48252 | NA | NA    | [Error: non-varying phenotype or genotype] |
| 749.2 Congenital    | NA | NA | NA | 48172 | 18 | 48154 | [Error: < 20 cases or controls]            |
| 251.8 Abnormalit    | NA | NA | NA | 44788 | 3  | 44785 | [Error: < 20 cases or controls]            |
| 736.3 Acquired d    | NA | NA | NA | 45561 | 3  | 45558 | [Error: < 20 cases or controls]            |
| 254 Diseases of     | NA | NA | NA | 44796 | 11 | 44785 | [Error: < 20 cases or controls]            |
| 255.22 Mineraloco   | NA | NA | NA | 44799 | 14 | 44785 | [Error: < 20 cases or controls]            |
| 277.2 Other disor   | NA | NA | NA | 47397 | 2  | 47395 | [Error: < 20 cases or controls]            |
| 759.1 Anomalies     | NA | NA | NA | 47222 | 13 | 47209 | [Error: < 20 cases or controls]            |
| 275.2 Disorders o   | NA | NA | NA | 47072 | 13 | 47059 | [Error: < 20 cases or controls]            |
| 255.3 Adrenogeni    | NA | NA | NA | 44801 | 16 | 44785 | [Error: < 20 cases or controls]            |
| 174.3 Neoplasm c    | NA | NA | NA | 48146 | 1  | 48145 | [Error: < 20 cases or controls]            |
| 627.2 Symptomat     | NA | NA | NA | 48259 | 7  | 48252 | [Error: < 20 cases or controls]            |

|                      |    |    |    |       |    |       |                                            |
|----------------------|----|----|----|-------|----|-------|--------------------------------------------|
| 634.3 Ectopic pre    | NA | NA | NA | 48332 | NA | NA    | [Error: non-varying phenotype or genotype] |
| 964.1 Anticoagula    | NA | NA | NA | 45851 | 9  | 45842 | [Error: < 20 cases or controls]            |
| 218.1 Uterine lei    | NA | NA | NA | 47598 | NA | NA    | [Error: non-varying phenotype or genotype] |
| 962.3 Hormones       | NA | NA | NA | 45852 | 10 | 45842 | [Error: < 20 cases or controls]            |
| 619 Noninflamr       | NA | NA | NA | 48334 | 3  | 48331 | [Error: < 20 cases or controls]            |
| 654 Other and        | NA | NA | NA | 48335 | NA | NA    | [Error: non-varying phenotype or genotype] |
| 625.1 Dyspareuni     | NA | NA | NA | 48284 | 2  | 48282 | [Error: < 20 cases or controls]            |
| 870.8 Open woun      | NA | NA | NA | 43283 | 13 | 43270 | [Error: < 20 cases or controls]            |
| 368.7 Disorders o    | NA | NA | NA | 46242 | 4  | 46238 | [Error: < 20 cases or controls]            |
| 626.13 Irregular m   | NA | NA | NA | 48252 | NA | NA    | [Error: non-varying phenotype or genotype] |
| 656.26 Transitory t  | NA | NA | NA | 48233 | 2  | 48231 | [Error: < 20 cases or controls]            |
| 285.22 Anemia in r   | NA | NA | NA | 46430 | 12 | 46418 | [Error: < 20 cases or controls]            |
| 874 Complicatio      | NA | NA | NA | 43284 | 14 | 43270 | [Error: < 20 cases or controls]            |
| 618.5 Prolapse of    | NA | NA | NA | 48339 | NA | NA    | [Error: non-varying phenotype or genotype] |
| 626.14 Irregular m   | NA | NA | NA | 48252 | NA | NA    | [Error: non-varying phenotype or genotype] |
| 627.5 Premature      | NA | NA | NA | 48254 | 2  | 48252 | [Error: < 20 cases or controls]            |
| 592.13 Chronic int   | NA | NA | NA | 43665 | 12 | 43653 | [Error: < 20 cases or controls]            |
| 286.3 Coagulator     | NA | NA | NA | 45250 | NA | NA    | [Error: non-varying phenotype or genotype] |
| 614.31 Acute inflar  | NA | NA | NA | 48335 | NA | NA    | [Error: non-varying phenotype or genotype] |
| 656.22 Interstitial  | NA | NA | NA | 48232 | 1  | 48231 | [Error: < 20 cases or controls]            |
| 613.7 Other signs    | NA | NA | NA | 48243 | 10 | 48233 | [Error: < 20 cases or controls]            |
| 960.1 Adverse eff    | NA | NA | NA | 45855 | 13 | 45842 | [Error: < 20 cases or controls]            |
| 536.7 Complicatio    | NA | NA | NA | 45820 | 17 | 45803 | [Error: < 20 cases or controls]            |
| 753.2 Congenital     | NA | NA | NA | 47902 | 8  | 47894 | [Error: < 20 cases or controls]            |
| 614.33 Pelvic inflar | NA | NA | NA | 48335 | NA | NA    | [Error: non-varying phenotype or genotype] |
| 653 Problems a       | NA | NA | NA | 48336 | 1  | 48335 | [Error: < 20 cases or controls]            |
| 529.6 Glossodyn      | NA | NA | NA | 46940 | 13 | 46927 | [Error: < 20 cases or controls]            |
| 671 Venous/cer       | NA | NA | NA | 48335 | NA | NA    | [Error: non-varying phenotype or genotype] |
| 523.32 Chronic per   | NA | NA | NA | 45860 | 18 | 45842 | [Error: < 20 cases or controls]            |
| 627.4 Premenopa      | NA | NA | NA | 48252 | NA | NA    | [Error: non-varying phenotype or genotype] |
| 521.4 Tooth com      | NA | NA | NA | 45847 | 5  | 45842 | [Error: < 20 cases or controls]            |
| 656.6 Perinatal di   | NA | NA | NA | 48234 | 3  | 48231 | [Error: < 20 cases or controls]            |
| 751.11 Congenital    | NA | NA | NA | 47425 | 2  | 47423 | [Error: < 20 cases or controls]            |

|                    |    |    |    |       |    |       |                                            |
|--------------------|----|----|----|-------|----|-------|--------------------------------------------|
| 446.2 Acute febril | NA | NA | NA | 45665 | 2  | 45663 | [Error: < 20 cases or controls]            |
| 446.6 Polyarteriti | NA | NA | NA | 45668 | 5  | 45663 | [Error: < 20 cases or controls]            |
| 729.1 Rheumatism   | NA | NA | NA | 40017 | 1  | 40016 | [Error: < 20 cases or controls]            |
| 610 Benign mar     | NA | NA | NA | 47863 | 5  | 47858 | [Error: < 20 cases or controls]            |
| 261.3 Vitamin C d  | NA | NA | NA | 44722 | 1  | 44721 | [Error: < 20 cases or controls]            |
| 242.31 Thyrotoxic  | NA | NA | NA | 44825 | 11 | 44814 | [Error: < 20 cases or controls]            |
| 741.6 Villonodula  | NA | NA | NA | 43378 | 17 | 43361 | [Error: < 20 cases or controls]            |
| 749.1 Cleft palate | NA | NA | NA | 44863 | 14 | 44849 | [Error: < 20 cases or controls]            |
| 244.3 Iodine hypc  | NA | NA | NA | 44818 | 4  | 44814 | [Error: < 20 cases or controls]            |
| 857 Mechanical     | NA | NA | NA | 46809 | 19 | 46790 | [Error: < 20 cases or controls]            |
| 602.3 Dysplasia o  | NA | NA | NA | 41314 | 6  | 41308 | [Error: < 20 cases or controls]            |
| 939.1 Contact anc  | NA | NA | NA | 42752 | 4  | 42748 | [Error: < 20 cases or controls]            |
| 974 Poisoning b    | NA | NA | NA | 45851 | 9  | 45842 | [Error: < 20 cases or controls]            |
| 792.1 Papanicola   | NA | NA | NA | 48207 | 2  | 48205 | [Error: < 20 cases or controls]            |
| 272.14 Hyperchyl   | NA | NA | NA | 31766 | 9  | 31757 | [Error: < 20 cases or controls]            |
| 277.1 Disorders o  | NA | NA | NA | 47405 | 10 | 47395 | [Error: < 20 cases or controls]            |
| 627.21 Symptomati  | NA | NA | NA | 48252 | NA | NA    | [Error: non-varying phenotype or genotype] |
| 259.4 Precocious   | NA | NA | NA | 44795 | 10 | 44785 | [Error: < 20 cases or controls]            |
| 716.3 Kaschin-Ber  | NA | NA | NA | 44689 | 2  | 44687 | [Error: < 20 cases or controls]            |
| 220 Benign neo     | NA | NA | NA | 47646 | NA | NA    | [Error: non-varying phenotype or genotype] |
| 289.1 Myelofibro   | NA | NA | NA | 43825 | 4  | 43821 | [Error: < 20 cases or controls]            |
| 271.9 Other disor  | NA | NA | NA | 48271 | 10 | 48261 | [Error: < 20 cases or controls]            |
| 644 Anemia dur     | NA | NA | NA | 48343 | NA | NA    | [Error: non-varying phenotype or genotype] |
| 957 Injury to ot   | NA | NA | NA | 48255 | 8  | 48247 | [Error: < 20 cases or controls]            |
| 795.8 Abnormal t   | NA | NA | NA | 48210 | 16 | 48194 | [Error: < 20 cases or controls]            |
| 256.4 Polycystic c | NA | NA | NA | 44788 | 3  | 44785 | [Error: < 20 cases or controls]            |
| 279.8 Other speci  | NA | NA | NA | 46884 | 15 | 46869 | [Error: < 20 cases or controls]            |
| 613.8 Other speci  | NA | NA | NA | 48235 | 2  | 48233 | [Error: < 20 cases or controls]            |
| 636.8 Cervical inc | NA | NA | NA | 48332 | NA | NA    | [Error: non-varying phenotype or genotype] |
| 750.13 Congenital  | NA | NA | NA | 47433 | 10 | 47423 | [Error: < 20 cases or controls]            |
| 216.1 Screening f  | NA | NA | NA | 44456 | NA | NA    | [Error: non-varying phenotype or genotype] |
| 361.2 Retinoschis  | NA | NA | NA | 45446 | 12 | 45434 | [Error: < 20 cases or controls]            |
| 323.2 Acute (tran  | NA | NA | NA | 47988 | 11 | 47977 | [Error: < 20 cases or controls]            |

|                     |    |    |    |       |    |       |                                            |
|---------------------|----|----|----|-------|----|-------|--------------------------------------------|
| 696.2 Parapsoriasis | NA | NA | NA | 44212 | 8  | 44204 | [Error: < 20 cases or controls]            |
| 425.8 Other cardi   | NA | NA | NA | 46866 | 11 | 46855 | [Error: < 20 cases or controls]            |
| 655.1 Abnormalit    | NA | NA | NA | 48294 | 15 | 48279 | [Error: < 20 cases or controls]            |
| 258.1 Postablativ   | NA | NA | NA | 44785 | NA | NA    | [Error: non-varying phenotype or genotype] |
| 270.11 Disturbanc   | NA | NA | NA | 47297 | 4  | 47293 | [Error: < 20 cases or controls]            |
| 737.2 Lordosis (ac  | NA | NA | NA | 45562 | 4  | 45558 | [Error: < 20 cases or controls]            |
| 792 Abnormal F      | NA | NA | NA | 48208 | 3  | 48205 | [Error: < 20 cases or controls]            |
| 117.3 Blastomyco    | NA | NA | NA | 45082 | 14 | 45068 | [Error: < 20 cases or controls]            |
| 350.5 Abnormal r    | NA | NA | NA | 46181 | 17 | 46164 | [Error: < 20 cases or controls]            |
| 695.1 Toxic erythr  | NA | NA | NA | 44219 | 15 | 44204 | [Error: < 20 cases or controls]            |
| 260.22 Nutritional  | NA | NA | NA | 44728 | 7  | 44721 | [Error: < 20 cases or controls]            |
| 618.2 Uterine/Utr   | NA | NA | NA | 48339 | NA | NA    | [Error: non-varying phenotype or genotype] |
| 316.1 Polyneurop    | NA | NA | NA | 39563 | 9  | 39554 | [Error: < 20 cases or controls]            |
| 459.7 Blood vess    | NA | NA | NA | 46860 | 2  | 46858 | [Error: < 20 cases or controls]            |
| 614.32 Chronic infl | NA | NA | NA | 48335 | NA | NA    | [Error: non-varying phenotype or genotype] |
| 647 Infectious a    | NA | NA | NA | 48341 | 1  | 48340 | [Error: < 20 cases or controls]            |
| 180 Cervical car    | NA | NA | NA | 48210 | 5  | 48205 | [Error: < 20 cases or controls]            |
| 300.2 Generalizec   | NA | NA | NA | 36240 | NA | NA    | [Error: non-varying phenotype or genotype] |
| 360.3 Hypotony c    | NA | NA | NA | 45451 | 17 | 45434 | [Error: < 20 cases or controls]            |
| 623 Hypertroph      | NA | NA | NA | 48342 | NA | NA    | [Error: non-varying phenotype or genotype] |
| 627 Menopausa       | NA | NA | NA | 48261 | 9  | 48252 | [Error: < 20 cases or controls]            |
| 564.9 Personal hi   | NA | NA | NA | 40959 | 2  | 40957 | [Error: < 20 cases or controls]            |
| 283.1 Autoimmun     | NA | NA | NA | 46425 | 7  | 46418 | [Error: < 20 cases or controls]            |
| 575.9 Nonspecific   | NA | NA | NA | 47150 | 16 | 47134 | [Error: < 20 cases or controls]            |
| 736.5 Acquired d    | NA | NA | NA | 45563 | 5  | 45558 | [Error: < 20 cases or controls]            |
| 182 Malignant r     | NA | NA | NA | 48218 | 2  | 48216 | [Error: < 20 cases or controls]            |
| 531.5 Gastrojejun   | NA | NA | NA | 47340 | 3  | 47337 | [Error: < 20 cases or controls]            |
| 624 Symptoms i      | NA | NA | NA | 48282 | NA | NA    | [Error: non-varying phenotype or genotype] |
| 750.15 Congenital   | NA | NA | NA | 47429 | 6  | 47423 | [Error: < 20 cases or controls]            |
| 619.5 Noninflamr    | NA | NA | NA | 48332 | 1  | 48331 | [Error: < 20 cases or controls]            |
| 636 Early or thr    | NA | NA | NA | 48333 | 1  | 48332 | [Error: < 20 cases or controls]            |
| 669 Complicatic     | NA | NA | NA | 48343 | 1  | 48342 | [Error: < 20 cases or controls]            |
| 753.1 Congenital    | NA | NA | NA | 47904 | 10 | 47894 | [Error: < 20 cases or controls]            |

|                       |    |    |    |          |    |       |                                            |
|-----------------------|----|----|----|----------|----|-------|--------------------------------------------|
| 625 Pain and ot NA    | NA | NA | NA | 48291    | 9  | 48282 | [Error: < 20 cases or controls]            |
| 756.1 Congenital NA   | NA | NA | NA | 47753    | 17 | 47736 | [Error: < 20 cases or controls]            |
| 614.5 Inflammato NA   | NA | NA | NA | 48336    | 1  | 48335 | [Error: < 20 cases or controls]            |
| 244.5 Congenital NA   | NA | NA | NA | 44829    | 15 | 44814 | [Error: < 20 cases or controls]            |
| 626.12 Excessive o NA | NA | NA | NA | 48253    | 1  | 48252 | [Error: < 20 cases or controls]            |
| 550.3 Femoral he NA   | NA | NA | NA | 44978    | 11 | 44967 | [Error: < 20 cases or controls]            |
| 480.2 Viral pneun NA  | NA | NA | NA | 42160    | 16 | 42144 | [Error: < 20 cases or controls]            |
| 704.2 Hirsutism NA    | NA | NA | NA | 46224    | 5  | 46219 | [Error: < 20 cases or controls]            |
| 973 Poisoning b NA    | NA | NA | NA | 45846    | 4  | 45842 | [Error: < 20 cases or controls]            |
| 250.15 Diabetes ty NA | NA | NA | NA | 39944    | 14 | 39930 | [Error: < 20 cases or controls]            |
| 619.4 Noninflamr NA   | NA | NA | NA | 48331 NA | NA |       | [Error: non-varying phenotype or genotype] |
| 767 Cervicocrar NA    | NA | NA | NA | 44578    | 18 | 44560 | [Error: < 20 cases or controls]            |
| 90.3 Venereal di NA   | NA | NA | NA | 47846    | 6  | 47840 | [Error: < 20 cases or controls]            |
| 656.7 Conditions NA   | NA | NA | NA | 48232    | 1  | 48231 | [Error: < 20 cases or controls]            |
| 588.2 Secondary l NA  | NA | NA | NA | 44656    | 12 | 44644 | [Error: < 20 cases or controls]            |
| 31 Diseases du NA     | NA | NA | NA | 47169    | 10 | 47159 | [Error: < 20 cases or controls]            |
| 942 Infusion an NA    | NA | NA | NA | 42760    | 12 | 42748 | [Error: < 20 cases or controls]            |
| 654.2 Rhesus isoi NA  | NA | NA | NA | 48337    | 2  | 48335 | [Error: < 20 cases or controls]            |
| 656.3 Endocrine ε NA  | NA | NA | NA | 48234    | 3  | 48231 | [Error: < 20 cases or controls]            |
| 676 Other disor NA    | NA | NA | NA | 48335 NA | NA |       | [Error: non-varying phenotype or genotype] |
| 755.3 Congenital NA   | NA | NA | NA | 47741    | 5  | 47736 | [Error: < 20 cases or controls]            |
| 270.35 Macroglobi NA  | NA | NA | NA | 47305    | 12 | 47293 | [Error: < 20 cases or controls]            |
| 755.61 Congenital NA  | NA | NA | NA | 47750    | 14 | 47736 | [Error: < 20 cases or controls]            |
| 286.11 Von willebr NA | NA | NA | NA | 45268    | 18 | 45250 | [Error: < 20 cases or controls]            |
| 394.4 Acute rheu NA   | NA | NA | NA | 45793    | 8  | 45785 | [Error: < 20 cases or controls]            |
| 260.21 Kwashiorko NA  | NA | NA | NA | 44723    | 2  | 44721 | [Error: < 20 cases or controls]            |
| 569.1 Toxic gastrc NA | NA | NA | NA | 44951    | 7  | 44944 | [Error: < 20 cases or controls]            |
| 636.3 Hemorrhag NA    | NA | NA | NA | 48333    | 1  | 48332 | [Error: < 20 cases or controls]            |
| 619.3 Noninflamr NA   | NA | NA | NA | 48332    | 1  | 48331 | [Error: < 20 cases or controls]            |
| 646 Other comf NA     | NA | NA | NA | 48337    | 1  | 48336 | [Error: < 20 cases or controls]            |
| 270.12 Phenylketo NA  | NA | NA | NA | 47299    | 6  | 47293 | [Error: < 20 cases or controls]            |
| 755.4 Congenital NA   | NA | NA | NA | 47745    | 9  | 47736 | [Error: < 20 cases or controls]            |
| 38.1 Gram negat NA    | NA | NA | NA | 47173    | 14 | 47159 | [Error: < 20 cases or controls]            |



|                    |    |    |    |       |    |       |                                            |
|--------------------|----|----|----|-------|----|-------|--------------------------------------------|
| 145.5 Cancer of t  | NA | NA | NA | 47704 | 10 | 47694 | [Error: < 20 cases or controls]            |
| 452.8 Postphlebit  | NA | NA | NA | 43140 | 12 | 43128 | [Error: < 20 cases or controls]            |
| 610.1 Cystic mast  | NA | NA | NA | 47858 | NA | NA    | [Error: non-varying phenotype or genotype] |
| 696.3 Pityriasis   | NA | NA | NA | 44218 | 14 | 44204 | [Error: < 20 cases or controls]            |
| 371.9 Chronic infl | NA | NA | NA | 43105 | 7  | 43098 | [Error: < 20 cases or controls]            |
| 635 Hemorrhag      | NA | NA | NA | 48332 | NA | NA    | [Error: non-varying phenotype or genotype] |
| 612.1 Galactorrhœ  | NA | NA | NA | 47858 | NA | NA    | [Error: non-varying phenotype or genotype] |
| 642.1 Preeclamps   | NA | NA | NA | 48341 | 1  | 48340 | [Error: < 20 cases or controls]            |
| 706.3 Seborrhea    | NA | NA | NA | 44571 | 2  | 44569 | [Error: < 20 cases or controls]            |
| 81.12 Chronic gra  | NA | NA | NA | 47814 | 7  | 47807 | [Error: < 20 cases or controls]            |
| 527.8 Other speci  | NA | NA | NA | 46936 | 9  | 46927 | [Error: < 20 cases or controls]            |
| 972.6 Antihypertœ  | NA | NA | NA | 45858 | 16 | 45842 | [Error: < 20 cases or controls]            |
| 736.4 Genu valgu   | NA | NA | NA | 45568 | 10 | 45558 | [Error: < 20 cases or controls]            |
| 731.1 Osteitis def | NA | NA | NA | 44439 | 16 | 44423 | [Error: < 20 cases or controls]            |
| 635.2 Antepartun   | NA | NA | NA | 48332 | NA | NA    | [Error: non-varying phenotype or genotype] |
| 271.3 Intestinal d | NA | NA | NA | 48272 | 11 | 48261 | [Error: < 20 cases or controls]            |
| 994.21 Septic choc | NA | NA | NA | 48147 | 14 | 48133 | [Error: < 20 cases or controls]            |
| 686.5 Pyoderma     | NA | NA | NA | 43213 | 7  | 43206 | [Error: < 20 cases or controls]            |
| 609.11 Azoosperm   | NA | NA | NA | 38814 | 11 | 38803 | [Error: < 20 cases or controls]            |
| 741.1 Ankylosis o' | NA | NA | NA | 43379 | 18 | 43361 | [Error: < 20 cases or controls]            |
| 117.2 Coccidioido  | NA | NA | NA | 45070 | 2  | 45068 | [Error: < 20 cases or controls]            |
| 149.3 Cancer of h  | NA | NA | NA | 47707 | 13 | 47694 | [Error: < 20 cases or controls]            |
| 209 Neuroendo      | NA | NA | NA | 48342 | 12 | 48330 | [Error: < 20 cases or controls]            |
| 695.81 Erythema n  | NA | NA | NA | 44213 | 9  | 44204 | [Error: < 20 cases or controls]            |
| 287.2 Allergic pur | NA | NA | NA | 45263 | 13 | 45250 | [Error: < 20 cases or controls]            |
| 537.1 Lesions of s | NA | NA | NA | 45807 | 4  | 45803 | [Error: < 20 cases or controls]            |
| 790.9 Abnormal a   | NA | NA | NA | 45227 | 1  | 45226 | [Error: < 20 cases or controls]            |
| 643.1 Hyperemes    | NA | NA | NA | 48344 | 1  | 48343 | [Error: < 20 cases or controls]            |
| 8.51 Intestinal e  | NA | NA | NA | 47648 | NA | NA    | [Error: non-varying phenotype or genotype] |
| 480.12 Pseudomor   | NA | NA | NA | 42160 | 16 | 42144 | [Error: < 20 cases or controls]            |
| 636.2 Early onset  | NA | NA | NA | 48332 | NA | NA    | [Error: non-varying phenotype or genotype] |
| 159.3 Malignant r  | NA | NA | NA | 46633 | 14 | 46619 | [Error: < 20 cases or controls]            |
| 446.7 Takayasu's   | NA | NA | NA | 45664 | 1  | 45663 | [Error: < 20 cases or controls]            |

|                    |    |    |    |       |   |                                       |
|--------------------|----|----|----|-------|---|---------------------------------------|
| 448 Disease of rNA | NA | NA | NA | 45672 | 9 | 45663 [Error: < 20 cases or controls] |
|--------------------|----|----|----|-------|---|---------------------------------------|

**Supplemental Table E2**

| phecode | description   | lower 95% | upper 95% | OR       | p         | n_total | n_cases | n_controls | note |
|---------|---------------|-----------|-----------|----------|-----------|---------|---------|------------|------|
| 278.1   | Obesity       | 1.377235  | 1.445526  | 1.410952 | 3.83E-171 | 67170   | 7271    | 59899      |      |
| 278.11  | Morbid obe    | 1.477305  | 1.568336  | 1.522144 | 4.88E-167 | 63575   | 3676    | 59899      |      |
| 428.1   | Congestive    | 1.629754  | 1.76763   | 1.697277 | 7.25E-144 | 69877   | 1352    | 68525      |      |
| 428     | Congestive    | 1.551164  | 1.671964  | 1.610441 | 5.68E-137 | 70336   | 1811    | 68525      |      |
| 415.2   | Chronic pul   | 1.730892  | 1.908016  | 1.817396 | 9.38E-128 | 71137   | 597     | 70540      |      |
| 627     | Menopausa     | 0.638023  | 0.683236  | 0.660347 | 8.79E-125 | 58330   | 7402    | 50928      |      |
| 415     | Pulmonary     | 1.587933  | 1.730264  | 1.657738 | 5.84E-118 | 71512   | 972     | 70540      |      |
| 278     | Overweight    | 1.269905  | 1.32756   | 1.298419 | 1.22E-117 | 69661   | 9762    | 59899      |      |
| 509     | Respiratory   | 1.574569  | 1.718443  | 1.645177 | 1.90E-110 | 69209   | 981     | 68228      |      |
| 465     | Acute uppe    | 0.707078  | 0.747833  | 0.727252 | 6.00E-110 | 62507   | 10911   | 51596      |      |
| 627.2   | Symptomat     | 0.609393  | 0.661881  | 0.635234 | 8.55E-103 | 55893   | 4965    | 50928      |      |
| 509.1   | Respiratory   | 1.623002  | 1.792087  | 1.705799 | 3.70E-99  | 68850   | 622     | 68228      |      |
| 465.2   | Acute phan    | 0.637842  | 0.691267  | 0.664154 | 1.69E-88  | 56993   | 5397    | 51596      |      |
| 496     | Chronic air   | 1.368046  | 1.465809  | 1.416183 | 5.81E-87  | 65560   | 2427    | 63133      |      |
| 714.1   | Rheumatoi     | 1.364517  | 1.462279  | 1.412705 | 2.29E-85  | 67138   | 2297    | 64841      |      |
| 745     | Pain in joint | 0.795481  | 0.829294  | 0.812266 | 2.30E-85  | 67923   | 20433   | 47490      |      |
| 318     | Tobacco us    | 1.283356  | 1.35725   | 1.319893 | 3.56E-84  | 69271   | 4714    | 64557      |      |
| 611     | Abnormal f    | 0.676692  | 0.726972  | 0.701507 | 9.41E-84  | 67990   | 6257    | 61733      |      |
| 476     | Allergic rhir | 0.722366  | 0.768864  | 0.745361 | 3.85E-76  | 61917   | 8115    | 53802      |      |
| 415.21  | Primary pul   | 1.662777  | 1.879577  | 1.768424 | 2.15E-74  | 70804   | 264     | 70540      |      |
| 714     | Rheumatoi     | 1.302572  | 1.388248  | 1.344877 | 2.52E-74  | 67955   | 3114    | 64841      |      |
| 416     | Cardiomega    | 1.430587  | 1.561889  | 1.495076 | 3.75E-72  | 71676   | 1136    | 70540      |      |
| 571     | Chronic live  | 1.31464   | 1.406239  | 1.359874 | 1.24E-71  | 67926   | 2736    | 65190      |      |
| 216     | Benign neo    | 0.593664  | 0.658503  | 0.625437 | 1.83E-70  | 69205   | 3319    | 65886      |      |
| 798     | Malaise anc   | 0.80828   | 0.843302  | 0.825663 | 3.93E-70  | 66111   | 19145   | 46966      |      |
| 571.5   | Other chroi   | 1.32297   | 1.41898   | 1.370368 | 1.28E-69  | 67682   | 2492    | 65190      |      |
| 464     | Acute sinus   | 0.692635  | 0.745581  | 0.718762 | 4.00E-69  | 57383   | 5787    | 51596      |      |
| 585.1   | Acute renal   | 1.530518  | 1.706614  | 1.616803 | 3.67E-67  | 68985   | 413     | 68572      |      |
| 611.1   | Abnormal r    | 0.66164   | 0.719834  | 0.690293 | 1.47E-66  | 66159   | 4426    | 61733      |      |
| 585     | Renal failur  | 1.346981  | 1.46287   | 1.404211 | 1.39E-58  | 69875   | 1303    | 68572      |      |
| 316     | Substance a   | 1.305221  | 1.40634   | 1.355248 | 1.78E-57  | 66957   | 2400    | 64557      |      |

|                     |          |          |          |          |       |       |       |
|---------------------|----------|----------|----------|----------|-------|-------|-------|
| 200 Myeloprolif     | 1.496842 | 1.678013 | 1.58594  | 1.36E-56 | 72108 | 368   | 71740 |
| 508 Pulmonary       | 1.290314 | 1.386966 | 1.338088 | 2.48E-56 | 70517 | 2289  | 68228 |
| 599 Other symp      | 0.7769   | 0.82143  | 0.798957 | 3.83E-56 | 68514 | 9775  | 58739 |
| 571.51 Cirrhosis of | 1.440871 | 1.598798 | 1.518576 | 5.45E-56 | 65846 | 656   | 65190 |
| 200.1 Polycyther    | 1.606536 | 1.841089 | 1.720895 | 3.69E-55 | 67794 | 187   | 67607 |
| 761 Cervicalgia     | 0.726596 | 0.780421 | 0.753171 | 1.64E-54 | 69917 | 6019  | 63898 |
| 250.2 Type 2 diab   | 1.196994 | 1.261704 | 1.229012 | 3.19E-53 | 68157 | 5999  | 62158 |
| 250 Diabetes m      | 1.190088 | 1.252649 | 1.221052 | 9.84E-53 | 68612 | 6454  | 62158 |
| 626 Disorders o     | 0.761287 | 0.810224 | 0.785488 | 4.01E-52 | 59473 | 8545  | 50928 |
| 702 Degenerati      | 0.673967 | 0.738263 | 0.705594 | 7.27E-51 | 67782 | 3850  | 63932 |
| 569.2 Gastrointes   | 1.309542 | 1.421366 | 1.364961 | 3.35E-50 | 69071 | 1510  | 67561 |
| 743.9 Osteopenia    | 0.685682 | 0.749231 | 0.716962 | 5.10E-49 | 67797 | 4035  | 63762 |
| 785 Abdominal       | 0.833983 | 0.87038  | 0.852047 | 7.16E-49 | 67656 | 18775 | 48881 |
| 427.9 Palpitations  | 0.734684 | 0.790653 | 0.762303 | 1.39E-47 | 64806 | 5927  | 58879 |
| 276.4 Acid-base b   | 1.466894 | 1.65842  | 1.561502 | 3.12E-46 | 64428 | 344   | 64084 |
| 428.3 Heart failur  | 1.47495  | 1.670544 | 1.570847 | 4.56E-46 | 68885 | 360   | 68525 |
| 539 Bariatric su    | 1.309661 | 1.428251 | 1.368552 | 8.42E-46 | 73031 | 1265  | 71766 |
| 208 Benign neo      | 0.71072  | 0.772118 | 0.740973 | 1.19E-45 | 71988 | 4390  | 67598 |
| 573.4 Acute and s   | 1.684596 | 1.995185 | 1.836786 | 1.47E-45 | 65264 | 74    | 65190 |
| 626.1 Irregular m   | 0.765238 | 0.817863 | 0.791247 | 2.55E-43 | 58148 | 7220  | 50928 |
| 743 Osteoporos      | 0.769533 | 0.821392 | 0.795182 | 3.61E-43 | 71105 | 7343  | 63762 |
| 611.3 Lump or ma    | 0.676021 | 0.745385 | 0.710093 | 5.97E-43 | 64923 | 3190  | 61733 |
| 507 Pleurisy; pl    | 1.339819 | 1.478854 | 1.40864  | 2.94E-42 | 69124 | 896   | 68228 |
| 702.2 Seborrhic     | 0.655363 | 0.729108 | 0.691524 | 7.05E-42 | 69920 | 2785  | 67135 |
| 272.13 Mixed hype   | 0.746418 | 0.80387  | 0.774785 | 1.82E-41 | 60330 | 5418  | 54912 |
| 173 Neoplasm c      | 0.679839 | 0.750373 | 0.714478 | 1.19E-40 | 69037 | 3243  | 65794 |
| 599.3 Dysuria       | 0.738538 | 0.798372 | 0.768055 | 3.09E-40 | 63610 | 4871  | 58739 |
| 509.8 Dependenc     | 1.557999 | 1.820044 | 1.686754 | 5.01E-40 | 68360 | 132   | 68228 |
| 367.1 Myopia        | 0.632479 | 0.71357  | 0.6721   | 3.90E-38 | 70302 | 2308  | 67994 |
| 792 Abnormal F      | 0.725129 | 0.789263 | 0.756708 | 4.89E-38 | 65914 | 4493  | 61421 |
| 327.3 Sleep apne    | 1.189065 | 1.265681 | 1.227044 | 8.63E-38 | 65355 | 3642  | 61713 |
| 571.8 Liver absce   | 1.422831 | 1.618269 | 1.519724 | 1.79E-37 | 65504 | 314   | 65190 |
| 276.41 Acidosis     | 1.434615 | 1.637182 | 1.535254 | 2.25E-37 | 64377 | 293   | 64084 |

|        |                |          |          |          |          |       |       |       |
|--------|----------------|----------|----------|----------|----------|-------|-------|-------|
| 726    | Peripheral c   | 0.774409 | 0.828897 | 0.801351 | 2.52E-37 | 65047 | 6160  | 58887 |
| 386.9  | Dizziness ar   | 0.751124 | 0.811224 | 0.780781 | 2.05E-36 | 68818 | 4855  | 63963 |
| 289.8  | Polycyther     | 1.466098 | 1.69081  | 1.577344 | 2.63E-36 | 65852 | 214   | 65638 |
| 286.2  | Encounter f    | 1.266448 | 1.382869 | 1.324077 | 5.44E-36 | 69731 | 1362  | 68369 |
| 792.1  | Papanicolac    | 0.71271  | 0.781512 | 0.746537 | 1.73E-35 | 65265 | 3844  | 61421 |
| 367    | Disorders o    | 0.707764 | 0.777703 | 0.742145 | 2.49E-35 | 71472 | 3478  | 67994 |
| 276.6  | Fluid overlc   | 1.477313 | 1.714803 | 1.594688 | 5.36E-35 | 64247 | 163   | 64084 |
| 610    | Benign mar     | 0.669146 | 0.747015 | 0.707307 | 6.25E-35 | 64213 | 2480  | 61733 |
| 411.2  | Myocardial     | 1.300046 | 1.438293 | 1.368426 | 3.65E-34 | 68239 | 865   | 67374 |
| 317    | Alcohol-rel    | 1.267742 | 1.389258 | 1.328138 | 4.63E-34 | 65987 | 1430  | 64557 |
| 425    | Cardiomyop     | 1.305692 | 1.447486 | 1.37617  | 4.75E-34 | 72639 | 732   | 71907 |
| 427.2  | Atrial fibrill | 1.231507 | 1.335405 | 1.282763 | 1.73E-33 | 60951 | 2072  | 58879 |
| 401    | Hypertensic    | 1.11281  | 1.160434 | 1.136362 | 5.86E-33 | 70491 | 19684 | 50807 |
| 389    | Hearing los    | 0.727487 | 0.796231 | 0.761325 | 2.49E-32 | 71141 | 3581  | 67560 |
| 427.21 | Atrial fibrill | 1.228993 | 1.334372 | 1.280984 | 3.59E-32 | 60882 | 2003  | 58879 |
| 496.2  | Chronic brc    | 1.301243 | 1.44598  | 1.372922 | 3.72E-32 | 63879 | 746   | 63133 |
| 503    | Pulmonary      | 1.464466 | 1.709137 | 1.585949 | 5.79E-32 | 68404 | 176   | 68228 |
| 496.21 | Obstructive    | 1.328588 | 1.489578 | 1.408325 | 5.84E-32 | 63680 | 547   | 63133 |
| 425.1  | Primary/int    | 1.309138 | 1.459868 | 1.384184 | 9.77E-32 | 72523 | 616   | 71907 |
| 411    | Ischemic Hc    | 1.167125 | 1.242187 | 1.204261 | 1.38E-31 | 71543 | 4169  | 67374 |
| 272.11 | Hyperchole     | 0.781556 | 0.840095 | 0.810486 | 4.04E-30 | 60446 | 5534  | 54912 |
| 599.5  | Frequency c    | 0.735115 | 0.804569 | 0.76931  | 4.90E-30 | 62219 | 3480  | 58739 |
| 411.4  | Coronary at    | 1.18055  | 1.265461 | 1.222546 | 7.85E-30 | 70519 | 3145  | 67374 |
| 760    | Back pain      | 0.849367 | 0.89156  | 0.870301 | 2.85E-29 | 67861 | 12275 | 55586 |
| 585.31 | Renal dialys   | 1.535491 | 1.849168 | 1.692311 | 2.96E-29 | 68639 | 67    | 68572 |
| 627.3  | Postmenop      | 0.559817 | 0.665183 | 0.610762 | 3.80E-29 | 51976 | 1048  | 50928 |
| 513.3  | Hypoventila    | 1.418762 | 1.65038  | 1.53539  | 4.47E-29 | 72112 | 183   | 71929 |
| 401.1  | Essential hy   | 1.104558 | 1.152306 | 1.128173 | 5.63E-29 | 70040 | 19233 | 50807 |
| 626.13 | Irregular m    | 0.71447  | 0.79037  | 0.751741 | 1.59E-28 | 53998 | 3070  | 50928 |
| 706    | Diseases of    | 0.716486 | 0.792036 | 0.753591 | 1.94E-28 | 69106 | 3063  | 66043 |
| 585.32 | End stage r    | 1.479226 | 1.75872  | 1.619737 | 2.61E-28 | 68673 | 101   | 68572 |
| 38     | Septicemia     | 1.375177 | 1.583712 | 1.480061 | 6.73E-28 | 71325 | 243   | 71082 |
| 317.1  | Alcoholism     | 1.275439 | 1.419435 | 1.347248 | 7.22E-28 | 65504 | 947   | 64557 |

|                    |          |          |          |          |       |       |       |
|--------------------|----------|----------|----------|----------|-------|-------|-------|
| 613 Other nonn     | 0.709147 | 0.78722  | 0.747469 | 8.97E-28 | 70819 | 2669  | 68150 |
| 614.5 Inflammato   | 0.727878 | 0.802813 | 0.764701 | 7.26E-27 | 68529 | 3058  | 65471 |
| 585.3 Chronic ren  | 1.268369 | 1.412066 | 1.339887 | 9.32E-27 | 69319 | 747   | 68572 |
| 702.1 Actinic kera | 0.652619 | 0.744815 | 0.697615 | 1.26E-26 | 68886 | 1751  | 67135 |
| 327.32 Obstructive | 1.166295 | 1.250299 | 1.207998 | 1.64E-26 | 64566 | 2853  | 61713 |
| 428.4 Heart failur | 1.339222 | 1.529857 | 1.433775 | 1.84E-26 | 68924 | 399   | 68525 |
| 428.2 Heart failur | 1.357154 | 1.560755 | 1.458505 | 2.11E-26 | 68834 | 309   | 68525 |
| 394.7 Disease of t | 1.344243 | 1.540388 | 1.4421   | 3.73E-26 | 68943 | 307   | 68636 |
| 375.1 Dry eyes     | 0.712066 | 0.79195  | 0.751284 | 5.57E-26 | 67666 | 2524  | 65142 |
| 614 Inflammato     | 0.758497 | 0.827125 | 0.7923   | 5.92E-26 | 69353 | 3882  | 65471 |
| 610.1 Cystic mast  | 0.654356 | 0.748023 | 0.700052 | 1.51E-25 | 63405 | 1672  | 61733 |
| 272 Disorders o    | 0.862043 | 0.903428 | 0.882565 | 1.57E-25 | 70083 | 15171 | 54912 |
| 272.1 Hyperlipide  | 0.862467 | 0.904076 | 0.883099 | 4.50E-25 | 69879 | 14967 | 54912 |
| 394 Rheumatic      | 1.274924 | 1.430208 | 1.352176 | 6.13E-25 | 69233 | 597   | 68636 |
| 198.4 Secondary i  | 1.376637 | 1.604355 | 1.490649 | 7.76E-25 | 67813 | 195   | 67618 |
| 591 Urinary trac   | 0.841276 | 0.889262 | 0.86506  | 1.27E-24 | 65679 | 9024  | 56655 |
| 458.9 Hypotensio   | 1.298847 | 1.47351  | 1.38646  | 2.22E-24 | 71201 | 436   | 70765 |
| 704 Diseases of    | 0.664479 | 0.758082 | 0.710156 | 2.41E-24 | 69587 | 1746  | 67841 |
| 994.2 Sepsis       | 1.411244 | 1.671508 | 1.543152 | 3.37E-24 | 73089 | 119   | 72970 |
| 455 Hemorrhoid     | 0.699923 | 0.785538 | 0.741848 | 3.58E-24 | 67938 | 2215  | 65723 |
| 627.22 Need for Hc | 0.510619 | 0.634572 | 0.569944 | 3.73E-24 | 51625 | 697   | 50928 |
| 296.1 Bipolar      | 1.174637 | 1.269377 | 1.22167  | 4.30E-24 | 51275 | 2483  | 48792 |
| 994 Sepsis and i   | 1.385391 | 1.626081 | 1.507344 | 4.30E-24 | 73133 | 163   | 72970 |
| 797 Shock          | 1.415649 | 1.681604 | 1.550474 | 6.00E-24 | 73137 | 109   | 73028 |
| 452 Other veno     | 1.237731 | 1.376172 | 1.306825 | 3.73E-23 | 66586 | 863   | 65723 |
| 994.21 Septic choc | 1.527661 | 1.902374 | 1.717168 | 6.69E-23 | 73001 | 31    | 72970 |
| 496.1 Emphysem:    | 1.269957 | 1.432546 | 1.35096  | 9.51E-23 | 63677 | 544   | 63133 |
| 840 Sprains and    | 0.777752 | 0.84563  | 0.811224 | 1.11E-22 | 67565 | 3999  | 63566 |
| 704.1 Alopecia     | 0.625057 | 0.731088 | 0.67652  | 1.45E-22 | 69107 | 1266  | 67841 |
| 512.8 Cough        | 0.850734 | 0.898055 | 0.874184 | 2.10E-22 | 59433 | 10131 | 49302 |
| 571.81 Portal hype | 1.368576 | 1.612393 | 1.49125  | 6.14E-22 | 65369 | 179   | 65190 |
| 288.2 Elevated wl  | 1.232718 | 1.374302 | 1.303363 | 1.09E-21 | 66805 | 947   | 65858 |
| 743.11 Osteoporos  | 0.757088 | 0.832111 | 0.794029 | 1.10E-21 | 66936 | 3174  | 63762 |

|        |              |          |          |          |          |       |      |       |
|--------|--------------|----------|----------|----------|----------|-------|------|-------|
| 614.52 | Vaginitis an | 0.70449  | 0.793555 | 0.748082 | 1.22E-21 | 67511 | 2040 | 65471 |
| 747.11 | Cardiac shu  | 1.286088 | 1.467275 | 1.377389 | 1.23E-21 | 72402 | 465  | 71937 |
| 530.2  | Esophageal   | 1.36494  | 1.610302 | 1.488894 | 1.68E-21 | 58182 | 138  | 58044 |
| 348    | Other cond   | 1.224928 | 1.362108 | 1.293351 | 1.87E-21 | 64635 | 998  | 63637 |
| 381    | Otitis medi  | 0.758724 | 0.834462 | 0.795992 | 5.52E-21 | 67416 | 3130 | 64286 |
| 470    | Septal Devi  | 0.725754 | 0.810697 | 0.767422 | 6.99E-21 | 56157 | 2355 | 53802 |
| 628    | Ovarian cys  | 0.729748 | 0.813881 | 0.771019 | 9.56E-21 | 53418 | 2490 | 50928 |
| 366    | Cataract     | 0.80069  | 0.865052 | 0.832481 | 1.47E-20 | 71800 | 4615 | 67185 |
| 509.3  | Pulmonary    | 1.376652 | 1.642626 | 1.511246 | 2.38E-20 | 68393 | 165  | 68228 |
| 198.5  | Secondary i  | 1.357678 | 1.607524 | 1.483973 | 2.43E-20 | 67770 | 152  | 67618 |
| 709.3  | Systemic sc  | 1.352035 | 1.597575 | 1.476794 | 2.46E-20 | 63557 | 143  | 63414 |
| 366.2  | Senile catar | 0.78828  | 0.856738 | 0.822063 | 2.92E-20 | 71074 | 3889 | 67185 |
| 512.9  | Other dyspi  | 1.127333 | 1.203607 | 1.165128 | 5.46E-20 | 52928 | 3626 | 49302 |
| 389.1  | Sensorineu   | 0.72087  | 0.809301 | 0.764217 | 8.40E-20 | 69645 | 2085 | 67560 |
| 562.1  | Diverticulo  | 0.77894  | 0.850887 | 0.814413 | 8.40E-20 | 64044 | 3423 | 60621 |
| 694    | Dyschromia   | 0.596918 | 0.716386 | 0.654589 | 8.80E-20 | 65376 | 952  | 64424 |
| 280    | Iron deficie | 1.221465 | 1.365148 | 1.293323 | 1.08E-19 | 67538 | 869  | 66669 |
| 562    | Diverticulo  | 0.787967 | 0.857609 | 0.822328 | 1.39E-19 | 64334 | 3713 | 60621 |
| 198.2  | Secondary i  | 1.316054 | 1.537265 | 1.427397 | 1.66E-19 | 67847 | 229  | 67618 |
| 513    | Respiratory  | 1.233588 | 1.388941 | 1.311622 | 2.63E-19 | 72580 | 651  | 71929 |
| 625    | Pain and ot  | 0.786925 | 0.857881 | 0.821894 | 5.34E-19 | 67790 | 3901 | 63889 |
| 564    | Functional i | 0.739955 | 0.824964 | 0.781675 | 6.86E-19 | 63080 | 2459 | 60621 |
| 327.4  | Insomnia     | 0.769174 | 0.845898 | 0.806944 | 9.40E-19 | 64787 | 3074 | 61713 |
| 573.5  | Jaundice (n  | 1.387924 | 1.684855 | 1.539637 | 1.05E-18 | 65303 | 113  | 65190 |
| 694.2  | Other dyscl  | 0.594087 | 0.717541 | 0.653608 | 1.07E-18 | 65311 | 887  | 64424 |
| 276.1  | Electrolyte  | 1.126775 | 1.207451 | 1.166828 | 2.15E-18 | 67299 | 3215 | 64084 |
| 707    | Chronic ulc  | 1.269626 | 1.461751 | 1.366616 | 2.68E-18 | 72888 | 336  | 72552 |
| 707.1  | Decubitus u  | 1.354432 | 1.625571 | 1.493099 | 3.17E-18 | 72663 | 111  | 72552 |
| 687.1  | Rash and ot  | 0.782543 | 0.856681 | 0.819075 | 5.53E-18 | 63526 | 3275 | 60251 |
| 288    | Diseases of  | 1.166714 | 1.277947 | 1.222093 | 5.64E-18 | 67497 | 1639 | 65858 |
| 726.1  | Enthesopat   | 0.779407 | 0.854586 | 0.816452 | 6.06E-18 | 61984 | 3097 | 58887 |
| 687.4  | Disturbanc   | 0.79651  | 0.866577 | 0.831075 | 7.78E-18 | 64018 | 3767 | 60251 |
| 502    | Postinflamr  | 1.269128 | 1.46516  | 1.367447 | 1.04E-17 | 68618 | 390  | 68228 |

|                    |          |          |          |          |       |      |       |
|--------------------|----------|----------|----------|----------|-------|------|-------|
| 706.1 Acne         | 0.673974 | 0.780433 | 0.725761 | 1.07E-17 | 67619 | 1576 | 66043 |
| 155 Cancer of li   | 1.345374 | 1.614842 | 1.483247 | 1.14E-17 | 70891 | 114  | 70777 |
| 458 Hypotensio     | 1.19263  | 1.325832 | 1.259251 | 1.28E-17 | 71760 | 995  | 70765 |
| 426.92 Cardiac def | 1.30494  | 1.535011 | 1.42088  | 1.41E-17 | 59098 | 219  | 58879 |
| 523.1 Gingivitis   | 0.550257 | 0.687813 | 0.616027 | 1.76E-17 | 69031 | 703  | 68328 |
| 743.1 Osteoporos   | 0.802194 | 0.871341 | 0.836326 | 2.39E-17 | 67761 | 3999 | 63762 |
| 578 Gastrointes    | 0.759547 | 0.842189 | 0.800153 | 2.66E-17 | 66567 | 2660 | 63907 |
| 371.2 Conjunctivi  | 0.707164 | 0.805616 | 0.755299 | 3.23E-17 | 65176 | 1624 | 63552 |
| 611.11 Mammogra    | 0.622971 | 0.744333 | 0.681673 | 3.25E-17 | 62653 | 920  | 61733 |
| 504 Other alvec    | 1.32024  | 1.568826 | 1.445776 | 3.38E-17 | 68428 | 200  | 68228 |
| 287.3 Thrombocy    | 1.235169 | 1.408068 | 1.322196 | 5.34E-17 | 68904 | 535  | 68369 |
| 381.2 Eustachian   | 0.700102 | 0.801473 | 0.749592 | 6.63E-17 | 65878 | 1592 | 64286 |
| 172 Skin cancer    | 0.750887 | 0.837142 | 0.793258 | 6.96E-17 | 68133 | 2339 | 65794 |
| 564.1 Irritable Bo | 0.728816 | 0.822    | 0.77445  | 8.35E-17 | 62638 | 2017 | 60621 |
| 480 Pneumonia      | 1.141831 | 1.24005  | 1.190713 | 1.07E-16 | 64821 | 1942 | 62879 |
| 276.42 Alkalosis   | 1.419137 | 1.784992 | 1.6079   | 1.11E-16 | 64131 | 47   | 64084 |
| 386 Vertiginous    | 0.673914 | 0.783566 | 0.727271 | 1.24E-16 | 65229 | 1266 | 63963 |
| 348.7 Coma         | 1.385721 | 1.71065  | 1.551043 | 1.28E-16 | 63725 | 88   | 63637 |
| 371 Inflammatic    | 0.780762 | 0.858281 | 0.818943 | 1.34E-16 | 66454 | 2902 | 63552 |
| 379.2 Disorders o  | 0.713744 | 0.812885 | 0.762234 | 2.82E-16 | 66747 | 1605 | 65142 |
| 198 Secondary i    | 1.174563 | 1.301401 | 1.237775 | 3.26E-16 | 68715 | 1097 | 67618 |
| 523 Gingival an    | 0.605163 | 0.734779 | 0.667585 | 3.34E-16 | 69195 | 867  | 68328 |
| 939 Atopic/conf    | 0.779376 | 0.858492 | 0.818321 | 4.37E-16 | 65142 | 2848 | 62294 |
| 382 Otagia         | 0.651181 | 0.769011 | 0.708314 | 4.43E-16 | 65376 | 1090 | 64286 |
| 797.1 Cardiogenic  | 1.425027 | 1.814372 | 1.627399 | 5.53E-16 | 73061 | 33   | 73028 |
| 727 Other disor    | 0.805573 | 0.876534 | 0.840597 | 7.53E-16 | 62457 | 3570 | 58887 |
| 155.1 Malignant r  | 1.340256 | 1.632423 | 1.490811 | 8.65E-16 | 70868 | 91   | 70777 |
| 569 Other disor    | 1.121385 | 1.208548 | 1.164747 | 1.36E-15 | 70304 | 2743 | 67561 |
| 593 Hematuria      | 0.791307 | 0.868093 | 0.82914  | 2.20E-15 | 59741 | 3086 | 56655 |
| 172.2 Other non-r  | 0.735278 | 0.830467 | 0.781927 | 2.39E-15 | 67661 | 1867 | 65794 |
| 472 Chronic pha    | 0.730179 | 0.827319 | 0.777734 | 3.08E-15 | 55541 | 1739 | 53802 |
| 380.4 Impacted c   | 0.699571 | 0.806391 | 0.75167  | 3.47E-15 | 70611 | 1371 | 69240 |
| 568.1 Peritoneal a | 1.239593 | 1.433909 | 1.338027 | 3.59E-15 | 67919 | 358  | 67561 |



|                      |          |          |          |          |       |       |       |
|----------------------|----------|----------|----------|----------|-------|-------|-------|
| 418 Nonspecific      | 0.896458 | 0.936474 | 0.916323 | 4.36E-15 | 69334 | 14999 | 54335 |
| 747.1 Cardiac con    | 1.197661 | 1.353018 | 1.27571  | 4.61E-15 | 72694 | 757   | 71937 |
| 627.1 Postmenop      | 0.651662 | 0.773198 | 0.710586 | 4.89E-15 | 51852 | 924   | 50928 |
| 613.5 Mastodyn       | 0.648824 | 0.772167 | 0.708543 | 8.61E-15 | 69131 | 981   | 68150 |
| 475 Chronic sin      | 0.794961 | 0.872133 | 0.832989 | 1.07E-14 | 56845 | 3043  | 53802 |
| 327 Sleep disor      | 0.840142 | 0.901379 | 0.870439 | 1.07E-14 | 67087 | 5374  | 61713 |
| 70.4 Chronic hep     | 1.237062 | 1.434339 | 1.337028 | 1.12E-14 | 63467 | 345   | 63122 |
| 165 Cancer with      | 1.219353 | 1.400174 | 1.310432 | 1.51E-14 | 73093 | 418   | 72675 |
| 578.8 Hemorrhag      | 0.663055 | 0.783394 | 0.721402 | 1.67E-14 | 65006 | 1099  | 63907 |
| 495.1 Chronic obs    | 1.237362 | 1.437168 | 1.338277 | 1.86E-14 | 63483 | 350   | 63133 |
| 285 Other anem       | 1.133148 | 1.235662 | 1.184161 | 1.95E-14 | 68591 | 1922  | 66669 |
| 510 Other disea      | 1.126945 | 1.224728 | 1.175608 | 2.44E-14 | 72592 | 1994  | 70598 |
| 317.11 Alcoholic liv | 1.343596 | 1.669099 | 1.512659 | 2.75E-14 | 64633 | 76    | 64557 |
| 165.1 Cancer of b    | 1.217957 | 1.400338 | 1.309863 | 2.85E-14 | 73085 | 410   | 72675 |
| 550 Abdominal        | 1.114483 | 1.202198 | 1.158111 | 3.01E-14 | 72317 | 2591  | 69726 |
| 286 Coagulator       | 1.147928 | 1.26468  | 1.206151 | 3.21E-14 | 69911 | 1542  | 68369 |
| 427.42 Cardiac arr   | 1.32878  | 1.637917 | 1.48771  | 4.13E-14 | 58969 | 90    | 58879 |
| 626.11 Absent or ir  | 0.725792 | 0.82813  | 0.775782 | 4.58E-14 | 52666 | 1738  | 50928 |
| 292.4 Altered me     | 1.154366 | 1.278411 | 1.216361 | 5.13E-14 | 68081 | 1153  | 66928 |
| 426.9 Cardiac pac    | 1.185626 | 1.338666 | 1.261843 | 5.43E-14 | 59596 | 717   | 58879 |
| 741 Symptoms         | 0.834663 | 0.899455 | 0.866697 | 6.35E-14 | 69768 | 4557  | 65211 |
| 379 Other disor      | 0.764792 | 0.854552 | 0.808884 | 6.86E-14 | 67249 | 2107  | 65142 |
| 389.4 Tinnitus       | 0.645311 | 0.77359  | 0.707348 | 7.20E-14 | 68454 | 894   | 67560 |
| 260 Protein-calc     | 1.19258  | 1.354367 | 1.273779 | 8.03E-14 | 62613 | 617   | 61996 |
| 78 Viral warts       | 0.691036 | 0.805489 | 0.746693 | 8.06E-14 | 64439 | 1317  | 63122 |
| 289 Other disea      | 1.219713 | 1.409469 | 1.315455 | 8.99E-14 | 66287 | 429   | 65858 |
| 513.4 Hyperventil    | 1.290547 | 1.563244 | 1.431076 | 1.42E-13 | 72081 | 152   | 71929 |
| 280.1 Iron deficie   | 1.185145 | 1.343579 | 1.264615 | 2.07E-13 | 67399 | 730   | 66669 |
| 427.12 Paroxysmal    | 1.213461 | 1.401037 | 1.307788 | 2.12E-13 | 59299 | 420   | 58879 |
| 180.3 Cervical int   | 0.718699 | 0.825809 | 0.770939 | 2.15E-13 | 62999 | 1578  | 61421 |
| 701 Other hype       | 0.776761 | 0.863866 | 0.819571 | 2.18E-13 | 70404 | 2343  | 68061 |
| 735 Acquired fo      | 0.760132 | 0.853816 | 0.806096 | 3.63E-13 | 69096 | 1933  | 67163 |
| 415.1 Acute pulm     | 1.23433  | 1.448503 | 1.342917 | 4.02E-13 | 70864 | 324   | 70540 |

|                     |          |          |          |          |       |      |       |
|---------------------|----------|----------|----------|----------|-------|------|-------|
| 572 Ascites (noi    | 1.213504 | 1.405077 | 1.310145 | 4.52E-13 | 65669 | 479  | 65190 |
| 297 Suicidal ide    | 1.142338 | 1.262614 | 1.202183 | 5.42E-13 | 50360 | 1568 | 48792 |
| 627.21 Symptomat    | 0.567775 | 0.723241 | 0.641955 | 7.17E-13 | 51444 | 516  | 50928 |
| 473.4 Voice distu   | 0.709994 | 0.822141 | 0.764683 | 7.54E-13 | 55049 | 1247 | 53802 |
| 427.4 Cardiac arr   | 1.286899 | 1.570214 | 1.43232  | 8.09E-13 | 59005 | 126  | 58879 |
| 286.4 Acquired cc   | 1.398101 | 1.84555  | 1.633101 | 9.18E-13 | 68396 | 27   | 68369 |
| 568 Other disor     | 1.201793 | 1.385486 | 1.294675 | 9.69E-13 | 68008 | 447  | 67561 |
| 599.9 Other abno    | 0.74184  | 0.843613 | 0.791661 | 1.07E-12 | 60347 | 1608 | 58739 |
| 841 Sprains and     | 0.76473  | 0.858747 | 0.81084  | 1.36E-12 | 65577 | 2011 | 63566 |
| 276.13 Hyperpotas   | 1.188953 | 1.361121 | 1.275439 | 1.58E-12 | 64620 | 536  | 64084 |
| 741.2 Stiffness of  | 0.706587 | 0.821978 | 0.762795 | 2.31E-12 | 66426 | 1215 | 65211 |
| 348.2 Cerebral ed   | 1.197791 | 1.381217 | 1.289836 | 2.34E-12 | 64192 | 555  | 63637 |
| 495 Asthma          | 1.083245 | 1.152907 | 1.117835 | 2.43E-12 | 67995 | 4862 | 63133 |
| 429.1 Heart trans   | 1.325477 | 1.674062 | 1.506823 | 2.63E-12 | 68620 | 95   | 68525 |
| 300.1 Anxiety disc  | 0.874303 | 0.927213 | 0.900526 | 2.75E-12 | 56892 | 8100 | 48792 |
| 394.1 Mitral valve  | 1.276195 | 1.555509 | 1.418318 | 2.91E-12 | 68759 | 123  | 68636 |
| 174 Breast canc     | 0.796265 | 0.87999  | 0.83749  | 3.60E-12 | 66961 | 2580 | 64381 |
| 979 Adverse dru     | 1.153542 | 1.292522 | 1.223123 | 3.79E-12 | 69584 | 987  | 68597 |
| 501 Pneumoniti      | 1.307999 | 1.63478  | 1.476758 | 3.88E-12 | 68330 | 102  | 68228 |
| 371.21 Allergic con | 0.724079 | 0.834741 | 0.778114 | 4.75E-12 | 64863 | 1311 | 63552 |
| 260.1 Cachexia      | 1.335577 | 1.711802 | 1.532362 | 5.59E-12 | 62043 | 47   | 61996 |
| 479 Other uppe      | 0.788867 | 0.87616  | 0.831795 | 6.09E-12 | 56182 | 2380 | 53802 |
| 446 Polyarteriti    | 1.23219  | 1.464237 | 1.350843 | 6.27E-12 | 69645 | 227  | 69418 |
| 579.2 Splenomeg     | 1.251458 | 1.51085  | 1.384815 | 8.71E-12 | 64095 | 188  | 63907 |
| 287 Purpura an      | 1.168341 | 1.327312 | 1.248183 | 9.10E-12 | 69081 | 712  | 68369 |
| 415.11 Pulmonary    | 1.224226 | 1.449812 | 1.33895  | 1.08E-11 | 70834 | 294  | 70540 |
| 425.2 Secondary/    | 1.224807 | 1.45387  | 1.3414   | 1.50E-11 | 72143 | 236  | 71907 |
| 504.1 Idiopathic f  | 1.285706 | 1.595713 | 1.444377 | 1.61E-11 | 68344 | 116  | 68228 |
| 374 Other disor     | 0.760511 | 0.860168 | 0.809385 | 1.69E-11 | 65248 | 1696 | 63552 |
| 300.9 Posttrauma    | 1.132487 | 1.256199 | 1.194097 | 1.94E-11 | 50234 | 1442 | 48792 |
| 401.22 Hypertensio  | 1.200495 | 1.400926 | 1.299885 | 2.46E-11 | 51156 | 349  | 50807 |
| 613.8 Other speci   | 0.653299 | 0.792359 | 0.720426 | 2.75E-11 | 68930 | 780  | 68150 |
| 550.6 Incisional h  | 1.207023 | 1.420488 | 1.31558  | 3.42E-11 | 70031 | 305  | 69726 |

|                      |          |          |          |          |       |      |       |
|----------------------|----------|----------|----------|----------|-------|------|-------|
| 473 Diseases of      | 0.753491 | 0.857171 | 0.804262 | 3.54E-11 | 55346 | 1544 | 53802 |
| 174.1 Breast canc    | 0.799656 | 0.885625 | 0.841978 | 4.07E-11 | 66832 | 2451 | 64381 |
| 295.1 Schizophre     | 1.173127 | 1.347867 | 1.260918 | 5.60E-11 | 49340 | 548  | 48792 |
| 938.2 Chronic der    | 0.544466 | 0.719934 | 0.627535 | 6.37E-11 | 62696 | 402  | 62294 |
| 626.12 Excessive o   | 0.796066 | 0.884596 | 0.83959  | 8.12E-11 | 53299 | 2371 | 50928 |
| 70.3 Viral hepati    | 1.147328 | 1.29464  | 1.221048 | 8.91E-11 | 63953 | 831  | 63122 |
| 174.11 Malignant r   | 0.800396 | 0.887362 | 0.843204 | 9.17E-11 | 66776 | 2395 | 64381 |
| 172.21 Basal cell c  | 0.543812 | 0.72085  | 0.627545 | 9.33E-11 | 66196 | 402  | 65794 |
| 295 Schizophre       | 1.12766  | 1.25317  | 1.190306 | 9.50E-11 | 49956 | 1164 | 48792 |
| 261.4 Vitamin D c    | 0.869334 | 0.927709 | 0.898241 | 9.64E-11 | 67991 | 5995 | 61996 |
| 276.14 Hypopotas     | 1.103951 | 1.203871 | 1.153649 | 9.92E-11 | 66105 | 2021 | 64084 |
| 276 Disorders o      | 1.065496 | 1.127016 | 1.09605  | 1.50E-10 | 70218 | 6134 | 64084 |
| 695.3 Rosacea        | 0.649592 | 0.795773 | 0.720029 | 2.29E-10 | 65153 | 729  | 64424 |
| 747.13 Congenital    | 1.265488 | 1.581491 | 1.429355 | 2.29E-10 | 72080 | 143  | 71937 |
| 747 Cardiac anc      | 1.139213 | 1.282462 | 1.210965 | 2.33E-10 | 72903 | 966  | 71937 |
| 938 Dermatitis       | 0.573519 | 0.745108 | 0.655119 | 2.44E-10 | 62741 | 447  | 62294 |
| 513.32 Orthopnea     | 1.284365 | 1.6383   | 1.470727 | 2.61E-10 | 71996 | 67   | 71929 |
| 386.2 Peripheral     | 0.677616 | 0.814887 | 0.744044 | 3.37E-10 | 64779 | 816  | 63963 |
| 610.3 Fibrosclero    | 0.459031 | 0.664198 | 0.554049 | 3.82E-10 | 61984 | 251  | 61733 |
| 835 Internal der     | 0.763248 | 0.868047 | 0.814553 | 4.14E-10 | 70558 | 1645 | 68913 |
| 180 Cervical car     | 0.765466 | 0.870209 | 0.816709 | 6.12E-10 | 63162 | 1741 | 61421 |
| 217.1 Nevus, non     | 0.460065 | 0.667388 | 0.556026 | 6.37E-10 | 66139 | 253  | 65886 |
| 70 Viral hepati      | 1.129768 | 1.267425 | 1.198525 | 6.58E-10 | 64112 | 990  | 63122 |
| 365 Glaucoma         | 0.787808 | 0.883519 | 0.834824 | 6.80E-10 | 70299 | 1864 | 68435 |
| 610.4 Benign neo     | 0.661983 | 0.807115 | 0.732005 | 6.96E-10 | 62448 | 715  | 61733 |
| 625.1 Dyspareuni     | 0.607393 | 0.772104 | 0.686051 | 7.60E-10 | 64461 | 572  | 63889 |
| 274.1 Gout           | 1.158053 | 1.332341 | 1.245533 | 7.84E-10 | 72754 | 491  | 72263 |
| 297.1 Suicidal ide   | 1.124574 | 1.257017 | 1.190567 | 8.05E-10 | 50055 | 1263 | 48792 |
| 622 Polyp of fer     | 0.689501 | 0.825658 | 0.755431 | 1.07E-09 | 72046 | 882  | 71164 |
| 427.22 Atrial flutte | 1.169614 | 1.362577 | 1.26643  | 1.23E-09 | 59305 | 426  | 58879 |
| 701.2 Scar conditi   | 0.681654 | 0.821604 | 0.749356 | 1.40E-09 | 68873 | 812  | 68061 |
| 280.2 Iron deficie   | 1.237736 | 1.536444 | 1.391494 | 1.58E-09 | 66816 | 147  | 66669 |
| 365.1 Open-angle     | 0.756973 | 0.86807  | 0.811318 | 2.18E-09 | 69761 | 1326 | 68435 |

|        |              |          |          |          |          |       |      |       |
|--------|--------------|----------|----------|----------|----------|-------|------|-------|
| 198.3  | Secondary i  | 1.253557 | 1.587895 | 1.427717 | 2.18E-09 | 67702 | 84   | 67618 |
| 374.6  | Dermatoch    | 0.739762 | 0.858102 | 0.797554 | 2.33E-09 | 64715 | 1163 | 63552 |
| 613.7  | Other signs  | 0.641951 | 0.798544 | 0.717171 | 2.41E-09 | 68756 | 606  | 68150 |
| 512.7  | Shortness c  | 1.054229 | 1.110437 | 1.082105 | 2.59E-09 | 56852 | 7550 | 49302 |
| 290.2  | Delirium du  | 1.209108 | 1.471927 | 1.344199 | 2.88E-09 | 67089 | 161  | 66928 |
| 521    | Diseases of  | 0.719438 | 0.846808 | 0.78134  | 3.00E-09 | 69381 | 1053 | 68328 |
| 370.31 | Keratoconji  | 0.636699 | 0.796164 | 0.713278 | 3.17E-09 | 64105 | 553  | 63552 |
| 854    | Complicatic  | 1.203793 | 1.4596   | 1.335485 | 3.24E-09 | 71060 | 196  | 70864 |
| 969    | Poisoning b  | 1.184607 | 1.410593 | 1.29905  | 4.00E-09 | 68961 | 364  | 68597 |
| 195    | Cancer, sus  | 1.155842 | 1.340738 | 1.248969 | 4.04E-09 | 68091 | 473  | 67618 |
| 550.5  | Ventral her  | 1.185129 | 1.414391 | 1.302054 | 4.38E-09 | 69995 | 269  | 69726 |
| 369    | Infection of | 0.720924 | 0.849692 | 0.783544 | 6.03E-09 | 64549 | 997  | 63552 |
| 217    | Vascular ha  | 0.510454 | 0.715248 | 0.606133 | 6.09E-09 | 66178 | 292  | 65886 |
| 696.42 | Psoriatic ar | 1.148794 | 1.328297 | 1.239533 | 6.29E-09 | 62130 | 497  | 61633 |
| 440    | Atheroscler  | 1.116696 | 1.251714 | 1.184005 | 6.43E-09 | 70361 | 943  | 69418 |
| 627.5  | Premature    | 0.52326  | 0.725248 | 0.617921 | 7.60E-09 | 51210 | 282  | 50928 |
| 395    | Heart valve  | 1.084277 | 1.179872 | 1.131786 | 9.19E-09 | 70806 | 2170 | 68636 |
| 520    | Disorders o  | 0.570903 | 0.758677 | 0.659601 | 9.82E-09 | 68788 | 460  | 68328 |
| 411.8  | Other chroi  | 1.128268 | 1.282079 | 1.205127 | 1.01E-08 | 68097 | 723  | 67374 |
| 340    | Migraine     | 0.858551 | 0.927954 | 0.89285  | 1.10E-08 | 70686 | 4471 | 66215 |
| 550.2  | Diaphragm:   | 1.091863 | 1.197997 | 1.144728 | 1.11E-08 | 71416 | 1690 | 69726 |
| 772.2  | Spasm of m   | 0.741046 | 0.86343  | 0.800684 | 1.21E-08 | 69333 | 1168 | 68165 |
| 727.4  | Ganglion ar  | 0.65262  | 0.811404 | 0.72897  | 1.28E-08 | 59486 | 599  | 58887 |
| 735.3  | Hallux valgu | 0.6959   | 0.837338 | 0.764401 | 1.28E-08 | 67944 | 781  | 67163 |
| 426.91 | Cardiac pac  | 1.140338 | 1.315259 | 1.227665 | 1.68E-08 | 59422 | 543  | 58879 |
| 370.3  | Keratoconji  | 0.667094 | 0.821378 | 0.741478 | 1.78E-08 | 64175 | 623  | 63552 |
| 521.1  | Dental cari  | 0.72637  | 0.856454 | 0.789588 | 1.92E-08 | 69347 | 1019 | 68328 |
| 359.2  | Myopathy     | 1.192244 | 1.454994 | 1.327534 | 2.06E-08 | 70606 | 176  | 70430 |
| 256.4  | Polycystic c | 1.117743 | 1.262723 | 1.189907 | 2.29E-08 | 68134 | 1139 | 66995 |
| 348.8  | Encephalop   | 1.172577 | 1.401318 | 1.288204 | 2.37E-08 | 63952 | 315  | 63637 |
| 520.2  | Disturbanc   | 0.573713 | 0.765137 | 0.66408  | 2.54E-08 | 68776 | 448  | 68328 |
| 198.6  | Secondary i  | 1.184271 | 1.436407 | 1.313114 | 2.71E-08 | 67827 | 209  | 67618 |
| 747.12 | Valvular he  | 1.202549 | 1.488294 | 1.349431 | 3.12E-08 | 72143 | 206  | 71937 |

|        |               |          |          |          |          |       |      |       |
|--------|---------------|----------|----------|----------|----------|-------|------|-------|
| 727.1  | Synovitis ar  | 0.81277  | 0.905877 | 0.85859  | 3.60E-08 | 60918 | 2031 | 58887 |
| 395.6  | Heart valve   | 1.217785 | 1.540883 | 1.386341 | 3.71E-08 | 68736 | 100  | 68636 |
| 483    | Acute bron    | 0.840888 | 0.920981 | 0.880397 | 4.08E-08 | 65923 | 3044 | 62879 |
| 790.8  | Elevated C-   | 1.15445  | 1.362305 | 1.260029 | 4.15E-08 | 68538 | 349  | 68189 |
| 578.2  | Blood in stc  | 0.752041 | 0.873444 | 0.811242 | 4.32E-08 | 65145 | 1238 | 63907 |
| 286.5  | Hemorrhag     | 1.216352 | 1.537349 | 1.382111 | 4.47E-08 | 68470 | 101  | 68369 |
| 626.2  | Dysmenorri    | 0.730105 | 0.861419 | 0.793913 | 4.55E-08 | 51978 | 1050 | 50928 |
| 962.1  | Adrenal cor   | 1.229856 | 1.582185 | 1.41464  | 4.63E-08 | 68688 | 91   | 68597 |
| 359    | Muscular d    | 1.178178 | 1.42875  | 1.306781 | 4.72E-08 | 70640 | 210  | 70430 |
| 81     | Infection/ir  | 1.179618 | 1.437602 | 1.312269 | 6.34E-08 | 72623 | 204  | 72419 |
| 285.2  | Anemia of c   | 1.220333 | 1.558341 | 1.395921 | 6.44E-08 | 66769 | 100  | 66669 |
| 285.1  | Acute postf   | 1.159723 | 1.380714 | 1.271286 | 6.62E-08 | 67018 | 349  | 66669 |
| 367.8  | Hypermetr     | 0.554532 | 0.757948 | 0.650206 | 6.79E-08 | 68315 | 321  | 67994 |
| 250.6  | Polyneurop    | 1.128255 | 1.299318 | 1.214017 | 7.00E-08 | 62724 | 566  | 62158 |
| 191.11 | Cancer of b   | 1.1676   | 1.406008 | 1.289504 | 7.46E-08 | 72258 | 262  | 71996 |
| 555.1  | Regional er   | 1.123503 | 1.287811 | 1.205832 | 7.56E-08 | 61364 | 743  | 60621 |
| 395.3  | Nonrheuma     | 1.189173 | 1.46957  | 1.33311  | 8.71E-08 | 68794 | 158  | 68636 |
| 962    | Poisoning b   | 1.203874 | 1.514509 | 1.364795 | 8.97E-08 | 68738 | 141  | 68597 |
| 642    | Hypertensic   | 1.116795 | 1.271672 | 1.19372  | 9.10E-08 | 72860 | 1022 | 71838 |
| 282    | Hereditary    | 1.137415 | 1.323501 | 1.229368 | 9.30E-08 | 67374 | 705  | 66669 |
| 261    | Vitamin def   | 0.894678 | 0.949731 | 0.921968 | 9.66E-08 | 69000 | 7004 | 61996 |
| 742.9  | Other dera    | 0.660091 | 0.824459 | 0.739052 | 9.93E-08 | 65799 | 588  | 65211 |
| 586    | Other disor   | 1.085287 | 1.195307 | 1.140075 | 1.02E-07 | 70258 | 1686 | 68572 |
| 250.24 | Type 2 diab   | 1.113398 | 1.265142 | 1.189181 | 1.04E-07 | 62904 | 746  | 62158 |
| 204.2  | Myeloid leu   | 1.213036 | 1.549309 | 1.38856  | 1.05E-07 | 71848 | 108  | 71740 |
| 509.2  | Respiratory   | 1.196732 | 1.496825 | 1.351093 | 1.15E-07 | 68391 | 163  | 68228 |
| 614.51 | Cervicitis ar | 0.686467 | 0.840395 | 0.760683 | 1.17E-07 | 66181 | 710  | 65471 |
| 706.2  | Sebaceous     | 0.754454 | 0.877934 | 0.814699 | 1.17E-07 | 67185 | 1142 | 66043 |
| 618    | Genital pro   | 0.770107 | 0.886437 | 0.827002 | 1.22E-07 | 72704 | 1294 | 71410 |
| 615    | Endometric    | 0.718006 | 0.858576 | 0.786132 | 1.34E-07 | 66393 | 922  | 65471 |
| 710.1  | Osteomyeli    | 1.181441 | 1.462398 | 1.327193 | 1.62E-07 | 64920 | 153  | 64767 |
| 304    | Adjustment    | 0.814531 | 0.910692 | 0.86181  | 1.76E-07 | 50889 | 2097 | 48792 |
| 255.11 | Cushing's sy  | 1.194118 | 1.502002 | 1.354394 | 1.76E-07 | 67132 | 137  | 66995 |

|                    |          |          |          |          |       |       |       |
|--------------------|----------|----------|----------|----------|-------|-------|-------|
| 191.1 Cancer of b  | 1.156455 | 1.388527 | 1.274875 | 1.82E-07 | 72281 | 285   | 71996 |
| 370 Keratitis      | 0.745775 | 0.874873 | 0.808692 | 1.88E-07 | 64552 | 1000  | 63552 |
| 618.1 Prolapse of  | 0.74737  | 0.875902 | 0.810012 | 1.97E-07 | 72442 | 1032  | 71410 |
| 707.2 Chronic ulc  | 1.177774 | 1.453761 | 1.31961  | 2.13E-07 | 72719 | 167   | 72552 |
| 420 Carditis       | 1.152638 | 1.380099 | 1.26836  | 2.17E-07 | 72199 | 292   | 71907 |
| 444 Arterial em    | 1.179658 | 1.462267 | 1.325883 | 2.17E-07 | 69567 | 149   | 69418 |
| 112.3 Candidiasis  | 1.195331 | 1.515343 | 1.362859 | 2.33E-07 | 66464 | 101   | 66363 |
| 250.22 Type 2 diab | 1.14881  | 1.369834 | 1.26051  | 2.36E-07 | 62461 | 303   | 62158 |
| 218.1 Uterine leic | 0.819978 | 0.914339 | 0.866377 | 2.46E-07 | 67527 | 2041  | 65486 |
| 722 Interverteb    | 0.878727 | 0.943488 | 0.910791 | 2.60E-07 | 67393 | 4761  | 62632 |
| 204.22 Myeloid leu | 1.242623 | 1.694808 | 1.48584  | 2.62E-07 | 71782 | 42    | 71740 |
| 561 Symptoms       | 0.686239 | 0.843919 | 0.762287 | 2.72E-07 | 61280 | 659   | 60621 |
| 619 Noninflamr     | 0.855533 | 0.932291 | 0.893414 | 2.73E-07 | 70257 | 3565  | 66692 |
| 241 Nontoxic ne    | 0.845238 | 0.927203 | 0.885677 | 2.74E-07 | 61325 | 2859  | 58466 |
| 296 Mood disor     | 1.037451 | 1.08571  | 1.061401 | 2.77E-07 | 60111 | 11319 | 48792 |
| 790.1 Elevated se  | 1.130856 | 1.3245   | 1.228778 | 3.13E-07 | 68613 | 424   | 68189 |
| 41.4 E. coli       | 1.166303 | 1.427674 | 1.300641 | 3.16E-07 | 71288 | 206   | 71082 |
| 555 Inflammato     | 1.101181 | 1.245053 | 1.173041 | 3.48E-07 | 61621 | 1000  | 60621 |
| 276.11 Hyperosmo   | 1.21437  | 1.593728 | 1.41508  | 3.66E-07 | 64159 | 75    | 64084 |
| 371.3 Inflammato   | 0.747463 | 0.878901 | 0.81152  | 4.38E-07 | 64496 | 944   | 63552 |
| 871.2 Open woun    | 0.667634 | 0.836206 | 0.748544 | 4.66E-07 | 69285 | 596   | 68689 |
| 369.5 Conjunctivi  | 0.705563 | 0.857209 | 0.778904 | 4.94E-07 | 64267 | 715   | 63552 |
| 742 Derangeme      | 0.714064 | 0.862432 | 0.7859   | 5.73E-07 | 65994 | 783   | 65211 |
| 622.2 Mucous po    | 0.570617 | 0.781345 | 0.669737 | 5.85E-07 | 71483 | 319   | 71164 |
| 426 Cardiac con    | 1.071258 | 1.172069 | 1.121296 | 6.00E-07 | 60872 | 1993  | 58879 |
| 475.9 Postnasal d  | 0.70002  | 0.855386 | 0.775105 | 6.38E-07 | 54468 | 666   | 53802 |
| 289.4 Lymphader    | 0.810533 | 0.912547 | 0.860578 | 6.91E-07 | 67784 | 1926  | 65858 |
| 259 Other endo     | 0.707761 | 0.860426 | 0.781513 | 7.60E-07 | 67787 | 792   | 66995 |
| 478 Throat pain    | 0.650677 | 0.82941  | 0.736201 | 7.64E-07 | 54299 | 497   | 53802 |
| 297.2 Suicide or s | 1.132748 | 1.343671 | 1.238837 | 8.67E-07 | 49253 | 461   | 48792 |
| 218 Benign neo     | 0.831876 | 0.923797 | 0.877118 | 9.45E-07 | 67668 | 2182  | 65486 |
| 38.3 Bacteremia    | 1.194152 | 1.554263 | 1.384116 | 1.01E-06 | 71170 | 88    | 71082 |
| 292.3 Memory lo:   | 0.762349 | 0.889882 | 0.824572 | 1.03E-06 | 67993 | 1065  | 66928 |

|                      |          |          |          |          |       |      |       |
|----------------------|----------|----------|----------|----------|-------|------|-------|
| 721 Spondylosis      | 0.864834 | 0.939767 | 0.90188  | 1.11E-06 | 66038 | 3406 | 62632 |
| 931 Contact der      | 0.426576 | 0.69333  | 0.547003 | 1.15E-06 | 62443 | 149  | 62294 |
| 80 Postoperati       | 1.139407 | 1.3728   | 1.25844  | 1.27E-06 | 72710 | 291  | 72419 |
| 189.1 Cancer of k    | 1.1226   | 1.323655 | 1.22431  | 1.43E-06 | 72983 | 389  | 72594 |
| 282.8 Other hemo     | 1.257901 | 1.838487 | 1.570406 | 1.47E-06 | 66695 | 26   | 66669 |
| 626.8 Infertility, f | 0.64667  | 0.831279 | 0.734769 | 1.53E-06 | 51430 | 502  | 50928 |
| 301 Personality      | 1.121976 | 1.323534 | 1.22356  | 1.66E-06 | 49262 | 470  | 48792 |
| 560.1 Paralytic ile  | 1.1421   | 1.386711 | 1.266822 | 1.68E-06 | 60857 | 236  | 60621 |
| 301.2 Antisocial/t   | 1.145204 | 1.398802 | 1.274421 | 1.90E-06 | 49069 | 277  | 48792 |
| 291.8 Alteration c   | 1.095657 | 1.249709 | 1.172764 | 2.05E-06 | 67721 | 793  | 66928 |
| 557 Intestinal nr    | 1.12856  | 1.351444 | 1.241507 | 2.48E-06 | 60954 | 333  | 60621 |
| 565 Anal and re      | 0.792495 | 0.908203 | 0.849141 | 2.58E-06 | 68961 | 1400 | 67561 |
| 524 Dentofacial      | 0.634954 | 0.82883  | 0.727159 | 2.81E-06 | 68776 | 448  | 68328 |
| 626.4 Premenstru     | 0.42296  | 0.70059  | 0.547686 | 2.99E-06 | 51075 | 147  | 50928 |
| 592 Cystitis and     | 0.758181 | 0.892331 | 0.823508 | 3.01E-06 | 57639 | 984  | 56655 |
| 743.12 Senile osteo  | 0.783843 | 0.904761 | 0.843041 | 3.11E-06 | 64928 | 1166 | 63762 |
| 241.1 Nontoxic ur    | 0.795175 | 0.910265 | 0.851548 | 3.19E-06 | 59841 | 1375 | 58466 |
| 110 Dermatoph        | 0.809418 | 0.916982 | 0.862204 | 3.22E-06 | 67893 | 1530 | 66363 |
| 514 Abnormal f       | 1.081077 | 1.213611 | 1.147243 | 3.22E-06 | 72296 | 1041 | 71255 |
| 912 Insect bite      | 0.689856 | 0.858611 | 0.771068 | 3.26E-06 | 71142 | 580  | 70562 |
| 286.9 Abnormal c     | 1.17369  | 1.524469 | 1.357736 | 3.65E-06 | 68471 | 102  | 68369 |
| 197 Chemother        | 1.101406 | 1.275128 | 1.188537 | 3.76E-06 | 68223 | 605  | 67618 |
| 696.4 Psoriasis      | 1.081181 | 1.21639  | 1.148825 | 3.90E-06 | 62658 | 1025 | 61633 |
| 634.1 Missed abo     | 0.689736 | 0.860134 | 0.771592 | 4.19E-06 | 67989 | 656  | 67333 |
| 585.34 Chronic Kid   | 1.183099 | 1.57647  | 1.392347 | 4.21E-06 | 68633 | 61   | 68572 |
| 189 Cancer of u      | 1.102148 | 1.281379 | 1.192313 | 4.68E-06 | 73109 | 515  | 72594 |
| 703 Diseases of      | 0.617629 | 0.823869 | 0.715408 | 5.29E-06 | 68183 | 342  | 67841 |
| 782.3 Edema          | 1.04993  | 1.131137 | 1.090267 | 5.42E-06 | 70261 | 3077 | 67184 |
| 721.1 Spondylosis    | 0.865564 | 0.944011 | 0.904334 | 5.55E-06 | 65720 | 3088 | 62632 |
| 642.1 Preeclamps     | 1.122952 | 1.346843 | 1.23468  | 5.55E-06 | 72295 | 457  | 71838 |
| 195.1 Malignant r    | 1.12329  | 1.352178 | 1.239358 | 5.56E-06 | 67925 | 307  | 67618 |
| 331 Other cerek      | 1.102173 | 1.283746 | 1.19298  | 5.70E-06 | 64179 | 542  | 63637 |
| 454.1 Varicose ve    | 0.67775  | 0.855971 | 0.763255 | 5.81E-06 | 66231 | 508  | 65723 |

|                    |          |          |          |          |       |      |       |
|--------------------|----------|----------|----------|----------|-------|------|-------|
| 801 Fracture of    | 0.814785 | 0.921677 | 0.867246 | 5.95E-06 | 68201 | 1674 | 66527 |
| 526 Diseases of    | 0.744601 | 0.889079 | 0.814732 | 5.99E-06 | 69206 | 878  | 68328 |
| 528 Diseases of    | 0.73204  | 0.883901 | 0.805609 | 7.04E-06 | 71412 | 770  | 70642 |
| 295.3 Psychosis    | 1.093729 | 1.262129 | 1.178155 | 7.18E-06 | 49416 | 624  | 48792 |
| 597 Other disor    | 0.691033 | 0.864478 | 0.774472 | 7.81E-06 | 70256 | 552  | 69704 |
| 636.3 Hemorrhag    | 0.793545 | 0.913358 | 0.852063 | 8.13E-06 | 68853 | 1520 | 67333 |
| 710.19 Unspecifie  | 1.163193 | 1.522018 | 1.352916 | 8.18E-06 | 64851 | 84   | 64767 |
| 592.1 Cystitis     | 0.758114 | 0.897426 | 0.825898 | 8.89E-06 | 57567 | 912  | 56655 |
| 495.11 Chronic obs | 1.171155 | 1.554708 | 1.373291 | 9.18E-06 | 63216 | 83   | 63133 |
| 352.1 Trigeminal   | 0.677071 | 0.858755 | 0.764233 | 9.40E-06 | 67083 | 489  | 66594 |
| 587 Kidney repl    | 1.170709 | 1.554882 | 1.373462 | 9.59E-06 | 68658 | 86   | 68572 |
| 916 Contusion      | 0.859768 | 0.943129 | 0.900894 | 9.87E-06 | 71034 | 2914 | 68120 |
| 246 Other disor    | 0.762935 | 0.900323 | 0.829836 | 1.02E-05 | 59404 | 938  | 58466 |
| 340.1 Migrain wit  | 0.743777 | 0.891571 | 0.815465 | 1.03E-05 | 67086 | 871  | 66215 |
| 830 Dislocation    | 0.82239  | 0.927221 | 0.873892 | 1.07E-05 | 70633 | 1720 | 68913 |
| 283 Acquired he    | 1.214568 | 1.806085 | 1.536366 | 1.11E-05 | 66697 | 28   | 66669 |
| 110.1 Dermatoph    | 0.80888  | 0.921567 | 0.864141 | 1.15E-05 | 67749 | 1386 | 66363 |
| 440.1 Atheroscler  | 1.137222 | 1.425992 | 1.28609  | 1.18E-05 | 69568 | 150  | 69418 |
| 871 Open woun      | 0.812626 | 0.923446 | 0.866963 | 1.21E-05 | 70293 | 1604 | 68689 |
| 728.7 Fasciitis    | 0.765459 | 0.90272  | 0.832371 | 1.31E-05 | 59795 | 908  | 58887 |
| 593.2 Microscopi   | 0.724604 | 0.883974 | 0.801713 | 1.33E-05 | 57304 | 649  | 56655 |
| 788 Syncope an     | 0.87009  | 0.948696 | 0.908917 | 1.51E-05 | 71828 | 3343 | 68485 |
| 189.11 Malignant r | 1.107597 | 1.32339  | 1.216942 | 1.51E-05 | 72933 | 339  | 72594 |
| 41 Bacterial in    | 1.07356  | 1.210865 | 1.141988 | 1.54E-05 | 72161 | 1079 | 71082 |
| 255 Disorders o    | 1.083878 | 1.245796 | 1.165037 | 1.71E-05 | 67705 | 710  | 66995 |
| 575 Other biliar   | 1.082875 | 1.243509 | 1.163233 | 1.84E-05 | 71132 | 755  | 70377 |
| 198.1 Secondary i  | 1.091187 | 1.27222  | 1.182059 | 1.93E-05 | 68160 | 542  | 67618 |
| 446.5 Giant cell a | 1.163429 | 1.56688  | 1.375207 | 1.96E-05 | 69474 | 56   | 69418 |
| 285.22 Anemia in r | 1.180207 | 1.666271 | 1.441956 | 1.97E-05 | 66709 | 40   | 66669 |
| 454.11 Varicose ve | 0.645565 | 0.849376 | 0.742512 | 2.14E-05 | 66100 | 377  | 65723 |
| 440.2 Atheroscler  | 1.10596  | 1.326509 | 1.217518 | 2.15E-05 | 69725 | 307  | 69418 |
| 791 Gangrene       | 1.179495 | 1.696203 | 1.462904 | 2.20E-05 | 73172 | 30   | 73142 |
| 972.6 Antihyperte  | 1.196592 | 1.806197 | 1.532289 | 2.23E-05 | 68618 | 21   | 68597 |



|                     |          |          |          |          |       |       |       |
|---------------------|----------|----------|----------|----------|-------|-------|-------|
| 619.3 Noninflamr    | 0.638781 | 0.847163 | 0.737687 | 2.44E-05 | 67072 | 380   | 66692 |
| 228 Hemangion       | 0.681162 | 0.867786 | 0.770603 | 2.50E-05 | 72366 | 483   | 71883 |
| 701.4 Keloid scar   | 0.573572 | 0.814564 | 0.686251 | 2.62E-05 | 68301 | 240   | 68061 |
| 191 Malignant a     | 1.099893 | 1.309838 | 1.206005 | 2.63E-05 | 72394 | 398   | 71996 |
| 414 Other form      | 1.074498 | 1.222559 | 1.148402 | 2.64E-05 | 68208 | 834   | 67374 |
| 525.1 Loss of teet  | 0.487832 | 0.767817 | 0.615478 | 2.79E-05 | 68487 | 159   | 68328 |
| 292.6 Hallucinatic  | 1.127544 | 1.415939 | 1.275049 | 2.83E-05 | 67127 | 199   | 66928 |
| 420.3 Endocarditi   | 1.169699 | 1.659834 | 1.437546 | 2.83E-05 | 71944 | 37    | 71907 |
| 766 Neuralgia, r    | 0.787786 | 0.916513 | 0.850702 | 2.84E-05 | 67878 | 1054  | 66824 |
| 524.3 Anomalies r   | 0.647206 | 0.85288  | 0.744906 | 2.91E-05 | 68741 | 413   | 68328 |
| 411.1 Unstable ar   | 1.07463  | 1.227272 | 1.150883 | 3.34E-05 | 68162 | 788   | 67374 |
| 245 Thyroiditis     | 0.790551 | 0.918751 | 0.853178 | 3.48E-05 | 59644 | 1178  | 58466 |
| 972 Poisoning b     | 1.145318 | 1.507788 | 1.33464  | 3.48E-05 | 68699 | 102   | 68597 |
| 241.2 Nontoxic m    | 0.840799 | 0.939543 | 0.889401 | 3.53E-05 | 60387 | 1921  | 58466 |
| 300 Anxiety, ph     | 0.923489 | 0.971963 | 0.947545 | 3.65E-05 | 59201 | 10409 | 48792 |
| 763 Thoracic or     | 0.812485 | 0.928582 | 0.869427 | 4.05E-05 | 68164 | 1340  | 66824 |
| 110.11 Dermatoph    | 0.7925   | 0.920503 | 0.855086 | 4.19E-05 | 67414 | 1051  | 66363 |
| 592.13 Chronic inte | 0.652454 | 0.858619 | 0.750586 | 4.28E-05 | 57041 | 386   | 56655 |
| 367.2 Astigmatism   | 0.732249 | 0.894973 | 0.810939 | 4.29E-05 | 68667 | 673   | 67994 |
| 175 Acquired ak     | 0.671752 | 0.867787 | 0.765506 | 4.37E-05 | 60816 | 412   | 60404 |
| 282.9 Other here    | 1.09165  | 1.288855 | 1.188771 | 4.52E-05 | 67311 | 642   | 66669 |
| 446.9 Arteritis NC  | 1.131318 | 1.464511 | 1.305303 | 4.73E-05 | 69540 | 122   | 69418 |
| 735.23 Hallux rigid | 0.534711 | 0.801028 | 0.657793 | 4.96E-05 | 67351 | 188   | 67163 |
| 244.4 Hypothyroi    | 0.919431 | 0.971164 | 0.945096 | 5.26E-05 | 66924 | 8458  | 58466 |
| 345.3 Convulsion:   | 1.048404 | 1.147373 | 1.097526 | 5.26E-05 | 66007 | 2370  | 63637 |
| 765 Cervical rac    | 0.780865 | 0.917052 | 0.847313 | 5.40E-05 | 67787 | 963   | 66824 |
| 722.6 Degenerati    | 0.883613 | 0.957812 | 0.920321 | 5.43E-05 | 66153 | 3521  | 62632 |
| 696 Psoriasis an    | 1.062508 | 1.195279 | 1.128844 | 5.47E-05 | 62719 | 1086  | 61633 |
| 260.3 Adult failur  | 1.132804 | 1.479806 | 1.31241  | 5.96E-05 | 62094 | 98    | 61996 |
| 274.11 Gouty arthr  | 1.110737 | 1.379541 | 1.247721 | 6.05E-05 | 72452 | 189   | 72263 |
| 244 Hypothyroi      | 0.923498 | 0.973074 | 0.948099 | 6.46E-05 | 67823 | 9357  | 58466 |
| 531 Peptic ulcer    | 1.073944 | 1.241107 | 1.157687 | 7.30E-05 | 72197 | 652   | 71545 |
| 427.7 Tachycardia   | 1.045888 | 1.143526 | 1.094401 | 7.44E-05 | 61196 | 2317  | 58879 |

|                     |          |          |          |          |       |      |       |
|---------------------|----------|----------|----------|----------|-------|------|-------|
| 380.1 Otitis exter  | 0.70438  | 0.887625 | 0.792448 | 8.13E-05 | 69751 | 511  | 69240 |
| 296.22 Major depr   | 1.037752 | 1.117754 | 1.077486 | 8.17E-05 | 52338 | 3546 | 48792 |
| 840.2 Rotator cuff  | 0.725765 | 0.896934 | 0.808483 | 8.42E-05 | 64126 | 560  | 63566 |
| 573 Other disor     | 1.064209 | 1.208639 | 1.136202 | 8.43E-05 | 66158 | 968  | 65190 |
| 275.3 Disorders o   | 1.118638 | 1.440114 | 1.285826 | 8.89E-05 | 71045 | 127  | 70918 |
| 681.5 Cellulitis an | 1.079247 | 1.265396 | 1.172498 | 8.94E-05 | 66337 | 529  | 65808 |
| 348.9 Other cond    | 1.060419 | 1.196307 | 1.128013 | 9.02E-05 | 64718 | 1081 | 63637 |
| 573.3 Hepatomeg     | 1.129357 | 1.487449 | 1.315059 | 9.20E-05 | 65313 | 123  | 65190 |
| 735.2 Acquired tc   | 0.75363  | 0.909248 | 0.829229 | 9.33E-05 | 67852 | 689  | 67163 |
| 709.4 Polymyositi   | 1.131542 | 1.521195 | 1.337856 | 9.65E-05 | 63483 | 69   | 63414 |
| 420.2 Pericarditis  | 1.100797 | 1.357855 | 1.231598 | 9.95E-05 | 72147 | 240  | 71907 |
| 433 Cerebrovas      | 1.035106 | 1.111549 | 1.073044 | 0.000105 | 71937 | 3550 | 68387 |
| 426.2 Atrioventric  | 1.088169 | 1.307152 | 1.198313 | 0.000108 | 59214 | 335  | 58879 |
| 580.4 Renal sclerc  | 1.132474 | 1.537132 | 1.347563 | 0.000109 | 68645 | 73   | 68572 |
| 531.5 Gastrojejun   | 1.146555 | 1.658193 | 1.425801 | 0.000109 | 71582 | 37   | 71545 |
| 228.1 Hemangion     | 0.605145 | 0.846378 | 0.71848  | 0.000114 | 72147 | 264  | 71883 |
| 565.1 Anal and re   | 0.693075 | 0.885814 | 0.785524 | 0.000117 | 68004 | 443  | 67561 |
| 840.3 Joint/ligam   | 0.751254 | 0.910008 | 0.828206 | 0.000117 | 64295 | 729  | 63566 |
| 204 Leukemia        | 1.087771 | 1.310609 | 1.199967 | 0.000126 | 72103 | 363  | 71740 |
| 724 Other and u     | 0.771122 | 0.918497 | 0.842852 | 0.000128 | 63446 | 814  | 62632 |
| 278.3 Localized ac  | 1.110676 | 1.416103 | 1.267314 | 0.000129 | 60068 | 169  | 59899 |
| 172.3 Carcinoma     | 0.456525 | 0.772208 | 0.598198 | 0.00013  | 65910 | 116  | 65794 |
| 38.2 Gram positi    | 1.146934 | 1.743395 | 1.478621 | 0.000134 | 71106 | 24   | 71082 |
| 250.12 Type 1 diab  | 1.137911 | 1.579854 | 1.371701 | 0.000136 | 62229 | 71   | 62158 |
| 560 Intestinal o    | 1.068498 | 1.236116 | 1.152359 | 0.000137 | 61249 | 628  | 60621 |
| 624 Symptoms i      | 0.753173 | 0.912004 | 0.830112 | 0.000138 | 64610 | 721  | 63889 |
| 276.12 Hyposmola    | 1.067633 | 1.232955 | 1.150178 | 0.000139 | 64752 | 668  | 64084 |
| 573.2 Liver replac  | 1.145096 | 1.713845 | 1.457506 | 0.000152 | 65220 | 30   | 65190 |
| 612 Breast conc     | 0.759844 | 0.915551 | 0.835427 | 0.000158 | 62454 | 721  | 61733 |
| 481 Influenza       | 0.729226 | 0.903558 | 0.813275 | 0.000158 | 63458 | 579  | 62879 |
| 362 Other retin     | 0.841327 | 0.946305 | 0.892988 | 0.000162 | 69904 | 1639 | 68265 |
| 204.21 Myeloid leu  | 1.124076 | 1.513831 | 1.328841 | 0.000163 | 71831 | 91   | 71740 |
| 274 Gout and o      | 1.064753 | 1.227269 | 1.145892 | 0.000171 | 72901 | 638  | 72263 |

|                    |          |          |          |          |       |      |       |
|--------------------|----------|----------|----------|----------|-------|------|-------|
| 964 Poisoning b    | 1.139437 | 1.746338 | 1.477972 | 0.000174 | 68619 | 22   | 68597 |
| 345 Epilepsy, re   | 1.038127 | 1.128186 | 1.082813 | 0.000178 | 66541 | 2904 | 63637 |
| 302 Sexual and     | 0.578575 | 0.839628 | 0.700213 | 0.000179 | 49016 | 224  | 48792 |
| 285.21 Anemia in c | 1.133931 | 1.602087 | 1.38389  | 0.00018  | 66720 | 51   | 66669 |
| 722.1 Displaceme   | 0.825051 | 0.940986 | 0.881946 | 0.000181 | 64025 | 1393 | 62632 |
| 622.1 Polyp of col | 0.731468 | 0.905588 | 0.815521 | 0.000184 | 71741 | 577  | 71164 |
| 634 Miscarriage    | 0.807817 | 0.934866 | 0.869857 | 0.000184 | 68681 | 1348 | 67333 |
| 612.2 Hypertroph   | 0.720229 | 0.901112 | 0.8074   | 0.000184 | 62236 | 503  | 61733 |
| 395.4 Nonrheumã    | 1.120866 | 1.50505  | 1.322113 | 0.00019  | 68734 | 98   | 68636 |
| 381.1 Otitis medi  | 0.819543 | 0.939274 | 0.878222 | 0.000191 | 65625 | 1339 | 64286 |
| 804 Fracture of    | 0.773975 | 0.922495 | 0.8462   | 0.000194 | 67389 | 862  | 66527 |
| 710.12 Chronic ost | 1.119171 | 1.522504 | 1.334325 | 0.000198 | 64837 | 70   | 64767 |
| 287.1 Spontaneou   | 0.574223 | 0.839828 | 0.697616 | 0.000209 | 68588 | 219  | 68369 |
| 531.4 Peptic ulcer | 1.092898 | 1.359218 | 1.22871  | 0.000213 | 71766 | 221  | 71545 |
| 221 Benign neo     | 0.583356 | 0.844309 | 0.70495  | 0.000213 | 63154 | 223  | 62931 |
| 965 Poisoning b    | 1.100716 | 1.391832 | 1.248405 | 0.000213 | 68830 | 233  | 68597 |
| 740.9 Osteoarthr   | 0.907692 | 0.970497 | 0.938807 | 0.000216 | 66792 | 5285 | 61507 |
| 288.1 Decreased '  | 0.707485 | 0.897763 | 0.798771 | 0.00022  | 66343 | 485  | 65858 |
| 240 Simple and     | 0.80808  | 0.936176 | 0.87073  | 0.000228 | 59596 | 1130 | 58466 |
| 227 Benign neo     | 1.066171 | 1.243789 | 1.155193 | 0.000244 | 71955 | 584  | 71371 |
| 444.1 Arterial em  | 1.125852 | 1.62237  | 1.395831 | 0.000245 | 69454 | 36   | 69418 |
| 947 Urticaria      | 0.796035 | 0.932359 | 0.862569 | 0.000248 | 63321 | 1027 | 62294 |
| 509.5 Respiratory  | 1.133109 | 1.740528 | 1.469421 | 0.000249 | 68253 | 25   | 68228 |
| 624.9 stress incor | 0.817731 | 0.940237 | 0.877799 | 0.000254 | 65116 | 1227 | 63889 |
| 395.2 Nonrheumã    | 1.06124  | 1.225655 | 1.143399 | 0.000264 | 69282 | 646  | 68636 |
| 575.8 Other disor  | 1.081314 | 1.313894 | 1.198866 | 0.000266 | 70708 | 331  | 70377 |
| 324 Other CNS i    | 1.114966 | 1.518376 | 1.328804 | 0.000271 | 72744 | 74   | 72670 |
| 575.2 Obstructior  | 1.119569 | 1.565421 | 1.358658 | 0.000277 | 70433 | 56   | 70377 |
| 975 Poisoning b    | 1.136702 | 1.733136 | 1.462602 | 0.000284 | 68632 | 35   | 68597 |
| 619.2 Disorders o  | 0.823948 | 0.943474 | 0.882486 | 0.000299 | 68102 | 1410 | 66692 |
| 697 Sarcoidosis    | 1.078885 | 1.309075 | 1.194833 | 0.000312 | 64727 | 303  | 64424 |
| 728.71 Contracture | 0.420077 | 0.768831 | 0.573833 | 0.000325 | 58975 | 88   | 58887 |
| 698 Pruritus an    | 0.784355 | 0.930102 | 0.855323 | 0.000328 | 71939 | 863  | 71076 |

|        |                |          |          |          |          |       |      |       |
|--------|----------------|----------|----------|----------|----------|-------|------|-------|
| 287.32 | Secondary f    | 1.116343 | 1.559858 | 1.352999 | 0.000337 | 68434 | 65   | 68369 |
| 459    | Other disor    | 1.067924 | 1.262983 | 1.165903 | 0.000337 | 71228 | 463  | 70765 |
| 750    | Digestive co   | 0.616683 | 0.865707 | 0.73366  | 0.00035  | 72019 | 259  | 71760 |
| 599.6  | Oliguria and   | 1.118541 | 1.629052 | 1.396856 | 0.000353 | 58774 | 35   | 58739 |
| 764    | Sciatica       | 0.802586 | 0.937087 | 0.868341 | 0.000357 | 67793 | 969  | 66824 |
| 458.2  | Iatrogenic f   | 1.113633 | 1.562677 | 1.355092 | 0.000358 | 70822 | 57   | 70765 |
| 741.3  | Difficulty in  | 0.754267 | 0.920087 | 0.834681 | 0.000369 | 65826 | 615  | 65211 |
| 994.1  | Systemic in    | 1.115052 | 1.566024 | 1.355356 | 0.000394 | 73036 | 66   | 72970 |
| 480.1  | Bacterial pr   | 1.079564 | 1.328448 | 1.206028 | 0.000398 | 63128 | 249  | 62879 |
| 526.4  | Temporom       | 0.707613 | 0.90364  | 0.801647 | 0.000399 | 68799 | 471  | 68328 |
| 681.7  | Cellulitis an  | 1.066446 | 1.261509 | 1.163832 | 0.000405 | 66318 | 510  | 65808 |
| 389.2  | Conductive     | 0.717634 | 0.907734 | 0.809043 | 0.000413 | 68059 | 499  | 67560 |
| 706.8  | Other speci    | 0.515248 | 0.822783 | 0.655515 | 0.000414 | 66180 | 137  | 66043 |
| 214.1  | Lipoma of s    | 0.657322 | 0.884752 | 0.765238 | 0.000422 | 72143 | 310  | 71833 |
| 420.22 | Chronic per    | 1.113913 | 1.613495 | 1.385571 | 0.000423 | 71947 | 40   | 71907 |
| 244.1  | Secondary l    | 0.848965 | 0.953896 | 0.900596 | 0.000431 | 60221 | 1755 | 58466 |
| 331.9  | Cerebral de    | 1.079308 | 1.3283   | 1.204214 | 0.000444 | 63896 | 259  | 63637 |
| 733    | Other disor    | 0.698047 | 0.901337 | 0.795471 | 0.000456 | 65780 | 401  | 65379 |
| 312    | Conduct dis    | 1.072415 | 1.293585 | 1.182794 | 0.000457 | 71373 | 441  | 70932 |
| 174.3  | Neoplasm c     | 0.595729 | 0.861016 | 0.719631 | 0.000472 | 64589 | 208  | 64381 |
| 704.11 | Alopecia Ar    | 0.507103 | 0.821694 | 0.650017 | 0.000478 | 67973 | 132  | 67841 |
| 291    | Other speci    | 1.04709  | 1.183398 | 1.114975 | 0.000493 | 68019 | 1091 | 66928 |
| 255.1  | Adrenal hyp    | 1.077484 | 1.330495 | 1.205922 | 0.000506 | 67258 | 263  | 66995 |
| 245.21 | Chronic lym    | 0.774959 | 0.930231 | 0.850422 | 0.000511 | 59269 | 803  | 58466 |
| 302.1  | Decreased l    | 0.550191 | 0.842617 | 0.684912 | 0.000511 | 48964 | 172  | 48792 |
| 715.1  | Sacroiliitis f | 0.702668 | 0.904787 | 0.799577 | 0.000532 | 65268 | 427  | 64841 |
| 245.2  | Chronic thy    | 0.778207 | 0.932054 | 0.853014 | 0.000556 | 59286 | 820  | 58466 |
| 573.9  | Abnormal s     | 1.068868 | 1.291025 | 1.180499 | 0.000578 | 65572 | 382  | 65190 |
| 381.11 | Suppurative    | 0.801441 | 0.940399 | 0.869272 | 0.000598 | 65273 | 987  | 64286 |
| 958    | Certain earl   | 1.089249 | 1.417348 | 1.258823 | 0.000602 | 73154 | 145  | 73009 |
| 477    | Epistaxis or   | 0.71908  | 0.912227 | 0.812055 | 0.000611 | 54229 | 427  | 53802 |
| 989    | Toxic effect   | 1.103765 | 1.531319 | 1.328968 | 0.000619 | 72918 | 79   | 72839 |
| 743.4  | Stress fract   | 0.575003 | 0.856867 | 0.70574  | 0.000628 | 63954 | 192  | 63762 |

|                              |          |          |          |          |       |      |       |
|------------------------------|----------|----------|----------|----------|-------|------|-------|
| 740.2 Osteoarthritis         | 1.032983 | 1.129215 | 1.080754 | 0.00063  | 63543 | 2036 | 61507 |
| 610.8 Other specific         | 0.539361 | 0.841496 | 0.678067 | 0.000631 | 61882 | 149  | 61733 |
| 705.3 Hidradenitis           | 1.094382 | 1.43858  | 1.269112 | 0.000649 | 66184 | 141  | 66043 |
| 443.9 Peripheral neuropathy  | 1.056478 | 1.239885 | 1.148264 | 0.000709 | 69917 | 499  | 69418 |
| 930 Allergic reactions       | 0.669663 | 0.89676  | 0.777523 | 0.00074  | 62630 | 336  | 62294 |
| 255.2 Adrenal hypofunction   | 1.071279 | 1.325099 | 1.200188 | 0.000775 | 67268 | 273  | 66995 |
| 540 Appendicitis             | 0.681142 | 0.902213 | 0.786225 | 0.000804 | 73072 | 399  | 72673 |
| 614.3 Pelvic inflammation    | 0.701648 | 0.909442 | 0.800967 | 0.000804 | 65882 | 411  | 65471 |
| 726.3 Bursitis               | 0.752262 | 0.926639 | 0.836757 | 0.000815 | 59428 | 541  | 58887 |
| 260.6 Anorexia               | 1.08266  | 1.401561 | 1.246301 | 0.000825 | 62147 | 151  | 61996 |
| 567 Peritonitis              | 1.090015 | 1.461721 | 1.283552 | 0.000832 | 67670 | 109  | 67561 |
| 331.1 Hydrocephalus          | 1.074384 | 1.344266 | 1.210324 | 0.000851 | 63900 | 263  | 63637 |
| 159.3 Malignant neoplasm     | 1.093493 | 1.694871 | 1.428274 | 0.000873 | 70798 | 21   | 70777 |
| 227.3 Benign neoplasm        | 1.072676 | 1.342156 | 1.209334 | 0.0009   | 71619 | 248  | 71371 |
| 516 Abnormal sensation       | 1.07049  | 1.329149 | 1.201303 | 0.000906 | 73074 | 249  | 72825 |
| 531.2 Gastric ulcer          | 1.074938 | 1.36276  | 1.222145 | 0.00092  | 71737 | 192  | 71545 |
| 374.3 Ptosis of eye          | 0.705226 | 0.91225  | 0.804608 | 0.000945 | 63924 | 372  | 63552 |
| 724.8 Other symptoms         | 0.552543 | 0.854956 | 0.691653 | 0.000949 | 62792 | 160  | 62632 |
| 771.2 Cramp of limb          | 0.668455 | 0.89983  | 0.778328 | 0.000964 | 69799 | 293  | 69506 |
| 286.7 Other and unspecified  | 1.04273  | 1.184143 | 1.113021 | 0.000972 | 69498 | 1129 | 68369 |
| 433.2 Occlusion of eye       | 1.042187 | 1.182299 | 1.111833 | 0.000988 | 69335 | 948  | 68387 |
| 516.1 Hemoptysis             | 1.0708   | 1.33795  | 1.206037 | 0.000992 | 73057 | 232  | 72825 |
| 291.1 Transient neurological | 1.090545 | 1.517186 | 1.315953 | 0.001038 | 67005 | 77   | 66928 |
| 41.1 Staphylococcal          | 1.070528 | 1.340474 | 1.20731  | 0.001041 | 71334 | 252  | 71082 |
| 809 Fracture of              | 0.789022 | 0.941232 | 0.863127 | 0.00108  | 67338 | 811  | 66527 |
| 758 Chromosomal              | 1.093164 | 1.495932 | 1.299194 | 0.001087 | 72345 | 130  | 72215 |
| 530.12 Ulcer of esophagus    | 1.086835 | 1.537731 | 1.329262 | 0.001101 | 58096 | 52   | 58044 |
| 695 Erythematous             | 0.872042 | 0.966172 | 0.918487 | 0.001151 | 66629 | 2205 | 64424 |
| 427.1 Paroxysmal             | 1.03712  | 1.163328 | 1.099885 | 0.001158 | 60140 | 1261 | 58879 |
| 395.1 Nonrheumatoid          | 1.035783 | 1.158267 | 1.096681 | 0.001211 | 69938 | 1302 | 68636 |
| 289.3 Personal history       | 1.081642 | 1.73077  | 1.446581 | 0.001267 | 65880 | 22   | 65858 |
| 70.9 Hepatitis Non           | 1.063189 | 1.311815 | 1.188299 | 0.001308 | 63407 | 285  | 63122 |
| 442.11 Abdominal             | 1.074496 | 1.4045   | 1.244272 | 0.001315 | 69538 | 120  | 69418 |

|                     |          |          |          |          |       |      |       |
|---------------------|----------|----------|----------|----------|-------|------|-------|
| 710.11 Acute osteo  | 1.080622 | 1.582294 | 1.355016 | 0.00139  | 64807 | 40   | 64767 |
| 339 Other head      | 0.655071 | 0.903511 | 0.772397 | 0.001665 | 66496 | 281  | 66215 |
| 274.2 Crystal arth  | 0.556739 | 0.868296 | 0.699968 | 0.001694 | 72406 | 143  | 72263 |
| 430.3 Subdural hē   | 1.076781 | 1.471996 | 1.282341 | 0.00173  | 68472 | 85   | 68387 |
| 151 Cancer of st    | 1.076434 | 1.629755 | 1.380712 | 0.001753 | 70809 | 32   | 70777 |
| 738 Other acqu      | 0.793014 | 0.946894 | 0.868032 | 0.001774 | 67913 | 750  | 67163 |
| 618.2 Uterine/Ute   | 0.698457 | 0.919345 | 0.80405  | 0.001892 | 71746 | 336  | 71410 |
| 341 Other demy      | 0.771985 | 0.941853 | 0.854273 | 0.001922 | 64325 | 688  | 63637 |
| 750.2 Lower gastr   | 0.594416 | 0.885945 | 0.729776 | 0.002009 | 71949 | 189  | 71760 |
| 758.1 Chromoson     | 1.082638 | 1.526088 | 1.310876 | 0.002013 | 72320 | 105  | 72215 |
| 452.2 Deep vein t   | 1.052927 | 1.286049 | 1.170195 | 0.002094 | 66051 | 328  | 65723 |
| 362.6 Peripheral i  | 0.537445 | 0.86634  | 0.687433 | 0.002134 | 68395 | 130  | 68265 |
| 540.1 Appendiciti   | 0.68627  | 0.918106 | 0.796331 | 0.002185 | 73041 | 368  | 72673 |
| 750.21 Congenital   | 0.541182 | 0.868435 | 0.690523 | 0.002189 | 71899 | 139  | 71760 |
| 172.1 Melanomas     | 0.772138 | 0.943108 | 0.855167 | 0.002191 | 66412 | 618  | 65794 |
| 246.7 Abnormal r    | 0.735052 | 0.932722 | 0.830139 | 0.002202 | 58940 | 474  | 58466 |
| 649.1 Diabetes or   | 1.039877 | 1.203259 | 1.120637 | 0.00223  | 69568 | 910  | 68658 |
| 286.8 Hypercoagu    | 1.053656 | 1.304827 | 1.179962 | 0.00246  | 68696 | 327  | 68369 |
| 577.2 Chronic par   | 1.066112 | 1.438528 | 1.259708 | 0.002498 | 72611 | 109  | 72502 |
| 368.91 Psychophys   | 1.071493 | 1.541965 | 1.321623 | 0.002506 | 69395 | 63   | 69332 |
| 585.2 Renal failur  | 1.066638 | 1.508317 | 1.301112 | 0.002622 | 68632 | 60   | 68572 |
| 256 Ovarian dys     | 1.030666 | 1.159483 | 1.094576 | 0.002643 | 68400 | 1405 | 66995 |
| 227.1 Benign neo    | 1.058762 | 1.369282 | 1.218067 | 0.00265  | 71532 | 161  | 71371 |
| 726.2 Synoviopati   | 0.48573  | 0.851984 | 0.649699 | 0.002691 | 58980 | 93   | 58887 |
| 327.41 Organic or j | 0.699473 | 0.925202 | 0.8073   | 0.002736 | 62043 | 330  | 61713 |
| 623 Hypertroph      | 0.583015 | 0.888779 | 0.724308 | 0.002759 | 71326 | 162  | 71164 |
| 440.21 Atheroscler  | 1.058523 | 1.674787 | 1.400918 | 0.002804 | 69440 | 22   | 69418 |
| 474 Acute and c     | 0.804366 | 0.954899 | 0.877676 | 0.002886 | 54720 | 918  | 53802 |
| 559 Ileostomy s     | 1.064872 | 1.51277  | 1.30295  | 0.002889 | 60684 | 63   | 60621 |
| 597.8 Urethral hy   | 0.647544 | 0.910417 | 0.771484 | 0.00289  | 69941 | 237  | 69704 |
| 433.21 Cerebral ar  | 1.033113 | 1.180064 | 1.106148 | 0.002951 | 69245 | 858  | 68387 |
| 440.22 Atheroscler  | 1.054287 | 1.344488 | 1.2023   | 0.002962 | 69594 | 176  | 69418 |
| 599.2 Retention c   | 0.807621 | 0.956132 | 0.880174 | 0.003061 | 59563 | 824  | 58739 |

|                      |          |          |          |          |       |      |       |
|----------------------|----------|----------|----------|----------|-------|------|-------|
| 681.3 Cellulitis an  | 1.043582 | 1.252305 | 1.147683 | 0.003105 | 66253 | 445  | 65808 |
| 288.11 Neutropeni    | 0.653356 | 0.914163 | 0.776162 | 0.003145 | 66107 | 249  | 65858 |
| 277.7 Dysmetabo      | 1.043756 | 1.26185  | 1.152997 | 0.00332  | 72159 | 396  | 71763 |
| 386.1 Meniere's c    | 0.656341 | 0.915992 | 0.778959 | 0.003361 | 64202 | 239  | 63963 |
| 540.11 Acute appe    | 0.678393 | 0.922911 | 0.794106 | 0.003365 | 73003 | 330  | 72673 |
| 182 Malignant r      | 1.048366 | 1.311436 | 1.181859 | 0.003454 | 64979 | 226  | 64753 |
| 54 Herpes sim        | 0.772355 | 0.94891  | 0.857788 | 0.003513 | 63740 | 618  | 63122 |
| 454 Varicose ve      | 0.765869 | 0.947194 | 0.853615 | 0.003536 | 66270 | 547  | 65723 |
| 274.21 Chondrocal    | 0.560999 | 0.887611 | 0.710893 | 0.003639 | 72395 | 132  | 72263 |
| 525 Other disea      | 0.761109 | 0.946526 | 0.850663 | 0.003667 | 68851 | 523  | 68328 |
| 704.12 Telogen eff   | 0.544404 | 0.883977 | 0.699173 | 0.003884 | 67969 | 128  | 67841 |
| 79 Viral infecti     | 0.850199 | 0.969301 | 0.908579 | 0.004162 | 64599 | 1477 | 63122 |
| 772.3 Muscle wea     | 0.848261 | 0.968843 | 0.907489 | 0.004217 | 69475 | 1310 | 68165 |
| 459.9 Circulatory    | 1.039388 | 1.25567  | 1.147875 | 0.004286 | 71143 | 378  | 70765 |
| 427.5 Arrhythmia     | 1.024489 | 1.147571 | 1.085597 | 0.004552 | 60205 | 1326 | 58879 |
| 690 Erythematc       | 0.740097 | 0.944711 | 0.838636 | 0.004769 | 64834 | 410  | 64424 |
| 242.1 Graves' dise   | 0.806669 | 0.960952 | 0.881852 | 0.004892 | 59272 | 806  | 58466 |
| 313.1 Attention d    | 0.788211 | 0.956914 | 0.869972 | 0.004905 | 71727 | 795  | 70932 |
| 352 Disorders o      | 0.800314 | 0.959561 | 0.877918 | 0.004952 | 67319 | 725  | 66594 |
| 242 Thyrotoxicc      | 0.856273 | 0.972028 | 0.91316  | 0.004995 | 59931 | 1465 | 58466 |
| 689 Disorder of      | 0.807265 | 0.961471 | 0.882492 | 0.005095 | 71030 | 783  | 70247 |
| 599.4 Urinary inc    | 0.883277 | 0.97783  | 0.929984 | 0.005156 | 60808 | 2069 | 58739 |
| 292 Neurologic       | 1.016043 | 1.097253 | 1.056379 | 0.005175 | 70063 | 3135 | 66928 |
| 426.24 Atrioventric  | 1.0433   | 1.332263 | 1.189638 | 0.005331 | 59064 | 185  | 58879 |
| 214 Lipoma           | 0.765444 | 0.952526 | 0.855941 | 0.005345 | 72343 | 510  | 71833 |
| 626.14 Irregular m   | 0.718784 | 0.94165  | 0.825375 | 0.005397 | 51286 | 358  | 50928 |
| 579 Other symp       | 0.88557  | 0.97883  | 0.931595 | 0.00555  | 66210 | 2303 | 63907 |
| 580 Nephritis; n     | 1.039762 | 1.293965 | 1.167684 | 0.005571 | 68864 | 292  | 68572 |
| 446.4 Wegener's      | 1.032969 | 1.633164 | 1.367309 | 0.005737 | 69446 | 28   | 69418 |
| 264.1 Short statu    | 0.329415 | 0.815544 | 0.527165 | 0.005765 | 62050 | 54   | 61996 |
| 751.11 Congenital    | 0.569277 | 0.904386 | 0.72242  | 0.005991 | 71921 | 161  | 71760 |
| 345.12 Partial epile | 0.810914 | 0.964557 | 0.885717 | 0.006142 | 64519 | 882  | 63637 |
| 800.2 Fracture of    | 1.045278 | 1.426159 | 1.242628 | 0.006161 | 66637 | 110  | 66527 |

|                                                    |          |          |          |          |       |      |       |
|----------------------------------------------------|----------|----------|----------|----------|-------|------|-------|
| 442.1 Aortic aneurysm                              | 1.036663 | 1.28627  | 1.162762 | 0.00617  | 69674 | 256  | 69418 |
| 789 Nausea and vomiting                            | 0.92807  | 0.987703 | 0.957629 | 0.00643  | 69199 | 6457 | 62742 |
| 817 Concussion                                     | 0.748593 | 0.951675 | 0.846214 | 0.006445 | 71798 | 490  | 71308 |
| 727.2 Bursitis                                     | 0.674224 | 0.933634 | 0.797276 | 0.006475 | 59120 | 233  | 58887 |
| 384.4 Perforation                                  | 0.645445 | 0.926791 | 0.777515 | 0.0065   | 64501 | 215  | 64286 |
| 526.3 Anomalies of development                     | 0.516585 | 0.890908 | 0.684427 | 0.006503 | 68446 | 118  | 68328 |
| 433.8 Late effects of radiation therapy            | 1.027613 | 1.197621 | 1.112178 | 0.006506 | 69012 | 625  | 68387 |
| 224.1 Benign neoplasms                             | 0.583334 | 0.910093 | 0.733894 | 0.006528 | 72144 | 148  | 71996 |
| 473.1 Chronic laryngitis                           | 0.638166 | 0.924925 | 0.772767 | 0.006587 | 53992 | 190  | 53802 |
| 614.53 Cyst or abscess                             | 0.504554 | 0.889035 | 0.67656  | 0.00699  | 65566 | 95   | 65471 |
| 426.21 First degree burn                           | 1.042405 | 1.44517  | 1.251061 | 0.007003 | 58964 | 85   | 58879 |
| 530 Diseases of the eye                            | 1.009019 | 1.059615 | 1.034135 | 0.007156 | 67361 | 9317 | 58044 |
| 571.6 Primary biliary cirrhosis                    | 1.040297 | 1.396899 | 1.224012 | 0.007186 | 65317 | 127  | 65190 |
| 592.11 Acute cystitis                              | 0.665051 | 0.934626 | 0.792154 | 0.007367 | 56885 | 230  | 56655 |
| 384 Other disorders of the eye                     | 0.665928 | 0.934925 | 0.792873 | 0.007431 | 64525 | 239  | 64286 |
| 362.2 Degenerative diseases of the eye             | 0.836098 | 0.971658 | 0.9026   | 0.007544 | 69225 | 960  | 68265 |
| 704.8 Other specific diseases of the thyroid gland | 0.728565 | 0.949859 | 0.834576 | 0.007607 | 68207 | 366  | 67841 |
| 193 Thyroid carcinoma                              | 0.786501 | 0.962077 | 0.871713 | 0.007628 | 71995 | 624  | 71371 |
| 575.9 Nonspecific infectious diseases of the eye   | 1.02295  | 1.688296 | 1.392983 | 0.007645 | 70402 | 25   | 70377 |
| 736.2 Acquired diseases of the eye                 | 0.557534 | 0.908178 | 0.717664 | 0.007848 | 67284 | 121  | 67163 |
| 369.2 Eye infections                               | 0.636717 | 0.929199 | 0.773861 | 0.007987 | 63732 | 180  | 63552 |
| 411.41 Aneurysm of the eye                         | 1.030853 | 1.550045 | 1.312193 | 0.008094 | 67417 | 43   | 67374 |
| 251 Other disorders of the eye                     | 1.036977 | 1.373344 | 1.209173 | 0.008142 | 67128 | 133  | 66995 |
| 649 Other conditions of the eye                    | 1.014842 | 1.106981 | 1.060383 | 0.008182 | 71923 | 3265 | 68658 |
| 536.8 Dyspepsia                                    | 0.853459 | 0.976199 | 0.913711 | 0.008507 | 69406 | 1318 | 68088 |
| 751.1 Congenital anomalies of the eye              | 0.588574 | 0.920337 | 0.74088  | 0.008671 | 71929 | 169  | 71760 |
| 526.41 Temporomandibular joint dysfunction         | 0.633116 | 0.930768 | 0.772208 | 0.008692 | 68515 | 187  | 68328 |
| 358 Myoneural degeneration                         | 1.035185 | 1.420947 | 1.235786 | 0.008776 | 70529 | 99   | 70430 |
| 523.3 Periodontitis                                | 0.626981 | 0.929637 | 0.768112 | 0.008789 | 68502 | 174  | 68328 |
| 526.42 Arthralgia/arthritis                        | 0.564348 | 0.914192 | 0.724048 | 0.008851 | 68464 | 136  | 68328 |
| 681.1 Cellulitis and abscess                       | 0.776936 | 0.962749 | 0.866912 | 0.00911  | 66336 | 528  | 65808 |
| 443 Peripheral vascular disease                    | 1.019582 | 1.159225 | 1.089095 | 0.009179 | 70392 | 974  | 69418 |
| 707.3 Chronic ulcer                                | 1.034246 | 1.450011 | 1.250803 | 0.00941  | 72637 | 85   | 72552 |



|                     |          |          |          |          |       |      |       |
|---------------------|----------|----------|----------|----------|-------|------|-------|
| 528.4 Cysts of ora  | 0.284638 | 0.820497 | 0.495089 | 0.009499 | 70677 | 35   | 70642 |
| 723 Other disor     | 0.765772 | 0.961216 | 0.860228 | 0.009506 | 63110 | 478  | 62632 |
| 619.1 Noninflamr    | 0.785042 | 0.965105 | 0.872254 | 0.009526 | 67306 | 614  | 66692 |
| 535.1 Acute gastr   | 0.647306 | 0.936785 | 0.782991 | 0.009618 | 68289 | 201  | 68088 |
| 368 Visual distu    | 0.877985 | 0.981561 | 0.929042 | 0.009699 | 71174 | 1842 | 69332 |
| 759 Other and t     | 1.033425 | 1.34631  | 1.190576 | 0.009984 | 72417 | 202  | 72215 |
| 260.2 severe prot   | 1.033425 | 1.417397 | 1.230756 | 0.010182 | 62117 | 121  | 61996 |
| 313 Pervasive d     | 0.810529 | 0.970778 | 0.888427 | 0.010209 | 71830 | 898  | 70932 |
| 711.1 Pyogenic ar   | 1.002082 | 1.662683 | 1.374299 | 0.010397 | 64788 | 21   | 64767 |
| 575.7 Other disor   | 1.028539 | 1.29132  | 1.160276 | 0.010636 | 70658 | 281  | 70377 |
| 588 Disorders r     | 1.030441 | 1.390934 | 1.21628  | 0.010647 | 68696 | 124  | 68572 |
| 386.3 Labyrinthiti  | 0.572455 | 0.922067 | 0.732636 | 0.01072  | 64087 | 124  | 63963 |
| 733.9 Chondroma     | 0.633467 | 0.936482 | 0.775157 | 0.01084  | 65554 | 175  | 65379 |
| 433.3 Cerebral isc  | 1.014754 | 1.128462 | 1.071193 | 0.011147 | 69876 | 1489 | 68387 |
| 694.1 Vitiligo      | 0.372546 | 0.865895 | 0.578416 | 0.011232 | 64473 | 49   | 64424 |
| 338.2 Chronic pai   | 1.017116 | 1.154504 | 1.085352 | 0.011325 | 69591 | 1087 | 68504 |
| 342 Hemiplegia      | 1.024519 | 1.246752 | 1.135141 | 0.011482 | 64018 | 381  | 63637 |
| 286.81 Primary hyp  | 1.027152 | 1.296306 | 1.16218  | 0.011593 | 68660 | 291  | 68369 |
| 795.8 Abnormal t    | 1.025557 | 1.467422 | 1.258499 | 0.011629 | 72902 | 69   | 72833 |
| 242.31 Thyrotoxic   | 1.022668 | 1.529342 | 1.293406 | 0.011668 | 58517 | 51   | 58466 |
| 562.2 Diverticuliti | 0.764834 | 0.964332 | 0.86135  | 0.011707 | 61046 | 425  | 60621 |
| 946 Anaphylact      | 0.748148 | 0.961633 | 0.850844 | 0.01177  | 62677 | 383  | 62294 |
| 735.21 Hammer to    | 0.771104 | 0.965667 | 0.865373 | 0.011878 | 67604 | 441  | 67163 |
| 790.6 Other abno    | 0.882234 | 0.984185 | 0.932525 | 0.012307 | 70062 | 1873 | 68189 |
| 714.2 Juvenile rhe  | 1.027323 | 1.545394 | 1.297565 | 0.012533 | 64913 | 72   | 64841 |
| 705 Disorders o     | 1.026365 | 1.304853 | 1.165644 | 0.01255  | 66269 | 226  | 66043 |
| 695.42 Systemic lu  | 1.01748  | 1.173119 | 1.094891 | 0.012606 | 63934 | 799  | 63135 |
| 690.1 Seborrhelic   | 0.753032 | 0.964574 | 0.854991 | 0.013259 | 64812 | 388  | 64424 |
| 505 Other pulm      | 1.024509 | 1.508744 | 1.277057 | 0.01335  | 68296 | 68   | 68228 |
| 327.31 Central/nor  | 1.016601 | 1.536322 | 1.294763 | 0.013377 | 61756 | 43   | 61713 |
| 795.82 Elevated ca  | 1.001679 | 1.613625 | 1.340512 | 0.01359  | 72862 | 29   | 72833 |
| 715 Other inflar    | 0.797216 | 0.972728 | 0.882577 | 0.013963 | 65463 | 622  | 64841 |
| 580.31 Nephritis ai | 1.021816 | 1.446464 | 1.242551 | 0.014518 | 68659 | 87   | 68572 |

|                      |          |          |          |          |       |      |       |
|----------------------|----------|----------|----------|----------|-------|------|-------|
| 425.11 Hypertroph    | 1.020602 | 1.454559 | 1.247175 | 0.014527 | 71982 | 75   | 71907 |
| 536.3 Gastropare     | 1.022926 | 1.327056 | 1.176765 | 0.014542 | 68288 | 200  | 68088 |
| 579.8 Nonspecific    | 0.66909  | 0.95195  | 0.802424 | 0.01462  | 64120 | 213  | 63907 |
| 724.2 Disorders o    | 0.529615 | 0.923073 | 0.706773 | 0.014647 | 62730 | 98   | 62632 |
| 722.9 Other and u    | 1.021571 | 1.394544 | 1.213264 | 0.015085 | 62748 | 116  | 62632 |
| 350 Abnormal r       | 0.894814 | 0.987621 | 0.940656 | 0.015119 | 71713 | 2301 | 69412 |
| 202.21 Nodular lyn   | 0.58362  | 0.937005 | 0.74553  | 0.015309 | 71867 | 127  | 71740 |
| 430 Intracranial     | 1.017263 | 1.209944 | 1.113171 | 0.015498 | 68890 | 503  | 68387 |
| 250.41 Impaired fa   | 0.851899 | 0.982735 | 0.916075 | 0.016237 | 63312 | 1154 | 62158 |
| 727.8 Plica syndr    | 0.576085 | 0.937365 | 0.741437 | 0.016306 | 59012 | 125  | 58887 |
| 519.2 Respiratory    | 1.017759 | 1.456383 | 1.245546 | 0.016515 | 70126 | 78   | 70048 |
| 362.5 Toxic macu     | 0.600126 | 0.943716 | 0.758606 | 0.017044 | 68400 | 135  | 68265 |
| 513.31 Apnea         | 1.006319 | 1.582515 | 1.315165 | 0.017135 | 71969 | 40   | 71929 |
| 720 Spinal stenc     | 0.875159 | 0.986272 | 0.929909 | 0.017204 | 64119 | 1487 | 62632 |
| 614.33 Pelvic inflar | 0.679567 | 0.958904 | 0.811113 | 0.017306 | 65707 | 236  | 65471 |
| 157 Pancreatic c     | 1.013587 | 1.434317 | 1.233741 | 0.017463 | 70853 | 76   | 70777 |
| 736 Other acqu       | 0.722444 | 0.965609 | 0.838642 | 0.017621 | 67462 | 299  | 67163 |
| 279.1 Immunity d     | 0.864117 | 0.985157 | 0.92366  | 0.017633 | 70276 | 1311 | 68965 |
| 281.9 Deficiency :   | 0.998596 | 1.617372 | 1.333679 | 0.017872 | 66703 | 34   | 66669 |
| 636 Early or thr     | 0.902254 | 0.990154 | 0.945578 | 0.018307 | 70618 | 3285 | 67333 |
| 738.4 Acquired sp    | 0.787015 | 0.97591  | 0.878737 | 0.018651 | 67650 | 487  | 67163 |
| 967 Adverse eff      | 1.017175 | 1.296126 | 1.156662 | 0.018938 | 68873 | 276  | 68597 |
| 523.31 Acute peric   | 0.611352 | 0.949918 | 0.767871 | 0.019109 | 68467 | 139  | 68328 |
| 293 Symptoms i       | 0.692128 | 0.963437 | 0.820583 | 0.019321 | 70360 | 243  | 70117 |
| 705.8 Hyperhidro     | 0.745858 | 0.971267 | 0.854078 | 0.019396 | 66409 | 366  | 66043 |
| 296.2 Depression     | 1.004636 | 1.055657 | 1.029966 | 0.019462 | 58279 | 9487 | 48792 |
| 375 Disorders o      | 0.714379 | 0.967239 | 0.835218 | 0.020122 | 65399 | 257  | 65142 |
| 459.1 Hemorrhag      | 1.002164 | 1.51888  | 1.278123 | 0.020246 | 70818 | 53   | 70765 |
| 337.1 Peripheral :   | 1.01228  | 1.423268 | 1.222682 | 0.020996 | 63735 | 98   | 63637 |
| 270.1 Disturbanc     | 0.376505 | 0.906267 | 0.595415 | 0.021158 | 71826 | 51   | 71775 |
| 289.9 Abnormalit     | 1.013281 | 1.385551 | 1.202826 | 0.021184 | 65981 | 123  | 65858 |
| 528.41 Cyst of the   | 0.271471 | 0.874137 | 0.501887 | 0.021436 | 70671 | 29   | 70642 |
| 159 Malignant r      | 1.012054 | 1.334734 | 1.176706 | 0.02146  | 70931 | 154  | 70777 |

|                     |          |          |          |          |       |      |       |
|---------------------|----------|----------|----------|----------|-------|------|-------|
| 365.11 Primary op   | 0.791116 | 0.97896  | 0.88238  | 0.021478 | 68893 | 458  | 68435 |
| 372 Disorders o     | 0.726171 | 0.970845 | 0.843285 | 0.02164  | 63826 | 274  | 63552 |
| 270.33 Amyloidosi   | 0.98859  | 1.579274 | 1.310202 | 0.021645 | 71806 | 31   | 71775 |
| 721.2 Spondylosi    | 0.707851 | 0.968417 | 0.831983 | 0.021688 | 62884 | 252  | 62632 |
| 292.2 Mild cognit   | 0.676052 | 0.963965 | 0.81214  | 0.021862 | 67124 | 196  | 66928 |
| 275.53 Disorders o  | 1.003017 | 1.535215 | 1.2826   | 0.022202 | 70975 | 57   | 70918 |
| 610.2 Fibroadeno    | 0.617191 | 0.956712 | 0.774493 | 0.02266  | 61871 | 138  | 61733 |
| 259.3 Delay in se   | 0.176509 | 0.843399 | 0.401488 | 0.022847 | 67015 | 20   | 66995 |
| 585.33 Chronic Kid  | 1.010671 | 1.222762 | 1.116583 | 0.023445 | 68976 | 404  | 68572 |
| 495.2 Asthma wit    | 1.008793 | 1.153731 | 1.080582 | 0.023744 | 64140 | 1007 | 63133 |
| 724.1 Disorders o   | 0.58306  | 0.952979 | 0.752555 | 0.023753 | 62746 | 114  | 62632 |
| 720.1 Spinal stenc  | 0.853349 | 0.987486 | 0.919217 | 0.023801 | 63621 | 989  | 62632 |
| 963 Poisoning b     | 1.010405 | 1.348197 | 1.181596 | 0.023883 | 68762 | 165  | 68597 |
| 740.11 Osteoarthr   | 0.916902 | 0.993509 | 0.954836 | 0.02397  | 64867 | 3360 | 61507 |
| 965.1 Opiates anc   | 1.010005 | 1.370407 | 1.193041 | 0.023975 | 68743 | 146  | 68597 |
| 250.11 Type 1 diab  | 0.573918 | 0.953893 | 0.746217 | 0.024247 | 62285 | 127  | 62158 |
| 343 Infantile ce    | 1.011968 | 1.421503 | 1.216724 | 0.024285 | 63768 | 131  | 63637 |
| 378 Strabismus      | 0.763189 | 0.978333 | 0.866887 | 0.024365 | 65545 | 403  | 65142 |
| 529.1 Glossitis     | 0.400479 | 0.920079 | 0.618923 | 0.02439  | 70691 | 49   | 70642 |
| 300.4 Dysthymic c   | 1.007699 | 1.14192  | 1.07446  | 0.024428 | 49901 | 1109 | 48792 |
| 772 Symptoms        | 0.751452 | 0.977206 | 0.859845 | 0.024453 | 68532 | 367  | 68165 |
| 555.2 Ulcerative c  | 1.009878 | 1.21558  | 1.11233  | 0.024623 | 61115 | 494  | 60621 |
| 351 Other perip     | 0.908262 | 0.992972 | 0.95017  | 0.02467  | 69342 | 2748 | 66594 |
| 962.2 Insulins anc  | 0.970785 | 1.700163 | 1.371458 | 0.024688 | 68622 | 25   | 68597 |
| 258.1 Postablativ   | 0.484667 | 0.938737 | 0.684303 | 0.025105 | 67062 | 67   | 66995 |
| 368.1 Amblyopia     | 0.569441 | 0.953707 | 0.744167 | 0.025124 | 69440 | 108  | 69332 |
| 364.1 Corneal opa   | 0.673223 | 0.967978 | 0.812256 | 0.025182 | 68627 | 192  | 68435 |
| 153.2 Colon canc    | 1.009185 | 1.243411 | 1.126664 | 0.025303 | 67414 | 299  | 67115 |
| 282.5 Sickle cell a | 1.013856 | 1.55908  | 1.278542 | 0.025349 | 66728 | 59   | 66669 |
| 286.3 Coagulator    | 1.006753 | 1.507565 | 1.260398 | 0.025623 | 68461 | 92   | 68369 |
| 327.1 Hypersomn     | 0.743452 | 0.978002 | 0.855853 | 0.026319 | 62071 | 358  | 61713 |
| 433.11 Occlusion o  | 1.00616  | 1.371926 | 1.192295 | 0.026488 | 68505 | 118  | 68387 |
| 53 Herpes zost      | 0.795044 | 0.983569 | 0.886599 | 0.026803 | 63620 | 498  | 63122 |

|                     |          |          |          |          |       |      |       |
|---------------------|----------|----------|----------|----------|-------|------|-------|
| 427.8 Sinoatrial n  | 1.007538 | 1.192791 | 1.099596 | 0.027471 | 59402 | 523  | 58879 |
| 255.21 Glucocortic  | 1.006671 | 1.31282  | 1.161615 | 0.027518 | 67191 | 196  | 66995 |
| 627.4 Premenopa     | 0.67105  | 0.971493 | 0.812287 | 0.02794  | 51115 | 187  | 50928 |
| 709 Diffuse dise    | 1.005607 | 1.127319 | 1.066113 | 0.028119 | 64732 | 1318 | 63414 |
| 315.3 Mental reta   | 1.007638 | 1.33179  | 1.169552 | 0.028362 | 71135 | 203  | 70932 |
| 364.5 Corneal dys   | 0.640488 | 0.967745 | 0.79349  | 0.02857  | 68580 | 145  | 68435 |
| 750.11 Esophageal   | 0.277389 | 0.901449 | 0.516802 | 0.028988 | 71785 | 25   | 71760 |
| 315 Develomen       | 1.007323 | 1.247649 | 1.12679  | 0.029129 | 71300 | 368  | 70932 |
| 362.27 Drusen (de)  | 0.677031 | 0.972841 | 0.816899 | 0.029243 | 68443 | 178  | 68265 |
| 224 Benign neo      | 0.690156 | 0.974949 | 0.824874 | 0.029324 | 72214 | 218  | 71996 |
| 741.4 Joint effusi  | 0.875458 | 0.992062 | 0.932869 | 0.029448 | 66601 | 1390 | 65211 |
| 378.5 Paralytic str | 0.519855 | 0.953375 | 0.713291 | 0.02963  | 65223 | 81   | 65142 |
| 443.8 Other speci   | 0.989207 | 1.456501 | 1.236405 | 0.030844 | 69478 | 60   | 69418 |
| 440.9 Atheroscler   | 1.005169 | 1.215769 | 1.110436 | 0.030992 | 69800 | 382  | 69418 |
| 802 Fracture of     | 1.00317  | 1.310519 | 1.1583   | 0.031703 | 66712 | 185  | 66527 |
| 842 Other sprai     | 0.647736 | 0.973876 | 0.799952 | 0.032367 | 63725 | 159  | 63566 |
| 529 Diseases an     | 0.616125 | 0.970686 | 0.779972 | 0.032684 | 70776 | 134  | 70642 |
| 306 Other ment      | 0.776312 | 0.986435 | 0.877742 | 0.033068 | 49230 | 438  | 48792 |
| 529.6 Glossodyn     | 0.373925 | 0.936885 | 0.60589  | 0.033414 | 70681 | 39   | 70642 |
| 401.2 Hypertensi    | 1.003395 | 1.110747 | 1.056388 | 0.034316 | 52545 | 1738 | 50807 |
| 531.1 Hemorrhag     | 0.95302  | 1.638954 | 1.331013 | 0.035072 | 71568 | 23   | 71545 |
| 385.5 Tympanosc     | 0.482467 | 0.95839  | 0.69079  | 0.03545  | 64353 | 67   | 64286 |
| 348.4 Cerebral cy   | 0.993265 | 1.416928 | 1.208686 | 0.037566 | 63745 | 108  | 63637 |
| 960 Poisoning b     | 1.001563 | 1.234542 | 1.117532 | 0.037714 | 68978 | 381  | 68597 |
| 528.5 Diseases of   | 0.500172 | 0.964837 | 0.704962 | 0.037808 | 70711 | 69   | 70642 |
| 132 Infestation     | 0.98397  | 1.495962 | 1.249651 | 0.038072 | 72053 | 64   | 71989 |
| 528.1 Stomatitis    | 0.695869 | 0.984054 | 0.832161 | 0.038148 | 70862 | 220  | 70642 |
| 965.3 Salicylates   | 0.953392 | 1.682539 | 1.347523 | 0.038497 | 68626 | 29   | 68597 |
| 580.3 Nephritis a   | 0.994661 | 1.361185 | 1.180736 | 0.038966 | 68710 | 138  | 68572 |
| 281.12 Other vitan  | 0.789181 | 0.991186 | 0.886804 | 0.03906  | 67143 | 474  | 66669 |
| 913 Toxic effect    | 0.700495 | 0.985424 | 0.835353 | 0.039225 | 70787 | 225  | 70562 |
| 279 Disorders ir    | 0.87939  | 0.996061 | 0.936864 | 0.040268 | 70396 | 1431 | 68965 |
| 537 Other disor     | 1.000863 | 1.159504 | 1.079668 | 0.041325 | 68890 | 802  | 68088 |

|                     |          |          |          |          |       |     |       |
|---------------------|----------|----------|----------|----------|-------|-----|-------|
| 260.7 Polyphagia    | 0.961907 | 1.634953 | 1.317955 | 0.041665 | 62036 | 40  | 61996 |
| 362.3 Other nond    | 0.702591 | 0.987393 | 0.837796 | 0.041992 | 68456 | 191 | 68265 |
| 220 Benign neo      | 0.770825 | 0.992022 | 0.877322 | 0.04231  | 63416 | 393 | 63023 |
| 270.3 Disorders o   | 0.998881 | 1.218423 | 1.108552 | 0.042376 | 72139 | 364 | 71775 |
| 709.2 Sicca syndr   | 0.804561 | 0.993621 | 0.896509 | 0.042759 | 63938 | 524 | 63414 |
| 840.1 Muscle/ten    | 0.554822 | 0.97786  | 0.745853 | 0.04339  | 63647 | 81  | 63566 |
| 8.52 Intestinal ir  | 0.98541  | 1.400623 | 1.199284 | 0.043653 | 72036 | 95  | 71941 |
| 180.1 Cervical car  | 0.993927 | 1.29976  | 1.148495 | 0.043817 | 61607 | 186 | 61421 |
| 871.3 Open woun     | 0.617046 | 0.983953 | 0.786084 | 0.043855 | 68819 | 130 | 68689 |
| 728.1 Muscular ca   | 0.949799 | 1.611006 | 1.308393 | 0.044034 | 58913 | 26  | 58887 |
| 305.2 Eating disor  | 0.999105 | 1.206718 | 1.101875 | 0.044305 | 49369 | 577 | 48792 |
| 696.41 Psoriasis vu | 0.999397 | 1.163721 | 1.081301 | 0.044345 | 62355 | 722 | 61633 |
| 300.13 Phobia       | 0.959019 | 1.539864 | 1.272578 | 0.044509 | 48831 | 39  | 48792 |
| 362.26 Macular pu   | 0.734874 | 0.991097 | 0.857661 | 0.044707 | 68513 | 248 | 68265 |
| 365.2 Primary an    | 0.716204 | 0.990894 | 0.847085 | 0.045629 | 68645 | 210 | 68435 |
| 755.61 Congenital   | 0.35693  | 0.963922 | 0.601545 | 0.046034 | 72112 | 39  | 72073 |
| 189.4 Malignant r   | 0.978227 | 1.425798 | 1.211513 | 0.046161 | 72666 | 72  | 72594 |
| 801.1 Fracture of   | 0.825451 | 0.996543 | 0.908842 | 0.046912 | 67191 | 664 | 66527 |
| 727.6 Rupture of    | 0.773357 | 0.994217 | 0.880226 | 0.046933 | 59222 | 335 | 58887 |
| 695.41 Cutaneous    | 0.665912 | 0.989974 | 0.81789  | 0.047565 | 63293 | 158 | 63135 |
| 728 Disorders o     | 0.743945 | 0.993617 | 0.863755 | 0.047734 | 59161 | 274 | 58887 |
| 447 Other disor     | 0.995682 | 1.226887 | 1.111412 | 0.047772 | 69746 | 328 | 69418 |
| 353 Nerve root      | 0.778929 | 0.995244 | 0.883433 | 0.047802 | 66990 | 396 | 66594 |
| 159.4 Malignant r   | 0.946394 | 1.577107 | 1.29018  | 0.047821 | 70806 | 29  | 70777 |
| 620.1 Dysplasia o   | 0.286704 | 0.957178 | 0.54228  | 0.047967 | 71190 | 26  | 71164 |
| 575.1 Cholangitis   | 0.952748 | 1.57726  | 1.288505 | 0.048256 | 70413 | 36  | 70377 |
| 870.4 Open woun     | 0.479363 | 0.978944 | 0.696923 | 0.048593 | 68750 | 61  | 68689 |
| 153 Colorectal c    | 0.996239 | 1.206054 | 1.101002 | 0.048745 | 67505 | 390 | 67115 |
| 275.6 Hypercalce    | 0.822218 | 0.997232 | 0.907574 | 0.04911  | 71494 | 576 | 70918 |
| 353.2 Nerve root    | 0.741936 | 0.994746 | 0.863029 | 0.049407 | 66871 | 277 | 66594 |
| 803.1 Fracture of   | 0.995404 | 1.217214 | 1.106151 | 0.049731 | 66894 | 367 | 66527 |
| 209 Neuroendo       | 0.944026 | 1.570658 | 1.284911 | 0.05108  | 73184 | 30  | 73154 |
| 960.2 Allergy/adv   | 0.990159 | 1.302324 | 1.146558 | 0.051411 | 68799 | 202 | 68597 |

|        |               |          |          |          |          |       |      |       |
|--------|---------------|----------|----------|----------|----------|-------|------|-------|
| 426.32 | Left bundle   | 0.990168 | 1.278064 | 1.134435 | 0.053212 | 59087 | 208  | 58879 |
| 592.2  | Urethritis a  | 0.471923 | 0.985611 | 0.694414 | 0.053453 | 56712 | 57   | 56655 |
| 636.2  | Early onset   | 0.995998 | 1.191679 | 1.092465 | 0.053529 | 67955 | 622  | 67333 |
| 771.1  | Swelling of   | 0.998037 | 1.111904 | 1.054497 | 0.054265 | 71058 | 1552 | 69506 |
| 474.2  | Chronic ton   | 0.81518  | 1.000113 | 0.904949 | 0.05577  | 54423 | 621  | 53802 |
| 528.12 | Oral aphtha   | 0.584366 | 0.994347 | 0.770768 | 0.0558   | 70744 | 102  | 70642 |
| 550.1  | Inguinal hei  | 0.614768 | 0.995134 | 0.789921 | 0.055849 | 69839 | 113  | 69726 |
| 853    | Complicatio   | 0.935895 | 1.580606 | 1.288029 | 0.055996 | 70895 | 31   | 70864 |
| 346.2  | Nonspecific   | 0.965854 | 1.477468 | 1.230692 | 0.056472 | 63700 | 63   | 63637 |
| 614.32 | Chronic infl  | 0.642162 | 0.997182 | 0.806792 | 0.056536 | 65609 | 138  | 65471 |
| 394.4  | Acute rheu    | 0.928682 | 1.626092 | 1.309685 | 0.056566 | 68661 | 25   | 68636 |
| 367.9  | Blindness a   | 0.992421 | 1.216165 | 1.104023 | 0.056884 | 68351 | 357  | 67994 |
| 752.11 | Spina bifida  | 0.958735 | 1.522035 | 1.252316 | 0.057997 | 72478 | 59   | 72419 |
| 433.5  | Cerebral an   | 0.990548 | 1.237804 | 1.113743 | 0.058612 | 68690 | 303  | 68387 |
| 130    | Spirochetal   | 0.400774 | 0.989701 | 0.645279 | 0.058962 | 72030 | 41   | 71989 |
| 275.11 | Hereditary    | 0.51599  | 0.996516 | 0.728376 | 0.06038  | 70987 | 69   | 70918 |
| 385    | Other disor   | 0.686822 | 1.001116 | 0.834869 | 0.061213 | 64471 | 185  | 64286 |
| 473.3  | Paralysis/sp  | 0.709595 | 1.00139  | 0.848345 | 0.062014 | 53993 | 191  | 53802 |
| 681.6  | Cellulitis an | 0.981204 | 1.321021 | 1.152765 | 0.062115 | 65955 | 147  | 65808 |
| 772.4  | Rhabdomyo     | 0.95892  | 1.489408 | 1.234566 | 0.062225 | 68221 | 56   | 68165 |
| 695.7  | Prurigo and   | 0.726855 | 1.002288 | 0.858249 | 0.0629   | 64648 | 224  | 64424 |
| 290.3  | Other persi   | 0.991737 | 1.190016 | 1.090356 | 0.062986 | 67366 | 438  | 66928 |
| 751.21 | Cystic kidn   | 0.762391 | 1.002896 | 0.877907 | 0.063151 | 72082 | 322  | 71760 |
| 966    | Poisoning b   | 0.971145 | 1.411285 | 1.195271 | 0.063232 | 68694 | 97   | 68597 |
| 444.2  | Embolism a    | 0.911572 | 1.631967 | 1.309955 | 0.063248 | 69438 | 20   | 69418 |
| 695.4  | Lupus (loca   | 0.994518 | 1.142621 | 1.068018 | 0.063354 | 64025 | 890  | 63135 |
| 323.8  | Encephaliti   | 0.516761 | 1.000529 | 0.730401 | 0.063666 | 72739 | 69   | 72670 |
| 740    | Osteoarthr    | 0.950021 | 1.001297 | 0.975446 | 0.063736 | 70675 | 9168 | 61507 |
| 530.11 | GERD          | 0.998336 | 1.051305 | 1.024631 | 0.06502  | 66312 | 8268 | 58044 |
| 426.7  | Abnormal e    | 0.845073 | 1.003415 | 0.922494 | 0.065824 | 59641 | 762  | 58879 |
| 729    | Other disor   | 0.786343 | 1.00391  | 0.891654 | 0.066211 | 59275 | 388  | 58887 |
| 364.4  | Corneal de    | 0.631884 | 1.004165 | 0.804271 | 0.066299 | 68552 | 117  | 68435 |
| 427.41 | Ventricular   | 0.951494 | 1.47983  | 1.229704 | 0.067191 | 58932 | 53   | 58879 |

|                    |          |          |          |          |       |      |       |
|--------------------|----------|----------|----------|----------|-------|------|-------|
| 709.5 Dermatomy    | 0.972832 | 1.34804  | 1.165067 | 0.067444 | 63528 | 114  | 63414 |
| 798.1 Chronic fati | 0.822527 | 1.004257 | 0.911142 | 0.068001 | 47533 | 567  | 46966 |
| 743.13 Other speci | 0.850301 | 1.003858 | 0.925653 | 0.068396 | 64515 | 753  | 63762 |
| 281.1 Megaloblas   | 0.826008 | 1.004735 | 0.912949 | 0.068658 | 67286 | 617  | 66669 |
| 713.5 Arthropath   | 0.937741 | 1.539763 | 1.257936 | 0.068789 | 64799 | 32   | 64767 |
| 306.1 Mental disc  | 0.988878 | 1.213845 | 1.099871 | 0.069135 | 49285 | 493  | 48792 |
| 722.8 Postlamine   | 0.72774  | 1.006089 | 0.86048  | 0.069674 | 62861 | 229  | 62632 |
| 818.1 Subdural h   | 0.972504 | 1.343882 | 1.162027 | 0.06992  | 71426 | 118  | 71308 |
| 575.6 Cholesterol  | 0.508574 | 1.008142 | 0.727843 | 0.070171 | 70442 | 65   | 70377 |
| 715.2 Ankylosing   | 0.970605 | 1.355002 | 1.167199 | 0.070727 | 64961 | 120  | 64841 |
| 949 Allergies, o   | 0.814534 | 1.005562 | 0.907362 | 0.070826 | 62817 | 523  | 62294 |
| 364 Corneal opa    | 0.79584  | 1.005735 | 0.897636 | 0.071015 | 68837 | 402  | 68435 |
| 588.1 Renal osteo  | 0.960839 | 1.408913 | 1.193103 | 0.071889 | 68650 | 78   | 68572 |
| 358.1 Myasthenia   | 0.958806 | 1.424512 | 1.200207 | 0.072141 | 70501 | 71   | 70430 |
| 350.2 Abnormalit   | 0.862793 | 1.004954 | 0.932593 | 0.073105 | 70319 | 907  | 69412 |
| 350.6 Disturbanc   | 0.622423 | 1.00929  | 0.800967 | 0.073158 | 69523 | 111  | 69412 |
| 577 Diseases of    | 0.989062 | 1.181397 | 1.084673 | 0.073425 | 73020 | 518  | 72502 |
| 696.3 Pityriasis   | 0.443239 | 1.013222 | 0.685086 | 0.074501 | 64467 | 43   | 64424 |
| 700 Corns and c    | 0.753695 | 1.008682 | 0.876066 | 0.075757 | 68317 | 256  | 68061 |
| 578.1 Hemateme     | 0.970931 | 1.364713 | 1.167908 | 0.075817 | 64033 | 126  | 63907 |
| 31 Diseases du     | 0.913375 | 1.580611 | 1.277972 | 0.076602 | 71109 | 27   | 71082 |
| 378.1 Strabismus   | 0.739493 | 1.009654 | 0.868511 | 0.076655 | 65396 | 254  | 65142 |
| 735.1 Flat foot    | 0.717294 | 1.010161 | 0.856423 | 0.076754 | 67357 | 194  | 67163 |
| 426.3 Bundle brai  | 0.98475  | 1.218478 | 1.101081 | 0.076867 | 59213 | 334  | 58879 |
| 655.1 Abnormalit   | 0.895619 | 1.005329 | 0.949542 | 0.079078 | 69991 | 2055 | 67936 |
| 530.1 Esophagitis  | 0.997118 | 1.048726 | 1.022738 | 0.080692 | 66849 | 8805 | 58044 |
| 346 Abnormal f     | 0.957834 | 1.417396 | 1.191841 | 0.080912 | 63721 | 84   | 63637 |
| 750.1 Upper gastr  | 0.533743 | 1.01832  | 0.749156 | 0.081349 | 71828 | 68   | 71760 |
| 942 Infusion an    | 0.924829 | 1.532705 | 1.251025 | 0.081612 | 62329 | 35   | 62294 |
| 364.51 Fuchs' dyst | 0.628979 | 1.014538 | 0.807847 | 0.081762 | 68539 | 104  | 68435 |
| 277.4 Disorders o  | 0.457098 | 1.025419 | 0.699815 | 0.085299 | 71810 | 47   | 71763 |
| 691 Congenital     | 0.725252 | 1.014283 | 0.862772 | 0.08539  | 64646 | 222  | 64424 |
| 855 Complicatic    | 0.976168 | 1.267079 | 1.121648 | 0.085757 | 71100 | 236  | 70864 |

|                     |          |          |          |          |       |       |       |
|---------------------|----------|----------|----------|----------|-------|-------|-------|
| 737 Curvature c     | 0.863563 | 1.008103 | 0.934447 | 0.086163 | 68125 | 962   | 67163 |
| 618.5 Prolapse of   | 0.761105 | 1.012711 | 0.882206 | 0.086209 | 71684 | 274   | 71410 |
| 512 Other symp      | 0.963403 | 1.002448 | 0.982785 | 0.086626 | 67359 | 18057 | 49302 |
| 496.3 Bronchiect    | 0.976627 | 1.25526  | 1.116003 | 0.087517 | 63367 | 234   | 63133 |
| 560.4 Other intes   | 0.983024 | 1.199447 | 1.090742 | 0.087649 | 61009 | 388   | 60621 |
| 245.1 Thyroiditis,  | 0.542777 | 1.025005 | 0.757414 | 0.088359 | 58540 | 74    | 58466 |
| 653 Problems a      | 0.989986 | 1.132078 | 1.06     | 0.088704 | 72153 | 1244  | 70909 |
| 500 Lung diseas     | 0.934832 | 1.507085 | 1.232031 | 0.089121 | 68278 | 50    | 68228 |
| 259.1 Nonspecific   | 0.755958 | 1.015037 | 0.880012 | 0.089817 | 67286 | 291   | 66995 |
| 530.5 Disorders o   | 0.971229 | 1.277659 | 1.126183 | 0.090499 | 58223 | 179   | 58044 |
| 557.1 Celiac disea  | 0.708388 | 1.018354 | 0.854769 | 0.091031 | 60831 | 210   | 60621 |
| 426.8 Other cardi   | 0.94783  | 1.418524 | 1.191057 | 0.091232 | 58953 | 74    | 58879 |
| 703.1 Ingrowing r   | 0.774499 | 1.014697 | 0.890192 | 0.092092 | 68152 | 311   | 67841 |
| 726.4 Calcaneal s   | 0.847803 | 1.010319 | 0.927416 | 0.092437 | 59553 | 666   | 58887 |
| 751.22 Other speci  | 0.946253 | 1.434865 | 1.197133 | 0.092866 | 71833 | 73    | 71760 |
| 701.5 Abnormal g    | 0.638656 | 1.022758 | 0.816516 | 0.092909 | 68178 | 117   | 68061 |
| 528.3 Cellulitis an | 0.533909 | 1.030151 | 0.753912 | 0.093733 | 70706 | 64    | 70642 |
| 506 Empyema a       | 0.978867 | 1.224935 | 1.100799 | 0.094097 | 68582 | 354   | 68228 |
| 800.4 Fracture of   | 0.711909 | 1.020429 | 0.85803  | 0.096513 | 66716 | 189   | 66527 |
| 380 Disorders o     | 0.619509 | 1.027167 | 0.806943 | 0.097872 | 69341 | 101   | 69240 |
| 695.22 Pemphigus    | 0.914563 | 1.51866  | 1.236976 | 0.098426 | 64456 | 32    | 64424 |
| 189.2 Cancer of b   | 0.964671 | 1.30043  | 1.134393 | 0.099096 | 72737 | 143   | 72594 |
| 532 Dysphagia       | 0.916329 | 1.00694  | 0.961168 | 0.099755 | 60433 | 2389  | 58044 |
| 426.4 Anomalous     | 0.560835 | 1.034541 | 0.772507 | 0.100063 | 58959 | 80    | 58879 |
| 701.6 Acquired ac   | 0.96481  | 1.342728 | 1.149241 | 0.100167 | 68199 | 138   | 68061 |
| 303.1 Dissociative  | 0.919633 | 1.517148 | 1.234756 | 0.100449 | 48835 | 43    | 48792 |
| 371.9 Chronic infl  | 0.907012 | 1.568016 | 1.258784 | 0.100572 | 63585 | 33    | 63552 |
| 271.3 Intestinal d  | 0.928366 | 1.481751 | 1.217617 | 0.101078 | 73085 | 50    | 73035 |
| 327.5 Parasomnia    | 0.569845 | 1.034052 | 0.779337 | 0.103005 | 61790 | 77    | 61713 |
| 198.7 Secondary i   | 0.944022 | 1.397714 | 1.177627 | 0.104009 | 67694 | 76    | 67618 |
| 38.1 Gram negat     | 0.886046 | 1.581811 | 1.268259 | 0.104715 | 71108 | 26    | 71082 |
| 442 Other aneu      | 0.979416 | 1.187672 | 1.083136 | 0.105003 | 69836 | 418   | 69418 |
| 803.2 Fracture of   | 0.86949  | 1.012009 | 0.939436 | 0.106919 | 67512 | 985   | 66527 |



|                     |          |          |          |          |       |      |       |
|---------------------|----------|----------|----------|----------|-------|------|-------|
| 620 Dysplasia o     | 0.679388 | 1.028131 | 0.84287  | 0.107167 | 71313 | 149  | 71164 |
| 740.1 Osteoarthri   | 0.934369 | 1.006288 | 0.970003 | 0.107403 | 65435 | 3928 | 61507 |
| 782.6 Pallor and f  | 0.735525 | 1.023847 | 0.872784 | 0.107817 | 67418 | 234  | 67184 |
| 145.3 Cancer of n   | 0.364373 | 1.058309 | 0.643347 | 0.108249 | 72513 | 27   | 72486 |
| 743.21 Pathologic i | 0.95951  | 1.30117  | 1.132664 | 0.109734 | 63887 | 125  | 63762 |
| 291.4 Specific nor  | 0.738537 | 1.02515  | 0.874846 | 0.110858 | 67171 | 243  | 66928 |
| 716.9 Arthropath    | 0.989971 | 1.092862 | 1.041041 | 0.110882 | 66615 | 1848 | 64767 |
| 383 Otosclerosi     | 0.474942 | 1.049211 | 0.722776 | 0.111152 | 64332 | 46   | 64286 |
| 225 Benign neo      | 0.790983 | 1.020149 | 0.90173  | 0.111726 | 72363 | 367  | 71996 |
| 871.1 Open woun     | 0.766103 | 1.022797 | 0.889231 | 0.112068 | 68986 | 297  | 68689 |
| 270.32 Paraproteir  | 0.968636 | 1.244963 | 1.10692  | 0.113649 | 71995 | 220  | 71775 |
| 577.1 Acute panc    | 0.967192 | 1.258519 | 1.112247 | 0.114685 | 72730 | 228  | 72502 |
| 613.1 Inflammato    | 0.77559  | 1.023387 | 0.894825 | 0.116928 | 68451 | 301  | 68150 |
| 368.2 Diplopia an   | 0.802638 | 1.020897 | 0.908404 | 0.118143 | 69730 | 398  | 69332 |
| 189.21 Malignant r  | 0.957347 | 1.298463 | 1.12962  | 0.118375 | 72733 | 139  | 72594 |
| 441.2 Chronic vas   | 0.89821  | 1.520613 | 1.232564 | 0.119401 | 69453 | 35   | 69418 |
| 733.6 Costochondr   | 0.721111 | 1.030669 | 0.867494 | 0.119645 | 65574 | 195  | 65379 |
| 226 Benign neo      | 0.776565 | 1.024301 | 0.895776 | 0.120006 | 71680 | 309  | 71371 |
| 270 Disorders o     | 0.976786 | 1.181366 | 1.078456 | 0.120144 | 72222 | 447  | 71775 |
| 112 Candidiasis     | 0.894675 | 1.012019 | 0.952437 | 0.121263 | 67815 | 1452 | 66363 |
| 737.3 Kyphoscolic   | 0.858907 | 1.015866 | 0.935758 | 0.121298 | 67981 | 818  | 67163 |
| 190 Cancer of e     | 0.926132 | 1.433859 | 1.189665 | 0.121667 | 72054 | 58   | 71996 |
| 818 Intracranial    | 0.967345 | 1.239459 | 1.103129 | 0.121897 | 71561 | 253  | 71308 |
| 333.4 Torsion dys   | 0.761219 | 1.02682  | 0.888434 | 0.12216  | 63898 | 261  | 63637 |
| 204.4 Multiple m    | 0.948399 | 1.341949 | 1.14647  | 0.125093 | 71854 | 114  | 71740 |
| 963.1 Antineoplas   | 0.946301 | 1.345451 | 1.148188 | 0.126355 | 68712 | 115  | 68597 |
| 427.61 Supraventri  | 0.648344 | 1.04142  | 0.830534 | 0.126469 | 58991 | 112  | 58879 |
| 350.3 Lack of coo   | 0.859543 | 1.016885 | 0.936625 | 0.127194 | 70205 | 793  | 69412 |
| 286.12 Congenital   | 0.913392 | 1.504615 | 1.217187 | 0.127684 | 68427 | 58   | 68369 |
| 300.11 Generalizec  | 0.893606 | 1.013099 | 0.952495 | 0.128686 | 50286 | 1494 | 48792 |
| 729.3 Panniculitis  | 0.925265 | 1.418907 | 1.181187 | 0.129194 | 58947 | 60   | 58887 |
| 149.1 Cancer of o   | 0.415406 | 1.075634 | 0.689942 | 0.130098 | 72517 | 31   | 72486 |
| 618.6 Vaginal ent   | 0.76121  | 1.029224 | 0.890041 | 0.131237 | 71655 | 245  | 71410 |

|        |              |          |          |          |          |       |      |       |
|--------|--------------|----------|----------|----------|----------|-------|------|-------|
| 70.2   | Viral hepati | 0.956213 | 1.300291 | 1.126162 | 0.131441 | 63289 | 167  | 63122 |
| 752.1  | Neural tube  | 0.935365 | 1.393127 | 1.16728  | 0.131526 | 72514 | 95   | 72419 |
| 290    | Delirium de  | 0.982867 | 1.125573 | 1.053514 | 0.131747 | 67840 | 912  | 66928 |
| 327.72 | Sleep relate | 0.553852 | 1.055729 | 0.778998 | 0.132045 | 61773 | 60   | 61713 |
| 433.12 | Cerebral at  | 0.963188 | 1.246198 | 1.104222 | 0.13208  | 68587 | 200  | 68387 |
| 429.3  | Symptoms i   | 0.846347 | 1.020019 | 0.931023 | 0.133784 | 69192 | 667  | 68525 |
| 264    | Lack of nor  | 0.691736 | 1.041747 | 0.854962 | 0.134593 | 62176 | 180  | 61996 |
| 757    | Congenital   | 0.417183 | 1.083478 | 0.693214 | 0.135595 | 72248 | 33   | 72215 |
| 8.6    | Viral Enteri | 0.710277 | 1.038921 | 0.864886 | 0.135649 | 72123 | 182  | 71941 |
| 805    | Fracture of  | 0.979927 | 1.137712 | 1.05825  | 0.137505 | 67300 | 773  | 66527 |
| 526.8  | Exostosis of | 0.859141 | 1.612309 | 1.267446 | 0.13796  | 68349 | 21   | 68328 |
| 204.11 | Lymphoid li  | 0.479651 | 1.077729 | 0.73552  | 0.139583 | 71788 | 48   | 71740 |
| 361    | Retinal deta | 0.765619 | 1.032128 | 0.893678 | 0.141227 | 68680 | 245  | 68435 |
| 8.5    | Bacterial er | 0.942293 | 1.336398 | 1.141077 | 0.141547 | 72059 | 118  | 71941 |
| 277.5  | Other disor  | 0.94365  | 1.329348 | 1.138112 | 0.141588 | 71884 | 121  | 71763 |
| 427.6  | Premature    | 0.845445 | 1.02155  | 0.931432 | 0.14163  | 59508 | 629  | 58879 |
| 323    | Encephaliti  | 0.619347 | 1.054258 | 0.81845  | 0.14195  | 72766 | 96   | 72670 |
| 292.1  | Aphasia/sp   | 0.977553 | 1.14865  | 1.062352 | 0.142011 | 67583 | 655  | 66928 |
| 754    | Congenital   | 0.752518 | 1.034688 | 0.887517 | 0.143036 | 72301 | 228  | 72073 |
| 196    | Radiothera   | 0.74961  | 1.035345 | 0.88623  | 0.143886 | 67841 | 223  | 67618 |
| 250.15 | Diabetes ty  | 0.327163 | 1.110953 | 0.630971 | 0.144764 | 62178 | 20   | 62158 |
| 717    | Polymyalgia  | 0.962171 | 1.228275 | 1.095137 | 0.145514 | 72957 | 238  | 72719 |
| 755.6  | Other cong   | 0.504445 | 1.077712 | 0.753062 | 0.145876 | 72128 | 55   | 72073 |
| 250.4  | Abnormal g   | 0.92262  | 1.011375 | 0.966506 | 0.146047 | 64808 | 2650 | 62158 |
| 536.7  | Complicatio  | 0.886665 | 1.536887 | 1.228886 | 0.146131 | 68127 | 39   | 68088 |
| 952    | Spinal cord  | 0.870806 | 1.569999 | 1.245368 | 0.146519 | 73148 | 30   | 73118 |
| 172.11 | Melanomas    | 0.81796  | 1.026416 | 0.919427 | 0.147698 | 66226 | 432  | 65794 |
| 71     | Human imm    | 0.962394 | 1.236842 | 1.097271 | 0.147905 | 63367 | 245  | 63122 |
| 352.2  | Facial nerve | 0.959436 | 1.241224 | 1.100036 | 0.148171 | 66824 | 230  | 66594 |
| 716    | Other arthr  | 0.986717 | 1.085471 | 1.035727 | 0.149194 | 66792 | 2025 | 64767 |
| 574.1  | Cholelithias | 0.983784 | 1.102965 | 1.042837 | 0.150666 | 71857 | 1480 | 70377 |
| 290.12 | Dementia v   | 0.512744 | 1.077124 | 0.760832 | 0.152873 | 66972 | 44   | 66928 |
| 452.1  | Iatrogenic p | 0.854656 | 1.588944 | 1.25315  | 0.153894 | 65747 | 24   | 65723 |

|        |               |          |          |          |          |       |      |       |
|--------|---------------|----------|----------|----------|----------|-------|------|-------|
| 272.12 | Hyperglyce    | 0.785611 | 1.032702 | 0.905249 | 0.154653 | 55191 | 279  | 54912 |
| 275.1  | Disorders o   | 0.718173 | 1.045264 | 0.872986 | 0.157558 | 71096 | 178  | 70918 |
| 514.1  | Abnormal r    | 0.892744 | 1.473581 | 1.197531 | 0.161753 | 71299 | 44   | 71255 |
| 474.1  | Acute tonsi   | 0.757745 | 1.040807 | 0.892722 | 0.162115 | 54072 | 270  | 53802 |
| 281    | Other defec   | 0.85248  | 1.024582 | 0.936474 | 0.162238 | 67346 | 677  | 66669 |
| 110.2  | Dermatomy     | 0.645425 | 1.060663 | 0.837051 | 0.162362 | 66463 | 100  | 66363 |
| 41.11  | Methicillin   | 0.928057 | 1.372047 | 1.150671 | 0.163238 | 71182 | 100  | 71082 |
| 800.1  | Fracture of   | 0.951396 | 1.258968 | 1.105077 | 0.163801 | 66713 | 186  | 66527 |
| 687    | Symptoms      | 0.48184  | 1.093447 | 0.745564 | 0.164095 | 60293 | 42   | 60251 |
| 686.1  | Carbuncle a   | 0.792841 | 1.035474 | 0.909821 | 0.166157 | 66133 | 325  | 65808 |
| 261.41 | Rickets or c  | 0.922358 | 1.377313 | 1.15339  | 0.166484 | 62078 | 82   | 61996 |
| 8      | Intestinal ir | 0.818485 | 1.031273 | 0.921592 | 0.166705 | 72389 | 448  | 71941 |
| 574.2  | Calculus of   | 0.949515 | 1.264006 | 1.105864 | 0.170023 | 70571 | 194  | 70377 |
| 574    | Cholelithias  | 0.98357  | 1.091426 | 1.037029 | 0.170918 | 72182 | 1805 | 70377 |
| 300.12 | Agorophob     | 0.976111 | 1.130353 | 1.05251  | 0.171898 | 49708 | 916  | 48792 |
| 401.21 | Hypertensiv   | 0.900319 | 1.017762 | 0.958206 | 0.172281 | 52181 | 1374 | 50807 |
| 755    | Congenital    | 0.730551 | 1.048971 | 0.881481 | 0.173075 | 72264 | 191  | 72073 |
| 150    | Cancer of e   | 0.363671 | 1.1314   | 0.670462 | 0.173077 | 70799 | 22   | 70777 |
| 681    | Superficial c | 0.987392 | 1.069503 | 1.028124 | 0.173568 | 68909 | 3101 | 65808 |
| 526.9  | Jaw disease   | 0.647665 | 1.065556 | 0.840621 | 0.173736 | 68430 | 102  | 68328 |
| 225.2  | Benign neo    | 0.409603 | 1.121589 | 0.702312 | 0.173934 | 72027 | 31   | 71996 |
| 818.2  | Subarachnc    | 0.936328 | 1.312493 | 1.125058 | 0.174353 | 71440 | 132  | 71308 |
| 253.7  | Other disor   | 0.85286  | 1.544948 | 1.22748  | 0.175132 | 67021 | 26   | 66995 |
| 362.23 | Cystoid ma    | 0.789018 | 1.038008 | 0.909456 | 0.176076 | 68536 | 271  | 68265 |
| 334.21 | Amyotroph     | 0.524681 | 1.093522 | 0.77467  | 0.17665  | 63688 | 51   | 63637 |
| 783    | Fever of un   | 0.932421 | 1.012529 | 0.972065 | 0.177911 | 70942 | 3428 | 67514 |
| 751    | Genitourina   | 0.851877 | 1.027526 | 0.937591 | 0.178296 | 72438 | 678  | 71760 |
| 756.1  | Congenital    | 0.839357 | 1.595975 | 1.247998 | 0.178422 | 72097 | 24   | 72073 |
| 733.2  | Cyst of bon   | 0.662967 | 1.063887 | 0.849572 | 0.178902 | 65488 | 109  | 65379 |
| 389.5  | Disorders o   | 0.378038 | 1.137239 | 0.682983 | 0.179607 | 67585 | 25   | 67560 |
| 528.11 | Stomatitis a  | 0.552225 | 1.089433 | 0.791051 | 0.179672 | 70703 | 61   | 70642 |
| 433.31 | Transient cr  | 0.980072 | 1.104656 | 1.041766 | 0.18024  | 69631 | 1244 | 68387 |
| 441    | Vascular ins  | 0.934899 | 1.305437 | 1.12145  | 0.181245 | 69549 | 131  | 69418 |

|        |               |          |          |          |          |       |       |       |
|--------|---------------|----------|----------|----------|----------|-------|-------|-------|
| 225.1  | Benign neo    | 0.795261 | 1.039109 | 0.913056 | 0.183516 | 72321 | 325   | 71996 |
| 371.1  | Uveitis, nor  | 0.963136 | 1.183652 | 1.072589 | 0.183661 | 63921 | 369   | 63552 |
| 41.2   | Streptococ    | 0.928604 | 1.33663  | 1.132115 | 0.185349 | 71208 | 126   | 71082 |
| 447.7  | Aortic ecta   | 0.925257 | 1.331121 | 1.131594 | 0.18558  | 69519 | 101   | 69418 |
| 287.2  | Allergic pur  | 0.810217 | 1.655017 | 1.273351 | 0.185733 | 68389 | 20    | 68369 |
| 536    | Disorders o   | 0.903176 | 1.018897 | 0.960221 | 0.187085 | 69617 | 1529  | 68088 |
| 807    | Fracture of   | 0.965526 | 1.169634 | 1.066704 | 0.187706 | 67002 | 475   | 66527 |
| 263    | Other nutri   | 0.685452 | 1.063608 | 0.862369 | 0.188368 | 62123 | 127   | 61996 |
| 293.1  | Swelling, m   | 0.896039 | 1.020562 | 0.95737  | 0.189654 | 71401 | 1284  | 70117 |
| 202.2  | Non-Hodgk     | 0.823424 | 1.035242 | 0.926156 | 0.189702 | 72175 | 435   | 71740 |
| 613.9  | Breast diso   | 0.692593 | 1.06206  | 0.866245 | 0.190103 | 68277 | 127   | 68150 |
| 130.1  | Lyme disea    | 0.418825 | 1.136819 | 0.715083 | 0.193207 | 72021 | 32    | 71989 |
| 427    | Cardiac dys   | 0.960495 | 1.00803  | 0.984096 | 0.193232 | 69407 | 10528 | 58879 |
| 250.14 | Type 1 diab   | 0.938391 | 1.281604 | 1.109407 | 0.194092 | 62314 | 156   | 62158 |
| 655    | Known or s    | 0.933391 | 1.01374  | 0.973065 | 0.194962 | 72062 | 4126  | 67936 |
| 425.12 | Other hype    | 0.511104 | 1.109901 | 0.772032 | 0.195079 | 71950 | 43    | 71907 |
| 856    | Vascular co   | 0.891504 | 1.432687 | 1.171564 | 0.195264 | 70919 | 55    | 70864 |
| 713    | Arthropath    | 0.905146 | 1.391871 | 1.153856 | 0.196223 | 64832 | 65    | 64767 |
| 364.41 | Keratoconu    | 0.554615 | 1.09887  | 0.797059 | 0.196874 | 68487 | 52    | 68435 |
| 289.5  | Diseases of   | 0.917468 | 1.363138 | 1.140592 | 0.197209 | 65954 | 96    | 65858 |
| 202.24 | Large cell ly | 0.492853 | 1.117813 | 0.762016 | 0.197585 | 71781 | 41    | 71740 |
| 736.6  | Unequal leg   | 0.572356 | 1.094176 | 0.806763 | 0.197618 | 67227 | 64    | 67163 |
| 287.4  | Qualitative   | 0.520076 | 1.112117 | 0.777564 | 0.197941 | 68421 | 52    | 68369 |
| 396    | Abnormal h    | 0.879405 | 1.025152 | 0.950913 | 0.198592 | 69569 | 933   | 68636 |
| 781.2  | Abnormal p    | 0.680498 | 1.069273 | 0.861724 | 0.198723 | 71791 | 124   | 71667 |
| 286.1  | Congenital    | 0.919745 | 1.358996 | 1.137681 | 0.199603 | 68489 | 120   | 68369 |
| 656    | Other perin   | 0.893819 | 1.461268 | 1.175224 | 0.203213 | 73083 | 70    | 73013 |
| 149.5  | Hx of malig   | 0.547458 | 1.103948 | 0.794959 | 0.203974 | 72538 | 52    | 72486 |
| 246.2  | Thyroid cys   | 0.631843 | 1.083379 | 0.839003 | 0.204545 | 58553 | 87    | 58466 |
| 306.9  | Tension hea   | 0.72936  | 1.05972  | 0.885886 | 0.205189 | 48965 | 173   | 48792 |
| 401.3  | Other hype    | 0.973492 | 1.12182  | 1.046878 | 0.205387 | 51632 | 825   | 50807 |
| 695.1  | Toxic eryth   | 0.435174 | 1.143576 | 0.729941 | 0.206728 | 64458 | 34    | 64424 |
| 202    | Cancer of o   | 0.836979 | 1.035731 | 0.933638 | 0.207135 | 72239 | 499   | 71740 |

|                     |          |          |          |          |       |      |       |
|---------------------|----------|----------|----------|----------|-------|------|-------|
| 249 Secondary c     | 0.891544 | 1.428001 | 1.165248 | 0.20809  | 62215 | 57   | 62158 |
| 621 Endometriā      | 0.942093 | 1.250076 | 1.095483 | 0.208407 | 71358 | 194  | 71164 |
| 724.9 Other unsp    | 0.923073 | 1.320448 | 1.122398 | 0.209231 | 62742 | 110  | 62632 |
| 41.12 Methicillin   | 0.909411 | 1.370546 | 1.141391 | 0.21101  | 71173 | 91   | 71082 |
| 456 Chronic ver     | 0.792153 | 1.046734 | 0.914889 | 0.21199  | 66005 | 282  | 65723 |
| 711 Arthropath      | 0.919502 | 1.326773 | 1.124543 | 0.213463 | 64886 | 119  | 64767 |
| 465.4 Acute laryn   | 0.739281 | 1.060056 | 0.892149 | 0.216253 | 51763 | 167  | 51596 |
| 767 Cervicocrar     | 0.435934 | 1.147691 | 0.734356 | 0.217422 | 66855 | 31   | 66824 |
| 756.21 Pectus exca  | 0.411154 | 1.161921 | 0.718511 | 0.217477 | 72103 | 30   | 72073 |
| 253 Disorders o     | 0.962263 | 1.162343 | 1.061176 | 0.218727 | 67529 | 534  | 66995 |
| 345.11 Generalizec  | 0.829116 | 1.04046  | 0.931477 | 0.221039 | 64137 | 500  | 63637 |
| 754.2 Spondylolis   | 0.741715 | 1.061562 | 0.894191 | 0.223308 | 72246 | 173  | 72073 |
| 728.2 Laxity of lig | 0.590805 | 1.104047 | 0.82229  | 0.223483 | 58960 | 73   | 58887 |
| 349 Other and t     | 0.942384 | 1.23871  | 1.0889   | 0.223781 | 63864 | 227  | 63637 |
| 643.1 Hyperemes     | 0.744082 | 1.06345  | 0.894903 | 0.223852 | 72865 | 203  | 72662 |
| 614.1 Pelvic perit  | 0.83091  | 1.0404   | 0.932576 | 0.224311 | 65939 | 468  | 65471 |
| 244.2 Acquired hy   | 0.960064 | 1.165626 | 1.062028 | 0.224927 | 58925 | 459  | 58466 |
| 671 Venous/cer      | 0.905309 | 1.382031 | 1.140896 | 0.226348 | 72907 | 101  | 72806 |
| 800.3 Fracture of   | 0.825374 | 1.042145 | 0.930606 | 0.227532 | 66946 | 419  | 66527 |
| 751.3 Obstructive   | 0.905367 | 1.368224 | 1.136875 | 0.228133 | 71856 | 96   | 71760 |
| 597.2 Urinary con   | 0.89758  | 1.377304 | 1.141259 | 0.231109 | 69779 | 75   | 69704 |
| 530.14 Reflux esop  | 0.837551 | 1.04006  | 0.93635  | 0.234722 | 58514 | 470  | 58044 |
| 362.31 Separation   | 0.503911 | 1.136339 | 0.779558 | 0.235659 | 68305 | 40   | 68265 |
| 593.1 Gross hema    | 0.794039 | 1.052085 | 0.918711 | 0.238933 | 56925 | 270  | 56655 |
| 381.9 Otorrhea      | 0.673354 | 1.086745 | 0.866223 | 0.242476 | 64392 | 106  | 64286 |
| 272.9 Unspecifec    | 0.624104 | 1.100206 | 0.843736 | 0.243937 | 54983 | 71   | 54912 |
| 350.1 Abnormal ii   | 0.876023 | 1.031855 | 0.952461 | 0.244003 | 70237 | 825  | 69412 |
| 360.2 Progressive   | 0.658486 | 1.092722 | 0.859996 | 0.246226 | 68528 | 93   | 68435 |
| 271 Disorders o     | 0.885289 | 1.402697 | 1.147376 | 0.24726  | 73099 | 64   | 73035 |
| 199 Neoplasm c      | 0.979625 | 1.079096 | 1.028946 | 0.247543 | 69720 | 2102 | 67618 |
| 750.22 Congenital   | 0.528635 | 1.137297 | 0.795907 | 0.248019 | 71808 | 48   | 71760 |
| 284 Aplastic ane    | 0.872542 | 1.449621 | 1.163848 | 0.248458 | 66727 | 58   | 66669 |
| 385.3 Cholesteatc   | 0.689194 | 1.085088 | 0.874556 | 0.249691 | 64407 | 121  | 64286 |

|                       |          |          |          |          |       |      |       |
|-----------------------|----------|----------|----------|----------|-------|------|-------|
| 201 Hodgkin's d       | 0.66725  | 1.094349 | 0.864694 | 0.251904 | 71848 | 108  | 71740 |
| 250.3 Insulin pum     | 0.966959 | 1.122791 | 1.043958 | 0.259514 | 63019 | 861  | 62158 |
| 379.1 Scleritis anc   | 0.939785 | 1.216984 | 1.077404 | 0.259977 | 65381 | 239  | 65142 |
| 626.15 Infertility, f | 0.624052 | 1.112372 | 0.846161 | 0.260347 | 51011 | 83   | 50928 |
| 555.21 Ulcerative c   | 0.925184 | 1.267826 | 1.095022 | 0.261585 | 60801 | 180  | 60621 |
| 362.21 Macular de     | 0.78822  | 1.058064 | 0.91895  | 0.261882 | 68494 | 229  | 68265 |
| 279.7 Other immu      | 0.915215 | 1.023611 | 0.968737 | 0.266214 | 70748 | 1783 | 68965 |
| 442.4 Arterial dis    | 0.59936  | 1.123177 | 0.83595  | 0.267308 | 69484 | 66   | 69418 |
| 303.4 Somatoforr      | 0.94675  | 1.186197 | 1.065233 | 0.273254 | 49156 | 364  | 48792 |
| 270.2 Disorders o     | 0.825315 | 1.553728 | 1.197538 | 0.273481 | 71809 | 34   | 71775 |
| 710 Osteomyeli        | 0.948777 | 1.177312 | 1.06222  | 0.274147 | 65131 | 364  | 64767 |
| 242.3 Exophthalr      | 0.910049 | 1.302616 | 1.105958 | 0.274741 | 58583 | 117  | 58466 |
| 577.3 Cyst and ps     | 0.704805 | 1.088582 | 0.885728 | 0.276714 | 72623 | 121  | 72502 |
| 872 Traumatic a       | 0.839795 | 1.487657 | 1.174867 | 0.27695  | 68728 | 39   | 68689 |
| 457.3 Encounter f     | 0.847674 | 1.045039 | 0.943951 | 0.28078  | 66199 | 476  | 65723 |
| 411.9 Other acute     | 0.848317 | 1.457397 | 1.162933 | 0.280884 | 67414 | 40   | 67374 |
| 316.1 Polyneurop      | 0.807067 | 1.534648 | 1.195556 | 0.281402 | 64584 | 27   | 64557 |
| 90.3 Venereal di      | 0.400711 | 1.230822 | 0.733437 | 0.284157 | 72882 | 24   | 72858 |
| 251.1 Hypoglycen      | 0.947912 | 1.177091 | 1.060809 | 0.286365 | 58302 | 421  | 57881 |
| 149.9 Cancer of o     | 0.828272 | 1.495677 | 1.176005 | 0.28822  | 72518 | 32   | 72486 |
| 189.12 Malignant r    | 0.844    | 1.454405 | 1.160514 | 0.289121 | 72633 | 39   | 72594 |
| 647 Infectious a      | 0.8142   | 1.058161 | 0.931609 | 0.290103 | 72237 | 376  | 71861 |
| 686.2 Impetigo        | 0.68797  | 1.100486 | 0.880595 | 0.291477 | 65919 | 111  | 65808 |
| 250.13 Type 1 diab    | 0.660137 | 1.11196  | 0.868829 | 0.293694 | 62250 | 92   | 62158 |
| 740.3 Osteoarthr      | 0.924611 | 1.238766 | 1.081789 | 0.294018 | 61665 | 158  | 61507 |
| 499 Cystic fibro      | 0.82599  | 1.540176 | 1.184689 | 0.295803 | 73145 | 42   | 73103 |
| 333 Extrapyram        | 0.889349 | 1.034388 | 0.9606   | 0.297298 | 64576 | 939  | 63637 |
| 771 Musculoske        | 0.954137 | 1.150489 | 1.051091 | 0.297452 | 70021 | 515  | 69506 |
| 647.3 Major puer      | 0.830631 | 1.529489 | 1.179211 | 0.298234 | 71903 | 42   | 71861 |
| 277 Other disor       | 0.904311 | 1.303368 | 1.102624 | 0.29878  | 71887 | 124  | 71763 |
| 355.1 Chronic pai     | 0.854304 | 1.045635 | 0.947888 | 0.300013 | 67115 | 521  | 66594 |
| 303.31 Gastrointes    | 0.591648 | 1.139036 | 0.839539 | 0.300128 | 48847 | 55   | 48792 |
| 441.1 Acute vascl     | 0.830163 | 1.478216 | 1.166664 | 0.302147 | 69454 | 36   | 69418 |

|        |              |          |          |          |          |       |      |       |
|--------|--------------|----------|----------|----------|----------|-------|------|-------|
| 427.11 | Paroxysmal   | 0.883012 | 1.036925 | 0.958552 | 0.302199 | 59740 | 861  | 58879 |
| 859    | Complicatic  | 0.9376   | 1.196705 | 1.066036 | 0.305919 | 71150 | 286  | 70864 |
| 300.3  | Obsessive-c  | 0.92917  | 1.224076 | 1.074927 | 0.30635  | 49053 | 261  | 48792 |
| 599.8  | Other symp   | 0.715945 | 1.09376  | 0.894747 | 0.30648  | 58865 | 126  | 58739 |
| 512.2  | Painful resp | 0.895992 | 1.033334 | 0.963464 | 0.30659  | 50385 | 1083 | 49302 |
| 754.1  | Lumbosacr    | 0.391395 | 1.247342 | 0.735352 | 0.307115 | 72097 | 24   | 72073 |
| 742.1  | Loose body   | 0.483159 | 1.190552 | 0.78789  | 0.307963 | 65244 | 33   | 65211 |
| 770    | Myalgia and  | 0.951563 | 1.015774 | 0.983421 | 0.315625 | 70758 | 5231 | 65527 |
| 560.2  | Impaction c  | 0.810781 | 1.543865 | 1.182935 | 0.316424 | 60653 | 32   | 60621 |
| 433.1  | Occlusion a  | 0.969395 | 1.095092 | 1.031645 | 0.316638 | 69571 | 1184 | 68387 |
| 980    | Encounter f  | 0.897954 | 1.305088 | 1.100825 | 0.318086 | 73068 | 113  | 72955 |
| 194    | Cancer of o  | 0.854109 | 1.418    | 1.139909 | 0.318432 | 71425 | 54   | 71371 |
| 795.81 | Elevated ca  | 0.783889 | 1.557902 | 1.193048 | 0.319832 | 72855 | 22   | 72833 |
| 962.3  | Hormones ;   | 0.795842 | 1.557683 | 1.188734 | 0.323638 | 68627 | 30   | 68597 |
| 753    | Congenital   | 0.557645 | 1.167723 | 0.828457 | 0.323709 | 72466 | 47   | 72419 |
| 312.3  | Impulse cor  | 0.871954 | 1.389559 | 1.125607 | 0.324843 | 71015 | 83   | 70932 |
| 292.5  | Transient a  | 0.784134 | 1.075195 | 0.923659 | 0.325614 | 67172 | 244  | 66928 |
| 781    | Symptoms i   | 0.931695 | 1.204409 | 1.066521 | 0.327277 | 71932 | 265  | 71667 |
| 368.3  | Anisometrc   | 0.459319 | 1.219165 | 0.781094 | 0.329259 | 69359 | 27   | 69332 |
| 619.5  | Noninflamr   | 0.785718 | 1.075095 | 0.924707 | 0.32931  | 66918 | 226  | 66692 |
| 530.13 | Barrett's es | 0.907685 | 1.260875 | 1.085094 | 0.333112 | 58183 | 139  | 58044 |
| 260.22 | Nutritional  | 0.835471 | 1.480251 | 1.152235 | 0.339168 | 62054 | 58   | 61996 |
| 223    | Benign neo   | 0.676222 | 1.119522 | 0.883483 | 0.339276 | 58655 | 87   | 58568 |
| 654    | Other and t  | 0.846599 | 1.448063 | 1.141653 | 0.339504 | 70969 | 60   | 70909 |
| 261.2  | Vitamin B-c  | 0.968127 | 1.092924 | 1.029946 | 0.340378 | 63281 | 1285 | 61996 |
| 961    | Poisoning b  | 0.503697 | 1.204969 | 0.806698 | 0.341445 | 68633 | 36   | 68597 |
| 202.23 | Lymphosar    | 0.87545  | 1.347324 | 1.111329 | 0.342409 | 71820 | 80   | 71740 |
| 170.1  | Bone cance   | 0.870289 | 1.356341 | 1.114408 | 0.344159 | 72935 | 74   | 72861 |
| 741.5  | Hemarthro:   | 0.569583 | 1.169275 | 0.838833 | 0.344217 | 65256 | 45   | 65211 |
| 172.22 | Squamous c   | 0.74299  | 1.093198 | 0.910565 | 0.34448  | 65934 | 140  | 65794 |
| 836    | Traumatic a  | 0.875944 | 1.340407 | 1.108522 | 0.347571 | 68993 | 80   | 68913 |
| 795    | Other and r  | 0.62949  | 1.146261 | 0.865184 | 0.347639 | 72903 | 70   | 72833 |
| 90     | Sexually tra | 0.733065 | 1.10255  | 0.906774 | 0.34879  | 72998 | 140  | 72858 |

|                     |          |          |          |          |       |      |       |
|---------------------|----------|----------|----------|----------|-------|------|-------|
| 290.13 Senile dem   | 0.786133 | 1.078708 | 0.92759  | 0.353218 | 67125 | 197  | 66928 |
| 362.9 Retinal ede   | 0.79136  | 1.077468 | 0.929428 | 0.354292 | 68479 | 214  | 68265 |
| 736.1 Acquired de   | 0.784043 | 1.539039 | 1.176312 | 0.354854 | 67190 | 27   | 67163 |
| 303.3 Psychogeni    | 0.754576 | 1.092649 | 0.915973 | 0.354981 | 48960 | 168  | 48792 |
| 772.1 Muscular w    | 0.6087   | 1.156461 | 0.858079 | 0.355088 | 68222 | 57   | 68165 |
| 362.8 Retinal her   | 0.860339 | 1.367449 | 1.116213 | 0.357664 | 68326 | 61   | 68265 |
| 259.4 Precocious    | 0.740267 | 1.778742 | 1.231416 | 0.359301 | 67019 | 24   | 66995 |
| 427.3 Other speci   | 0.966675 | 1.092675 | 1.029043 | 0.35996  | 60171 | 1292 | 58879 |
| 394.2 Mitral valve  | 0.875349 | 1.333451 | 1.104267 | 0.360501 | 68717 | 81   | 68636 |
| 751.2 Congenital    | 0.841684 | 1.059649 | 0.947699 | 0.361425 | 72178 | 418  | 71760 |
| 550.4 Umbilical h   | 0.93121  | 1.189901 | 1.058705 | 0.363176 | 70021 | 295  | 69726 |
| 275.51 Hypocalcen   | 0.942506 | 1.158119 | 1.049034 | 0.363438 | 71338 | 420  | 70918 |
| 614.54 Abscess or   | 0.702821 | 1.119925 | 0.898116 | 0.368727 | 65578 | 107  | 65471 |
| 259.2 Carcinoid sy  | 0.844602 | 1.389557 | 1.1225   | 0.369476 | 67050 | 55   | 66995 |
| 800 Fracture of     | 0.901823 | 1.037192 | 0.968479 | 0.369679 | 67614 | 1087 | 66527 |
| 737.1 Kyphosis (a   | 0.69671  | 1.121782 | 0.896395 | 0.371621 | 67267 | 104  | 67163 |
| 170 Cancer of b     | 0.921218 | 1.210112 | 1.064299 | 0.372563 | 73087 | 226  | 72861 |
| 686.3 Pilonidal cy  | 0.840436 | 1.435618 | 1.130665 | 0.374906 | 65871 | 63   | 65808 |
| 574.12 Cholelithias | 0.878396 | 1.047113 | 0.960996 | 0.375247 | 71115 | 738  | 70377 |
| 589 Abnormal r      | 0.847168 | 1.387366 | 1.119989 | 0.375425 | 68632 | 60   | 68572 |
| 212 Benign neo      | 0.897609 | 1.268218 | 1.0818   | 0.37599  | 73071 | 134  | 72937 |
| 756 Other cong      | 0.914858 | 1.228346 | 1.069009 | 0.377033 | 72300 | 227  | 72073 |
| 379.9 Pain, swelli  | 0.826998 | 1.067947 | 0.943923 | 0.377368 | 65456 | 314  | 65142 |
| 596 Other disor     | 0.886932 | 1.044183 | 0.964205 | 0.381844 | 70508 | 804  | 69704 |
| 530.6 Diverticulur  | 0.501096 | 1.222905 | 0.817517 | 0.38568  | 58073 | 29   | 58044 |
| 497 Bronchitis      | 0.950883 | 1.128834 | 1.038704 | 0.386226 | 63778 | 645  | 63133 |
| 528.6 Leukoplakia   | 0.49794  | 1.229273 | 0.815998 | 0.387223 | 70673 | 31   | 70642 |
| 327.71 Restless leg | 0.952821 | 1.121585 | 1.036446 | 0.390081 | 62383 | 670  | 61713 |
| 368.4 Visual field  | 0.931366 | 1.176279 | 1.052335 | 0.393094 | 69650 | 318  | 69332 |
| 229 Benign neo      | 0.730768 | 1.112974 | 0.91199  | 0.393545 | 72932 | 125  | 72807 |
| 722.7 Interverteb   | 0.757009 | 1.101324 | 0.921476 | 0.394693 | 62785 | 153  | 62632 |
| 526.5 Inflammato    | 0.596401 | 1.181906 | 0.860743 | 0.395452 | 68379 | 51   | 68328 |
| 691.3 Congenital    | 0.547292 | 1.206195 | 0.840457 | 0.396544 | 64465 | 41   | 64424 |



|                     |          |          |          |          |       |      |       |
|---------------------|----------|----------|----------|----------|-------|------|-------|
| 654.1 Abnormalit    | 0.918597 | 1.212326 | 1.061866 | 0.397774 | 71162 | 253  | 70909 |
| 379.3 Aphakia an    | 0.829731 | 1.407987 | 1.122191 | 0.399518 | 65188 | 46   | 65142 |
| 580.14 Chronic glo  | 0.768694 | 1.545452 | 1.166816 | 0.399596 | 68600 | 28   | 68572 |
| 624.1 Dystrophy c   | 0.607236 | 1.175268 | 0.866378 | 0.400416 | 63939 | 50   | 63889 |
| 381.3 Mastoiditis   | 0.682997 | 1.138896 | 0.895417 | 0.40068  | 64377 | 91   | 64286 |
| 264.2 Failure to tl | 0.418364 | 1.312131 | 0.77962  | 0.401332 | 62020 | 24   | 61996 |
| 586.1 Anatomical    | 0.55969  | 1.213004 | 0.846754 | 0.404913 | 68622 | 50   | 68572 |
| 53.1 Herpes zost    | 0.676039 | 1.142265 | 0.894372 | 0.408625 | 63196 | 74   | 63122 |
| 527 Diseases of     | 0.825467 | 1.07388  | 0.946053 | 0.409895 | 70948 | 306  | 70642 |
| 346.3 Nonspecific   | 0.822403 | 1.435924 | 1.125756 | 0.412158 | 63688 | 51   | 63637 |
| 585.4 Chronic kid   | 0.830971 | 1.073131 | 0.948275 | 0.416774 | 68918 | 346  | 68572 |
| 594.8 Renal colic   | 0.757881 | 1.107358 | 0.924179 | 0.417263 | 70554 | 170  | 70384 |
| 527.7 Disturbanc    | 0.748486 | 1.110681 | 0.921192 | 0.417642 | 70784 | 142  | 70642 |
| 614.31 Acute inflar | 0.511322 | 1.251459 | 0.829806 | 0.419457 | 65503 | 32   | 65471 |
| 344 Other paral     | 0.893352 | 1.262416 | 1.073692 | 0.422821 | 63788 | 151  | 63637 |
| 426.31 Right bundl  | 0.884329 | 1.276049 | 1.078355 | 0.423718 | 58998 | 119  | 58879 |
| 586.4 Stricture/ol  | 0.911719 | 1.212521 | 1.059984 | 0.425637 | 68809 | 237  | 68572 |
| 278.4 Abnormal v    | 0.971654 | 1.068105 | 1.01941  | 0.426012 | 62287 | 2388 | 59899 |
| 334.2 Anterior ho   | 0.629453 | 1.176143 | 0.879729 | 0.42674  | 63698 | 61   | 63637 |
| 255.12 Hyperaldos   | 0.842882 | 1.364205 | 1.103719 | 0.427836 | 67055 | 60   | 66995 |
| 290.11 Alzheimer's  | 0.844165 | 1.068391 | 0.95373  | 0.431268 | 67272 | 344  | 66928 |
| 170.2 Cancer of c   | 0.901133 | 1.231948 | 1.064877 | 0.433368 | 73032 | 171  | 72861 |
| 290.1 Dementias     | 0.890468 | 1.048193 | 0.967969 | 0.434108 | 67673 | 745  | 66928 |
| 747.2 Congenital    | 0.768879 | 1.106458 | 0.929868 | 0.435654 | 72117 | 180  | 71937 |
| 451 Phlebitis an    | 0.921972 | 1.183731 | 1.051132 | 0.435753 | 66006 | 283  | 65723 |
| 695.2 Bullous der   | 0.830904 | 1.376538 | 1.106925 | 0.436057 | 64474 | 50   | 64424 |
| 250.21 Type 2 diab  | 0.643849 | 1.178302 | 0.887179 | 0.441106 | 62226 | 68   | 62158 |
| 429 Ill-defined c   | 0.911846 | 1.039518 | 0.974731 | 0.444193 | 69785 | 1260 | 68525 |
| 253.3 Diabetes in   | 0.831626 | 1.381532 | 1.105754 | 0.444941 | 67061 | 66   | 66995 |
| 229.1 Benign neo    | 0.670096 | 1.159227 | 0.898061 | 0.446615 | 72883 | 76   | 72807 |
| 211 Benign neo      | 0.874624 | 1.056716 | 0.963897 | 0.44667  | 72005 | 594  | 71411 |
| 743.2 Pathologic t  | 0.867401 | 1.060028 | 0.961895 | 0.44844  | 64266 | 504  | 63762 |
| 958.2 Traumatic a   | 0.671758 | 1.160725 | 0.898809 | 0.448725 | 73088 | 79   | 73009 |

|                    |          |          |          |          |       |      |       |
|--------------------|----------|----------|----------|----------|-------|------|-------|
| 275 Disorders o    | 0.921449 | 1.03546  | 0.977771 | 0.450242 | 72418 | 1500 | 70918 |
| 860 Bone marrc     | 0.655934 | 1.17054  | 0.893744 | 0.451828 | 73161 | 72   | 73089 |
| 279.8 Other speci  | 0.837059 | 1.359911 | 1.098226 | 0.455748 | 69032 | 67   | 68965 |
| 748 Anomalies (    | 0.805881 | 1.43306  | 1.118121 | 0.455951 | 72902 | 48   | 72854 |
| 596.5 Functional ( | 0.874229 | 1.058227 | 0.964384 | 0.457397 | 70292 | 588  | 69704 |
| 727.5 Rupture of   | 0.766361 | 1.110442 | 0.931789 | 0.457733 | 59031 | 144  | 58887 |
| 961.1 Poisoning/c  | 0.870669 | 1.290307 | 1.077338 | 0.462076 | 68712 | 115  | 68597 |
| 695.9 Unspecifec   | 0.682871 | 1.159116 | 0.904894 | 0.463104 | 64509 | 85   | 64424 |
| 701.1 Keratoderm   | 0.792894 | 1.099356 | 0.940701 | 0.46524  | 68249 | 188  | 68061 |
| 388 Other disor    | 0.641932 | 1.182409 | 0.891347 | 0.465768 | 67621 | 61   | 67560 |
| 519.1 Tracheosto   | 0.722899 | 1.563472 | 1.158546 | 0.465774 | 70068 | 20   | 70048 |
| 359.1 Muscular d   | 0.771803 | 1.486849 | 1.133027 | 0.466472 | 70466 | 36   | 70430 |
| 253.1 Pituitary hy | 0.798133 | 1.098669 | 0.942373 | 0.468044 | 67228 | 233  | 66995 |
| 550.3 Femoral he   | 0.445233 | 1.310806 | 0.813946 | 0.468044 | 69747 | 21   | 69726 |
| 426.23 Second deg  | 0.851309 | 1.324732 | 1.086324 | 0.468242 | 58958 | 79   | 58879 |
| 590 Pyelonephr     | 0.940388 | 1.132512 | 1.034923 | 0.469858 | 57242 | 587  | 56655 |
| 362.29 Macular de  | 0.831579 | 1.080362 | 0.952991 | 0.471894 | 68537 | 272  | 68265 |
| 646 Other comp     | 0.937242 | 1.14062  | 1.036608 | 0.473385 | 72665 | 596  | 72069 |
| 527.2 Sialoadeniti | 0.747974 | 1.126438 | 0.927955 | 0.476722 | 70771 | 129  | 70642 |
| 79.9 Viremia, NC   | 0.463556 | 1.320635 | 0.824067 | 0.477217 | 63145 | 23   | 63122 |
| 676 Other disor    | 0.45505  | 1.331309 | 0.819892 | 0.47725  | 72831 | 25   | 72806 |
| 333.1 Essential tr | 0.862013 | 1.066988 | 0.962109 | 0.478547 | 64092 | 455  | 63637 |
| 480.11 Pneumococ   | 0.772956 | 1.4783   | 1.125983 | 0.483268 | 62910 | 31   | 62879 |
| 362.7 Hereditary   | 0.856112 | 1.30246  | 1.078359 | 0.485616 | 68354 | 89   | 68265 |
| 337 Disorders o    | 0.835852 | 1.083061 | 0.955608 | 0.49306  | 63982 | 345  | 63637 |
| 250.5 Glycosuria ( | 0.828934 | 1.367893 | 1.092693 | 0.493901 | 62230 | 72   | 62158 |
| 871.4 Open woun    | 0.593418 | 1.232331 | 0.87953  | 0.496563 | 68737 | 48   | 68689 |
| 184.1 Malignant r  | 0.905508 | 1.197161 | 1.04976  | 0.497382 | 66788 | 220  | 66568 |
| 711.3 Behcet's sy  | 0.563774 | 1.252956 | 0.869321 | 0.499053 | 64811 | 44   | 64767 |
| 803.3 Fracture of  | 0.897998 | 1.211975 | 1.052532 | 0.505483 | 66731 | 204  | 66527 |
| 79.2 Infectious r  | 0.758611 | 1.131231 | 0.934298 | 0.506582 | 63293 | 171  | 63122 |
| 716.1 Unspecifec   | 0.697113 | 1.164271 | 0.916211 | 0.507676 | 64858 | 91   | 64767 |
| 287.31 Primary thr | 0.877387 | 1.256253 | 1.062995 | 0.507936 | 68515 | 146  | 68369 |

|        |              |          |          |          |          |       |      |       |
|--------|--------------|----------|----------|----------|----------|-------|------|-------|
| 145    | Cancer of n  | 0.720705 | 1.149312 | 0.923737 | 0.508834 | 72584 | 98   | 72486 |
| 857    | Mechanical   | 0.749654 | 1.135038 | 0.933129 | 0.515885 | 70995 | 131  | 70864 |
| 365.5  | Pseudoexfc   | 0.470525 | 1.308176 | 0.839282 | 0.516302 | 68455 | 20   | 68435 |
| 740.12 | Osteoarthr   | 0.825877 | 1.339909 | 1.083867 | 0.519178 | 61563 | 56   | 61507 |
| 769    | Nonallopatl  | 0.693799 | 1.171185 | 0.917197 | 0.521498 | 73084 | 82   | 73002 |
| 530.3  | Stricture an | 0.853451 | 1.076948 | 0.962825 | 0.524178 | 58407 | 363  | 58044 |
| 752.2  | Other speci  | 0.682535 | 1.18321  | 0.91387  | 0.524535 | 72506 | 87   | 72419 |
| 987    | Toxic effect | 0.535857 | 1.284483 | 0.865489 | 0.525151 | 72870 | 31   | 72839 |
| 471    | Nasal polyp  | 0.800793 | 1.10748  | 0.948893 | 0.527681 | 53997 | 195  | 53802 |
| 363.3  | Chorioretin  | 0.740212 | 1.142681 | 0.931993 | 0.527947 | 68543 | 108  | 68435 |
| 523.32 | Chronic per  | 0.563275 | 1.261755 | 0.876151 | 0.528086 | 68362 | 34   | 68328 |
| 253.2  | Pituitary hy | 0.828439 | 1.337525 | 1.08084  | 0.53064  | 67069 | 74   | 66995 |
| 447.1  | Stricture of | 0.839056 | 1.314972 | 1.075362 | 0.530948 | 69492 | 74   | 69418 |
| 580.2  | Nephrotic s  | 0.5815   | 1.255922 | 0.882489 | 0.531227 | 68614 | 42   | 68572 |
| 614.4  | Inflammatc   | 0.845112 | 1.312883 | 1.073555 | 0.531902 | 65564 | 93   | 65471 |
| 364.9  | Cornea repl  | 0.791268 | 1.394274 | 1.095891 | 0.532638 | 68475 | 40   | 68435 |
| 643    | Excessive vi | 0.823926 | 1.098069 | 0.955463 | 0.534822 | 72963 | 301  | 72662 |
| 376    | Disorders o  | 0.758668 | 1.451091 | 1.110477 | 0.535521 | 65174 | 32   | 65142 |
| 204.1  | Lymphoid li  | 0.757495 | 1.137037 | 0.937809 | 0.537854 | 71878 | 138  | 71740 |
| 159.2  | Malignant r  | 0.665168 | 1.192489 | 0.911276 | 0.538011 | 70841 | 64   | 70777 |
| 136    | Other infec  | 0.882903 | 1.231306 | 1.053897 | 0.538673 | 72153 | 164  | 71989 |
| 370.1  | Corneal ulc  | 0.885854 | 1.22323  | 1.052235 | 0.538697 | 63720 | 168  | 63552 |
| 250.23 | Type 2 diab  | 0.909201 | 1.179301 | 1.041712 | 0.539282 | 62405 | 247  | 62158 |
| 573.6  | Nonspecific  | 0.895472 | 1.056392 | 0.974431 | 0.539414 | 66010 | 820  | 65190 |
| 612.1  | Galactorrh   | 0.796577 | 1.114273 | 0.948813 | 0.540816 | 61933 | 200  | 61733 |
| 704.2  | Hirsutism    | 0.869808 | 1.071324 | 0.968027 | 0.541575 | 68366 | 525  | 67841 |
| 377.1  | Optic atrop  | 0.765028 | 1.131634 | 0.940607 | 0.542245 | 65275 | 133  | 65142 |
| 732.1  | Juvenile ost | 0.580935 | 1.26445  | 0.884762 | 0.542954 | 65423 | 44   | 65379 |
| 379.5  | Disorders o  | 0.746304 | 1.143566 | 0.935922 | 0.545877 | 65253 | 111  | 65142 |
| 558    | Noninfectic  | 0.919218 | 1.044088 | 0.980776 | 0.550454 | 61968 | 1347 | 60621 |
| 442.8  | Aneurysm c   | 0.684409 | 1.185128 | 0.919065 | 0.551557 | 69492 | 74   | 69418 |
| 244.5  | Congenital   | 0.545637 | 1.290325 | 0.875589 | 0.553563 | 58500 | 34   | 58466 |
| 803    | Fracture of  | 0.926853 | 1.040261 | 0.98289  | 0.55803  | 68106 | 1579 | 66527 |

|                     |          |          |          |          |       |      |       |
|---------------------|----------|----------|----------|----------|-------|------|-------|
| 681.2 Cellulitis an | 0.914913 | 1.1615   | 1.035897 | 0.563454 | 66146 | 338  | 65808 |
| 332 Parkinson's     | 0.827166 | 1.098845 | 0.958966 | 0.564231 | 63883 | 246  | 63637 |
| 117 Mycoses         | 0.892286 | 1.201643 | 1.044877 | 0.565193 | 66560 | 197  | 66363 |
| 752 Nervous sy:     | 0.878753 | 1.231367 | 1.050749 | 0.567494 | 72601 | 182  | 72419 |
| 870.2 Open woun     | 0.740954 | 1.4971   | 1.111021 | 0.567777 | 68726 | 37   | 68689 |
| 174.2 Breast canc   | 0.762743 | 1.138239 | 0.943048 | 0.568648 | 64509 | 128  | 64381 |
| 574.3 Cholecystiti  | 0.917978 | 1.153011 | 1.033518 | 0.571785 | 70742 | 365  | 70377 |
| 635.3 Placenta pr   | 0.906008 | 1.178494 | 1.038734 | 0.57195  | 67644 | 311  | 67333 |
| 451.2 Phlebitis an  | 0.888047 | 1.208197 | 1.045589 | 0.572471 | 65911 | 188  | 65723 |
| 41.8 H. pylori      | 0.779438 | 1.131362 | 0.947563 | 0.572853 | 71236 | 154  | 71082 |
| 269 Proteinuria     | 0.925611 | 1.137774 | 1.029911 | 0.576373 | 72222 | 447  | 71775 |
| 519 Other disea     | 0.954787 | 1.082199 | 1.017844 | 0.580182 | 71266 | 1218 | 70048 |
| 250.1 Type 1 diab   | 0.95251  | 1.086295 | 1.018567 | 0.583454 | 63333 | 1175 | 62158 |
| 279.11 Deficiency ( | 0.85166  | 1.270269 | 1.057967 | 0.584383 | 69078 | 113  | 68965 |
| 300.8 Acute react   | 0.807588 | 1.114982 | 0.955882 | 0.584945 | 48996 | 204  | 48792 |
| 654.2 Rhesus isoi   | 0.80121  | 1.121397 | 0.954218 | 0.586072 | 71147 | 238  | 70909 |
| 709.7 Unspecifiec   | 0.82854  | 1.101803 | 0.961054 | 0.58612  | 63678 | 264  | 63414 |
| 315.2 Speech and    | 0.768338 | 1.430129 | 1.091827 | 0.587477 | 70978 | 46   | 70932 |
| 907 Injuries to t   | 0.825207 | 1.104731 | 0.960511 | 0.589471 | 72983 | 249  | 72734 |
| 252.2 Hypoparat     | 0.770895 | 1.13934  | 0.947422 | 0.59024  | 67136 | 141  | 66995 |
| 199.4 Neurofibroi   | 0.759648 | 1.441026 | 1.094201 | 0.590556 | 67661 | 43   | 67618 |
| 870.5 Open woun     | 0.856338 | 1.264109 | 1.05528  | 0.591139 | 68812 | 123  | 68689 |
| 320 Meningitis      | 0.774396 | 1.139237 | 0.948364 | 0.592278 | 72823 | 153  | 72670 |
| 250.42 Other abno   | 0.929029 | 1.041671 | 0.984658 | 0.59655  | 63754 | 1596 | 62158 |
| 756.5 Congenital    | 0.720015 | 1.490687 | 1.106167 | 0.597942 | 72102 | 29   | 72073 |
| 361.2 Retinoschis   | 0.482792 | 1.358108 | 0.867622 | 0.602858 | 68455 | 20   | 68435 |
| 535 Gastritis an    | 0.927246 | 1.043237 | 0.984503 | 0.603635 | 69641 | 1553 | 68088 |
| 110.12 Athlete's fo | 0.874118 | 1.225133 | 1.045777 | 0.605283 | 66507 | 144  | 66363 |
| 759.1 Anomalies (   | 0.70965  | 1.513327 | 1.106565 | 0.611686 | 72244 | 29   | 72215 |
| 270.38 Other speci  | 0.745176 | 1.448955 | 1.091129 | 0.615388 | 71808 | 33   | 71775 |
| 327.7 Sleep relate  | 0.907086 | 1.05638  | 0.980696 | 0.616371 | 62588 | 875  | 61713 |
| 729.1 Rheumatism    | 0.518919 | 1.333292 | 0.883412 | 0.617121 | 58910 | 23   | 58887 |
| 362.4 Retinal vasc  | 0.824312 | 1.108985 | 0.962752 | 0.617323 | 68482 | 217  | 68265 |

|                     |          |          |          |          |       |      |       |
|---------------------|----------|----------|----------|----------|-------|------|-------|
| 794 Abnormal r      | 0.616602 | 1.258083 | 0.911802 | 0.618502 | 73107 | 43   | 73064 |
| 292.11 Aphasia      | 0.899661 | 1.17186  | 1.033684 | 0.624472 | 67178 | 250  | 66928 |
| 560.3 Peritoneal c  | 0.783944 | 1.368038 | 1.073221 | 0.624857 | 60670 | 49   | 60621 |
| 875 Non-healing     | 0.762283 | 1.406165 | 1.080829 | 0.626462 | 68732 | 43   | 68689 |
| 636.8 Cervical inc  | 0.763782 | 1.156683 | 0.949643 | 0.627186 | 67473 | 140  | 67333 |
| 674 Other comp      | 0.827307 | 1.308256 | 1.058333 | 0.630786 | 72907 | 101  | 72806 |
| 362.1 Retinopath    | 0.65348  | 1.562287 | 1.117262 | 0.631772 | 68285 | 20   | 68265 |
| 686 Other local     | 0.932778 | 1.113195 | 1.021636 | 0.635596 | 66423 | 615  | 65808 |
| 596.1 Bladder nec   | 0.640204 | 1.246475 | 0.921429 | 0.636155 | 69754 | 50   | 69704 |
| 279.2 Autoimmun     | 0.726665 | 1.459984 | 1.090465 | 0.636423 | 68999 | 34   | 68965 |
| 353.1 Nerve plexu   | 0.721998 | 1.186955 | 0.941341 | 0.636819 | 66688 | 94   | 66594 |
| 727.7 Contracture   | 0.836027 | 1.272909 | 1.051965 | 0.640126 | 58977 | 90   | 58887 |
| 530.15 Eosinophilic | 0.667687 | 1.23183  | 0.929023 | 0.642025 | 58112 | 68   | 58044 |
| 356 Hereditary      | 0.954649 | 1.074805 | 1.014156 | 0.642255 | 71779 | 1349 | 70430 |
| 377.3 Optic neurit  | 0.820691 | 1.116728 | 0.964017 | 0.64226  | 65368 | 226  | 65142 |
| 149.4 Cancer of la  | 0.865563 | 1.224482 | 1.042251 | 0.642334 | 72627 | 141  | 72486 |
| 204.12 Lymphoid li  | 0.740033 | 1.175134 | 0.946306 | 0.642743 | 71841 | 101  | 71740 |
| 262 Mineral def     | 0.785242 | 1.360998 | 1.068414 | 0.642928 | 62050 | 54   | 61996 |
| 276.8 Polydipsia    | 0.747032 | 1.173694 | 0.948042 | 0.645676 | 64195 | 111  | 64084 |
| 556.11 Angiodyspl   | 0.636568 | 1.251551 | 0.922681 | 0.646384 | 60663 | 42   | 60621 |
| 370.2 Superficial l | 0.862572 | 1.227238 | 1.04233  | 0.647053 | 63679 | 127  | 63552 |
| 333.8 Other dege    | 0.662902 | 1.236059 | 0.929113 | 0.648098 | 63691 | 54   | 63637 |
| 255.3 Adrenogeni    | 0.762029 | 1.406135 | 1.074603 | 0.651932 | 67046 | 51   | 66995 |
| 270.11 Disturbanc   | 0.651772 | 1.586727 | 1.112162 | 0.653237 | 71798 | 23   | 71775 |
| 368.9 Subjective v  | 0.888133 | 1.072576 | 0.97862  | 0.653949 | 69910 | 578  | 69332 |
| 345.1 Epilepsy      | 0.920184 | 1.051854 | 0.984965 | 0.657192 | 64952 | 1315 | 63637 |
| 513.8 Disorders o   | 0.771559 | 1.370278 | 1.067617 | 0.661603 | 71978 | 49   | 71929 |
| 457 Encounter f     | 0.888975 | 1.072908 | 0.979204 | 0.661788 | 66277 | 554  | 65723 |
| 733.8 Malunion a    | 0.82757  | 1.115177 | 0.967149 | 0.661861 | 65609 | 230  | 65379 |
| 749 Congenital      | 0.713048 | 1.204483 | 0.942956 | 0.663595 | 72945 | 91   | 72854 |
| 580.1 Glomerulor    | 0.703855 | 1.212051 | 0.94122  | 0.665628 | 68649 | 77   | 68572 |
| 858 Complicatio     | 0.912406 | 1.140841 | 1.024913 | 0.666759 | 71238 | 374  | 70864 |
| 276.5 Hypovolem     | 0.966802 | 1.052582 | 1.009243 | 0.671441 | 67271 | 3187 | 64084 |

|                     |          |          |          |          |       |      |       |
|---------------------|----------|----------|----------|----------|-------|------|-------|
| 377 Disorders o     | 0.92023  | 1.127261 | 1.022172 | 0.672461 | 65609 | 467  | 65142 |
| 870.1 Open woun     | 0.801454 | 1.32444  | 1.056271 | 0.673611 | 68761 | 72   | 68689 |
| 164 Cancer of ir    | 0.521474 | 1.364768 | 0.900056 | 0.678467 | 72698 | 23   | 72675 |
| 695.81 Erythema n   | 0.67196  | 1.241865 | 0.936503 | 0.679524 | 64484 | 60   | 64424 |
| 153.3 Malignant r   | 0.869777 | 1.205688 | 1.035189 | 0.679856 | 67272 | 157  | 67115 |
| 303 Psychogeni      | 0.923264 | 1.120823 | 1.020591 | 0.680861 | 49327 | 535  | 48792 |
| 530.9 Heartburn     | 0.913021 | 1.135932 | 1.022911 | 0.685132 | 58437 | 393  | 58044 |
| 635 Hemorrhag       | 0.935761 | 1.101362 | 1.016987 | 0.68551  | 68202 | 869  | 67333 |
| 448 Disease of c    | 0.515575 | 1.373403 | 0.900284 | 0.685696 | 69442 | 24   | 69418 |
| 286.11 Von willebr  | 0.617032 | 1.301185 | 0.925163 | 0.687771 | 68417 | 48   | 68369 |
| 10 Tuberculosi      | 0.817417 | 1.292016 | 1.048107 | 0.690739 | 71165 | 83   | 71082 |
| 519.8 Other disea   | 0.783918 | 1.338663 | 1.056711 | 0.69104  | 70105 | 57   | 70048 |
| 333.3 Tics and cho  | 0.54256  | 1.366591 | 0.908526 | 0.691642 | 63665 | 28   | 63637 |
| 739 Contracture     | 0.812476 | 1.131873 | 0.966911 | 0.692126 | 67350 | 187  | 67163 |
| 253.5 Pituitary dv  | 0.615234 | 1.301032 | 0.925848 | 0.692194 | 67043 | 48   | 66995 |
| 252.1 Hyperparat    | 0.932311 | 1.104224 | 1.01722  | 0.692874 | 67621 | 626  | 66995 |
| 430.2 Intracerebr   | 0.899895 | 1.155059 | 1.025111 | 0.697749 | 68675 | 288  | 68387 |
| 366.1 Nonsenile C   | 0.629419 | 1.277109 | 0.93129  | 0.698923 | 67223 | 38   | 67185 |
| 910 Superficial i   | 0.691769 | 1.469124 | 1.078565 | 0.703049 | 73103 | 28   | 73075 |
| 71.1 HIV infectic   | 0.888414 | 1.174462 | 1.027419 | 0.704755 | 63346 | 224  | 63122 |
| 355 Complex re      | 0.8542   | 1.102985 | 0.975535 | 0.704877 | 66913 | 319  | 66594 |
| 526.1 Cysts of the  | 0.727943 | 1.429029 | 1.068696 | 0.706339 | 68366 | 38   | 68328 |
| 110.13 Dermatoph    | 0.779049 | 1.16271  | 0.962052 | 0.706471 | 66492 | 129  | 66363 |
| 519.9 Symptoms i    | 0.919549 | 1.055932 | 0.986833 | 0.70736  | 71106 | 1058 | 70048 |
| 480.5 Bronchopne    | 0.778475 | 1.342414 | 1.054488 | 0.707498 | 62935 | 56   | 62879 |
| 586.12 Vesicourete  | 0.601508 | 1.330554 | 0.928025 | 0.717372 | 68615 | 43   | 68572 |
| 535.2 Atrophic ga   | 0.892686 | 1.076868 | 0.982962 | 0.71988  | 68697 | 609  | 68088 |
| 971 Poisoning b     | 0.560928 | 1.367453 | 0.919945 | 0.72013  | 68627 | 30   | 68597 |
| 715.3 Spinal enth   | 0.737717 | 1.382187 | 1.059923 | 0.722618 | 64881 | 40   | 64841 |
| 281.11 Pernicious ; | 0.822347 | 1.131616 | 0.971643 | 0.725028 | 66875 | 206  | 66669 |
| 426.22 Mobitz II A\ | 0.578439 | 1.342132 | 0.926311 | 0.728638 | 58907 | 28   | 58879 |
| 325 Phlebitis an    | 0.727369 | 1.413796 | 1.062149 | 0.729014 | 72713 | 43   | 72670 |
| 333.2 Myoclonus     | 0.748474 | 1.392245 | 1.057411 | 0.729052 | 63686 | 49   | 63637 |

|                      |          |          |          |          |       |      |       |
|----------------------|----------|----------|----------|----------|-------|------|-------|
| 292.12 Symbolic dy   | 0.647387 | 1.535352 | 1.081981 | 0.730898 | 66950 | 22   | 66928 |
| 357 Inflammato       | 0.866288 | 1.098179 | 0.979718 | 0.735526 | 70783 | 353  | 70430 |
| 595 Hydroneph        | 0.923348 | 1.111799 | 1.016108 | 0.736338 | 70984 | 600  | 70384 |
| 313.2 Tics and stu   | 0.581799 | 1.360009 | 0.929104 | 0.73955  | 70967 | 35   | 70932 |
| 327.6 Circadian r    | 0.560155 | 1.366775 | 0.925403 | 0.740589 | 61740 | 27   | 61713 |
| 636.1 Threatened     | 0.918365 | 1.119968 | 1.016868 | 0.741388 | 67929 | 596  | 67333 |
| 253.4 Anterior pit   | 0.798747 | 1.153936 | 0.969501 | 0.742816 | 67157 | 162  | 66995 |
| 686.4 Pyogenic gr    | 0.657919 | 1.276314 | 0.945912 | 0.746458 | 65854 | 46   | 65808 |
| 716.8 Palindromic    | 0.690373 | 1.437593 | 1.063064 | 0.751484 | 64797 | 30   | 64767 |
| 578.9 Hemorrhag      | 0.904937 | 1.13631  | 1.018609 | 0.751539 | 64276 | 369  | 63907 |
| 594 Urinary calc     | 0.940587 | 1.043829 | 0.991638 | 0.752033 | 72450 | 2066 | 70384 |
| 374.2 Lagophthal     | 0.670005 | 1.459453 | 1.066596 | 0.752669 | 63575 | 23   | 63552 |
| 599.1 Urinary obs    | 0.723453 | 1.217649 | 0.958846 | 0.754694 | 58814 | 75   | 58739 |
| 277.51 Lipoprotein   | 0.613551 | 1.323269 | 0.939581 | 0.755913 | 71799 | 36   | 71763 |
| 594.1 Calculus of    | 0.935205 | 1.04817  | 0.991014 | 0.756449 | 72097 | 1713 | 70384 |
| 594.3 Calculus of    | 0.891771 | 1.081683 | 0.984827 | 0.756612 | 70983 | 599  | 70384 |
| 313.3 Autism         | 0.745829 | 1.393181 | 1.051387 | 0.756928 | 70991 | 59   | 70932 |
| 594.2 Calculus of    | 0.685659 | 1.255217 | 0.953119 | 0.759307 | 70444 | 60   | 70384 |
| 414.2 ASCVD          | 0.872127 | 1.097389 | 0.982283 | 0.760936 | 67748 | 374  | 67374 |
| 335 Multiple scl     | 0.925612 | 1.056006 | 0.989865 | 0.762033 | 64918 | 1281 | 63637 |
| 131 Protozoan i      | 0.82198  | 1.142127 | 0.975044 | 0.763685 | 72164 | 175  | 71989 |
| 870 Open woun        | 0.919022 | 1.061448 | 0.989169 | 0.767188 | 69716 | 1027 | 68689 |
| 363 Chorioretin      | 0.847514 | 1.117332 | 0.979361 | 0.768203 | 68680 | 245  | 68435 |
| 586.2 Cyst of kidn   | 0.890772 | 1.084662 | 0.98578  | 0.775967 | 69106 | 534  | 68572 |
| 803.21 Colles' fract | 0.829636 | 1.134055 | 0.977502 | 0.776329 | 66728 | 201  | 66527 |
| 264.9 Lack of nori   | 0.766046 | 1.351606 | 1.042085 | 0.778439 | 62067 | 71   | 61996 |
| 580.12 Non-prolife   | 0.568286 | 1.3855   | 0.936421 | 0.779209 | 68601 | 29   | 68572 |
| 790 Nonspecific      | 0.90129  | 1.076429 | 0.987369 | 0.77932  | 68858 | 669  | 68189 |
| 709.6 Other speci    | 0.878346 | 1.094844 | 0.984446 | 0.780802 | 63837 | 423  | 63414 |
| 870.3 Other open     | 0.917313 | 1.11384  | 1.013896 | 0.780863 | 69229 | 540  | 68689 |
| 498 Acute bron       | 0.827875 | 1.246174 | 1.029571 | 0.781718 | 63248 | 115  | 63133 |
| 850 Hemorrhag        | 0.895027 | 1.144362 | 1.017513 | 0.782494 | 71182 | 318  | 70864 |
| 360 Disorders o      | 0.804133 | 1.157269 | 0.974887 | 0.785467 | 68582 | 147  | 68435 |

|                     |          |          |          |          |       |      |       |
|---------------------|----------|----------|----------|----------|-------|------|-------|
| 592.12 Chronic cys  | 0.741772 | 1.212674 | 0.967856 | 0.796887 | 56733 | 78   | 56655 |
| 250.25 Diabetes ty  | 0.796798 | 1.167131 | 0.97524  | 0.798095 | 62289 | 131  | 62158 |
| 535.6 Duodenitis    | 0.80878  | 1.264122 | 1.029224 | 0.802511 | 68189 | 101  | 68088 |
| 782 Symptoms        | 0.840832 | 1.216913 | 1.023875 | 0.803793 | 67319 | 135  | 67184 |
| 742.2 Pathologica   | 0.751963 | 1.211349 | 0.970155 | 0.805116 | 65313 | 102  | 65211 |
| 780 Hypotherm       | 0.710291 | 1.251436 | 0.964619 | 0.805519 | 73131 | 66   | 73065 |
| 213 Benign neo      | 0.829644 | 1.140317 | 0.980261 | 0.806775 | 58769 | 201  | 58568 |
| 218.2 Other beniğ   | 0.859086 | 1.190212 | 1.020524 | 0.808054 | 65662 | 176  | 65486 |
| 264.3 Delayed mi    | 0.637068 | 1.341711 | 0.954385 | 0.808211 | 62040 | 44   | 61996 |
| 528.7 Sialolithiasi | 0.636846 | 1.50044  | 1.056368 | 0.808912 | 70663 | 21   | 70642 |
| 374.1 Ectropion o   | 0.840434 | 1.209838 | 1.022446 | 0.812417 | 63670 | 118  | 63552 |
| 731.1 Osteitis def  | 0.572401 | 1.373565 | 0.947169 | 0.814146 | 65402 | 23   | 65379 |
| 429.2 Abnormal f    | 0.914472 | 1.11214  | 1.011673 | 0.816503 | 69032 | 507  | 68525 |
| 619.4 Noninflamr    | 0.931523 | 1.089783 | 1.009255 | 0.818133 | 67570 | 878  | 66692 |
| 288.3 Eosinophili   | 0.841696 | 1.213931 | 1.021758 | 0.818908 | 66004 | 146  | 65858 |
| 741.6 Villonodula   | 0.611189 | 1.352247 | 0.954595 | 0.823091 | 65242 | 31   | 65211 |
| 733.4 Aseptic nec   | 0.780323 | 1.187676 | 0.976158 | 0.82318  | 65488 | 109  | 65379 |
| 669 Complicatic     | 0.84761  | 1.129878 | 0.983745 | 0.823616 | 73050 | 296  | 72754 |
| 755.1 Congenital    | 0.766856 | 1.201398 | 0.974659 | 0.824214 | 72175 | 102  | 72073 |
| 430.1 Subarachnc    | 0.858477 | 1.185741 | 1.018177 | 0.827799 | 68569 | 182  | 68387 |
| 634.3 Ectopic pre   | 0.839454 | 1.217348 | 1.020808 | 0.82878  | 67485 | 152  | 67333 |
| 386.21 Central orig | 0.829924 | 1.222766 | 1.02162  | 0.830036 | 64080 | 117  | 63963 |
| 772.6 Facial weak   | 0.85813  | 1.184824 | 1.017767 | 0.831426 | 68336 | 171  | 68165 |
| 295.2 Paranoid di   | 0.882101 | 1.152274 | 1.014574 | 0.832494 | 49056 | 264  | 48792 |
| 705.1 Dyshidrosis   | 0.744334 | 1.225203 | 0.973489 | 0.834289 | 66116 | 73   | 66043 |
| 635.2 Antepartun    | 0.911211 | 1.1139   | 1.010212 | 0.843002 | 67907 | 574  | 67333 |
| 255.13 Medulloadr   | 0.656126 | 1.314052 | 0.965666 | 0.847031 | 67035 | 40   | 66995 |
| 723.1 Torticollis   | 0.680659 | 1.297894 | 0.968719 | 0.849277 | 62683 | 51   | 62632 |
| 134 Helminthia:     | 0.604431 | 1.38429  | 0.960098 | 0.850792 | 72019 | 30   | 71989 |
| 202.22 Reticulosar  | 0.716012 | 1.260694 | 0.973043 | 0.851851 | 71803 | 63   | 71740 |
| 350.5 Abnormal r    | 0.724091 | 1.357811 | 1.030841 | 0.853001 | 69458 | 46   | 69412 |
| 573.7 Abnormal r    | 0.936703 | 1.054204 | 0.994738 | 0.861158 | 66739 | 1549 | 65190 |
| 334 Degenerati      | 0.876815 | 1.108008 | 0.989598 | 0.861247 | 64023 | 386  | 63637 |



|                    |          |          |          |          |       |      |       |
|--------------------|----------|----------|----------|----------|-------|------|-------|
| 361.1 Retinal det  | 0.78485  | 1.192017 | 0.981505 | 0.86214  | 68541 | 106  | 68435 |
| 184.2 Cancer of o  | 0.846542 | 1.190306 | 1.014715 | 0.867424 | 66725 | 157  | 66568 |
| 938.1 Acute derm   | 0.588404 | 1.40404  | 0.962772 | 0.868294 | 62323 | 29   | 62294 |
| 527.8 Other speci  | 0.570238 | 1.416975 | 0.96114  | 0.869008 | 70664 | 22   | 70642 |
| 184.11 Malignant r | 0.846791 | 1.189603 | 1.014449 | 0.86945  | 66729 | 161  | 66568 |
| 701.3 Circumscrik  | 0.796146 | 1.183994 | 0.983513 | 0.870556 | 68187 | 126  | 68061 |
| 647.1 Infections c | 0.89006  | 1.137821 | 1.010213 | 0.871339 | 72241 | 380  | 71861 |
| 990 Effects radi   | 0.831386 | 1.208906 | 1.015682 | 0.87158  | 72830 | 131  | 72699 |
| 290.16 Vascular de | 0.802705 | 1.243565 | 1.018199 | 0.872709 | 67009 | 81   | 66928 |
| 781.1 Loss of heig | 0.720775 | 1.259654 | 0.978431 | 0.880124 | 71728 | 61   | 71667 |
| 338.1 Acute pain   | 0.951794 | 1.05736  | 1.004005 | 0.881642 | 70397 | 1893 | 68504 |
| 420.21 Acute peric | 0.672108 | 1.423022 | 1.029415 | 0.882837 | 71938 | 31   | 71907 |
| 184 Cancer of o    | 0.899677 | 1.120417 | 1.008213 | 0.884102 | 66963 | 395  | 66568 |
| 275.5 Disorders o  | 0.922437 | 1.092307 | 1.006153 | 0.887032 | 71602 | 684  | 70918 |
| 586.3 Vascular dis | 0.680779 | 1.39997  | 1.026122 | 0.891838 | 68609 | 37   | 68572 |
| 535.9 Gastritis an | 0.875286 | 1.151149 | 1.009545 | 0.892227 | 68362 | 274  | 68088 |
| 41.9 Infection w   | 0.794495 | 1.256583 | 1.016064 | 0.89262  | 71175 | 93   | 71082 |
| 977 Personal hi    | 0.75875  | 1.297979 | 1.018503 | 0.895126 | 68665 | 68   | 68597 |
| 433.6 Acute, but i | 0.911017 | 1.080482 | 0.9944   | 0.897433 | 69023 | 636  | 68387 |
| 364.2 Corneal ede  | 0.758339 | 1.226278 | 0.984435 | 0.899336 | 68511 | 76   | 68435 |
| 379.4 Anomalies o  | 0.705126 | 1.289738 | 0.981401 | 0.904542 | 65199 | 57   | 65142 |
| 443.1 Raynaud's s  | 0.884827 | 1.106339 | 0.993355 | 0.907102 | 69845 | 427  | 69418 |
| 378.2 Nystagmus    | 0.69541  | 1.299317 | 0.981457 | 0.908248 | 65195 | 53   | 65142 |
| 741.1 Ankylosis o  | 0.648868 | 1.350243 | 0.97861  | 0.910035 | 65245 | 34   | 65211 |
| 556 Ulceration o   | 0.83003  | 1.160316 | 0.990391 | 0.91051  | 60800 | 179  | 60621 |
| 149 Cancer of la   | 0.861403 | 1.161903 | 1.008486 | 0.91227  | 72690 | 204  | 72486 |
| 117.1 Histoplasmo  | 0.807507 | 1.227142 | 1.011543 | 0.915207 | 66470 | 107  | 66363 |
| 695.8 Other speci  | 0.849343 | 1.175645 | 1.008622 | 0.918007 | 64605 | 181  | 64424 |
| 731 Osteitis def   | 0.684273 | 1.373072 | 1.018809 | 0.918445 | 65411 | 32   | 65379 |
| 305.21 Anorexia ne | 0.777241 | 1.224177 | 0.988131 | 0.918523 | 48927 | 135  | 48792 |
| 556.1 Ulceration o | 0.815366 | 1.178061 | 0.990935 | 0.923209 | 60769 | 148  | 60621 |
| 255.22 Mineraloco  | 0.65641  | 1.409744 | 1.019127 | 0.925056 | 67027 | 32   | 66995 |
| 411.3 Angina pect  | 0.923595 | 1.071599 | 0.9966   | 0.928502 | 68263 | 889  | 67374 |

|                     |          |          |          |          |       |     |       |
|---------------------|----------|----------|----------|----------|-------|-----|-------|
| 227.2 Benign neo    | 0.839743 | 1.18345  | 1.007594 | 0.931541 | 71525 | 154 | 71371 |
| 531.3 Duodenal u    | 0.799005 | 1.234881 | 1.009644 | 0.931788 | 71646 | 101 | 71545 |
| 756.3 Congenital    | 0.762202 | 1.242812 | 0.989927 | 0.935944 | 72176 | 103 | 72073 |
| 362.22 Macular de   | 0.840939 | 1.17917  | 1.006931 | 0.936456 | 68407 | 142 | 68265 |
| 512.3 Abnormal c    | 0.698123 | 1.304437 | 0.987222 | 0.937079 | 49349 | 47  | 49302 |
| 457.2 Encounter f   | 0.730767 | 1.314929 | 1.011934 | 0.938046 | 65775 | 52  | 65723 |
| 876 Posttrauma      | 0.651795 | 1.4157   | 1.015846 | 0.93854  | 68719 | 30  | 68689 |
| 911 Blister         | 0.595988 | 1.490428 | 1.018273 | 0.940665 | 73120 | 22  | 73098 |
| 574.11 Cholelithias | 0.824561 | 1.202577 | 1.007139 | 0.941488 | 70521 | 144 | 70377 |
| 210 Benign neo      | 0.851822 | 1.144791 | 0.99474  | 0.944488 | 72711 | 225 | 72486 |
| 425.8 Other cardi   | 0.635252 | 1.374394 | 0.986066 | 0.944883 | 71938 | 31  | 71907 |
| 743.22 Pathologic f | 0.707671 | 1.33288  | 1.011429 | 0.945143 | 63805 | 43  | 63762 |
| 145.2 Cancer of tr  | 0.655845 | 1.350947 | 0.987088 | 0.945266 | 72521 | 35  | 72486 |
| 816 Cerebral lac    | 0.742568 | 1.303305 | 1.010033 | 0.945381 | 71374 | 66  | 71308 |
| 252 Disorders o     | 0.924072 | 1.083564 | 1.002777 | 0.945631 | 67736 | 741 | 66995 |
| 215 Other benign    | 0.858925 | 1.158566 | 1.005185 | 0.946235 | 72052 | 219 | 71833 |
| 346.1 Nonspecific   | 0.88435  | 1.129664 | 1.004108 | 0.94779  | 63978 | 341 | 63637 |
| 732 Osteochond      | 0.782794 | 1.254175 | 1.007923 | 0.948156 | 65473 | 94  | 65379 |
| 756.2 Pectus and    | 0.667661 | 1.35141  | 0.988127 | 0.948236 | 72117 | 44  | 72073 |
| 90.2 Gonococcal     | 0.621602 | 1.440585 | 0.986172 | 0.94882  | 72887 | 29  | 72858 |
| 253.11 Acromegaly   | 0.641452 | 1.419509 | 1.013329 | 0.949594 | 67024 | 29  | 66995 |
| 522 Diseases of     | 0.863983 | 1.154126 | 1.004682 | 0.949734 | 68563 | 235 | 68328 |
| 580.32 Nephritis ar | 0.69222  | 1.326046 | 0.989511 | 0.950302 | 68625 | 53  | 68572 |
| 535.8 Other speci   | 0.915227 | 1.082329 | 0.997421 | 0.951919 | 68832 | 744 | 68088 |
| 819 Skull and fa    | 0.912706 | 1.095747 | 1.002591 | 0.955809 | 71956 | 648 | 71308 |
| 250.7 Diabetic ret  | 0.872146 | 1.12632  | 0.996425 | 0.956345 | 68536 | 271 | 68265 |
| 418.1 Precordial p  | 0.903986 | 1.104081 | 1.002311 | 0.963979 | 54800 | 465 | 54335 |
| 522.5 Periapical a  | 0.846794 | 1.156586 | 0.996526 | 0.965215 | 68534 | 206 | 68328 |
| 514.2 Solitary pul  | 0.906943 | 1.099691 | 1.001807 | 0.970765 | 71782 | 527 | 71255 |
| 426.25 Other heart  | 0.598523 | 1.431192 | 0.991845 | 0.971731 | 58903 | 24  | 58879 |
| 598 Abnormal f      | 0.712359 | 1.327255 | 1.005583 | 0.972533 | 72961 | 47  | 72914 |
| 983 Toxic effect    | 0.586457 | 1.475683 | 0.991826 | 0.972977 | 72861 | 22  | 72839 |
| 334.1 Spinocereb    | 0.764142 | 1.2492   | 0.995877 | 0.973979 | 63718 | 81  | 63637 |

|                    |          |          |          |          |       |      |       |                                            |
|--------------------|----------|----------|----------|----------|-------|------|-------|--------------------------------------------|
| 789.1 Persistent v | 0.739255 | 1.300396 | 1.00457  | 0.975075 | 62808 | 66   | 62742 |                                            |
| 742.8 Articular ca | 0.748903 | 1.264412 | 0.995779 | 0.975075 | 65283 | 72   | 65211 |                                            |
| 158 Neoplasm c     | 0.829614 | 1.174049 | 0.997319 | 0.97598  | 70937 | 160  | 70777 |                                            |
| 960.1 Adverse eff  | 0.575221 | 1.505927 | 1.007649 | 0.97623  | 68618 | 21   | 68597 |                                            |
| 512.1 Wheezing     | 0.934404 | 1.065247 | 0.999026 | 0.976768 | 50481 | 1179 | 49302 |                                            |
| 242.2 Toxic multi  | 0.86013  | 1.142524 | 0.99809  | 0.979027 | 58697 | 231  | 58466 |                                            |
| 458.1 Orthostatic  | 0.892186 | 1.109323 | 0.998539 | 0.979061 | 71212 | 447  | 70765 |                                            |
| 375.2 Epiphora     | 0.800887 | 1.205443 | 0.997895 | 0.984014 | 65242 | 100  | 65142 |                                            |
| 732.7 Osteochon    | 0.667182 | 1.367379 | 0.996583 | 0.985422 | 65418 | 39   | 65379 |                                            |
| 721.8 Other alliec | 0.758442 | 1.256117 | 0.997685 | 0.985799 | 62705 | 73   | 62632 |                                            |
| 429.9 Cardiac con  | 0.761879 | 1.263115 | 1.002205 | 0.986559 | 68603 | 78   | 68525 |                                            |
| 644 Anemia dur     | 0.821583 | 1.198255 | 1.001324 | 0.98908  | 73121 | 157  | 72964 |                                            |
| 597.1 Urethral str | 0.653844 | 1.382563 | 1.001668 | 0.99324  | 69738 | 34   | 69704 |                                            |
| 450 Noninfectic    | 0.877006 | 1.127578 | 0.999763 | 0.997054 | 73017 | 301  | 72716 |                                            |
| 360.3 Hypotony c   | 0.632841 | 1.391907 | 0.999272 | 0.9972   | 68461 | 26   | 68435 |                                            |
| 347 Cataplexy a    | 0.779605 | 1.242906 | 0.99982  | 0.998799 | 63740 | 103  | 63637 |                                            |
| 187 Cancer of o    | NA       | NA       | NA       | NA       | 73119 | 5    | 73114 | [Error: < 20 cases or controls]            |
| 185 Cancer of p    | NA       | NA       | NA       | NA       | 72997 | 8    | 72989 | [Error: < 20 cases or controls]            |
| 601.3 Orchitis anc | NA       | NA       | NA       | NA       | 72990 | 1    | 72989 | [Error: < 20 cases or controls]            |
| 384.1 Myringitis   | NA       | NA       | NA       | NA       | 64303 | 17   | 64286 | [Error: < 20 cases or controls]            |
| 525.2 Atrophy of   | NA       | NA       | NA       | NA       | 68347 | 19   | 68328 | [Error: < 20 cases or controls]            |
| 389.3 Degenerati   | NA       | NA       | NA       | NA       | 67578 | 18   | 67560 | [Error: < 20 cases or controls]            |
| 149.2 Cancer of n  | NA       | NA       | NA       | NA       | 72498 | 12   | 72486 | [Error: < 20 cases or controls]            |
| 592.3 Urethral str | NA       | NA       | NA       | NA       | 56657 | 2    | 56655 | [Error: < 20 cases or controls]            |
| 657 Infections s   | NA       | NA       | NA       | NA       | 73157 | 5    | 73152 | [Error: < 20 cases or controls]            |
| 117.4 Aspergillo   | NA       | NA       | NA       | NA       | 66382 | 19   | 66363 | [Error: < 20 cases or controls]            |
| 609 Male infert    | NA       | NA       | NA       | NA       | 72976 | 6    | 72970 | [Error: < 20 cases or controls]            |
| 521.2 Dental abra  | NA       | NA       | NA       | NA       | 68330 | 2    | 68328 | [Error: < 20 cases or controls]            |
| 480.13 MRSA pneu   | NA       | NA       | NA       | NA       | 62886 | 7    | 62879 | [Error: < 20 cases or controls]            |
| 988 Toxic effect   | NA       | NA       | NA       | NA       | 72843 | 4    | 72839 | [Error: < 20 cases or controls]            |
| 604.2 Vascular di  | NA       | NA       | NA       | NA       | 72970 | NA   | NA    | [Error: non-varying phenotype or genotype] |
| 270.34 Alpha-1-ant | NA       | NA       | NA       | NA       | 71794 | 19   | 71775 | [Error: < 20 cases or controls]            |
| 446.3 Hypersensiti | NA       | NA       | NA       | NA       | 69433 | 15   | 69418 | [Error: < 20 cases or controls]            |

|                     |    |    |    |       |    |       |                                            |
|---------------------|----|----|----|-------|----|-------|--------------------------------------------|
| 958.1 Postoperati   | NA | NA | NA | 73011 | 2  | 73009 | [Error: < 20 cases or controls]            |
| 609.2 Abnormal s    | NA | NA | NA | 72971 | 1  | 72970 | [Error: < 20 cases or controls]            |
| 286.13 Congenital   | NA | NA | NA | 68380 | 11 | 68369 | [Error: < 20 cases or controls]            |
| 446.8 Thrombotic    | NA | NA | NA | 69423 | 5  | 69418 | [Error: < 20 cases or controls]            |
| 444.5 Atheroemb     | NA | NA | NA | 69422 | 4  | 69418 | [Error: < 20 cases or controls]            |
| 133 Arthropod-      | NA | NA | NA | 71997 | 8  | 71989 | [Error: < 20 cases or controls]            |
| 612.3 Congenital    | NA | NA | NA | 61746 | 13 | 61733 | [Error: < 20 cases or controls]            |
| 750.14 Congenital   | NA | NA | NA | 71770 | 10 | 71760 | [Error: < 20 cases or controls]            |
| 286.6 Defibrinatic  | NA | NA | NA | 68376 | 7  | 68369 | [Error: < 20 cases or controls]            |
| 870.6 Open woun     | NA | NA | NA | 68705 | 16 | 68689 | [Error: < 20 cases or controls]            |
| 592.21 Urethral sy  | NA | NA | NA | 56659 | 4  | 56655 | [Error: < 20 cases or controls]            |
| 230 Kaposi's sar    | NA | NA | NA | 73180 | 1  | 73179 | [Error: < 20 cases or controls]            |
| 270.21 Disorders o  | NA | NA | NA | 71786 | 11 | 71775 | [Error: < 20 cases or controls]            |
| 480.3 Pneumonia     | NA | NA | NA | 62891 | 12 | 62879 | [Error: < 20 cases or controls]            |
| 656.8 Perinatal ja  | NA | NA | NA | 73019 | 6  | 73013 | [Error: < 20 cases or controls]            |
| 972.1 Cardiac rhy   | NA | NA | NA | 68614 | 17 | 68597 | [Error: < 20 cases or controls]            |
| 31.1 Leprosy        | NA | NA | NA | 71082 | NA | NA    | [Error: non-varying phenotype or genotype] |
| 527.1 Hypertroph    | NA | NA | NA | 70650 | 8  | 70642 | [Error: < 20 cases or controls]            |
| 729.7 Nontrauma     | NA | NA | NA | 58893 | 6  | 58887 | [Error: < 20 cases or controls]            |
| 379.51 Pigmentary   | NA | NA | NA | 65160 | 18 | 65142 | [Error: < 20 cases or controls]            |
| 694.3 Vascular di   | NA | NA | NA | 64438 | 14 | 64424 | [Error: < 20 cases or controls]            |
| 941 Adverse re      | NA | NA | NA | 62305 | 11 | 62294 | [Error: < 20 cases or controls]            |
| 949.1 Diaper or n   | NA | NA | NA | 62310 | 16 | 62294 | [Error: < 20 cases or controls]            |
| 277.6 Other defic   | NA | NA | NA | 71780 | 17 | 71763 | [Error: < 20 cases or controls]            |
| 756.22 Pectus carir | NA | NA | NA | 72078 | 5  | 72073 | [Error: < 20 cases or controls]            |
| 284.1 Pancytoper    | NA | NA | NA | 66681 | 12 | 66669 | [Error: < 20 cases or controls]            |
| 277.8 Carnitine d   | NA | NA | NA | 71763 | NA | NA    | [Error: non-varying phenotype or genotype] |
| 187.2 Malignant r   | NA | NA | NA | 73115 | 1  | 73114 | [Error: < 20 cases or controls]            |
| 187.1 Malignant r   | NA | NA | NA | 73115 | 1  | 73114 | [Error: < 20 cases or controls]            |
| 722.3 Schmorl's n   | NA | NA | NA | 62647 | 15 | 62632 | [Error: < 20 cases or controls]            |
| 315.1 Learning di   | NA | NA | NA | 70946 | 14 | 70932 | [Error: < 20 cases or controls]            |
| 702.4 Degenerati    | NA | NA | NA | 63949 | 17 | 63932 | [Error: < 20 cases or controls]            |
| 81.1 Graft-versu    | NA | NA | NA | 72427 | 8  | 72419 | [Error: < 20 cases or controls]            |

|                     |    |    |    |       |    |       |                                            |
|---------------------|----|----|----|-------|----|-------|--------------------------------------------|
| 691.1 Ichthyosis c  | NA | NA | NA | 64427 | 3  | 64424 | [Error: < 20 cases or controls]            |
| 695.21 Dermatitis l | NA | NA | NA | 64436 | 12 | 64424 | [Error: < 20 cases or controls]            |
| 145.1 Cancer of li  | NA | NA | NA | 72492 | 6  | 72486 | [Error: < 20 cases or controls]            |
| 656.1 Isoimmuniz    | NA | NA | NA | 73013 | NA | NA    | [Error: non-varying phenotype or genotype] |
| 605 Erectile dys    | NA | NA | NA | 72980 | 10 | 72970 | [Error: < 20 cases or controls]            |
| 750.5 Congenital    | NA | NA | NA | 71761 | 1  | 71760 | [Error: < 20 cases or controls]            |
| 624.2 Atrophy of    | NA | NA | NA | 63900 | 11 | 63889 | [Error: < 20 cases or controls]            |
| 259.8 Polyglandul   | NA | NA | NA | 67004 | 9  | 66995 | [Error: < 20 cases or controls]            |
| 580.11 Proliferativ | NA | NA | NA | 68587 | 15 | 68572 | [Error: < 20 cases or controls]            |
| 735.22 Claw toe (a  | NA | NA | NA | 67171 | 8  | 67163 | [Error: < 20 cases or controls]            |
| 637 Short gesta     | NA | NA | NA | 67330 | 2  | 67328 | [Error: < 20 cases or controls]            |
| 70.1 Viral hepati   | NA | NA | NA | 63137 | 15 | 63122 | [Error: < 20 cases or controls]            |
| 363.4 Choroidal d   | NA | NA | NA | 68442 | 7  | 68435 | [Error: < 20 cases or controls]            |
| 573.1 Chronic pas   | NA | NA | NA | 65196 | 6  | 65190 | [Error: < 20 cases or controls]            |
| 598.4 Other cells   | NA | NA | NA | 72922 | 8  | 72914 | [Error: < 20 cases or controls]            |
| 134.1 Intestinal h  | NA | NA | NA | 72007 | 18 | 71989 | [Error: < 20 cases or controls]            |
| 986 Toxic effect    | NA | NA | NA | 72847 | 8  | 72839 | [Error: < 20 cases or controls]            |
| 443.7 Peripheral ;  | NA | NA | NA | 69430 | 12 | 69418 | [Error: < 20 cases or controls]            |
| 510.2 Lung transç   | NA | NA | NA | 70610 | 12 | 70598 | [Error: < 20 cases or controls]            |
| 586.11 Small kidne  | NA | NA | NA | 68574 | 2  | 68572 | [Error: < 20 cases or controls]            |
| 132.1 Pediculosis   | NA | NA | NA | 72004 | 15 | 71989 | [Error: < 20 cases or controls]            |
| 420.1 Myocarditis   | NA | NA | NA | 71925 | 18 | 71907 | [Error: < 20 cases or controls]            |
| 712 Infective co    | NA | NA | NA | 64781 | 14 | 64767 | [Error: < 20 cases or controls]            |
| 433.32 Moyamoya     | NA | NA | NA | 68397 | 10 | 68387 | [Error: < 20 cases or controls]            |
| 324.1 Jakob-Creu    | NA | NA | NA | 72675 | 5  | 72670 | [Error: < 20 cases or controls]            |
| 601.4 Balanopost    | NA | NA | NA | 72989 | NA | NA    | [Error: non-varying phenotype or genotype] |
| 442.3 Aneurysm c    | NA | NA | NA | 69435 | 17 | 69418 | [Error: < 20 cases or controls]            |
| 985 Toxic effect    | NA | NA | NA | 72849 | 10 | 72839 | [Error: < 20 cases or controls]            |
| 222 Benign neo      | NA | NA | NA | 73117 | 3  | 73114 | [Error: < 20 cases or controls]            |
| 283.21 Hemolytic-ı  | NA | NA | NA | 66671 | 2  | 66669 | [Error: < 20 cases or controls]            |
| 656.9 Neonatal bı   | NA | NA | NA | 73013 | NA | NA    | [Error: non-varying phenotype or genotype] |
| 976 Poisoning b     | NA | NA | NA | 68609 | 12 | 68597 | [Error: < 20 cases or controls]            |
| 710.2 Periostitis   | NA | NA | NA | 64771 | 4  | 64767 | [Error: < 20 cases or controls]            |

|                        |    |    |    |          |    |       |                                            |
|------------------------|----|----|----|----------|----|-------|--------------------------------------------|
| 656.4 Hemorrhag NA     | NA | NA | NA | 73018    | 5  | 73013 | [Error: < 20 cases or controls]            |
| 8.7 Intestinal ir NA   | NA | NA | NA | 71947    | 6  | 71941 | [Error: < 20 cases or controls]            |
| 145.4 Cancer of tl NA  | NA | NA | NA | 72492    | 6  | 72486 | [Error: < 20 cases or controls]            |
| 187.8 Neoplasm c NA    | NA | NA | NA | 73116    | 2  | 73114 | [Error: < 20 cases or controls]            |
| 270.31 Polyclonal f NA | NA | NA | NA | 71785    | 10 | 71775 | [Error: < 20 cases or controls]            |
| 965.2 Antirheumã NA    | NA | NA | NA | 68605    | 8  | 68597 | [Error: < 20 cases or controls]            |
| 984 Toxic effect NA    | NA | NA | NA | 72843    | 4  | 72839 | [Error: < 20 cases or controls]            |
| 257.1 Testicular h NA  | NA | NA | NA | 67007    | 12 | 66995 | [Error: < 20 cases or controls]            |
| 751.12 Congenital NA   | NA | NA | NA | 71761    | 1  | 71760 | [Error: < 20 cases or controls]            |
| 823 Fracture of NA     | NA | NA | NA | 65271 NA | NA |       | [Error: non-varying phenotype or genotype] |
| 446.1 Thromboan NA     | NA | NA | NA | 69423    | 5  | 69418 | [Error: < 20 cases or controls]            |
| 368.5 Color vision NA  | NA | NA | NA | 69334    | 2  | 69332 | [Error: < 20 cases or controls]            |
| 256.1 Hyperestro NA    | NA | NA | NA | 67002    | 7  | 66995 | [Error: < 20 cases or controls]            |
| 281.13 Folate-defic NA | NA | NA | NA | 66679    | 10 | 66669 | [Error: < 20 cases or controls]            |
| 603.1 Hydrocele NA     | NA | NA | NA | 72972    | 2  | 72970 | [Error: < 20 cases or controls]            |
| 687.3 Changes in NA    | NA | NA | NA | 60265    | 14 | 60251 | [Error: < 20 cases or controls]            |
| 972.2 Antilipemic NA   | NA | NA | NA | 68599    | 2  | 68597 | [Error: < 20 cases or controls]            |
| 258 Iatrogenic e NA    | NA | NA | NA | 67003    | 8  | 66995 | [Error: < 20 cases or controls]            |
| 500.1 Extrinsic all NA | NA | NA | NA | 68246    | 18 | 68228 | [Error: < 20 cases or controls]            |
| 851 Complicatc NA      | NA | NA | NA | 70882    | 18 | 70864 | [Error: < 20 cases or controls]            |
| 626.2 Mittelschm NA    | NA | NA | NA | 50939    | 11 | 50928 | [Error: < 20 cases or controls]            |
| 656.2 Respiratory NA   | NA | NA | NA | 73032    | 19 | 73013 | [Error: < 20 cases or controls]            |
| 601.1 Prostatitis NA   | NA | NA | NA | 72991    | 2  | 72989 | [Error: < 20 cases or controls]            |
| 41.21 Rheumatic NA     | NA | NA | NA | 71091    | 9  | 71082 | [Error: < 20 cases or controls]            |
| 960.3 Poisoning b NA   | NA | NA | NA | 68599    | 2  | 68597 | [Error: < 20 cases or controls]            |
| 366.3 Traumatic c NA   | NA | NA | NA | 67196    | 11 | 67185 | [Error: < 20 cases or controls]            |
| 257 Testicular d NA    | NA | NA | NA | 67012    | 17 | 66995 | [Error: < 20 cases or controls]            |
| 599.7 Urethral dis NA  | NA | NA | NA | 58739 NA | NA |       | [Error: non-varying phenotype or genotype] |
| 520.1 Hereditary NA    | NA | NA | NA | 68339    | 11 | 68328 | [Error: < 20 cases or controls]            |
| 601.8 Other inflar NA  | NA | NA | NA | 72990    | 1  | 72989 | [Error: < 20 cases or controls]            |
| 285.8 Hemoglobin NA    | NA | NA | NA | 66674    | 5  | 66669 | [Error: < 20 cases or controls]            |
| 783.1 Postproced NA    | NA | NA | NA | 67528    | 14 | 67514 | [Error: < 20 cases or controls]            |
| 204.3 Monocytic l NA   | NA | NA | NA | 71750    | 10 | 71740 | [Error: < 20 cases or controls]            |

|                        |    |    |    |          |    |       |                                            |
|------------------------|----|----|----|----------|----|-------|--------------------------------------------|
| 453 Chronic ver NA     | NA | NA | NA | 65729    | 6  | 65723 | [Error: < 20 cases or controls]            |
| 522.1 Pulpitis and NA  | NA | NA | NA | 68346    | 18 | 68328 | [Error: < 20 cases or controls]            |
| 710.3 Osteopathy NA    | NA | NA | NA | 64769    | 2  | 64767 | [Error: < 20 cases or controls]            |
| 283.2 Non-autoin NA    | NA | NA | NA | 66676    | 7  | 66669 | [Error: < 20 cases or controls]            |
| 981 Toxic effect NA    | NA | NA | NA | 72856    | 17 | 72839 | [Error: < 20 cases or controls]            |
| 81.11 Acute graft NA   | NA | NA | NA | 72419 NA | NA |       | [Error: non-varying phenotype or genotype] |
| 580.13 Acute glom NA   | NA | NA | NA | 68587    | 15 | 68572 | [Error: < 20 cases or controls]            |
| 261.1 Vitamin A d NA   | NA | NA | NA | 62003    | 7  | 61996 | [Error: < 20 cases or controls]            |
| 656.5 Hematologi NA    | NA | NA | NA | 73014    | 1  | 73013 | [Error: < 20 cases or controls]            |
| 394.3 Aortic valve NA  | NA | NA | NA | 68644    | 8  | 68636 | [Error: < 20 cases or controls]            |
| 79.1 Varicella ini NA  | NA | NA | NA | 63134    | 12 | 63122 | [Error: < 20 cases or controls]            |
| 371.33 Noninfectic NA  | NA | NA | NA | 63562    | 10 | 63552 | [Error: < 20 cases or controls]            |
| 284.2 Constitutio NA   | NA | NA | NA | 66670    | 1  | 66669 | [Error: < 20 cases or controls]            |
| 285.3 Sideroblast NA   | NA | NA | NA | 66675    | 6  | 66669 | [Error: < 20 cases or controls]            |
| 711.2 Reiter's dis NA  | NA | NA | NA | 64785    | 18 | 64767 | [Error: < 20 cases or controls]            |
| 749.2 Congenital NA    | NA | NA | NA | 72872    | 18 | 72854 | [Error: < 20 cases or controls]            |
| 251.8 Abnormalit NA    | NA | NA | NA | 67000    | 5  | 66995 | [Error: < 20 cases or controls]            |
| 736.3 Acquired d NA    | NA | NA | NA | 67172    | 9  | 67163 | [Error: < 20 cases or controls]            |
| 254 Diseases of NA     | NA | NA | NA | 67013    | 18 | 66995 | [Error: < 20 cases or controls]            |
| 604 Disorders o NA     | NA | NA | NA | 72971    | 1  | 72970 | [Error: < 20 cases or controls]            |
| 277.2 Other disor NA   | NA | NA | NA | 71767    | 4  | 71763 | [Error: < 20 cases or controls]            |
| 275.2 Disorders o NA   | NA | NA | NA | 70926    | 8  | 70918 | [Error: < 20 cases or controls]            |
| 964.1 Anticoagul NA    | NA | NA | NA | 68612    | 15 | 68597 | [Error: < 20 cases or controls]            |
| 870.8 Open woun NA     | NA | NA | NA | 68700    | 11 | 68689 | [Error: < 20 cases or controls]            |
| 368.7 Disorders o NA   | NA | NA | NA | 69333    | 1  | 69332 | [Error: < 20 cases or controls]            |
| 656.26 Transitory t NA | NA | NA | NA | 73013 NA | NA |       | [Error: non-varying phenotype or genotype] |
| 874 Complicatic NA     | NA | NA | NA | 68704    | 15 | 68689 | [Error: < 20 cases or controls]            |
| 656.22 Interstitial NA | NA | NA | NA | 73016    | 3  | 73013 | [Error: < 20 cases or controls]            |
| 753.2 Congenital NA    | NA | NA | NA | 72437    | 18 | 72419 | [Error: < 20 cases or controls]            |
| 301.1 Schizoid pe NA   | NA | NA | NA | 48809    | 17 | 48792 | [Error: < 20 cases or controls]            |
| 603.2 Spermatoc NA     | NA | NA | NA | 72970 NA | NA |       | [Error: non-varying phenotype or genotype] |
| 604.1 Redundant NA     | NA | NA | NA | 72970 NA | NA |       | [Error: non-varying phenotype or genotype] |
| 521.4 Tooth com NA     | NA | NA | NA | 68340    | 12 | 68328 | [Error: < 20 cases or controls]            |

|                    |    |    |    |       |    |       |                                            |
|--------------------|----|----|----|-------|----|-------|--------------------------------------------|
| 656.6 Perinatal di | NA | NA | NA | 73017 | 4  | 73013 | [Error: < 20 cases or controls]            |
| 446.2 Acute febril | NA | NA | NA | 69422 | 4  | 69418 | [Error: < 20 cases or controls]            |
| 446.6 Polyarteriti | NA | NA | NA | 69435 | 17 | 69418 | [Error: < 20 cases or controls]            |
| 261.3 Vitamin C d  | NA | NA | NA | 61997 | 1  | 61996 | [Error: < 20 cases or controls]            |
| 749.1 Cleft palate | NA | NA | NA | 68491 | 16 | 68475 | [Error: < 20 cases or controls]            |
| 600 Hyperplasi     | NA | NA | NA | 73001 | 12 | 72989 | [Error: < 20 cases or controls]            |
| 244.3 Iodine hypc  | NA | NA | NA | 58475 | 9  | 58466 | [Error: < 20 cases or controls]            |
| 602.3 Dysplasia o  | NA | NA | NA | 72989 | NA | NA    | [Error: non-varying phenotype or genotype] |
| 939.1 Contact an   | NA | NA | NA | 62310 | 16 | 62294 | [Error: < 20 cases or controls]            |
| 974 Poisoning b    | NA | NA | NA | 68616 | 19 | 68597 | [Error: < 20 cases or controls]            |
| 272.14 Hyperchyl   | NA | NA | NA | 54920 | 8  | 54912 | [Error: < 20 cases or controls]            |
| 277.1 Disorders o  | NA | NA | NA | 71782 | 19 | 71763 | [Error: < 20 cases or controls]            |
| 716.3 Kaschin-Ber  | NA | NA | NA | 64771 | 4  | 64767 | [Error: < 20 cases or controls]            |
| 289.1 Myelofibro   | NA | NA | NA | 65865 | 7  | 65858 | [Error: < 20 cases or controls]            |
| 271.9 Other disor  | NA | NA | NA | 73047 | 12 | 73035 | [Error: < 20 cases or controls]            |
| 957 Injury to ot   | NA | NA | NA | 73123 | 5  | 73118 | [Error: < 20 cases or controls]            |
| 601 Inflammato     | NA | NA | NA | 72993 | 4  | 72989 | [Error: < 20 cases or controls]            |
| 608 Other disor    | NA | NA | NA | 72973 | 3  | 72970 | [Error: < 20 cases or controls]            |
| 750.13 Congenital  | NA | NA | NA | 71771 | 11 | 71760 | [Error: < 20 cases or controls]            |
| 216.1 Screening f  | NA | NA | NA | 65886 | NA | NA    | [Error: non-varying phenotype or genotype] |
| 323.2 Acute (tran  | NA | NA | NA | 72687 | 17 | 72670 | [Error: < 20 cases or controls]            |
| 602 Other disor    | NA | NA | NA | 72990 | 1  | 72989 | [Error: < 20 cases or controls]            |
| 696.2 Parapsorias  | NA | NA | NA | 64435 | 11 | 64424 | [Error: < 20 cases or controls]            |
| 737.2 Lordosis (ac | NA | NA | NA | 67179 | 16 | 67163 | [Error: < 20 cases or controls]            |
| 117.3 Blastomyco   | NA | NA | NA | 66370 | 7  | 66363 | [Error: < 20 cases or controls]            |
| 459.7 Blood vess   | NA | NA | NA | 70766 | 1  | 70765 | [Error: < 20 cases or controls]            |
| 603 Other disor    | NA | NA | NA | 72973 | 3  | 72970 | [Error: < 20 cases or controls]            |
| 300.2 Generalize   | NA | NA | NA | 48792 | NA | NA    | [Error: non-varying phenotype or genotype] |
| 601.12 Chronic prc | NA | NA | NA | 72989 | NA | NA    | [Error: non-varying phenotype or genotype] |
| 564.9 Personal hi  | NA | NA | NA | 60625 | 4  | 60621 | [Error: < 20 cases or controls]            |
| 604.3 Peyronie's   | NA | NA | NA | 72970 | NA | NA    | [Error: non-varying phenotype or genotype] |
| 283.1 Autoimmun    | NA | NA | NA | 66681 | 12 | 66669 | [Error: < 20 cases or controls]            |
| 736.5 Acquired d   | NA | NA | NA | 67171 | 8  | 67163 | [Error: < 20 cases or controls]            |



|                         |    |    |    |          |    |       |                                            |
|-------------------------|----|----|----|----------|----|-------|--------------------------------------------|
| 750.15 Congenital NA    | NA | NA | NA | 71766    | 6  | 71760 | [Error: < 20 cases or controls]            |
| 753.1 Congenital NA     | NA | NA | NA | 72428    | 9  | 72419 | [Error: < 20 cases or controls]            |
| 716.2 Unspecific NA     | NA | NA | NA | 64781    | 14 | 64767 | [Error: < 20 cases or controls]            |
| 442.2 Aneurysm c NA     | NA | NA | NA | 69425    | 7  | 69418 | [Error: < 20 cases or controls]            |
| 480.2 Viral pneun NA    | NA | NA | NA | 62896    | 17 | 62879 | [Error: < 20 cases or controls]            |
| 973 Poisoning b NA      | NA | NA | NA | 68604    | 7  | 68597 | [Error: < 20 cases or controls]            |
| 656.7 Conditions NA     | NA | NA | NA | 73015    | 2  | 73013 | [Error: < 20 cases or controls]            |
| 588.2 Secondary l NA    | NA | NA | NA | 68591    | 19 | 68572 | [Error: < 20 cases or controls]            |
| 530.7 Gastroesop NA     | NA | NA | NA | 58058    | 14 | 58044 | [Error: < 20 cases or controls]            |
| 656.3 Endocrine ε NA    | NA | NA | NA | 73016    | 3  | 73013 | [Error: < 20 cases or controls]            |
| 755.3 Congenital NA     | NA | NA | NA | 72080    | 7  | 72073 | [Error: < 20 cases or controls]            |
| 270.35 Macroglobi NA    | NA | NA | NA | 71789    | 14 | 71775 | [Error: < 20 cases or controls]            |
| 796 Elevated pr NA      | NA | NA | NA | 72992    | 3  | 72989 | [Error: < 20 cases or controls]            |
| 260.21 Kwashiorkc NA    | NA | NA | NA | 62004    | 8  | 61996 | [Error: < 20 cases or controls]            |
| 569.1 Toxic gastrc NA   | NA | NA | NA | 67567    | 6  | 67561 | [Error: < 20 cases or controls]            |
| 270.12 Phenylketo NA    | NA | NA | NA | 71788    | 13 | 71775 | [Error: < 20 cases or controls]            |
| 755.4 Congenital NA     | NA | NA | NA | 72088    | 15 | 72073 | [Error: < 20 cases or controls]            |
| 145.5 Cancer of tl NA   | NA | NA | NA | 72490    | 4  | 72486 | [Error: < 20 cases or controls]            |
| 452.8 Postphlebit NA    | NA | NA | NA | 65740    | 17 | 65723 | [Error: < 20 cases or controls]            |
| 706.3 Seborrhea NA      | NA | NA | NA | 66047    | 4  | 66043 | [Error: < 20 cases or controls]            |
| 601.11 Acute prost NA   | NA | NA | NA | 72990    | 1  | 72989 | [Error: < 20 cases or controls]            |
| 609.1 Infertility, n NA | NA | NA | NA | 72974    | 4  | 72970 | [Error: < 20 cases or controls]            |
| 81.12 Chronic gra NA    | NA | NA | NA | 72426    | 7  | 72419 | [Error: < 20 cases or controls]            |
| 736.4 Genu valgu NA     | NA | NA | NA | 67182    | 19 | 67163 | [Error: < 20 cases or controls]            |
| 686.5 Pyoderma NA       | NA | NA | NA | 65824    | 16 | 65808 | [Error: < 20 cases or controls]            |
| 609.11 Azoosperm NA     | NA | NA | NA | 72970 NA | NA |       | [Error: non-varying phenotype or genotype] |
| 117.2 Coccidioido NA    | NA | NA | NA | 66365    | 2  | 66363 | [Error: < 20 cases or controls]            |
| 149.3 Cancer of h NA    | NA | NA | NA | 72491    | 5  | 72486 | [Error: < 20 cases or controls]            |
| 537.1 Lesions of s NA   | NA | NA | NA | 68098    | 10 | 68088 | [Error: < 20 cases or controls]            |
| 790.9 Abnormal a NA     | NA | NA | NA | 68191    | 2  | 68189 | [Error: < 20 cases or controls]            |
| 500.2 Pneumocor NA      | NA | NA | NA | 68233    | 5  | 68228 | [Error: < 20 cases or controls]            |
| 8.51 Intestinal e NA    | NA | NA | NA | 71942    | 1  | 71941 | [Error: < 20 cases or controls]            |
| 480.12 Pseudomor NA     | NA | NA | NA | 62894    | 15 | 62879 | [Error: < 20 cases or controls]            |

|                     |    |    |    |       |   |                                       |
|---------------------|----|----|----|-------|---|---------------------------------------|
| 446.7 Takayasu's NA | NA | NA | NA | 69426 | 8 | 69418 [Error: < 20 cases or controls] |
|---------------------|----|----|----|-------|---|---------------------------------------|

**Supplemental Table E3**

| phecode | description                | lower    | upper    | OR       | p        | n_total | n_cases | n_controls | note |
|---------|----------------------------|----------|----------|----------|----------|---------|---------|------------|------|
| 416     | Cardiomegaly               | 1.885007 | 3.035259 | 2.376228 | 9.98E-13 | 828     | 116     | 712        |      |
| 428     | Congestive                 | 1.676587 | 2.531261 | 2.049133 | 8.21E-12 | 776     | 187     | 589        |      |
| 428.1   | Congestive                 | 1.709896 | 2.680277 | 2.130568 | 3.87E-11 | 744     | 155     | 589        |      |
| 428.3   | Heart failure              | 1.85174  | 3.124922 | 2.389118 | 6.07E-11 | 684     | 95      | 589        |      |
| 496     | Chronic airway disease     | 1.701271 | 2.754866 | 2.151622 | 4.10E-10 | 868     | 86      | 782        |      |
| 415     | Pulmonary                  | 1.828101 | 3.235962 | 2.417849 | 1.23E-09 | 786     | 74      | 712        |      |
| 415.2   | Chronic pulmonary          | 2.00752  | 3.906619 | 2.784652 | 1.34E-09 | 761     | 49      | 712        |      |
| 428.2   | Heart failure              | 1.783624 | 3.262886 | 2.391905 | 1.42E-08 | 650     | 61      | 589        |      |
| 496.1   | Emphysema                  | 1.757221 | 3.561487 | 2.473789 | 3.73E-07 | 807     | 25      | 782        |      |
| 415.21  | Primary pulmonary          | 3.141553 | 13.00048 | 6.009536 | 4.95E-07 | 724     | 12      | 712        |      |
| 278.11  | Morbid obesity             | 1.514978 | 2.620889 | 1.987077 | 7.51E-07 | 795     | 55      | 740        |      |
| 509.1   | Respiratory                | 1.691638 | 3.499453 | 2.404644 | 1.35E-06 | 781     | 16      | 765        |      |
| 496.2   | Chronic bronchitis         | 1.664407 | 3.334922 | 2.331823 | 1.38E-06 | 812     | 30      | 782        |      |
| 278     | Overweight                 | 1.304308 | 1.96056  | 1.596977 | 6.19E-06 | 892     | 152     | 740        |      |
| 425.2   | Secondary/obesity          | 1.394468 | 2.394843 | 1.824558 | 1.12E-05 | 828     | 67      | 761        |      |
| 278.1   | Obesity                    | 1.298778 | 1.990214 | 1.606261 | 1.22E-05 | 870     | 130     | 740        |      |
| 507     | Pleurisy; pleuritis        | 1.384838 | 2.388633 | 1.819463 | 1.30E-05 | 809     | 44      | 765        |      |
| 745     | Pain in joints             | 0.516118 | 0.77965  | 0.637819 | 1.92E-05 | 882     | 290     | 592        |      |
| 496.21  | Obstructive pulmonary      | 1.525219 | 3.259955 | 2.223889 | 2.42E-05 | 802     | 20      | 782        |      |
| 286.2   | Encounter for hypertension | 1.251841 | 1.864474 | 1.526417 | 2.93E-05 | 858     | 157     | 701        |      |
| 458     | Hypotension                | 1.374847 | 2.52911  | 1.874938 | 3.93E-05 | 889     | 31      | 858        |      |
| 509     | Respiratory                | 1.370102 | 2.521211 | 1.863403 | 4.59E-05 | 794     | 29      | 765        |      |
| 426.9   | Cardiac pacemaker          | 1.341769 | 2.331202 | 1.760218 | 5.65E-05 | 466     | 117     | 349        |      |
| 428.4   | Heart failure              | 1.420694 | 2.848937 | 1.989183 | 7.37E-05 | 620     | 31      | 589        |      |
| 480     | Pneumonia                  | 1.313978 | 2.324713 | 1.75935  | 8.10E-05 | 824     | 35      | 789        |      |
| 585     | Renal failure              | 1.264847 | 2.050253 | 1.615597 | 8.45E-05 | 870     | 66      | 804        |      |
| 510     | Other disease              | 1.253926 | 1.999712 | 1.587257 | 9.03E-05 | 928     | 74      | 854        |      |
| 425.1   | Primary/interventive       | 1.221076 | 1.852626 | 1.503317 | 0.000115 | 894     | 133     | 761        |      |
| 425     | Cardiomyopathy             | 1.2017   | 1.807011 | 1.473025 | 0.000182 | 906     | 145     | 761        |      |
| 426.92  | Cardiac defibrillator      | 1.350656 | 2.626783 | 1.878145 | 0.00019  | 416     | 67      | 349        |      |
| 585.1   | Acute renal                | 1.307009 | 2.532541 | 1.840012 | 0.000219 | 827     | 23      | 804        |      |

|                       |          |          |          |          |     |     |     |
|-----------------------|----------|----------|----------|----------|-----|-----|-----|
| 502 Postinflamr       | 1.337658 | 2.740216 | 1.928608 | 0.000244 | 789 | 24  | 765 |
| 427.21 Atrial fibrill | 1.196539 | 1.791895 | 1.457562 | 0.000248 | 620 | 271 | 349 |
| 443 Peripheral \      | 1.238685 | 2.069607 | 1.606938 | 0.00025  | 808 | 63  | 745 |
| 427.2 Atrial fibrill  | 1.188601 | 1.776843 | 1.446698 | 0.000309 | 625 | 276 | 349 |
| 394 Rheumatic         | 1.282144 | 2.39358  | 1.762096 | 0.000317 | 706 | 36  | 670 |
| 394.7 Disease of t    | 1.340653 | 2.864712 | 1.9729   | 0.000352 | 689 | 19  | 670 |
| 512.7 Shortness c     | 1.161872 | 1.683329 | 1.39293  | 0.000443 | 692 | 295 | 397 |
| 272.11 Hyperchole     | 0.444047 | 0.789981 | 0.598397 | 0.000475 | 450 | 194 | 256 |
| 276.1 Electrolyte     | 1.194971 | 2.001765 | 1.55588  | 0.000679 | 865 | 59  | 806 |
| 276.13 Hyperpotas     | 1.338872 | 3.337879 | 2.15359  | 0.000702 | 819 | 13  | 806 |
| 289.8 Polycyther      | 1.314373 | 3.368466 | 2.151654 | 0.000963 | 851 | 11  | 840 |
| 426.91 Cardiac pac    | 1.237062 | 2.399462 | 1.716803 | 0.001293 | 419 | 70  | 349 |
| 702 Degenerati        | 0.469679 | 0.825735 | 0.629185 | 0.001295 | 855 | 129 | 726 |
| 512.9 Other dyspi     | 1.155707 | 1.815146 | 1.445791 | 0.001302 | 540 | 143 | 397 |
| 272 Disorders o       | 0.62547  | 0.8926   | 0.748292 | 0.001343 | 888 | 632 | 256 |
| 272.1 Hyperlipide     | 0.62547  | 0.8926   | 0.748292 | 0.001343 | 888 | 632 | 256 |
| 318 Tobacco us        | 1.135097 | 1.722282 | 1.400833 | 0.001426 | 894 | 121 | 773 |
| 327.3 Sleep apne:     | 1.13062  | 1.710185 | 1.39145  | 0.001659 | 824 | 148 | 676 |
| 272.13 Mixed hype     | 0.550027 | 0.866089 | 0.6954   | 0.001668 | 545 | 289 | 256 |
| 208 Benign neo        | 0.541411 | 0.864733 | 0.689596 | 0.001864 | 903 | 181 | 722 |
| 513 Respiratory       | 1.203518 | 2.630496 | 1.818275 | 0.002156 | 924 | 19  | 905 |
| 465.2 Acute phar      | 0.182354 | 0.666578 | 0.362131 | 0.002189 | 734 | 32  | 702 |
| 504 Other alvec       | 1.214056 | 2.920115 | 1.931816 | 0.00232  | 779 | 14  | 765 |
| 458.9 Hypotensio      | 1.185712 | 2.546879 | 1.777008 | 0.002478 | 877 | 19  | 858 |
| 514 Abnormal f        | 1.162229 | 2.376468 | 1.702489 | 0.002846 | 911 | 22  | 889 |
| 317.1 Alcoholism      | 1.192251 | 2.855229 | 1.893761 | 0.002848 | 785 | 12  | 773 |
| 443.9 Peripheral \    | 1.137234 | 1.958489 | 1.504294 | 0.002869 | 803 | 58  | 745 |
| 562 Diverticulos      | 0.500303 | 0.862067 | 0.663628 | 0.003152 | 840 | 133 | 707 |
| 513.4 Hyperventil     | 1.193425 | 3.052453 | 1.968105 | 0.003339 | 915 | 10  | 905 |
| 327.32 Obstructive    | 1.108225 | 1.731113 | 1.387939 | 0.003733 | 795 | 119 | 676 |
| 562.1 Diverticulos    | 0.503805 | 0.869089 | 0.668746 | 0.003838 | 838 | 131 | 707 |
| 216 Benign neo        | 0.338049 | 0.799095 | 0.530005 | 0.003895 | 863 | 60  | 803 |
| 427.8 Sinoatrial n    | 1.169701 | 2.338913 | 1.651134 | 0.004285 | 414 | 65  | 349 |

|                     |          |          |          |          |     |     |     |
|---------------------|----------|----------|----------|----------|-----|-----|-----|
| 276 Disorders o     | 1.104499 | 1.779355 | 1.410114 | 0.004364 | 889 | 83  | 806 |
| 771.1 Swelling of   | 1.124174 | 2.172321 | 1.594175 | 0.004637 | 895 | 28  | 867 |
| 452 Other veno      | 1.121154 | 2.098013 | 1.55799  | 0.004716 | 739 | 32  | 707 |
| 465 Acute uppe      | 0.463522 | 0.867725 | 0.643127 | 0.005842 | 801 | 99  | 702 |
| 726 Peripheral c    | 0.519593 | 0.890566 | 0.687581 | 0.006451 | 843 | 132 | 711 |
| 512 Other symp      | 1.070631 | 1.508655 | 1.266782 | 0.006753 | 849 | 452 | 397 |
| 702.2 Seborrheic    | 0.450882 | 0.869829 | 0.635254 | 0.006856 | 857 | 92  | 765 |
| 512.2 Painful resp  | 1.235479 | 4.04732  | 2.194003 | 0.007046 | 407 | 10  | 397 |
| 503 Pulmonary       | 1.09864  | 2.466828 | 1.690697 | 0.008956 | 784 | 19  | 765 |
| 440.9 Atheroscler   | 1.079859 | 2.515714 | 1.707379 | 0.010239 | 759 | 14  | 745 |
| 386.9 Dizziness ar  | 0.478768 | 0.898377 | 0.664486 | 0.010984 | 870 | 98  | 772 |
| 573.9 Abnormal s    | 1.070981 | 2.911072 | 1.854445 | 0.011285 | 800 | 10  | 790 |
| 420 Carditis        | 1.085013 | 2.707295 | 1.768229 | 0.011452 | 777 | 16  | 761 |
| 426.3 Bundle brai   | 1.102029 | 2.221048 | 1.567047 | 0.011557 | 410 | 61  | 349 |
| 395 Heart valve     | 1.052677 | 1.552917 | 1.280909 | 0.01212  | 835 | 165 | 670 |
| 189.1 Cancer of k   | 1.060245 | 2.51876  | 1.701894 | 0.013157 | 926 | 15  | 911 |
| 870 Open woun       | 0.100443 | 0.719256 | 0.288068 | 0.013487 | 875 | 14  | 861 |
| 401.22 Hypertensi   | 1.116643 | 2.992838 | 1.834898 | 0.013881 | 252 | 19  | 233 |
| 605 Erectile dys    | 0.470514 | 0.908628 | 0.663515 | 0.01472  | 723 | 88  | 635 |
| 199 Neoplasm c      | 0.33566  | 0.870854 | 0.554366 | 0.01563  | 886 | 48  | 838 |
| 300 Anxiety, ph     | 1.049581 | 1.757908 | 1.369136 | 0.015803 | 782 | 71  | 711 |
| 420.2 Pericarditis  | 1.050585 | 2.753167 | 1.763113 | 0.016592 | 775 | 14  | 761 |
| 395.1 Nonrheum      | 1.044051 | 1.699281 | 1.339637 | 0.017687 | 759 | 89  | 670 |
| 473.4 Voice distu   | 0.236232 | 0.845287 | 0.465813 | 0.019181 | 720 | 28  | 692 |
| 427 Cardiac dys     | 1.037545 | 1.467423 | 1.229497 | 0.019223 | 846 | 497 | 349 |
| 250 Diabetes m      | 1.034122 | 1.503304 | 1.248813 | 0.01929  | 842 | 177 | 665 |
| 189 Cancer of u     | 1.025627 | 2.198345 | 1.550128 | 0.02153  | 934 | 23  | 911 |
| 782.3 Edema         | 1.031052 | 1.751698 | 1.359532 | 0.021716 | 890 | 61  | 829 |
| 427.1 Paroxysmal    | 1.044426 | 1.763409 | 1.353516 | 0.022835 | 483 | 134 | 349 |
| 798 Malaise anc     | 0.641671 | 0.963046 | 0.79106  | 0.023517 | 853 | 222 | 631 |
| 530.13 Barrett's es | 0.143738 | 0.823716 | 0.3651   | 0.024322 | 690 | 17  | 673 |
| 250.2 Type 2 diab   | 1.025263 | 1.500071 | 1.242498 | 0.024567 | 836 | 171 | 665 |
| 426.32 Left bundle  | 1.057273 | 2.618533 | 1.675129 | 0.024731 | 382 | 33  | 349 |

|                      |          |          |          |          |     |     |     |
|----------------------|----------|----------|----------|----------|-----|-----|-----|
| 317 Alcohol-rela     | 1.007152 | 2.263161 | 1.566351 | 0.025083 | 791 | 18  | 773 |
| 292.4 Altered me     | 1.009358 | 2.212163 | 1.548107 | 0.025722 | 866 | 20  | 846 |
| 508 Pulmonary        | 1.024322 | 1.66557  | 1.314137 | 0.026462 | 857 | 92  | 765 |
| 426.24 Atrioventric  | 1.052807 | 2.762184 | 1.713765 | 0.027376 | 381 | 32  | 349 |
| 425.12 Other hype    | 0.973773 | 2.603998 | 1.690327 | 0.02861  | 772 | 11  | 761 |
| 350.2 Abnormalit     | 0.997399 | 2.772889 | 1.740751 | 0.029477 | 898 | 15  | 883 |
| 569.2 Gastrointes    | 0.977628 | 2.527566 | 1.659176 | 0.030355 | 849 | 11  | 838 |
| 702.1 Actinic kera   | 0.498912 | 0.952445 | 0.69939  | 0.030392 | 852 | 87  | 765 |
| 440 Atheroscler      | 1.008875 | 1.818101 | 1.373349 | 0.032505 | 798 | 53  | 745 |
| 381 Otitis medi      | 0.350479 | 0.927638 | 0.586756 | 0.032572 | 883 | 42  | 841 |
| 427.12 Paroxysmal    | 1.019614 | 1.815713 | 1.357377 | 0.036723 | 447 | 98  | 349 |
| 274.1 Gout           | 1.001716 | 1.737371 | 1.336615 | 0.037221 | 913 | 58  | 855 |
| 427.22 Atrial flutte | 1.016528 | 1.806574 | 1.355663 | 0.03727  | 465 | 116 | 349 |
| 300.1 Anxiety disc   | 1.000031 | 1.757484 | 1.341405 | 0.038751 | 770 | 59  | 711 |
| 761 Cervicalgia      | 0.509322 | 0.96838  | 0.713012 | 0.039413 | 907 | 86  | 821 |
| 444 Arterial em      | 0.952204 | 2.629204 | 1.671872 | 0.039619 | 756 | 11  | 745 |
| 433.6 Acute, but i   | 0.165363 | 0.901298 | 0.409755 | 0.040145 | 777 | 17  | 760 |
| 727 Other disor      | 0.423634 | 0.958523 | 0.652632 | 0.040965 | 766 | 55  | 711 |
| 604 Disorders o      | 0.201004 | 0.921789 | 0.454248 | 0.043503 | 653 | 18  | 635 |
| 426 Cardiac con      | 1.00701  | 1.566426 | 1.254047 | 0.043956 | 568 | 219 | 349 |
| 585.3 Chronic ren    | 0.984564 | 1.863487 | 1.378298 | 0.046054 | 847 | 43  | 804 |
| 418 Nonspecific      | 0.720975 | 0.996731 | 0.849091 | 0.047054 | 882 | 479 | 403 |
| 690 Erythematc       | 0.163212 | 0.92433  | 0.413417 | 0.047393 | 813 | 16  | 797 |
| 760 Back pain        | 0.630774 | 0.99007  | 0.796462 | 0.047757 | 860 | 174 | 686 |
| 367 Disorders o      | 0.421116 | 0.971687 | 0.655058 | 0.047938 | 914 | 53  | 861 |
| 257.1 Testicular h   | 0.432494 | 0.975066 | 0.664299 | 0.049269 | 876 | 57  | 819 |
| 257 Testicular d     | 0.432494 | 0.975066 | 0.664299 | 0.049269 | 876 | 57  | 819 |
| 459 Other disor      | 0.94308  | 2.370792 | 1.567694 | 0.050607 | 875 | 17  | 858 |
| 979 Adverse dri      | 0.974441 | 1.875711 | 1.378813 | 0.051839 | 880 | 41  | 839 |
| 244 Hypothyroi       | 0.979495 | 1.689513 | 1.303465 | 0.05488  | 892 | 62  | 830 |
| 689 Disorder of      | 0.218743 | 0.957963 | 0.482814 | 0.054926 | 907 | 20  | 887 |
| 41 Bacterial in      | 0.920396 | 2.5446   | 1.620521 | 0.055497 | 924 | 11  | 913 |
| 602 Other disor      | 0.117374 | 0.926234 | 0.364273 | 0.055601 | 677 | 11  | 666 |

|        |               |          |          |          |          |     |    |     |
|--------|---------------|----------|----------|----------|----------|-----|----|-----|
| 291.8  | Alteration c  | 0.908108 | 2.731782 | 1.682294 | 0.056061 | 856 | 10 | 846 |
| 452.2  | Deep vein t   | 0.94144  | 2.088151 | 1.45944  | 0.056467 | 727 | 20 | 707 |
| 727.4  | Ganglion ar   | 0.122653 | 0.935964 | 0.369963 | 0.056884 | 723 | 12 | 711 |
| 722    | Interverteb   | 0.537546 | 0.993658 | 0.74172  | 0.056989 | 831 | 93 | 738 |
| 550    | Abdominal     | 0.538746 | 0.995755 | 0.742438 | 0.057564 | 918 | 91 | 827 |
| 78     | Viral warts   | 0.280026 | 0.978688 | 0.545775 | 0.059152 | 835 | 26 | 809 |
| 367.1  | Myopia        | 0.355398 | 0.986418 | 0.612264 | 0.06068  | 898 | 37 | 861 |
| 274    | Gout and o    | 0.972463 | 1.677777 | 1.293915 | 0.062062 | 918 | 63 | 855 |
| 565    | Anal and re   | 0.375818 | 0.990556 | 0.629843 | 0.062774 | 879 | 41 | 838 |
| 172    | Skin cancer   | 0.529297 | 1.001154 | 0.738913 | 0.063055 | 845 | 88 | 757 |
| 742    | Derangeme     | 0.260154 | 0.986572 | 0.532587 | 0.065859 | 846 | 23 | 823 |
| 599.2  | Retention c   | 0.241151 | 0.989493 | 0.51518  | 0.066845 | 772 | 20 | 752 |
| 427.7  | Tachycardia   | 0.972791 | 1.818645 | 1.334061 | 0.067786 | 420 | 71 | 349 |
| 938.2  | Chronic der   | 0.23174  | 0.995892 | 0.508217 | 0.070766 | 810 | 20 | 790 |
| 938    | Dermatitis c  | 0.23174  | 0.995892 | 0.508217 | 0.070766 | 810 | 20 | 790 |
| 790.6  | Other abno    | 0.379038 | 1.006204 | 0.637141 | 0.071506 | 879 | 39 | 840 |
| 706.2  | Sebaceous     | 0.312332 | 1.004093 | 0.583606 | 0.072193 | 867 | 28 | 839 |
| 586    | Other disor   | 0.950344 | 1.845272 | 1.349723 | 0.073594 | 849 | 45 | 804 |
| 457.3  | Encounter f   | 0.948551 | 1.787549 | 1.330515 | 0.073693 | 746 | 39 | 707 |
| 189.11 | Malignant r   | 0.883852 | 2.436482 | 1.566644 | 0.073896 | 924 | 13 | 911 |
| 395.2  | Nonrheuma     | 0.960513 | 1.672962 | 1.281292 | 0.077994 | 738 | 68 | 670 |
| 796    | Elevated pr   | 0.479933 | 1.019704 | 0.713417 | 0.079433 | 730 | 64 | 666 |
| 741.4  | Joint effusio | 0.215136 | 1.018202 | 0.497092 | 0.080212 | 841 | 18 | 823 |
| 497    | Bronchitis    | 0.844853 | 2.837161 | 1.673113 | 0.081937 | 792 | 10 | 782 |
| 250.6  | Polyneurop    | 0.921539 | 1.969722 | 1.391942 | 0.082251 | 691 | 26 | 665 |
| 173    | Neoplasm c    | 0.52323  | 1.02072  | 0.743527 | 0.082666 | 833 | 76 | 757 |
| 296.2  | Depression    | 0.95927  | 1.645706 | 1.267946 | 0.083256 | 789 | 78 | 711 |
| 854    | Complicatio   | 0.93029  | 1.869305 | 1.355293 | 0.083997 | 896 | 33 | 863 |
| 333.1  | Essential tr  | 0.128184 | 1.03784  | 0.400608 | 0.087151 | 834 | 11 | 823 |
| 561    | Symptoms i    | 0.120372 | 1.040307 | 0.388502 | 0.088948 | 717 | 10 | 707 |
| 604.3  | Peyronie's c  | 0.129575 | 1.043877 | 0.403262 | 0.091665 | 645 | 10 | 635 |
| 690.1  | Seborrheic    | 0.185996 | 1.04865  | 0.473363 | 0.093171 | 812 | 15 | 797 |
| 368.9  | Subjective \  | 0.865821 | 2.349186 | 1.515011 | 0.093783 | 871 | 12 | 859 |

|                     |          |          |          |          |     |     |     |
|---------------------|----------|----------|----------|----------|-----|-----|-----|
| 440.2 Atheroscler   | 0.912072 | 1.914849 | 1.363017 | 0.096189 | 777 | 32  | 745 |
| 459.9 Circulatory   | 0.82666  | 2.723405 | 1.628967 | 0.098262 | 868 | 10  | 858 |
| 472 Chronic pha     | 0.320213 | 1.046853 | 0.606567 | 0.099473 | 718 | 26  | 692 |
| 415.1 Acute pulm    | 0.877245 | 2.985675 | 1.662445 | 0.101529 | 731 | 19  | 712 |
| 558 Noninfectic     | 0.864301 | 2.22182  | 1.468742 | 0.101829 | 721 | 14  | 707 |
| 571 Chronic live    | 0.925369 | 1.745952 | 1.298533 | 0.102649 | 834 | 44  | 790 |
| 473 Diseases of     | 0.379643 | 1.052396 | 0.654827 | 0.105192 | 727 | 35  | 692 |
| 370 Keratitis       | 0.184349 | 1.073358 | 0.481784 | 0.106338 | 795 | 13  | 782 |
| 291 Other speci     | 0.842079 | 2.470699 | 1.539203 | 0.107217 | 858 | 12  | 846 |
| 850 Hemorrhag       | 0.827526 | 2.492832 | 1.550181 | 0.107347 | 874 | 11  | 863 |
| 366.2 Senile catar  | 0.596224 | 1.038785 | 0.79615  | 0.10756  | 896 | 112 | 784 |
| 457 Encounter f     | 0.925051 | 1.712202 | 1.28403  | 0.107665 | 751 | 44  | 707 |
| 366 Cataract        | 0.611535 | 1.0393   | 0.805626 | 0.110129 | 906 | 122 | 784 |
| 706 Diseases of     | 0.44081  | 1.054581 | 0.700638 | 0.111209 | 884 | 45  | 839 |
| 276.14 Hypopotas    | 0.908307 | 1.93064  | 1.355034 | 0.111387 | 843 | 37  | 806 |
| 722.6 Degenerati    | 0.517398 | 1.047494 | 0.751227 | 0.112783 | 806 | 68  | 738 |
| 286 Coagulator      | 0.895585 | 1.940401 | 1.356368 | 0.115269 | 733 | 32  | 701 |
| 389.1 Sensorineu    | 0.548876 | 1.050201 | 0.771725 | 0.118008 | 864 | 79  | 785 |
| 414.2 ASCVD         | 0.307236 | 1.089023 | 0.602585 | 0.119487 | 401 | 27  | 374 |
| 571.5 Other chroi   | 0.912702 | 1.736602 | 1.287239 | 0.119538 | 833 | 43  | 790 |
| 454 Varicose ve     | 0.825498 | 2.257822 | 1.468869 | 0.119788 | 719 | 12  | 707 |
| 696.42 Psoriatic ar | 0.132864 | 1.119939 | 0.42749  | 0.122804 | 784 | 11  | 773 |
| 172.2 Other non-r   | 0.542689 | 1.056465 | 0.769927 | 0.12441  | 833 | 76  | 757 |
| 348.9 Other cond    | 0.848845 | 2.208617 | 1.442624 | 0.125909 | 840 | 17  | 823 |
| 396 Abnormal h      | 0.45318  | 1.0733   | 0.714443 | 0.127393 | 720 | 50  | 670 |
| 250.22 Type 2 diab  | 0.838391 | 2.168586 | 1.430837 | 0.128051 | 680 | 15  | 665 |
| 374 Other disor     | 0.441295 | 1.072565 | 0.707778 | 0.128262 | 823 | 41  | 782 |
| 389 Hearing los     | 0.61088  | 1.050783 | 0.810616 | 0.129316 | 898 | 113 | 785 |
| 871 Open woun       | 0.367588 | 1.085459 | 0.656528 | 0.130355 | 892 | 31  | 861 |
| 371.3 Inflammatic   | 0.290515 | 1.10651  | 0.60203  | 0.138509 | 802 | 20  | 782 |
| 726.4 Calcaneal sp  | 0.188449 | 1.126141 | 0.505325 | 0.138834 | 724 | 13  | 711 |
| 381.2 Eustachian    | 0.323261 | 1.102578 | 0.627668 | 0.140023 | 865 | 24  | 841 |
| 427.4 Cardiac arr   | 0.853882 | 2.540043 | 1.50094  | 0.140102 | 370 | 21  | 349 |



|                    |          |          |          |          |     |     |     |
|--------------------|----------|----------|----------|----------|-----|-----|-----|
| 290 Delirium de    | 0.842452 | 2.260177 | 1.442014 | 0.141359 | 864 | 18  | 846 |
| 401.2 Hypertensiv  | 0.92711  | 1.691123 | 1.250671 | 0.142293 | 344 | 111 | 233 |
| 764 Sciatica       | 0.232257 | 1.140878 | 0.551058 | 0.146584 | 848 | 16  | 832 |
| 830 Dislocation    | 0.41755  | 1.095876 | 0.700272 | 0.15002  | 903 | 37  | 866 |
| 841 Sprains and    | 0.292396 | 1.124906 | 0.607101 | 0.150252 | 832 | 21  | 811 |
| 596.5 Functional   | 0.150031 | 1.188544 | 0.464888 | 0.150934 | 904 | 10  | 894 |
| 350 Abnormal r     | 0.86728  | 1.893756 | 1.326588 | 0.151634 | 911 | 28  | 883 |
| 296 Mood disor     | 0.922725 | 1.561741 | 1.210941 | 0.152325 | 799 | 88  | 711 |
| 401 Hypertensiv    | 0.950093 | 1.442857 | 1.164451 | 0.152575 | 887 | 654 | 233 |
| 289.4 Lymphader    | 0.230334 | 1.158941 | 0.552017 | 0.152761 | 859 | 16  | 843 |
| 599.5 Frequency    | 0.571103 | 1.071988 | 0.795168 | 0.154125 | 831 | 79  | 752 |
| 766 Neuralgia, r   | 0.198882 | 1.169516 | 0.523792 | 0.156972 | 845 | 13  | 832 |
| 292 Neurologic     | 0.9037   | 1.63943  | 1.237713 | 0.157662 | 902 | 56  | 846 |
| 244.4 Hypothyroi   | 0.902681 | 1.63141  | 1.234551 | 0.160161 | 886 | 56  | 830 |
| 371 Inflammatic    | 0.503761 | 1.091085 | 0.758829 | 0.162229 | 835 | 53  | 782 |
| 840 Sprains and    | 0.532455 | 1.088236 | 0.77753  | 0.168397 | 873 | 62  | 811 |
| 338.2 Chronic pai  | 0.813109 | 2.066677 | 1.37474  | 0.171789 | 886 | 17  | 869 |
| 415.11 Pulmonary   | 0.791531 | 2.914459 | 1.569263 | 0.172518 | 729 | 17  | 712 |
| 479 Other uppe     | 0.435953 | 1.118318 | 0.723093 | 0.179228 | 729 | 37  | 692 |
| 250.24 Type 2 diab | 0.872132 | 1.73954  | 1.263217 | 0.179769 | 704 | 39  | 665 |
| 512.1 Wheezing     | 0.752304 | 2.94737  | 1.575583 | 0.180888 | 408 | 11  | 397 |
| 701.2 Scar conditi | 0.15775  | 1.226516 | 0.490802 | 0.18089  | 854 | 10  | 844 |
| 401.1 Essential hy | 0.940296 | 1.430394 | 1.153454 | 0.181531 | 873 | 640 | 233 |
| 414 Other form     | 0.901441 | 1.598624 | 1.212643 | 0.18269  | 445 | 71  | 374 |
| 742.9 Other derai  | 0.28554  | 1.170443 | 0.617641 | 0.184666 | 841 | 18  | 823 |
| 803 Fracture of    | 0.78972  | 2.188529 | 1.402033 | 0.186165 | 880 | 14  | 866 |
| 427.5 Arrhythmia   | 0.9049   | 1.63223  | 1.218233 | 0.187946 | 455 | 106 | 349 |
| 600 Hyperplasia    | 0.667199 | 1.073268 | 0.853071 | 0.189623 | 820 | 154 | 666 |
| 411.2 Myocardial   | 0.922646 | 1.457668 | 1.163539 | 0.190438 | 503 | 129 | 374 |
| 464 Acute sinus    | 0.559462 | 1.096769 | 0.799017 | 0.191851 | 770 | 68  | 702 |
| 411.8 Other chroi  | 0.927699 | 1.425968 | 1.151753 | 0.194632 | 548 | 174 | 374 |
| 765 Cervical rac   | 0.353021 | 1.161168 | 0.674408 | 0.198161 | 856 | 24  | 832 |
| 721.1 Spondylosis  | 0.597864 | 1.093126 | 0.821018 | 0.200574 | 822 | 84  | 738 |

|                     |          |          |          |          |     |     |     |
|---------------------|----------|----------|----------|----------|-----|-----|-----|
| 411.3 Angina pect   | 0.628583 | 1.089327 | 0.836746 | 0.203317 | 505 | 131 | 374 |
| 564 Functional c    | 0.753029 | 2.20863  | 1.401462 | 0.205215 | 718 | 11  | 707 |
| 601 Inflammato      | 0.417712 | 1.148018 | 0.720538 | 0.206126 | 698 | 32  | 666 |
| 565.1 Anal and re   | 0.311697 | 1.188494 | 0.647519 | 0.207829 | 858 | 20  | 838 |
| 426.7 Abnormal e    | 0.50928  | 1.137135 | 0.773368 | 0.208363 | 412 | 63  | 349 |
| 433.8 Late effects  | 0.265245 | 1.227057 | 0.609532 | 0.209524 | 776 | 16  | 760 |
| 440.22 Atheroscler  | 0.80529  | 1.959088 | 1.321197 | 0.211398 | 767 | 22  | 745 |
| 772.3 Muscle wea    | 0.807876 | 1.954756 | 1.320476 | 0.211639 | 892 | 20  | 872 |
| 704 Diseases of     | 0.170757 | 1.270143 | 0.521527 | 0.211889 | 887 | 10  | 877 |
| 495 Asthma          | 0.846476 | 1.819759 | 1.271666 | 0.213517 | 822 | 40  | 782 |
| 53 Herpes zost      | 0.22658  | 1.272901 | 0.578658 | 0.219349 | 822 | 13  | 809 |
| 375.1 Dry eyes      | 0.479937 | 1.140406 | 0.762274 | 0.220383 | 845 | 43  | 802 |
| 426.31 Right bundl  | 0.803995 | 2.267157 | 1.378465 | 0.220695 | 375 | 26  | 349 |
| 783 Fever of un     | 0.855202 | 1.702217 | 1.235674 | 0.22488  | 907 | 40  | 867 |
| 596 Other disor     | 0.260821 | 1.250283 | 0.61469  | 0.228396 | 909 | 15  | 894 |
| 426.2 Atrioventric  | 0.843095 | 1.953527 | 1.292451 | 0.228682 | 397 | 48  | 349 |
| 727.1 Synovitis ar  | 0.310304 | 1.214846 | 0.656432 | 0.230488 | 731 | 20  | 711 |
| 571.51 Cirrhosis of | 0.710296 | 2.265681 | 1.400537 | 0.237852 | 800 | 10  | 790 |
| 686.1 Carbuncle a   | 0.189978 | 1.302443 | 0.553936 | 0.239654 | 833 | 11  | 822 |
| 835 Internal dei    | 0.384319 | 1.193448 | 0.711218 | 0.242722 | 892 | 26  | 866 |
| 394.1 Mitral valve  | 0.719994 | 2.481141 | 1.422353 | 0.246332 | 681 | 11  | 670 |
| 840.2 Rotator cuff  | 0.387886 | 1.194702 | 0.716175 | 0.247889 | 836 | 25  | 811 |
| 433 Cerebrovas      | 0.665968 | 1.098434 | 0.863428 | 0.249824 | 891 | 131 | 760 |
| 389.4 Tinnitus      | 0.412131 | 1.187636 | 0.731641 | 0.250577 | 815 | 30  | 785 |
| 367.2 Astigmatism   | 0.203829 | 1.313224 | 0.575706 | 0.251434 | 872 | 11  | 861 |
| 374.6 Dermatoc      | 0.427428 | 1.184644 | 0.741362 | 0.252129 | 811 | 29  | 782 |
| 721 Spondylosis     | 0.621792 | 1.113532 | 0.844324 | 0.25521  | 826 | 88  | 738 |
| 506 Empyema a       | 0.707216 | 2.356369 | 1.406312 | 0.256906 | 776 | 11  | 765 |
| 447 Other disor     | 0.820254 | 1.738292 | 1.237357 | 0.26072  | 776 | 31  | 745 |
| 601.1 Prostatitis   | 0.396488 | 1.205539 | 0.726529 | 0.263197 | 692 | 26  | 666 |
| 110.11 Dermatoph    | 0.496165 | 1.171963 | 0.784873 | 0.271342 | 874 | 43  | 831 |
| 728.7 Fasciitis     | 0.75925  | 1.989883 | 1.304189 | 0.27247  | 727 | 16  | 711 |
| 599 Other symp      | 0.681848 | 1.103018 | 0.87554  | 0.278409 | 883 | 131 | 752 |

|                     |          |          |          |          |     |     |     |
|---------------------|----------|----------|----------|----------|-----|-----|-----|
| 701 Other hype      | 0.48077  | 1.181733 | 0.778868 | 0.278625 | 884 | 40  | 844 |
| 594.3 Calculus of   | 0.333914 | 1.256954 | 0.690362 | 0.279577 | 888 | 20  | 868 |
| 475.9 Postnasal d   | 0.209377 | 1.353447 | 0.597689 | 0.285211 | 702 | 10  | 692 |
| 695.3 Rosacea       | 0.214055 | 1.377675 | 0.602216 | 0.293792 | 808 | 11  | 797 |
| 550.2 Diaphragm:    | 0.49554  | 1.189586 | 0.791563 | 0.297081 | 867 | 40  | 827 |
| 804 Fracture of     | 0.747235 | 1.994628 | 1.29233  | 0.300426 | 882 | 16  | 866 |
| 740.11 Osteoarthr   | 0.617013 | 1.135921 | 0.851222 | 0.30106  | 791 | 82  | 709 |
| 722.1 Displaceme    | 0.471573 | 1.199889 | 0.780442 | 0.301219 | 774 | 36  | 738 |
| 278.4 Abnormal v    | 0.677002 | 2.332276 | 1.376218 | 0.304575 | 753 | 13  | 740 |
| 550.1 Inguinal hei  | 0.426679 | 1.232281 | 0.756604 | 0.305495 | 855 | 28  | 827 |
| 608 Other disor     | 0.377774 | 1.256519 | 0.73042  | 0.309559 | 656 | 21  | 635 |
| 573.6 Nonspecific   | 0.375973 | 1.266708 | 0.727971 | 0.311739 | 815 | 25  | 790 |
| 241.2 Nontoxic m    | 0.689559 | 2.135026 | 1.327105 | 0.316924 | 842 | 12  | 830 |
| 172.21 Basal cell c | 0.367507 | 1.277859 | 0.727313 | 0.321603 | 778 | 21  | 757 |
| 687.4 Disturbanc    | 0.5392   | 1.180404 | 0.820253 | 0.322913 | 826 | 49  | 777 |
| 714 Rheumatoid      | 0.774576 | 1.815037 | 1.236624 | 0.323935 | 844 | 26  | 818 |
| 805 Fracture of     | 0.23452  | 1.396234 | 0.6376   | 0.331632 | 877 | 11  | 866 |
| 386 Vertiginous     | 0.364256 | 1.297791 | 0.728337 | 0.33175  | 793 | 21  | 772 |
| 261.2 Vitamin B-c   | 0.713525 | 2.029374 | 1.29117  | 0.332147 | 864 | 17  | 847 |
| 871.2 Open woun     | 0.235299 | 1.413412 | 0.638505 | 0.337227 | 872 | 11  | 861 |
| 743 Osteoporos      | 0.574806 | 1.174814 | 0.839735 | 0.339081 | 923 | 60  | 863 |
| 381.1 Otitis medi   | 0.344163 | 1.308655 | 0.721851 | 0.345175 | 859 | 18  | 841 |
| 380.4 Impacted c    | 0.534337 | 1.199334 | 0.823593 | 0.348192 | 890 | 44  | 846 |
| 726.1 Enthesopat    | 0.524198 | 1.207751 | 0.821268 | 0.356538 | 754 | 43  | 711 |
| 743.9 Osteopenia    | 0.459746 | 1.255097 | 0.789805 | 0.359139 | 894 | 31  | 863 |
| 288 Diseases of     | 0.705673 | 2.093714 | 1.283279 | 0.365368 | 861 | 18  | 843 |
| 442.11 Abdominal    | 0.718107 | 1.942517 | 1.249841 | 0.375301 | 765 | 20  | 745 |
| 110 Dermatoph       | 0.568711 | 1.197575 | 0.845343 | 0.377793 | 885 | 54  | 831 |
| 427.9 Palpitations  | 0.691984 | 1.146983 | 0.894318 | 0.384809 | 547 | 198 | 349 |
| 871.1 Open woun     | 0.269406 | 1.432519 | 0.686017 | 0.386028 | 873 | 12  | 861 |
| 110.1 Dermatoph     | 0.56776  | 1.203492 | 0.847107 | 0.387976 | 884 | 53  | 831 |
| 418.1 Precordial p  | 0.416811 | 1.29737  | 0.779626 | 0.393384 | 428 | 25  | 403 |
| 198 Secondary i     | 0.718991 | 1.841898 | 1.22113  | 0.400065 | 858 | 20  | 838 |

|                     |          |          |          |          |     |     |     |
|---------------------|----------|----------|----------|----------|-----|-----|-----|
| 593 Hematuria       | 0.811421 | 1.555984 | 1.148678 | 0.401904 | 865 | 49  | 816 |
| 573.7 Abnormal r    | 0.545188 | 1.22522  | 0.840782 | 0.403433 | 840 | 50  | 790 |
| 740.1 Osteoarthri   | 0.655044 | 1.162206 | 0.885572 | 0.405872 | 799 | 90  | 709 |
| 743.1 Osteoporos    | 0.450708 | 1.295314 | 0.801097 | 0.413415 | 891 | 28  | 863 |
| 586.2 Cyst of kidn  | 0.685175 | 2.017448 | 1.24932  | 0.415954 | 822 | 18  | 804 |
| 427.6 Premature     | 0.557603 | 1.252387 | 0.847743 | 0.421604 | 409 | 60  | 349 |
| 269 Proteinuria     | 0.664263 | 2.001981 | 1.24829  | 0.425427 | 925 | 14  | 911 |
| 603 Other disor     | 0.267442 | 1.483137 | 0.701996 | 0.426156 | 646 | 11  | 635 |
| 250.1 Type 1 diab   | 0.471893 | 1.295236 | 0.817147 | 0.437479 | 695 | 30  | 665 |
| 361 Retinal deta    | 0.31437  | 1.430419 | 0.740434 | 0.442717 | 845 | 13  | 832 |
| 426.21 First degree | 0.257791 | 1.617448 | 0.702666 | 0.449793 | 361 | 12  | 349 |
| 714.1 Rheumatoi     | 0.673083 | 1.923772 | 1.219667 | 0.452963 | 834 | 16  | 818 |
| 261 Vitamin def     | 0.607338 | 1.212181 | 0.876302 | 0.454743 | 910 | 63  | 847 |
| 569 Other disor     | 0.778484 | 1.580717 | 1.142576 | 0.458087 | 877 | 39  | 838 |
| 560 Intestinal o    | 0.245265 | 1.553693 | 0.699271 | 0.458803 | 717 | 10  | 707 |
| 425.11 Hypertroph   | 0.342737 | 1.447522 | 0.75939  | 0.460265 | 778 | 17  | 761 |
| 340 Migraine        | 0.371761 | 1.401572 | 0.777252 | 0.462692 | 916 | 18  | 898 |
| 427.11 Paroxysmal   | 0.753841 | 1.757112 | 1.168282 | 0.468903 | 395 | 46  | 349 |
| 476 Allergic rhir   | 0.682604 | 1.171415 | 0.905838 | 0.472478 | 787 | 95  | 692 |
| 371.2 Conjunctivi   | 0.487962 | 1.316737 | 0.835565 | 0.479511 | 809 | 27  | 782 |
| 809 Fracture of     | 0.260545 | 1.557832 | 0.721254 | 0.482513 | 876 | 10  | 866 |
| 246 Other disor     | 0.594479 | 2.092379 | 1.247114 | 0.485292 | 841 | 11  | 830 |
| 573 Other disor     | 0.408499 | 1.385862 | 0.802565 | 0.485502 | 811 | 21  | 790 |
| 743.11 Osteoporos   | 0.381161 | 1.420201 | 0.789971 | 0.486403 | 881 | 18  | 863 |
| 579 Other symp      | 0.437513 | 1.353721 | 0.817298 | 0.487415 | 819 | 23  | 796 |
| 261.4 Vitamin D c   | 0.589093 | 1.243505 | 0.8776   | 0.494345 | 900 | 53  | 847 |
| 772.2 Spasm of m    | 0.34957  | 1.462571 | 0.780733 | 0.503062 | 887 | 15  | 872 |
| 411.1 Unstable ar   | 0.837508 | 1.400297 | 1.090771 | 0.504684 | 500 | 126 | 374 |
| 379 Other disor     | 0.62313  | 1.224072 | 0.891408 | 0.504707 | 862 | 60  | 802 |
| 519.9 Symptoms i    | 0.699969 | 1.743282 | 1.164445 | 0.509886 | 913 | 22  | 891 |
| 519 Other disea     | 0.699969 | 1.743282 | 1.164445 | 0.509886 | 913 | 22  | 891 |
| 362.3 Other nond    | 0.633945 | 1.928371 | 1.202728 | 0.510183 | 836 | 13  | 823 |
| 411.4 Coronary at   | 0.892044 | 1.259406 | 1.058516 | 0.516486 | 825 | 451 | 374 |

|                     |          |          |          |          |     |     |     |
|---------------------|----------|----------|----------|----------|-----|-----|-----|
| 771 Musculoske      | 0.633284 | 1.915903 | 1.196721 | 0.521233 | 882 | 15  | 867 |
| 371.21 Allergic con | 0.428701 | 1.401848 | 0.82286  | 0.521451 | 801 | 19  | 782 |
| 521.1 Dental carie  | 0.315523 | 1.522502 | 0.772051 | 0.527075 | 909 | 13  | 896 |
| 740.9 Osteoarthr    | 0.711786 | 1.172045 | 0.923071 | 0.528622 | 828 | 119 | 709 |
| 601.11 Acute prost  | 0.285814 | 1.565052 | 0.759171 | 0.532256 | 676 | 10  | 666 |
| 274.11 Gouty arthr  | 0.676258 | 1.78392  | 1.16428  | 0.536348 | 876 | 21  | 855 |
| 287.3 Thrombocy     | 0.599634 | 2.063202 | 1.213031 | 0.539026 | 716 | 15  | 701 |
| 287 Purpura an      | 0.599634 | 2.063202 | 1.213031 | 0.539026 | 716 | 15  | 701 |
| 591 Urinary trac    | 0.593924 | 1.264325 | 0.889447 | 0.543993 | 864 | 48  | 816 |
| 279.1 Immunity d    | 0.740187 | 1.588629 | 1.122258 | 0.552419 | 925 | 35  | 890 |
| 292.1 Aphasia/sp    | 0.298762 | 1.644669 | 0.77048  | 0.553077 | 857 | 11  | 846 |
| 747 Cardiac anc     | 0.581951 | 1.275025 | 0.888174 | 0.554137 | 922 | 45  | 877 |
| 747.1 Cardiac con   | 0.581951 | 1.275025 | 0.888174 | 0.554137 | 922 | 45  | 877 |
| 381.11 Suppurativ   | 0.366441 | 1.482566 | 0.807968 | 0.554451 | 855 | 14  | 841 |
| 535 Gastritis an    | 0.66185  | 1.800313 | 1.161582 | 0.555478 | 894 | 20  | 874 |
| 530.14 Reflux esop  | 0.343886 | 1.514534 | 0.79699  | 0.55697  | 687 | 14  | 673 |
| 411 Ischemic He     | 0.889554 | 1.245293 | 1.050944 | 0.56124  | 873 | 499 | 374 |
| 939 Atopic/cont     | 0.514135 | 1.345532 | 0.866845 | 0.562548 | 821 | 31  | 790 |
| 594 Urinary calc    | 0.615071 | 1.255645 | 0.900326 | 0.564768 | 924 | 56  | 868 |
| 286.7 Other and t   | 0.643849 | 1.850619 | 1.165887 | 0.565391 | 722 | 21  | 701 |
| 242 Thyrotoxicc     | 0.559533 | 2.108859 | 1.212649 | 0.567105 | 841 | 11  | 830 |
| 302 Sexual and      | 0.408246 | 1.487374 | 0.828511 | 0.57133  | 730 | 19  | 711 |
| 594.1 Calculus of   | 0.593395 | 1.276856 | 0.895388 | 0.57286  | 916 | 48  | 868 |
| 333 Extrapryram     | 0.441962 | 1.44029  | 0.843109 | 0.57321  | 844 | 21  | 823 |
| 747.12 Valvular he  | 0.591857 | 1.958824 | 1.184701 | 0.574838 | 890 | 13  | 877 |
| 599.4 Urinary inc   | 0.424554 | 1.462315 | 0.8385   | 0.579076 | 770 | 18  | 752 |
| 743.13 Other speci  | 0.331655 | 1.571498 | 0.80317  | 0.588021 | 876 | 13  | 863 |
| 530 Diseases of     | 0.769207 | 1.15127  | 0.946721 | 0.593721 | 867 | 194 | 673 |
| 512.8 Cough         | 0.833731 | 1.361474 | 1.068381 | 0.595119 | 571 | 174 | 397 |
| 241 Nontoxic ne     | 0.617242 | 1.85023  | 1.154732 | 0.605764 | 846 | 16  | 830 |
| 578.8 Hemorrhag     | 0.487902 | 1.39223  | 0.870971 | 0.60792  | 821 | 25  | 796 |
| 365.1 Open-angle    | 0.486692 | 1.406385 | 0.870199 | 0.608653 | 856 | 24  | 832 |
| 550.4 Umbilical h   | 0.394136 | 1.517916 | 0.837396 | 0.609103 | 842 | 15  | 827 |

|                    |          |          |          |          |     |     |     |
|--------------------|----------|----------|----------|----------|-----|-----|-----|
| 521 Diseases of    | 0.359392 | 1.547329 | 0.82417  | 0.60916  | 910 | 14  | 896 |
| 172.22 Squamous c  | 0.395719 | 1.525167 | 0.837142 | 0.609539 | 773 | 16  | 757 |
| 382 Otagia         | 0.310588 | 1.662767 | 0.801068 | 0.610145 | 851 | 10  | 841 |
| 593.1 Gross hema   | 0.63125  | 1.818787 | 1.146967 | 0.6102   | 833 | 17  | 816 |
| 599.9 Other abno   | 0.547378 | 1.340754 | 0.891546 | 0.616327 | 783 | 31  | 752 |
| 228 Hemangion      | 0.564313 | 1.990939 | 1.170608 | 0.619319 | 915 | 11  | 904 |
| 379.2 Disorders o  | 0.623884 | 1.280259 | 0.915206 | 0.629179 | 853 | 51  | 802 |
| 250.3 Insulin pum  | 0.625426 | 1.782686 | 1.136029 | 0.631125 | 683 | 18  | 665 |
| 447.7 Aortic ectas | 0.660498 | 1.693257 | 1.121194 | 0.631656 | 768 | 23  | 745 |
| 696.4 Psoriasis    | 0.49578  | 1.417321 | 0.879326 | 0.632738 | 802 | 29  | 773 |
| 696 Psoriasis an   | 0.49578  | 1.417321 | 0.879326 | 0.632738 | 802 | 29  | 773 |
| 304 Adjustment     | 0.450268 | 1.511117 | 0.866499 | 0.64417  | 733 | 22  | 711 |
| 362.9 Retinal ede  | 0.547926 | 2.008356 | 1.161475 | 0.647126 | 833 | 10  | 823 |
| 530.11 GERD        | 0.761986 | 1.17107  | 0.951454 | 0.649133 | 841 | 168 | 673 |
| 362 Other retin    | 0.625409 | 1.290058 | 0.920395 | 0.653494 | 872 | 49  | 823 |
| 574.1 Cholelithias | 0.652675 | 1.713168 | 1.115273 | 0.656562 | 913 | 22  | 891 |
| 279 Disorders ir   | 0.717788 | 1.548263 | 1.090874 | 0.656595 | 926 | 36  | 890 |
| 483 Acute bron     | 0.736667 | 1.519313 | 1.08474  | 0.65816  | 836 | 47  | 789 |
| 293.1 Swelling, m  | 0.623969 | 1.77557  | 1.123748 | 0.660542 | 918 | 19  | 899 |
| 296.1 Bipolar      | 0.302416 | 1.796314 | 0.817158 | 0.660887 | 722 | 11  | 711 |
| 250.4 Abnormal g   | 0.67411  | 1.247911 | 0.934038 | 0.663786 | 740 | 75  | 665 |
| 276.5 Hypovolem    | 0.646979 | 1.774997 | 1.115159 | 0.672031 | 833 | 27  | 806 |
| 575 Other biliar   | 0.56561  | 1.892322 | 1.138146 | 0.672134 | 904 | 13  | 891 |
| 751 Genitourina    | 0.519679 | 2.011018 | 1.145496 | 0.693203 | 923 | 11  | 912 |
| 585.33 Chronic Kid | 0.473373 | 1.498212 | 0.88951  | 0.693359 | 827 | 23  | 804 |
| 687.1 Rash and of  | 0.581322 | 1.356865 | 0.920706 | 0.702999 | 813 | 36  | 777 |
| 250.42 Other abno  | 0.573834 | 1.362778 | 0.919329 | 0.70379  | 700 | 35  | 665 |
| 741 Symptoms       | 0.670907 | 1.267287 | 0.940444 | 0.705066 | 888 | 65  | 823 |
| 429.3 Symptoms     | 0.43322  | 1.592395 | 0.883181 | 0.710671 | 609 | 20  | 589 |
| 530.1 Esophagitis  | 0.777515 | 1.175356 | 0.962139 | 0.71357  | 854 | 181 | 673 |
| 401.21 Hypertensin | 0.745051 | 1.514175 | 1.067978 | 0.714946 | 326 | 93  | 233 |
| 740 Osteoarthro    | 0.78043  | 1.174192 | 0.963149 | 0.717957 | 889 | 180 | 709 |
| 290.1 Dementias    | 0.52154  | 2.105032 | 1.136739 | 0.719076 | 858 | 12  | 846 |

|                     |          |          |          |          |     |     |     |
|---------------------|----------|----------|----------|----------|-----|-----|-----|
| 327.7 Sleep relate  | 0.401791 | 1.614122 | 0.880471 | 0.723224 | 691 | 15  | 676 |
| 578.2 Blood in stc  | 0.657576 | 1.614279 | 1.082695 | 0.727761 | 821 | 25  | 796 |
| 681.5 Cellulitis an | 0.584014 | 1.788317 | 1.100676 | 0.735813 | 837 | 15  | 822 |
| 681 Superficial c   | 0.641531 | 1.308315 | 0.940506 | 0.735845 | 871 | 49  | 822 |
| 250.41 Impaired fa  | 0.595023 | 1.360051 | 0.9313   | 0.736483 | 706 | 41  | 665 |
| 785 Abdominal       | 0.775377 | 1.184491 | 0.96443  | 0.737072 | 884 | 167 | 717 |
| 296.22 Major depr   | 0.48297  | 1.568604 | 0.911813 | 0.75876  | 733 | 22  | 711 |
| 470 Septal Devi     | 0.618359 | 1.349403 | 0.941365 | 0.761677 | 732 | 40  | 692 |
| 165.1 Cancer of b   | 0.332135 | 1.766935 | 0.877364 | 0.763437 | 935 | 10  | 925 |
| 716.9 Arthropath    | 0.576308 | 1.405502 | 0.933586 | 0.763471 | 867 | 35  | 832 |
| 763 Thoracic or     | 0.496522 | 1.499948 | 0.919001 | 0.766196 | 853 | 21  | 832 |
| 475 Chronic sinu    | 0.649732 | 1.317635 | 0.947968 | 0.767028 | 741 | 49  | 692 |
| 595 Hydroneph       | 0.420725 | 1.622125 | 0.902903 | 0.769811 | 883 | 15  | 868 |
| 386.2 Peripheral c  | 0.379219 | 1.753231 | 0.891844 | 0.772292 | 784 | 12  | 772 |
| 198.1 Secondary i   | 0.533604 | 1.842364 | 1.09365  | 0.77661  | 851 | 13  | 838 |
| 327.71 Restless leg | 0.483933 | 2.000304 | 1.108086 | 0.776783 | 687 | 11  | 676 |
| 716 Other arthr     | 0.585176 | 1.401572 | 0.938585 | 0.776886 | 868 | 36  | 832 |
| 165 Cancer with     | 0.355939 | 1.753905 | 0.892251 | 0.783188 | 936 | 11  | 925 |
| 227 Benign neo      | 0.373223 | 1.747116 | 0.896992 | 0.784457 | 925 | 11  | 914 |
| 528 Diseases of     | 0.548637 | 1.823064 | 1.087041 | 0.785721 | 912 | 15  | 897 |
| 495.2 Asthma wit    | 0.358525 | 1.824768 | 0.899047 | 0.801504 | 795 | 13  | 782 |
| 593.2 Microscopic   | 0.556706 | 1.768829 | 1.076156 | 0.803185 | 831 | 15  | 816 |
| 720 Spinal stenc    | 0.689625 | 1.48922  | 1.046688 | 0.815725 | 775 | 37  | 738 |
| 380.1 Otitis exter  | 0.405071 | 1.679469 | 0.920131 | 0.820454 | 858 | 12  | 846 |
| 429.2 Abnormal f    | 0.666126 | 1.347919 | 0.960918 | 0.824353 | 662 | 73  | 589 |
| 427.41 Ventricular  | 0.512967 | 2.092668 | 1.081779 | 0.824887 | 364 | 15  | 349 |
| 735 Acquired fo     | 0.65301  | 1.555905 | 1.049216 | 0.828366 | 884 | 30  | 854 |
| 585.4 Chronic kid   | 0.398417 | 1.744194 | 0.921074 | 0.830305 | 817 | 13  | 804 |
| 751.21 Cystic kidne | 0.46005  | 1.991399 | 1.083566 | 0.83033  | 922 | 10  | 912 |
| 751.2 Congenital    | 0.46005  | 1.991399 | 1.083566 | 0.83033  | 922 | 10  | 912 |
| 537 Other disor     | 0.50479  | 1.862482 | 1.071031 | 0.837498 | 887 | 13  | 874 |
| 726.3 Bursitis      | 0.436382 | 1.639315 | 0.933519 | 0.839175 | 724 | 13  | 711 |
| 275.5 Disorders o   | 0.535602 | 1.809504 | 1.06408  | 0.841907 | 908 | 15  | 893 |

|        |               |          |          |          |          |     |     |     |
|--------|---------------|----------|----------|----------|----------|-----|-----|-----|
| 185    | Cancer of p   | 0.653766 | 1.356991 | 0.963991 | 0.8439   | 718 | 52  | 666 |
| 338.1  | Acute pain    | 0.623705 | 1.584559 | 1.047238 | 0.845813 | 895 | 26  | 869 |
| 433.31 | Transient c   | 0.72285  | 1.412992 | 1.033647 | 0.846262 | 814 | 54  | 760 |
| 327    | Sleep disor   | 0.755303 | 1.361823 | 1.029043 | 0.848659 | 757 | 81  | 676 |
| 429    | Ill-defined c | 0.719468 | 1.291255 | 0.97228  | 0.850207 | 698 | 109 | 589 |
| 369    | Infection of  | 0.522464 | 1.530942 | 0.950218 | 0.852695 | 802 | 20  | 782 |
| 368    | Visual distu  | 0.643066 | 1.372329 | 0.965344 | 0.855366 | 903 | 44  | 859 |
| 401.3  | Other hype    | 0.505988 | 1.664139 | 0.947002 | 0.857215 | 261 | 28  | 233 |
| 695    | Erythematc    | 0.494027 | 1.593116 | 0.948037 | 0.858921 | 816 | 19  | 797 |
| 345.3  | Convulsion:   | 0.483993 | 1.925803 | 1.064785 | 0.85914  | 835 | 12  | 823 |
| 770    | Myalgia and   | 0.634989 | 1.559777 | 1.039981 | 0.864391 | 911 | 30  | 881 |
| 531    | Peptic ulcer  | 0.427089 | 1.702139 | 0.941578 | 0.865698 | 925 | 13  | 912 |
| 514.2  | Solitary pul  | 0.516905 | 1.826944 | 1.054299 | 0.87028  | 905 | 16  | 889 |
| 433.21 | Cerebral ar   | 0.62996  | 1.569713 | 1.038047 | 0.87282  | 788 | 28  | 760 |
| 327.4  | Insomnia      | 0.651775 | 1.524712 | 1.033991 | 0.877396 | 713 | 37  | 676 |
| 442    | Other aneu    | 0.676441 | 1.478223 | 1.030386 | 0.880704 | 787 | 42  | 745 |
| 574.12 | Cholelithias  | 0.383768 | 1.824595 | 0.942112 | 0.881958 | 901 | 10  | 891 |
| 292.3  | Memory lo:    | 0.554647 | 1.544027 | 0.963684 | 0.887695 | 873 | 27  | 846 |
| 365.11 | Primary op    | 0.472444 | 1.972228 | 1.051279 | 0.89059  | 844 | 12  | 832 |
| 741.2  | Stiffness of  | 0.461822 | 1.643076 | 0.956154 | 0.890685 | 838 | 15  | 823 |
| 172.11 | Melanomas     | 0.531274 | 1.704591 | 1.038252 | 0.898092 | 771 | 14  | 757 |
| 727.6  | Rupture of    | 0.518305 | 1.804984 | 1.038545 | 0.904961 | 724 | 13  | 711 |
| 916    | Contusion     | 0.548506 | 1.541581 | 0.969042 | 0.905303 | 909 | 23  | 886 |
| 362.29 | Macular de    | 0.423125 | 2.059693 | 1.048688 | 0.906596 | 833 | 10  | 823 |
| 272.12 | Hyperglyce    | 0.526792 | 1.563736 | 0.968156 | 0.90677  | 275 | 19  | 256 |
| 362.2  | Degenerati    | 0.58705  | 1.487547 | 0.972928 | 0.907945 | 851 | 28  | 823 |
| 532    | Dysphagia     | 0.699597 | 1.41148  | 1.0208   | 0.908278 | 720 | 47  | 673 |
| 362.26 | Macular pu    | 0.474373 | 1.661471 | 0.964592 | 0.910433 | 837 | 14  | 823 |
| 362.23 | Cystoid ma    | 0.431079 | 1.746378 | 0.961089 | 0.91158  | 834 | 11  | 823 |
| 735.2  | Acquired tc   | 0.469391 | 1.682461 | 0.964248 | 0.91178  | 869 | 15  | 854 |
| 578    | Gastrointes   | 0.714232 | 1.383337 | 1.017786 | 0.916574 | 849 | 53  | 796 |
| 368.2  | Diplopia an   | 0.445726 | 1.750921 | 0.964616 | 0.918293 | 872 | 13  | 859 |
| 244.1  | Secondary l   | 0.48304  | 1.810409 | 1.034578 | 0.920205 | 843 | 13  | 830 |



|                     |          |          |          |          |     |     |     |
|---------------------|----------|----------|----------|----------|-----|-----|-----|
| 696.41 Psoriasis vu | 0.550802 | 1.690729 | 1.028521 | 0.921789 | 794 | 21  | 773 |
| 351 Other perip     | 0.631388 | 1.416648 | 0.97999  | 0.921952 | 878 | 37  | 841 |
| 747.11 Cardiac shu  | 0.610472 | 1.547651 | 1.022089 | 0.926612 | 903 | 26  | 877 |
| 302.1 Decreased l   | 0.507948 | 1.803307 | 1.029805 | 0.927744 | 727 | 16  | 711 |
| 433.3 Cerebral isc  | 0.717912 | 1.376554 | 1.01482  | 0.929318 | 819 | 59  | 760 |
| 599.3 Dysuria       | 0.550356 | 1.547956 | 0.977442 | 0.931237 | 773 | 21  | 752 |
| 536 Disorders o     | 0.522406 | 1.588234 | 0.976216 | 0.932706 | 893 | 19  | 874 |
| 536.8 Dyspepsia a   | 0.522406 | 1.588234 | 0.976216 | 0.932706 | 893 | 19  | 874 |
| 172.1 Melanomas     | 0.54834  | 1.544833 | 0.982001 | 0.944622 | 777 | 20  | 757 |
| 285 Other anen      | 0.555057 | 1.636316 | 1.019366 | 0.944718 | 909 | 20  | 889 |
| 427.3 Other speci   | 0.711787 | 1.414297 | 1.01158  | 0.947407 | 429 | 80  | 349 |
| 740.2 Osteoarthr    | 0.485818 | 1.663086 | 0.979601 | 0.947839 | 724 | 15  | 709 |
| 365 Glaucoma        | 0.638955 | 1.427806 | 0.986756 | 0.948156 | 868 | 36  | 832 |
| 788 Syncope an      | 0.787535 | 1.260374 | 1.005699 | 0.962132 | 915 | 122 | 793 |
| 741.3 Difficulty in | 0.457512 | 1.852698 | 1.01536  | 0.966135 | 835 | 12  | 823 |
| 70 Viral hepati     | 0.416068 | 1.832788 | 0.98468  | 0.967716 | 820 | 11  | 809 |
| 70.3 Viral hepati   | 0.416068 | 1.832788 | 0.98468  | 0.967716 | 820 | 11  | 809 |
| 720.1 Spinal stenc  | 0.610929 | 1.522524 | 1.00878  | 0.97     | 765 | 27  | 738 |
| 433.2 Occlusion o   | 0.605127 | 1.498632 | 0.99137  | 0.970195 | 790 | 30  | 760 |
| 789 Nausea anc      | 0.647096 | 1.469433 | 1.007308 | 0.972252 | 907 | 38  | 869 |
| 455 Hemorrhoid      | 0.722364 | 1.342553 | 1.005421 | 0.972657 | 773 | 66  | 707 |
| 442.1 Aortic aneu   | 0.632033 | 1.458944 | 0.993132 | 0.974293 | 783 | 38  | 745 |
| 292.2 Mild cognit   | 0.407911 | 2.084831 | 1.012867 | 0.975608 | 856 | 10  | 846 |
| 356 Hereditary      | 0.651159 | 1.447704 | 1.005447 | 0.978729 | 911 | 37  | 874 |
| 801 Fracture of     | 0.413139 | 1.897565 | 1.010297 | 0.979183 | 876 | 10  | 866 |
| 550.6 Incisional h  | 0.468688 | 1.816966 | 1.008665 | 0.980128 | 839 | 12  | 827 |
| 429.9 Cardiac con   | 0.463377 | 1.852792 | 0.992238 | 0.982576 | 606 | 17  | 589 |
| 574 Cholelithias    | 0.593788 | 1.539516 | 1.003789 | 0.987597 | 917 | 26  | 891 |
| 316 Substance a     | 0.392687 | 1.86419  | 0.994597 | 0.989151 | 783 | 10  | 773 |
| 275 Disorders o     | 0.619777 | 1.491345 | 0.998037 | 0.993011 | 925 | 32  | 893 |
| 345 Epilepsy, re    | 0.55032  | 1.625089 | 1.002417 | 0.993059 | 845 | 22  | 823 |
| 735.21 Hammer to    | 0.452973 | 1.825781 | 1.002588 | 0.994256 | 866 | 12  | 854 |
| 300.4 Dysthymic c   | 0.388694 | 2.033681 | 0.997493 | 0.995306 | 721 | 10  | 711 |

|                      |          |          |          |          |     |    |                                     |
|----------------------|----------|----------|----------|----------|-----|----|-------------------------------------|
| 433.1 Occlusion a    | 0.725221 | 1.334013 | 0.999936 | 0.999669 | 831 | 71 | 760                                 |
| 41.4 E. coli         | NA       | NA       | NA       | NA       | 914 | 1  | 913 [Error: < 10 cases or controls] |
| 710.12 Chronic ost   | NA       | NA       | NA       | NA       | 833 | 1  | 832 [Error: < 10 cases or controls] |
| 802 Fracture of      | NA       | NA       | NA       | NA       | 867 | 1  | 866 [Error: < 10 cases or controls] |
| 872 Traumatic ε      | NA       | NA       | NA       | NA       | 862 | 1  | 861 [Error: < 10 cases or controls] |
| 136 Other infec      | NA       | NA       | NA       | NA       | 930 | 1  | 929 [Error: < 10 cases or controls] |
| 346.2 Nonspecific    | NA       | NA       | NA       | NA       | 824 | 1  | 823 [Error: < 10 cases or controls] |
| 334.1 Spinocereb     | NA       | NA       | NA       | NA       | 824 | 1  | 823 [Error: < 10 cases or controls] |
| 327.72 Sleep relatε  | NA       | NA       | NA       | NA       | 677 | 1  | 676 [Error: < 10 cases or controls] |
| 358 Myoneural        | NA       | NA       | NA       | NA       | 875 | 1  | 874 [Error: < 10 cases or controls] |
| 686.3 Pilonidal cy   | NA       | NA       | NA       | NA       | 823 | 1  | 822 [Error: < 10 cases or controls] |
| 279.2 Autoimmun      | NA       | NA       | NA       | NA       | 891 | 1  | 890 [Error: < 10 cases or controls] |
| 362.1 Retinopath     | NA       | NA       | NA       | NA       | 824 | 1  | 823 [Error: < 10 cases or controls] |
| 528.12 Oral aphthε   | NA       | NA       | NA       | NA       | 898 | 1  | 897 [Error: < 10 cases or controls] |
| 110.2 Dermatomy      | NA       | NA       | NA       | NA       | 832 | 1  | 831 [Error: < 10 cases or controls] |
| 362.5 Toxic macu     | NA       | NA       | NA       | NA       | 824 | 1  | 823 [Error: < 10 cases or controls] |
| 480.13 MRSA pneu     | NA       | NA       | NA       | NA       | 790 | 1  | 789 [Error: < 10 cases or controls] |
| 656 Other perin      | NA       | NA       | NA       | NA       | 937 | 1  | 936 [Error: < 10 cases or controls] |
| 303.3 Psychogeni     | NA       | NA       | NA       | NA       | 712 | 1  | 711 [Error: < 10 cases or controls] |
| 364.41 Keratoconu    | NA       | NA       | NA       | NA       | 833 | 1  | 832 [Error: < 10 cases or controls] |
| 604.2 Vascular di    | NA       | NA       | NA       | NA       | 636 | 1  | 635 [Error: < 10 cases or controls] |
| 292.6 Hallucinatic   | NA       | NA       | NA       | NA       | 847 | 1  | 846 [Error: < 10 cases or controls] |
| 270.34 Alpha-1-ani   | NA       | NA       | NA       | NA       | 912 | 1  | 911 [Error: < 10 cases or controls] |
| 204.2 Myeloid leu    | NA       | NA       | NA       | NA       | 928 | 1  | 927 [Error: < 10 cases or controls] |
| 444.5 Atheroemb      | NA       | NA       | NA       | NA       | 746 | 1  | 745 [Error: < 10 cases or controls] |
| 261.41 Ricketts or c | NA       | NA       | NA       | NA       | 848 | 1  | 847 [Error: < 10 cases or controls] |
| 695.41 Cutaneous     | NA       | NA       | NA       | NA       | 794 | 1  | 793 [Error: < 10 cases or controls] |
| 246.2 Thyroid cys    | NA       | NA       | NA       | NA       | 831 | 1  | 830 [Error: < 10 cases or controls] |
| 229.1 Benign neo     | NA       | NA       | NA       | NA       | 936 | 1  | 935 [Error: < 10 cases or controls] |
| 740.3 Osteoarthr     | NA       | NA       | NA       | NA       | 710 | 1  | 709 [Error: < 10 cases or controls] |
| 750.14 Congenital    | NA       | NA       | NA       | NA       | 913 | 1  | 912 [Error: < 10 cases or controls] |
| 567 Peritonitis ε    | NA       | NA       | NA       | NA       | 839 | 1  | 838 [Error: < 10 cases or controls] |
| 337.1 Peripheral ε   | NA       | NA       | NA       | NA       | 824 | 1  | 823 [Error: < 10 cases or controls] |

|                    |    |    |    |     |   |                                     |
|--------------------|----|----|----|-----|---|-------------------------------------|
| 610.4 Benign neo   | NA | NA | NA | 921 | 1 | 920 [Error: < 10 cases or controls] |
| 198.7 Secondary i  | NA | NA | NA | 839 | 1 | 838 [Error: < 10 cases or controls] |
| 756.3 Congenital   | NA | NA | NA | 924 | 1 | 923 [Error: < 10 cases or controls] |
| 750.21 Congenital  | NA | NA | NA | 913 | 1 | 912 [Error: < 10 cases or controls] |
| 301.2 Antisocial/t | NA | NA | NA | 712 | 1 | 711 [Error: < 10 cases or controls] |
| 911 Blister        | NA | NA | NA | 935 | 1 | 934 [Error: < 10 cases or controls] |
| 379.51 Pigmentary  | NA | NA | NA | 803 | 1 | 802 [Error: < 10 cases or controls] |
| 528.4 Cysts of ora | NA | NA | NA | 898 | 1 | 897 [Error: < 10 cases or controls] |
| 575.2 Obstructior  | NA | NA | NA | 892 | 1 | 891 [Error: < 10 cases or controls] |
| 277.6 Other defic  | NA | NA | NA | 898 | 1 | 897 [Error: < 10 cases or controls] |
| 800.4 Fracture of  | NA | NA | NA | 867 | 1 | 866 [Error: < 10 cases or controls] |
| 337 Disorders o    | NA | NA | NA | 824 | 1 | 823 [Error: < 10 cases or controls] |
| 229 Benign neo     | NA | NA | NA | 936 | 1 | 935 [Error: < 10 cases or controls] |
| 597.1 Urethral str | NA | NA | NA | 895 | 1 | 894 [Error: < 10 cases or controls] |
| 989 Toxic effect   | NA | NA | NA | 933 | 1 | 932 [Error: < 10 cases or controls] |
| 376 Disorders o    | NA | NA | NA | 803 | 1 | 802 [Error: < 10 cases or controls] |
| 592.2 Urethritis a | NA | NA | NA | 817 | 1 | 816 [Error: < 10 cases or controls] |
| 695.21 Dermatitis  | NA | NA | NA | 798 | 1 | 797 [Error: < 10 cases or controls] |
| 732.1 Juvenile ost | NA | NA | NA | 831 | 1 | 830 [Error: < 10 cases or controls] |
| 509.5 Respiratory  | NA | NA | NA | 766 | 1 | 765 [Error: < 10 cases or controls] |
| 694.1 Vitiligo     | NA | NA | NA | 798 | 1 | 797 [Error: < 10 cases or controls] |
| 750.1 Upper gast   | NA | NA | NA | 913 | 1 | 912 [Error: < 10 cases or controls] |
| 370.1 Corneal ulc  | NA | NA | NA | 783 | 1 | 782 [Error: < 10 cases or controls] |
| 870.4 Open woun    | NA | NA | NA | 862 | 1 | 861 [Error: < 10 cases or controls] |
| 70.1 Viral hepati  | NA | NA | NA | 810 | 1 | 809 [Error: < 10 cases or controls] |
| 281.9 Deficiency ; | NA | NA | NA | 890 | 1 | 889 [Error: < 10 cases or controls] |
| 573.1 Chronic pas  | NA | NA | NA | 791 | 1 | 790 [Error: < 10 cases or controls] |
| 598.4 Other cells  | NA | NA | NA | 934 | 1 | 933 [Error: < 10 cases or controls] |
| 586.3 Vascular dis | NA | NA | NA | 805 | 1 | 804 [Error: < 10 cases or controls] |
| 253.7 Other disor  | NA | NA | NA | 820 | 1 | 819 [Error: < 10 cases or controls] |
| 501 Pneumoniti     | NA | NA | NA | 766 | 1 | 765 [Error: < 10 cases or controls] |
| 524.3 Anomalies ;  | NA | NA | NA | 897 | 1 | 896 [Error: < 10 cases or controls] |
| 250.12 Type 1 diab | NA | NA | NA | 666 | 1 | 665 [Error: < 10 cases or controls] |

|                     |    |    |    |     |   |                                     |
|---------------------|----|----|----|-----|---|-------------------------------------|
| 573.2 Liver replac  | NA | NA | NA | 791 | 1 | 790 [Error: < 10 cases or controls] |
| 711.3 Behcet's sy   | NA | NA | NA | 833 | 1 | 832 [Error: < 10 cases or controls] |
| 320 Meningitis      | NA | NA | NA | 930 | 1 | 929 [Error: < 10 cases or controls] |
| 420.1 Myocarditis   | NA | NA | NA | 762 | 1 | 761 [Error: < 10 cases or controls] |
| 681.6 Cellulitis an | NA | NA | NA | 823 | 1 | 822 [Error: < 10 cases or controls] |
| 755 Congenital      | NA | NA | NA | 924 | 1 | 923 [Error: < 10 cases or controls] |
| 259.2 Carcinoid s   | NA | NA | NA | 820 | 1 | 819 [Error: < 10 cases or controls] |
| 519.1 Tracheosto    | NA | NA | NA | 892 | 1 | 891 [Error: < 10 cases or controls] |
| 394.2 Mitral valv   | NA | NA | NA | 671 | 1 | 670 [Error: < 10 cases or controls] |
| 433.32 Moyamoya     | NA | NA | NA | 761 | 1 | 760 [Error: < 10 cases or controls] |
| 255.2 Adrenal hyp   | NA | NA | NA | 820 | 1 | 819 [Error: < 10 cases or controls] |
| 695.2 Bullous der   | NA | NA | NA | 798 | 1 | 797 [Error: < 10 cases or controls] |
| 270.32 Paraproteir  | NA | NA | NA | 912 | 1 | 911 [Error: < 10 cases or controls] |
| 145.3 Cancer of n   | NA | NA | NA | 923 | 1 | 922 [Error: < 10 cases or controls] |
| 442.3 Aneurysm c    | NA | NA | NA | 746 | 1 | 745 [Error: < 10 cases or controls] |
| 705.3 Hidradeniti   | NA | NA | NA | 840 | 1 | 839 [Error: < 10 cases or controls] |
| 287.4 Qualitative   | NA | NA | NA | 702 | 1 | 701 [Error: < 10 cases or controls] |
| 985 Toxic effect    | NA | NA | NA | 933 | 1 | 932 [Error: < 10 cases or controls] |
| 222 Benign neo      | NA | NA | NA | 870 | 1 | 869 [Error: < 10 cases or controls] |
| 353.1 Nerve plex    | NA | NA | NA | 842 | 1 | 841 [Error: < 10 cases or controls] |
| 656.9 Neonatal b    | NA | NA | NA | 937 | 1 | 936 [Error: < 10 cases or controls] |
| 803.1 Fracture of   | NA | NA | NA | 867 | 1 | 866 [Error: < 10 cases or controls] |
| 794 Abnormal r      | NA | NA | NA | 935 | 1 | 934 [Error: < 10 cases or controls] |
| 252.2 Hypoparat     | NA | NA | NA | 820 | 1 | 819 [Error: < 10 cases or controls] |
| 709.2 Sicca syndr   | NA | NA | NA | 794 | 1 | 793 [Error: < 10 cases or controls] |
| 198.6 Secondary i   | NA | NA | NA | 839 | 1 | 838 [Error: < 10 cases or controls] |
| 524 Dentofacial     | NA | NA | NA | 897 | 1 | 896 [Error: < 10 cases or controls] |
| 870.2 Open woun     | NA | NA | NA | 862 | 1 | 861 [Error: < 10 cases or controls] |
| 315.3 Mental ret    | NA | NA | NA | 924 | 1 | 923 [Error: < 10 cases or controls] |
| 585.32 End stage r  | NA | NA | NA | 805 | 1 | 804 [Error: < 10 cases or controls] |
| 70.4 Chronic he     | NA | NA | NA | 810 | 1 | 809 [Error: < 10 cases or controls] |
| 962.1 Adrenal cor   | NA | NA | NA | 840 | 1 | 839 [Error: < 10 cases or controls] |
| 368.5 Color visior  | NA | NA | NA | 860 | 1 | 859 [Error: < 10 cases or controls] |

|                      |    |    |    |     |   |                                     |
|----------------------|----|----|----|-----|---|-------------------------------------|
| 256 Ovarian dys      | NA | NA | NA | 820 | 1 | 819 [Error: < 10 cases or controls] |
| 964 Poisoning b      | NA | NA | NA | 840 | 1 | 839 [Error: < 10 cases or controls] |
| 388 Other disor      | NA | NA | NA | 786 | 1 | 785 [Error: < 10 cases or controls] |
| 748 Anomalies i      | NA | NA | NA | 936 | 1 | 935 [Error: < 10 cases or controls] |
| 728.1 Muscular c     | NA | NA | NA | 712 | 1 | 711 [Error: < 10 cases or controls] |
| 876 Posttrauma       | NA | NA | NA | 862 | 1 | 861 [Error: < 10 cases or controls] |
| 751.3 Obstructive    | NA | NA | NA | 913 | 1 | 912 [Error: < 10 cases or controls] |
| 580.32 Nephritis a   | NA | NA | NA | 805 | 1 | 804 [Error: < 10 cases or controls] |
| 851 Complicatic      | NA | NA | NA | 864 | 1 | 863 [Error: < 10 cases or controls] |
| 715.3 Spinal enth    | NA | NA | NA | 819 | 1 | 818 [Error: < 10 cases or controls] |
| 755.1 Congenital     | NA | NA | NA | 924 | 1 | 923 [Error: < 10 cases or controls] |
| 277.4 Disorders o    | NA | NA | NA | 898 | 1 | 897 [Error: < 10 cases or controls] |
| 559 Ileostomy s      | NA | NA | NA | 708 | 1 | 707 [Error: < 10 cases or controls] |
| 596.1 Bladder nec    | NA | NA | NA | 895 | 1 | 894 [Error: < 10 cases or controls] |
| 255.21 Glucocortic   | NA | NA | NA | 820 | 1 | 819 [Error: < 10 cases or controls] |
| 277 Other disor      | NA | NA | NA | 898 | 1 | 897 [Error: < 10 cases or controls] |
| 710.19 Unspecific    | NA | NA | NA | 833 | 1 | 832 [Error: < 10 cases or controls] |
| 535.1 Acute gastr    | NA | NA | NA | 875 | 1 | 874 [Error: < 10 cases or controls] |
| 149.9 Cancer of o    | NA | NA | NA | 923 | 1 | 922 [Error: < 10 cases or controls] |
| 599.8 Other symç     | NA | NA | NA | 753 | 1 | 752 [Error: < 10 cases or controls] |
| 724.8 Other symç     | NA | NA | NA | 739 | 1 | 738 [Error: < 10 cases or controls] |
| 757 Congenital       | NA | NA | NA | 921 | 1 | 920 [Error: < 10 cases or controls] |
| 967 Adverse eff      | NA | NA | NA | 840 | 1 | 839 [Error: < 10 cases or controls] |
| 41.12 Methicillin    | NA | NA | NA | 914 | 1 | 913 [Error: < 10 cases or controls] |
| 159.2 Malignant r    | NA | NA | NA | 891 | 1 | 890 [Error: < 10 cases or controls] |
| 818.2 Subarachnc     | NA | NA | NA | 918 | 1 | 917 [Error: < 10 cases or controls] |
| 783.1 Postproced     | NA | NA | NA | 868 | 1 | 867 [Error: < 10 cases or controls] |
| 453 Chronic ver      | NA | NA | NA | 708 | 1 | 707 [Error: < 10 cases or controls] |
| 556.11 Angiodyspl    | NA | NA | NA | 708 | 1 | 707 [Error: < 10 cases or controls] |
| 530.6 Diverticulur   | NA | NA | NA | 674 | 1 | 673 [Error: < 10 cases or controls] |
| 724.9 Other unsp     | NA | NA | NA | 739 | 1 | 738 [Error: < 10 cases or controls] |
| 803.21 Colles' fract | NA | NA | NA | 867 | 1 | 866 [Error: < 10 cases or controls] |
| 225.2 Benign neo     | NA | NA | NA | 914 | 1 | 913 [Error: < 10 cases or controls] |

|                        |    |    |    |     |   |                                     |
|------------------------|----|----|----|-----|---|-------------------------------------|
| 994.1 Systemic in NA   | NA | NA | NA | 932 | 1 | 931 [Error: < 10 cases or controls] |
| 41.9 Infection w NA    | NA | NA | NA | 914 | 1 | 913 [Error: < 10 cases or controls] |
| 618 Genital pro NA     | NA | NA | NA | 937 | 1 | 936 [Error: < 10 cases or controls] |
| 371.33 Noninfectic NA  | NA | NA | NA | 783 | 1 | 782 [Error: < 10 cases or controls] |
| 200.1 Polycythem NA    | NA | NA | NA | 871 | 1 | 870 [Error: < 10 cases or controls] |
| 736.6 Unequal leg NA   | NA | NA | NA | 855 | 1 | 854 [Error: < 10 cases or controls] |
| 348.7 Coma NA          | NA | NA | NA | 824 | 1 | 823 [Error: < 10 cases or controls] |
| 528.3 Cellulitis an NA | NA | NA | NA | 898 | 1 | 897 [Error: < 10 cases or controls] |
| 743.21 Pathologic f NA | NA | NA | NA | 864 | 1 | 863 [Error: < 10 cases or controls] |
| 964.1 Anticoagula NA   | NA | NA | NA | 840 | 1 | 839 [Error: < 10 cases or controls] |
| 285.22 Anemia in r NA  | NA | NA | NA | 890 | 1 | 889 [Error: < 10 cases or controls] |
| 965.1 Opiates anc NA   | NA | NA | NA | 840 | 1 | 839 [Error: < 10 cases or controls] |
| 592.13 Chronic int NA  | NA | NA | NA | 817 | 1 | 816 [Error: < 10 cases or controls] |
| 41.8 H. pylori NA      | NA | NA | NA | 914 | 1 | 913 [Error: < 10 cases or controls] |
| 290.13 Senile dem NA   | NA | NA | NA | 847 | 1 | 846 [Error: < 10 cases or controls] |
| 528.41 Cyst of the NA  | NA | NA | NA | 898 | 1 | 897 [Error: < 10 cases or controls] |
| 157 Pancreatic f NA    | NA | NA | NA | 891 | 1 | 890 [Error: < 10 cases or controls] |
| 523.32 Chronic per NA  | NA | NA | NA | 897 | 1 | 896 [Error: < 10 cases or controls] |
| 364.9 Cornea repl NA   | NA | NA | NA | 833 | 1 | 832 [Error: < 10 cases or controls] |
| 575.8 Other disor NA   | NA | NA | NA | 892 | 1 | 891 [Error: < 10 cases or controls] |
| 117 Mycoses NA         | NA | NA | NA | 832 | 1 | 831 [Error: < 10 cases or controls] |
| 610 Benign mar NA      | NA | NA | NA | 921 | 1 | 920 [Error: < 10 cases or controls] |
| 290.16 Vascular de NA  | NA | NA | NA | 847 | 1 | 846 [Error: < 10 cases or controls] |
| 242.31 Thyrotoxic f NA | NA | NA | NA | 831 | 1 | 830 [Error: < 10 cases or controls] |
| 871.4 Open woun NA     | NA | NA | NA | 862 | 1 | 861 [Error: < 10 cases or controls] |
| 857 Mechanical NA      | NA | NA | NA | 864 | 1 | 863 [Error: < 10 cases or controls] |
| 602.3 Dysplasia o NA   | NA | NA | NA | 667 | 1 | 666 [Error: < 10 cases or controls] |
| 170.2 Cancer of c NA   | NA | NA | NA | 932 | 1 | 931 [Error: < 10 cases or controls] |
| 346 Abnormal f NA      | NA | NA | NA | 824 | 1 | 823 [Error: < 10 cases or controls] |
| 289.1 Myelofibro: NA   | NA | NA | NA | 844 | 1 | 843 [Error: < 10 cases or controls] |
| 574.11 Cholelithias NA | NA | NA | NA | 892 | 1 | 891 [Error: < 10 cases or controls] |
| 204 Leukemia NA        | NA | NA | NA | 928 | 1 | 927 [Error: < 10 cases or controls] |
| 253.2 Pituitary hy NA  | NA | NA | NA | 820 | 1 | 819 [Error: < 10 cases or controls] |

|                     |    |    |    |     |   |                                     |
|---------------------|----|----|----|-----|---|-------------------------------------|
| 613.8 Other speci   | NA | NA | NA | 932 | 1 | 931 [Error: < 10 cases or controls] |
| 587 Kidney repl     | NA | NA | NA | 805 | 1 | 804 [Error: < 10 cases or controls] |
| 361.2 Retinoschis   | NA | NA | NA | 833 | 1 | 832 [Error: < 10 cases or controls] |
| 474.1 Acute tonsi   | NA | NA | NA | 693 | 1 | 692 [Error: < 10 cases or controls] |
| 782.6 Pallor and f  | NA | NA | NA | 830 | 1 | 829 [Error: < 10 cases or controls] |
| 962 Poisoning b     | NA | NA | NA | 840 | 1 | 839 [Error: < 10 cases or controls] |
| 695.1 Toxic eryth   | NA | NA | NA | 798 | 1 | 797 [Error: < 10 cases or controls] |
| 260.22 Nutritional  | NA | NA | NA | 848 | 1 | 847 [Error: < 10 cases or controls] |
| 260.3 Adult failur  | NA | NA | NA | 848 | 1 | 847 [Error: < 10 cases or controls] |
| 251 Other disor     | NA | NA | NA | 820 | 1 | 819 [Error: < 10 cases or controls] |
| 282.5 Sickle cell a | NA | NA | NA | 890 | 1 | 889 [Error: < 10 cases or controls] |
| 316.1 Polyneurop    | NA | NA | NA | 774 | 1 | 773 [Error: < 10 cases or controls] |
| 303.4 Somatoforr    | NA | NA | NA | 712 | 1 | 711 [Error: < 10 cases or controls] |
| 590 Pyelonephr      | NA | NA | NA | 817 | 1 | 816 [Error: < 10 cases or controls] |
| 360.3 Hypotony c    | NA | NA | NA | 833 | 1 | 832 [Error: < 10 cases or controls] |
| 564.9 Personal hi:  | NA | NA | NA | 708 | 1 | 707 [Error: < 10 cases or controls] |
| 8.5 Bacterial er    | NA | NA | NA | 930 | 1 | 929 [Error: < 10 cases or controls] |
| 442.4 Arterial dis: | NA | NA | NA | 746 | 1 | 745 [Error: < 10 cases or controls] |
| 531.1 Hemorrhag     | NA | NA | NA | 913 | 1 | 912 [Error: < 10 cases or controls] |
| 509.3 Pulmonary     | NA | NA | NA | 766 | 1 | 765 [Error: < 10 cases or controls] |
| 742.8 Articular ca  | NA | NA | NA | 824 | 1 | 823 [Error: < 10 cases or controls] |
| 598 Abnormal f      | NA | NA | NA | 934 | 1 | 933 [Error: < 10 cases or controls] |
| 781.1 Loss of heig  | NA | NA | NA | 914 | 1 | 913 [Error: < 10 cases or controls] |
| 442.2 Aneurysm c    | NA | NA | NA | 746 | 1 | 745 [Error: < 10 cases or controls] |
| 756.1 Congenital    | NA | NA | NA | 924 | 1 | 923 [Error: < 10 cases or controls] |
| 842 Other sprai     | NA | NA | NA | 812 | 1 | 811 [Error: < 10 cases or controls] |
| 223 Benign neo      | NA | NA | NA | 740 | 1 | 739 [Error: < 10 cases or controls] |
| 853 Complicatic     | NA | NA | NA | 864 | 1 | 863 [Error: < 10 cases or controls] |
| 550.3 Femoral he    | NA | NA | NA | 828 | 1 | 827 [Error: < 10 cases or controls] |
| 377.1 Optic atrop   | NA | NA | NA | 803 | 1 | 802 [Error: < 10 cases or controls] |
| 250.15 Diabetes ty  | NA | NA | NA | 666 | 1 | 665 [Error: < 10 cases or controls] |
| 588.2 Secondary l   | NA | NA | NA | 805 | 1 | 804 [Error: < 10 cases or controls] |
| 348.2 Cerebral ed   | NA | NA | NA | 824 | 1 | 823 [Error: < 10 cases or controls] |

|                     |    |    |    |     |   |     |                                 |
|---------------------|----|----|----|-----|---|-----|---------------------------------|
| 727.7 Contracture   | NA | NA | NA | 712 | 1 | 711 | [Error: < 10 cases or controls] |
| 315 Develomen       | NA | NA | NA | 924 | 1 | 923 | [Error: < 10 cases or controls] |
| 279.11 Deficiency   | NA | NA | NA | 891 | 1 | 890 | [Error: < 10 cases or controls] |
| 270.35 Macroglob    | NA | NA | NA | 912 | 1 | 911 | [Error: < 10 cases or controls] |
| 282 Hereditary      | NA | NA | NA | 890 | 1 | 889 | [Error: < 10 cases or controls] |
| 249 Secondary       | NA | NA | NA | 666 | 1 | 665 | [Error: < 10 cases or controls] |
| 394.4 Acute rheu    | NA | NA | NA | 671 | 1 | 670 | [Error: < 10 cases or controls] |
| 38.1 Gram negat     | NA | NA | NA | 914 | 1 | 913 | [Error: < 10 cases or controls] |
| 592.11 Acute cystit | NA | NA | NA | 817 | 1 | 816 | [Error: < 10 cases or controls] |
| 875 Non-healin      | NA | NA | NA | 862 | 1 | 861 | [Error: < 10 cases or controls] |
| 371.9 Chronic infl  | NA | NA | NA | 783 | 1 | 782 | [Error: < 10 cases or controls] |
| 528.6 Leukoplaki    | NA | NA | NA | 898 | 1 | 897 | [Error: < 10 cases or controls] |
| 972.6 Antihypert    | NA | NA | NA | 840 | 1 | 839 | [Error: < 10 cases or controls] |
| 8.52 Intestinal ir  | NA | NA | NA | 930 | 1 | 929 | [Error: < 10 cases or controls] |
| 378.2 Nystagmus     | NA | NA | NA | 803 | 1 | 802 | [Error: < 10 cases or controls] |
| 736.4 Genu valg     | NA | NA | NA | 855 | 1 | 854 | [Error: < 10 cases or controls] |
| 379.4 Anomalies     | NA | NA | NA | 803 | 1 | 802 | [Error: < 10 cases or controls] |
| 368.1 Amblyopia     | NA | NA | NA | 860 | 1 | 859 | [Error: < 10 cases or controls] |
| 709.7 Unspecifec    | NA | NA | NA | 794 | 1 | 793 | [Error: < 10 cases or controls] |
| 288.11 Neutropeni   | NA | NA | NA | 844 | 1 | 843 | [Error: < 10 cases or controls] |
| 994.21 Septic choc  | NA | NA | NA | 932 | 1 | 931 | [Error: < 10 cases or controls] |
| 578.1 Hemateme      | NA | NA | NA | 797 | 1 | 796 | [Error: < 10 cases or controls] |
| 733.2 Cyst of bon   | NA | NA | NA | 831 | 1 | 830 | [Error: < 10 cases or controls] |
| 707.1 Decubitus     | NA | NA | NA | 924 | 1 | 923 | [Error: < 10 cases or controls] |
| 297.2 Suicide or s  | NA | NA | NA | 712 | 1 | 711 | [Error: < 10 cases or controls] |
| 194 Cancer of o     | NA | NA | NA | 915 | 1 | 914 | [Error: < 10 cases or controls] |
| 364.4 Corneal de    | NA | NA | NA | 833 | 1 | 832 | [Error: < 10 cases or controls] |
| 363.3 Chorioretin   | NA | NA | NA | 833 | 1 | 832 | [Error: < 10 cases or controls] |
| 443.1 Raynaud's     | NA | NA | NA | 746 | 1 | 745 | [Error: < 10 cases or controls] |
| 750.2 Lower gastr   | NA | NA | NA | 913 | 1 | 912 | [Error: < 10 cases or controls] |
| 790.9 Abnormal a    | NA | NA | NA | 841 | 1 | 840 | [Error: < 10 cases or controls] |
| 526.9 Jaw disease   | NA | NA | NA | 897 | 1 | 896 | [Error: < 10 cases or controls] |
| 860 Bone marrc      | NA | NA | NA | 932 | 1 | 931 | [Error: < 10 cases or controls] |



|                      |    |    |    |     |   |                                     |
|----------------------|----|----|----|-----|---|-------------------------------------|
| 263 Other nutri      | NA | NA | NA | 848 | 1 | 847 [Error: < 10 cases or controls] |
| 758.1 Chromoson      | NA | NA | NA | 921 | 1 | 920 [Error: < 10 cases or controls] |
| 686.4 Pyogenic gr    | NA | NA | NA | 823 | 1 | 822 [Error: < 10 cases or controls] |
| 276.11 Hyperosmo     | NA | NA | NA | 808 | 2 | 806 [Error: < 10 cases or controls] |
| 347 Cataplexy a      | NA | NA | NA | 825 | 2 | 823 [Error: < 10 cases or controls] |
| 303 Psychogeni       | NA | NA | NA | 713 | 2 | 711 [Error: < 10 cases or controls] |
| 759 Other and t      | NA | NA | NA | 922 | 2 | 920 [Error: < 10 cases or controls] |
| 709.3 Systemic sc    | NA | NA | NA | 795 | 2 | 793 [Error: < 10 cases or controls] |
| 800.2 Fracture of    | NA | NA | NA | 868 | 2 | 866 [Error: < 10 cases or controls] |
| 480.1 Bacterial pr   | NA | NA | NA | 791 | 2 | 789 [Error: < 10 cases or controls] |
| 527.7 Disturbanc     | NA | NA | NA | 899 | 2 | 897 [Error: < 10 cases or controls] |
| 557.1 Celiac disea   | NA | NA | NA | 709 | 2 | 707 [Error: < 10 cases or controls] |
| 444.1 Arterial em    | NA | NA | NA | 747 | 2 | 745 [Error: < 10 cases or controls] |
| 317.11 Alcoholic liv | NA | NA | NA | 775 | 2 | 773 [Error: < 10 cases or controls] |
| 513.32 Orthopnea     | NA | NA | NA | 907 | 2 | 905 [Error: < 10 cases or controls] |
| 513.3 Hypoventil     | NA | NA | NA | 907 | 2 | 905 [Error: < 10 cases or controls] |
| 70.2 Viral hepati    | NA | NA | NA | 811 | 2 | 809 [Error: < 10 cases or controls] |
| 986 Toxic effect     | NA | NA | NA | 934 | 2 | 932 [Error: < 10 cases or controls] |
| 707.3 Chronic ulc    | NA | NA | NA | 925 | 2 | 923 [Error: < 10 cases or controls] |
| 526.5 Inflammato     | NA | NA | NA | 898 | 2 | 896 [Error: < 10 cases or controls] |
| 597.2 Urinary con    | NA | NA | NA | 896 | 2 | 894 [Error: < 10 cases or controls] |
| 250.13 Type 1 diab   | NA | NA | NA | 667 | 2 | 665 [Error: < 10 cases or controls] |
| 430.3 Subdural h     | NA | NA | NA | 762 | 2 | 760 [Error: < 10 cases or controls] |
| 870.1 Open woun      | NA | NA | NA | 863 | 2 | 861 [Error: < 10 cases or controls] |
| 704.1 Alopecia       | NA | NA | NA | 879 | 2 | 877 [Error: < 10 cases or controls] |
| 592.12 Chronic cys   | NA | NA | NA | 818 | 2 | 816 [Error: < 10 cases or controls] |
| 498 Acute bron       | NA | NA | NA | 784 | 2 | 782 [Error: < 10 cases or controls] |
| 292.5 Transient a    | NA | NA | NA | 848 | 2 | 846 [Error: < 10 cases or controls] |
| 772.4 Rhabdomy       | NA | NA | NA | 874 | 2 | 872 [Error: < 10 cases or controls] |
| 370.2 Superficial l  | NA | NA | NA | 784 | 2 | 782 [Error: < 10 cases or controls] |
| 286.4 Acquired cc    | NA | NA | NA | 703 | 2 | 701 [Error: < 10 cases or controls] |
| 287.1 Spontaneo      | NA | NA | NA | 703 | 2 | 701 [Error: < 10 cases or controls] |
| 379.9 Pain, swelli   | NA | NA | NA | 804 | 2 | 802 [Error: < 10 cases or controls] |

|                       |    |    |    |     |   |                                     |
|-----------------------|----|----|----|-----|---|-------------------------------------|
| 594.2 Calculus of NA  | NA | NA | NA | 870 | 2 | 868 [Error: < 10 cases or controls] |
| 227.3 Benign neo NA   | NA | NA | NA | 916 | 2 | 914 [Error: < 10 cases or controls] |
| 341 Other demy NA     | NA | NA | NA | 825 | 2 | 823 [Error: < 10 cases or controls] |
| 930 Allergic rea NA   | NA | NA | NA | 792 | 2 | 790 [Error: < 10 cases or controls] |
| 712 Infective co NA   | NA | NA | NA | 834 | 2 | 832 [Error: < 10 cases or controls] |
| 732.7 Osteochonr NA   | NA | NA | NA | 832 | 2 | 830 [Error: < 10 cases or controls] |
| 510.2 Lung transp NA  | NA | NA | NA | 856 | 2 | 854 [Error: < 10 cases or controls] |
| 290.12 Dementia v NA  | NA | NA | NA | 848 | 2 | 846 [Error: < 10 cases or controls] |
| 301 Personality NA    | NA | NA | NA | 713 | 2 | 711 [Error: < 10 cases or controls] |
| 189.4 Malignant r NA  | NA | NA | NA | 913 | 2 | 911 [Error: < 10 cases or controls] |
| 277.51 Lipoprotein NA | NA | NA | NA | 899 | 2 | 897 [Error: < 10 cases or controls] |
| 355 Complex re NA     | NA | NA | NA | 843 | 2 | 841 [Error: < 10 cases or controls] |
| 226 Benign neo NA     | NA | NA | NA | 916 | 2 | 914 [Error: < 10 cases or controls] |
| 285.21 Anemia in c NA | NA | NA | NA | 891 | 2 | 889 [Error: < 10 cases or controls] |
| 609 Male infert NA    | NA | NA | NA | 637 | 2 | 635 [Error: < 10 cases or controls] |
| 609.2 Abnormal s NA   | NA | NA | NA | 637 | 2 | 635 [Error: < 10 cases or controls] |
| 535.9 Gastritis an NA | NA | NA | NA | 876 | 2 | 874 [Error: < 10 cases or controls] |
| 713.5 Arthropath NA   | NA | NA | NA | 834 | 2 | 832 [Error: < 10 cases or controls] |
| 769 Nonallopat NA     | NA | NA | NA | 937 | 2 | 935 [Error: < 10 cases or controls] |
| 557 Intestinal rr NA  | NA | NA | NA | 709 | 2 | 707 [Error: < 10 cases or controls] |
| 579.2 Splenomeg NA    | NA | NA | NA | 798 | 2 | 796 [Error: < 10 cases or controls] |
| 8.6 Viral Enteri NA   | NA | NA | NA | 931 | 2 | 929 [Error: < 10 cases or controls] |
| 90 Sexually tra NA    | NA | NA | NA | 937 | 2 | 935 [Error: < 10 cases or controls] |
| 255.12 Hyperaldos NA  | NA | NA | NA | 821 | 2 | 819 [Error: < 10 cases or controls] |
| 10 Tuberculosi NA     | NA | NA | NA | 915 | 2 | 913 [Error: < 10 cases or controls] |
| 756 Other cong NA     | NA | NA | NA | 925 | 2 | 923 [Error: < 10 cases or controls] |
| 696.3 Pityriasis NA   | NA | NA | NA | 799 | 2 | 797 [Error: < 10 cases or controls] |
| 149.5 Hx of malig NA  | NA | NA | NA | 924 | 2 | 922 [Error: < 10 cases or controls] |
| 560.3 Peritoneal c NA | NA | NA | NA | 709 | 2 | 707 [Error: < 10 cases or controls] |
| 375.2 Epiphora NA     | NA | NA | NA | 804 | 2 | 802 [Error: < 10 cases or controls] |
| 288.3 Eosinophili NA  | NA | NA | NA | 845 | 2 | 843 [Error: < 10 cases or controls] |
| 695.4 Lupus (loca NA  | NA | NA | NA | 795 | 2 | 793 [Error: < 10 cases or controls] |
| 695.42 Systemic lu NA | NA | NA | NA | 795 | 2 | 793 [Error: < 10 cases or controls] |

|        |               |    |    |    |     |   |     |                                 |
|--------|---------------|----|----|----|-----|---|-----|---------------------------------|
| 754    | Congenital    | NA | NA | NA | 925 | 2 | 923 | [Error: < 10 cases or controls] |
| 754.2  | Spondylolysis | NA | NA | NA | 925 | 2 | 923 | [Error: < 10 cases or controls] |
| 187    | Cancer of o   | NA | NA | NA | 871 | 2 | 869 | [Error: < 10 cases or controls] |
| 187.2  | Malignant r   | NA | NA | NA | 871 | 2 | 869 | [Error: < 10 cases or controls] |
| 450    | Noninfectic   | NA | NA | NA | 937 | 2 | 935 | [Error: < 10 cases or controls] |
| 611.3  | Lump or m     | NA | NA | NA | 922 | 2 | 920 | [Error: < 10 cases or controls] |
| 611    | Abnormal f    | NA | NA | NA | 922 | 2 | 920 | [Error: < 10 cases or controls] |
| 580.2  | Nephrotic s   | NA | NA | NA | 806 | 2 | 804 | [Error: < 10 cases or controls] |
| 727.2  | Bursitis disc | NA | NA | NA | 713 | 2 | 711 | [Error: < 10 cases or controls] |
| 691.3  | Congenital    | NA | NA | NA | 799 | 2 | 797 | [Error: < 10 cases or controls] |
| 430.1  | Subarachnc    | NA | NA | NA | 762 | 2 | 760 | [Error: < 10 cases or controls] |
| 260.6  | Anorexia      | NA | NA | NA | 849 | 2 | 847 | [Error: < 10 cases or controls] |
| 526.41 | Temporom:     | NA | NA | NA | 898 | 2 | 896 | [Error: < 10 cases or controls] |
| 577.3  | Cyst and ps   | NA | NA | NA | 928 | 2 | 926 | [Error: < 10 cases or controls] |
| 209    | Neuroendo     | NA | NA | NA | 937 | 2 | 935 | [Error: < 10 cases or controls] |
| 246.7  | Abnormal r    | NA | NA | NA | 832 | 2 | 830 | [Error: < 10 cases or controls] |
| 441    | Vascular ins  | NA | NA | NA | 747 | 2 | 745 | [Error: < 10 cases or controls] |
| 258    | Iatrogenic e  | NA | NA | NA | 821 | 2 | 819 | [Error: < 10 cases or controls] |
| 151    | Cancer of s   | NA | NA | NA | 892 | 2 | 890 | [Error: < 10 cases or controls] |
| 474.2  | Chronic ton   | NA | NA | NA | 694 | 2 | 692 | [Error: < 10 cases or controls] |
| 743.4  | Stress fract  | NA | NA | NA | 865 | 2 | 863 | [Error: < 10 cases or controls] |
| 323    | Encephaliti:  | NA | NA | NA | 931 | 2 | 929 | [Error: < 10 cases or controls] |
| 323.8  | Encephaliti:  | NA | NA | NA | 931 | 2 | 929 | [Error: < 10 cases or controls] |
| 389.3  | Degenerati    | NA | NA | NA | 787 | 2 | 785 | [Error: < 10 cases or controls] |
| 695.8  | Other speci   | NA | NA | NA | 799 | 2 | 797 | [Error: < 10 cases or controls] |
| 772.1  | Muscular w    | NA | NA | NA | 874 | 2 | 872 | [Error: < 10 cases or controls] |
| 368.4  | Visual field  | NA | NA | NA | 861 | 2 | 859 | [Error: < 10 cases or controls] |
| 384    | Other disor   | NA | NA | NA | 843 | 2 | 841 | [Error: < 10 cases or controls] |
| 384.4  | Perforation   | NA | NA | NA | 843 | 2 | 841 | [Error: < 10 cases or controls] |
| 589    | Abnormal r    | NA | NA | NA | 806 | 2 | 804 | [Error: < 10 cases or controls] |
| 198.3  | Secondary i   | NA | NA | NA | 840 | 2 | 838 | [Error: < 10 cases or controls] |
| 855    | Complicatic   | NA | NA | NA | 865 | 2 | 863 | [Error: < 10 cases or controls] |
| 574.2  | Calculus of   | NA | NA | NA | 893 | 2 | 891 | [Error: < 10 cases or controls] |

|                    |    |    |    |     |   |                                     |
|--------------------|----|----|----|-----|---|-------------------------------------|
| 701.6 Acquired ac  | NA | NA | NA | 846 | 2 | 844 [Error: < 10 cases or controls] |
| 580.31 Nephritis a | NA | NA | NA | 806 | 2 | 804 [Error: < 10 cases or controls] |
| 275.53 Disorders o | NA | NA | NA | 895 | 2 | 893 [Error: < 10 cases or controls] |
| 711 Arthropath     | NA | NA | NA | 834 | 2 | 832 [Error: < 10 cases or controls] |
| 972.1 Cardiac rhy  | NA | NA | NA | 841 | 2 | 839 [Error: < 10 cases or controls] |
| 969 Poisoning b    | NA | NA | NA | 841 | 2 | 839 [Error: < 10 cases or controls] |
| 312 Conduct dis    | NA | NA | NA | 925 | 2 | 923 [Error: < 10 cases or controls] |
| 528.1 Stomatitis a | NA | NA | NA | 899 | 2 | 897 [Error: < 10 cases or controls] |
| 333.2 Myoclonus    | NA | NA | NA | 825 | 2 | 823 [Error: < 10 cases or controls] |
| 80 Postoperati     | NA | NA | NA | 926 | 2 | 924 [Error: < 10 cases or controls] |
| 191.11 Cancer of b | NA | NA | NA | 915 | 2 | 913 [Error: < 10 cases or controls] |
| 270.33 Amyloidosi  | NA | NA | NA | 913 | 2 | 911 [Error: < 10 cases or controls] |
| 585.34 Chronic Kid | NA | NA | NA | 806 | 2 | 804 [Error: < 10 cases or controls] |
| 452.1 Iatrogenic p | NA | NA | NA | 709 | 2 | 707 [Error: < 10 cases or controls] |
| 496.3 Bronchiecta  | NA | NA | NA | 784 | 2 | 782 [Error: < 10 cases or controls] |
| 306 Other ment     | NA | NA | NA | 713 | 2 | 711 [Error: < 10 cases or controls] |
| 340.1 Migrain wit  | NA | NA | NA | 900 | 2 | 898 [Error: < 10 cases or controls] |
| 525.1 Loss of teet | NA | NA | NA | 898 | 2 | 896 [Error: < 10 cases or controls] |
| 443.7 Peripheral a | NA | NA | NA | 747 | 2 | 745 [Error: < 10 cases or controls] |
| 790.1 Elevated se  | NA | NA | NA | 842 | 2 | 840 [Error: < 10 cases or controls] |
| 686.2 Impetigo     | NA | NA | NA | 824 | 2 | 822 [Error: < 10 cases or controls] |
| 275.11 Hereditary  | NA | NA | NA | 895 | 2 | 893 [Error: < 10 cases or controls] |
| 170.1 Bone cance   | NA | NA | NA | 933 | 2 | 931 [Error: < 10 cases or controls] |
| 974 Poisoning b    | NA | NA | NA | 841 | 2 | 839 [Error: < 10 cases or controls] |
| 529 Diseases an    | NA | NA | NA | 899 | 2 | 897 [Error: < 10 cases or controls] |
| 709.4 Polymyositi  | NA | NA | NA | 795 | 2 | 793 [Error: < 10 cases or controls] |
| 601.4 Balanopost   | NA | NA | NA | 668 | 2 | 666 [Error: < 10 cases or controls] |
| 349 Other and t    | NA | NA | NA | 825 | 2 | 823 [Error: < 10 cases or controls] |
| 727.5 Rupture of   | NA | NA | NA | 713 | 2 | 711 [Error: < 10 cases or controls] |
| 250.5 Glycosuria t | NA | NA | NA | 667 | 2 | 665 [Error: < 10 cases or controls] |
| 722.7 Interverteb  | NA | NA | NA | 740 | 2 | 738 [Error: < 10 cases or controls] |
| 365.2 Primary anç  | NA | NA | NA | 834 | 2 | 832 [Error: < 10 cases or controls] |
| 716.1 Unspecifiec  | NA | NA | NA | 834 | 2 | 832 [Error: < 10 cases or controls] |

|                    |    |    |    |     |   |                                     |
|--------------------|----|----|----|-----|---|-------------------------------------|
| 958.2 Traumatic a  | NA | NA | NA | 934 | 2 | 932 [Error: < 10 cases or controls] |
| 800.1 Fracture of  | NA | NA | NA | 868 | 2 | 866 [Error: < 10 cases or controls] |
| 286.81 Primary hyp | NA | NA | NA | 703 | 2 | 701 [Error: < 10 cases or controls] |
| 255.11 Cushing's s | NA | NA | NA | 821 | 2 | 819 [Error: < 10 cases or controls] |
| 276.42 Alkalosis   | NA | NA | NA | 808 | 2 | 806 [Error: < 10 cases or controls] |
| 286.8 Hypercoagu   | NA | NA | NA | 703 | 2 | 701 [Error: < 10 cases or controls] |
| 505 Other pulm     | NA | NA | NA | 768 | 3 | 765 [Error: < 10 cases or controls] |
| 348.4 Cerebral cy  | NA | NA | NA | 826 | 3 | 823 [Error: < 10 cases or controls] |
| 260.2 severe prot  | NA | NA | NA | 850 | 3 | 847 [Error: < 10 cases or controls] |
| 41.11 Methicillin  | NA | NA | NA | 916 | 3 | 913 [Error: < 10 cases or controls] |
| 536.3 Gastropare   | NA | NA | NA | 877 | 3 | 874 [Error: < 10 cases or controls] |
| 420.3 Endocarditi  | NA | NA | NA | 764 | 3 | 761 [Error: < 10 cases or controls] |
| 514.1 Abnormal r   | NA | NA | NA | 892 | 3 | 889 [Error: < 10 cases or controls] |
| 597.8 Urethral hy  | NA | NA | NA | 897 | 3 | 894 [Error: < 10 cases or controls] |
| 38.3 Bacteremia    | NA | NA | NA | 916 | 3 | 913 [Error: < 10 cases or controls] |
| 155 Cancer of li   | NA | NA | NA | 893 | 3 | 890 [Error: < 10 cases or controls] |
| 155.1 Malignant r  | NA | NA | NA | 893 | 3 | 890 [Error: < 10 cases or controls] |
| 701.5 Abnormal g   | NA | NA | NA | 847 | 3 | 844 [Error: < 10 cases or controls] |
| 327.1 Hypersomn    | NA | NA | NA | 679 | 3 | 676 [Error: < 10 cases or controls] |
| 709.5 Dermatomy    | NA | NA | NA | 796 | 3 | 793 [Error: < 10 cases or controls] |
| 440.21 Atheroscler | NA | NA | NA | 748 | 3 | 745 [Error: < 10 cases or controls] |
| 530.2 Esophageal   | NA | NA | NA | 676 | 3 | 673 [Error: < 10 cases or controls] |
| 686 Other local    | NA | NA | NA | 825 | 3 | 822 [Error: < 10 cases or controls] |
| 705.1 Dyshidrosis  | NA | NA | NA | 842 | 3 | 839 [Error: < 10 cases or controls] |
| 613.5 Mastodyn     | NA | NA | NA | 934 | 3 | 931 [Error: < 10 cases or controls] |
| 457.2 Encounter f  | NA | NA | NA | 710 | 3 | 707 [Error: < 10 cases or controls] |
| 8 Intestinal ir    | NA | NA | NA | 932 | 3 | 929 [Error: < 10 cases or controls] |
| 772 Symptoms       | NA | NA | NA | 875 | 3 | 872 [Error: < 10 cases or controls] |
| 742.1 Loose body   | NA | NA | NA | 826 | 3 | 823 [Error: < 10 cases or controls] |
| 580.4 Renal scler  | NA | NA | NA | 807 | 3 | 804 [Error: < 10 cases or controls] |
| 800.3 Fracture of  | NA | NA | NA | 869 | 3 | 866 [Error: < 10 cases or controls] |
| 377 Disorders o    | NA | NA | NA | 805 | 3 | 802 [Error: < 10 cases or controls] |
| 459.1 Hemorrhag    | NA | NA | NA | 861 | 3 | 858 [Error: < 10 cases or controls] |

|                     |    |    |    |     |   |                                     |
|---------------------|----|----|----|-----|---|-------------------------------------|
| 750 Digestive c     | NA | NA | NA | 915 | 3 | 912 [Error: < 10 cases or controls] |
| 733.9 Chondrom      | NA | NA | NA | 833 | 3 | 830 [Error: < 10 cases or controls] |
| 577.1 Acute panc    | NA | NA | NA | 929 | 3 | 926 [Error: < 10 cases or controls] |
| 474 Acute and c     | NA | NA | NA | 695 | 3 | 692 [Error: < 10 cases or controls] |
| 153.3 Malignant r   | NA | NA | NA | 720 | 3 | 717 [Error: < 10 cases or controls] |
| 836 Traumatic       | NA | NA | NA | 869 | 3 | 866 [Error: < 10 cases or controls] |
| 333.4 Torsion dys   | NA | NA | NA | 826 | 3 | 823 [Error: < 10 cases or controls] |
| 255.1 Adrenal hyp   | NA | NA | NA | 822 | 3 | 819 [Error: < 10 cases or controls] |
| 522.5 Periapical a  | NA | NA | NA | 899 | 3 | 896 [Error: < 10 cases or controls] |
| 522 Diseases of     | NA | NA | NA | 899 | 3 | 896 [Error: < 10 cases or controls] |
| 695.7 Prurigo and   | NA | NA | NA | 800 | 3 | 797 [Error: < 10 cases or controls] |
| 195.1 Malignant r   | NA | NA | NA | 841 | 3 | 838 [Error: < 10 cases or controls] |
| 530.12 Ulcer of esc | NA | NA | NA | 676 | 3 | 673 [Error: < 10 cases or controls] |
| 599.6 Oliguria an   | NA | NA | NA | 755 | 3 | 752 [Error: < 10 cases or controls] |
| 588.1 Renal osteo   | NA | NA | NA | 807 | 3 | 804 [Error: < 10 cases or controls] |
| 588 Disorders r     | NA | NA | NA | 807 | 3 | 804 [Error: < 10 cases or controls] |
| 253.1 Pituitary hy  | NA | NA | NA | 822 | 3 | 819 [Error: < 10 cases or controls] |
| 458.2 Iatrogenic f  | NA | NA | NA | 861 | 3 | 858 [Error: < 10 cases or controls] |
| 715.2 Ankylosing    | NA | NA | NA | 821 | 3 | 818 [Error: < 10 cases or controls] |
| 145.2 Cancer of t   | NA | NA | NA | 925 | 3 | 922 [Error: < 10 cases or controls] |
| 420.21 Acute peric  | NA | NA | NA | 764 | 3 | 761 [Error: < 10 cases or controls] |
| 555.21 Ulcerative   | NA | NA | NA | 710 | 3 | 707 [Error: < 10 cases or controls] |
| 523.31 Acute peric  | NA | NA | NA | 899 | 3 | 896 [Error: < 10 cases or controls] |
| 285.2 Anemia of     | NA | NA | NA | 892 | 3 | 889 [Error: < 10 cases or controls] |
| 735.23 Hallux rigid | NA | NA | NA | 857 | 3 | 854 [Error: < 10 cases or controls] |
| 556 Ulceration      | NA | NA | NA | 710 | 3 | 707 [Error: < 10 cases or controls] |
| 556.1 Ulceration    | NA | NA | NA | 710 | 3 | 707 [Error: < 10 cases or controls] |
| 196 Radiothera      | NA | NA | NA | 841 | 3 | 838 [Error: < 10 cases or controls] |
| 364.1 Corneal op    | NA | NA | NA | 835 | 3 | 832 [Error: < 10 cases or controls] |
| 732 Osteochon       | NA | NA | NA | 833 | 3 | 830 [Error: < 10 cases or controls] |
| 159 Malignant r     | NA | NA | NA | 893 | 3 | 890 [Error: < 10 cases or controls] |
| 378.5 Paralytic str | NA | NA | NA | 805 | 3 | 802 [Error: < 10 cases or controls] |
| 433.5 Cerebral an   | NA | NA | NA | 763 | 3 | 760 [Error: < 10 cases or controls] |

|                     |    |    |    |     |   |                                     |
|---------------------|----|----|----|-----|---|-------------------------------------|
| 721.2 Spondylosis   | NA | NA | NA | 741 | 3 | 738 [Error: < 10 cases or controls] |
| 530.15 Eosinophilic | NA | NA | NA | 676 | 3 | 673 [Error: < 10 cases or controls] |
| 368.3 Anisometric   | NA | NA | NA | 862 | 3 | 859 [Error: < 10 cases or controls] |
| 288.1 Decreased     | NA | NA | NA | 846 | 3 | 843 [Error: < 10 cases or controls] |
| 818.1 Subdural h    | NA | NA | NA | 920 | 3 | 917 [Error: < 10 cases or controls] |
| 818 Intracranial    | NA | NA | NA | 920 | 3 | 917 [Error: < 10 cases or controls] |
| 364.51 Fuchs' dyst  | NA | NA | NA | 835 | 3 | 832 [Error: < 10 cases or controls] |
| 197 Chemother       | NA | NA | NA | 841 | 3 | 838 [Error: < 10 cases or controls] |
| 572 Ascites (no     | NA | NA | NA | 793 | 3 | 790 [Error: < 10 cases or controls] |
| 287.31 Primary thr  | NA | NA | NA | 704 | 3 | 701 [Error: < 10 cases or controls] |
| 364.2 Corneal ed    | NA | NA | NA | 835 | 3 | 832 [Error: < 10 cases or controls] |
| 362.22 Macular de   | NA | NA | NA | 826 | 3 | 823 [Error: < 10 cases or controls] |
| 782 Symptoms        | NA | NA | NA | 832 | 3 | 829 [Error: < 10 cases or controls] |
| 691 Congenital      | NA | NA | NA | 800 | 3 | 797 [Error: < 10 cases or controls] |
| 191.1 Cancer of b   | NA | NA | NA | 916 | 3 | 913 [Error: < 10 cases or controls] |
| 285.1 Acute post    | NA | NA | NA | 892 | 3 | 889 [Error: < 10 cases or controls] |
| 295.1 Schizophre    | NA | NA | NA | 714 | 3 | 711 [Error: < 10 cases or controls] |
| 300.3 Obsessive-c   | NA | NA | NA | 714 | 3 | 711 [Error: < 10 cases or controls] |
| 724.1 Disorders o   | NA | NA | NA | 741 | 3 | 738 [Error: < 10 cases or controls] |
| 870.5 Open woun     | NA | NA | NA | 864 | 3 | 861 [Error: < 10 cases or controls] |
| 420.22 Chronic per  | NA | NA | NA | 764 | 3 | 761 [Error: < 10 cases or controls] |
| 379.1 Scleritis anc | NA | NA | NA | 805 | 3 | 802 [Error: < 10 cases or controls] |
| 795.81 Elevated ca  | NA | NA | NA | 935 | 3 | 932 [Error: < 10 cases or controls] |
| 795.8 Abnormal t    | NA | NA | NA | 935 | 3 | 932 [Error: < 10 cases or controls] |
| 580.12 Non-prolife  | NA | NA | NA | 807 | 3 | 804 [Error: < 10 cases or controls] |
| 580.1 Glomerulor    | NA | NA | NA | 807 | 3 | 804 [Error: < 10 cases or controls] |
| 913 Toxic effect    | NA | NA | NA | 907 | 3 | 904 [Error: < 10 cases or controls] |
| 739 Contractur      | NA | NA | NA | 857 | 3 | 854 [Error: < 10 cases or controls] |
| 281.11 Pernicious   | NA | NA | NA | 892 | 3 | 889 [Error: < 10 cases or controls] |
| 411.9 Other acut    | NA | NA | NA | 377 | 3 | 374 [Error: < 10 cases or controls] |
| 528.5 Diseases of   | NA | NA | NA | 900 | 3 | 897 [Error: < 10 cases or controls] |
| 331.1 Hydroceph     | NA | NA | NA | 826 | 3 | 823 [Error: < 10 cases or controls] |
| 733 Other disor     | NA | NA | NA | 833 | 3 | 830 [Error: < 10 cases or controls] |

|                    |    |    |    |     |   |                                     |
|--------------------|----|----|----|-----|---|-------------------------------------|
| 293 Symptoms i     | NA | NA | NA | 902 | 3 | 899 [Error: < 10 cases or controls] |
| 713 Arthropath     | NA | NA | NA | 835 | 3 | 832 [Error: < 10 cases or controls] |
| 531.3 Duodenal u   | NA | NA | NA | 915 | 3 | 912 [Error: < 10 cases or controls] |
| 345.11 Generalizec | NA | NA | NA | 826 | 3 | 823 [Error: < 10 cases or controls] |
| 958 Certain earl   | NA | NA | NA | 935 | 3 | 932 [Error: < 10 cases or controls] |
| 242.3 Exophthalrn  | NA | NA | NA | 833 | 3 | 830 [Error: < 10 cases or controls] |
| 727.8 Plica syndrc | NA | NA | NA | 714 | 3 | 711 [Error: < 10 cases or controls] |
| 213 Benign neo     | NA | NA | NA | 742 | 3 | 739 [Error: < 10 cases or controls] |
| 225.1 Benign neo   | NA | NA | NA | 916 | 3 | 913 [Error: < 10 cases or controls] |
| 573.5 Jaundice (n  | NA | NA | NA | 793 | 3 | 790 [Error: < 10 cases or controls] |
| 447.1 Stricture of | NA | NA | NA | 748 | 3 | 745 [Error: < 10 cases or controls] |
| 295.3 Psychosis    | NA | NA | NA | 714 | 3 | 711 [Error: < 10 cases or controls] |
| 737.3 Kyphoscolic  | NA | NA | NA | 857 | 3 | 854 [Error: < 10 cases or controls] |
| 737 Curvature c    | NA | NA | NA | 857 | 3 | 854 [Error: < 10 cases or controls] |
| 277.5 Other disor  | NA | NA | NA | 900 | 3 | 897 [Error: < 10 cases or controls] |
| 362.31 Separation  | NA | NA | NA | 826 | 3 | 823 [Error: < 10 cases or controls] |
| 53.1 Herpes zost   | NA | NA | NA | 812 | 3 | 809 [Error: < 10 cases or controls] |
| 272.9 Unspecifec   | NA | NA | NA | 259 | 3 | 256 [Error: < 10 cases or controls] |
| 527.2 Sialoadeniti | NA | NA | NA | 900 | 3 | 897 [Error: < 10 cases or controls] |
| 380 Disorders o    | NA | NA | NA | 849 | 3 | 846 [Error: < 10 cases or controls] |
| 291.4 Specific nor | NA | NA | NA | 849 | 3 | 846 [Error: < 10 cases or controls] |
| 170 Cancer of b    | NA | NA | NA | 934 | 3 | 931 [Error: < 10 cases or controls] |
| 580.3 Nephritis ar | NA | NA | NA | 807 | 3 | 804 [Error: < 10 cases or controls] |
| 573.4 Acute and s  | NA | NA | NA | 794 | 4 | 790 [Error: < 10 cases or controls] |
| 290.2 Delirium du  | NA | NA | NA | 850 | 4 | 846 [Error: < 10 cases or controls] |
| 797.1 Cardiogenic  | NA | NA | NA | 932 | 4 | 928 [Error: < 10 cases or controls] |
| 451 Phlebitis an   | NA | NA | NA | 711 | 4 | 707 [Error: < 10 cases or controls] |
| 451.2 Phlebitis an | NA | NA | NA | 711 | 4 | 707 [Error: < 10 cases or controls] |
| 736.2 Acquired d   | NA | NA | NA | 858 | 4 | 854 [Error: < 10 cases or controls] |
| 585.2 Renal failur | NA | NA | NA | 808 | 4 | 804 [Error: < 10 cases or controls] |
| 212 Benign neo     | NA | NA | NA | 933 | 4 | 929 [Error: < 10 cases or controls] |
| 697 Sarcoidosis    | NA | NA | NA | 801 | 4 | 797 [Error: < 10 cases or controls] |
| 286.9 Abnormal c   | NA | NA | NA | 705 | 4 | 701 [Error: < 10 cases or controls] |



|                     |    |    |    |     |   |                                     |
|---------------------|----|----|----|-----|---|-------------------------------------|
| 681.7 Cellulitis an | NA | NA | NA | 826 | 4 | 822 [Error: < 10 cases or controls] |
| 500.1 Extrinsic all | NA | NA | NA | 769 | 4 | 765 [Error: < 10 cases or controls] |
| 705 Disorders o     | NA | NA | NA | 843 | 4 | 839 [Error: < 10 cases or controls] |
| 465.4 Acute laryn   | NA | NA | NA | 706 | 4 | 702 [Error: < 10 cases or controls] |
| 200 Myeloprolif     | NA | NA | NA | 931 | 4 | 927 [Error: < 10 cases or controls] |
| 733.8 Malunion a    | NA | NA | NA | 834 | 4 | 830 [Error: < 10 cases or controls] |
| 613 Other nonn      | NA | NA | NA | 935 | 4 | 931 [Error: < 10 cases or controls] |
| 454.11 Varicose ve  | NA | NA | NA | 711 | 4 | 707 [Error: < 10 cases or controls] |
| 454.1 Varicose ve   | NA | NA | NA | 711 | 4 | 707 [Error: < 10 cases or controls] |
| 297 Suicidal ide    | NA | NA | NA | 715 | 4 | 711 [Error: < 10 cases or controls] |
| 297.1 Suicidal ide  | NA | NA | NA | 715 | 4 | 711 [Error: < 10 cases or controls] |
| 350.3 Lack of coo   | NA | NA | NA | 887 | 4 | 883 [Error: < 10 cases or controls] |
| 280 Iron deficie    | NA | NA | NA | 893 | 4 | 889 [Error: < 10 cases or controls] |
| 280.1 Iron deficie  | NA | NA | NA | 893 | 4 | 889 [Error: < 10 cases or controls] |
| 817 Concussion      | NA | NA | NA | 921 | 4 | 917 [Error: < 10 cases or controls] |
| 227.1 Benign neo    | NA | NA | NA | 918 | 4 | 914 [Error: < 10 cases or controls] |
| 362.7 Hereditary    | NA | NA | NA | 827 | 4 | 823 [Error: < 10 cases or controls] |
| 856 Vascular co     | NA | NA | NA | 867 | 4 | 863 [Error: < 10 cases or controls] |
| 550.5 Ventral her   | NA | NA | NA | 831 | 4 | 827 [Error: < 10 cases or controls] |
| 592.1 Cystitis      | NA | NA | NA | 820 | 4 | 816 [Error: < 10 cases or controls] |
| 594.8 Renal colic   | NA | NA | NA | 872 | 4 | 868 [Error: < 10 cases or controls] |
| 362.27 Drusen (deç  | NA | NA | NA | 827 | 4 | 823 [Error: < 10 cases or controls] |
| 364.5 Corneal dys   | NA | NA | NA | 836 | 4 | 832 [Error: < 10 cases or controls] |
| 362.8 Retinal her   | NA | NA | NA | 827 | 4 | 823 [Error: < 10 cases or controls] |
| 372 Disorders o     | NA | NA | NA | 786 | 4 | 782 [Error: < 10 cases or controls] |
| 240 Simple and      | NA | NA | NA | 834 | 4 | 830 [Error: < 10 cases or controls] |
| 681.2 Cellulitis an | NA | NA | NA | 826 | 4 | 822 [Error: < 10 cases or controls] |
| 352.1 Trigeminal    | NA | NA | NA | 845 | 4 | 841 [Error: < 10 cases or controls] |
| 523.3 Periodontit   | NA | NA | NA | 900 | 4 | 896 [Error: < 10 cases or controls] |
| 242.2 Toxic multi   | NA | NA | NA | 834 | 4 | 830 [Error: < 10 cases or controls] |
| 290.11 Alzheimer's  | NA | NA | NA | 850 | 4 | 846 [Error: < 10 cases or controls] |
| 729 Other disor     | NA | NA | NA | 715 | 4 | 711 [Error: < 10 cases or controls] |
| 735.1 Flat foot     | NA | NA | NA | 858 | 4 | 854 [Error: < 10 cases or controls] |

|                      |    |    |    |     |   |                                     |
|----------------------|----|----|----|-----|---|-------------------------------------|
| 735.3 Hallux valgus  | NA | NA | NA | 858 | 4 | 854 [Error: < 10 cases or controls] |
| 327.5 Parasomnia     | NA | NA | NA | 680 | 4 | 676 [Error: < 10 cases or controls] |
| 949 Allergies, other | NA | NA | NA | 794 | 4 | 790 [Error: < 10 cases or controls] |
| 381.9 Otorrhea       | NA | NA | NA | 845 | 4 | 841 [Error: < 10 cases or controls] |
| 274.21 Chondrocal    | NA | NA | NA | 859 | 4 | 855 [Error: < 10 cases or controls] |
| 289.5 Diseases of    | NA | NA | NA | 847 | 4 | 843 [Error: < 10 cases or controls] |
| 790.8 Elevated C-    | NA | NA | NA | 844 | 4 | 840 [Error: < 10 cases or controls] |
| 225 Benign neo       | NA | NA | NA | 917 | 4 | 913 [Error: < 10 cases or controls] |
| 360.2 Progressive    | NA | NA | NA | 836 | 4 | 832 [Error: < 10 cases or controls] |
| 840.1 Muscle/ten     | NA | NA | NA | 815 | 4 | 811 [Error: < 10 cases or controls] |
| 426.25 Other heart   | NA | NA | NA | 353 | 4 | 349 [Error: < 10 cases or controls] |
| 525 Other disease    | NA | NA | NA | 900 | 4 | 896 [Error: < 10 cases or controls] |
| 526.4 Temporom       | NA | NA | NA | 900 | 4 | 896 [Error: < 10 cases or controls] |
| 350.6 Disturbance    | NA | NA | NA | 887 | 4 | 883 [Error: < 10 cases or controls] |
| 352.2 Facial nerve   | NA | NA | NA | 845 | 4 | 841 [Error: < 10 cases or controls] |
| 715.1 Sacroiliitis   | NA | NA | NA | 822 | 4 | 818 [Error: < 10 cases or controls] |
| 728.71 Contracture   | NA | NA | NA | 715 | 4 | 711 [Error: < 10 cases or controls] |
| 717 Polymyalgia      | NA | NA | NA | 936 | 4 | 932 [Error: < 10 cases or controls] |
| 295.2 Paranoid di    | NA | NA | NA | 715 | 4 | 711 [Error: < 10 cases or controls] |
| 965 Poisoning b      | NA | NA | NA | 843 | 4 | 839 [Error: < 10 cases or controls] |
| 371.1 Uveitis, nor   | NA | NA | NA | 786 | 4 | 782 [Error: < 10 cases or controls] |
| 190 Cancer of e      | NA | NA | NA | 917 | 4 | 913 [Error: < 10 cases or controls] |
| 495.1 Chronic obs    | NA | NA | NA | 786 | 4 | 782 [Error: < 10 cases or controls] |
| 481 Influenza        | NA | NA | NA | 793 | 4 | 789 [Error: < 10 cases or controls] |
| 604.1 Redundant      | NA | NA | NA | 639 | 4 | 635 [Error: < 10 cases or controls] |
| 790 Nonspecific      | NA | NA | NA | 844 | 4 | 840 [Error: < 10 cases or controls] |
| 339 Other head       | NA | NA | NA | 902 | 4 | 898 [Error: < 10 cases or controls] |
| 348.8 Encephalop     | NA | NA | NA | 827 | 4 | 823 [Error: < 10 cases or controls] |
| 245.21 Chronic lym   | NA | NA | NA | 834 | 4 | 830 [Error: < 10 cases or controls] |
| 706.1 Acne           | NA | NA | NA | 843 | 4 | 839 [Error: < 10 cases or controls] |
| 931 Contact der      | NA | NA | NA | 794 | 4 | 790 [Error: < 10 cases or controls] |
| 334 Degenerati       | NA | NA | NA | 827 | 4 | 823 [Error: < 10 cases or controls] |
| 286.5 Hemorrhag      | NA | NA | NA | 705 | 4 | 701 [Error: < 10 cases or controls] |

|                       |    |    |    |     |   |                                     |
|-----------------------|----|----|----|-----|---|-------------------------------------|
| 747.13 Congenital NA  | NA | NA | NA | 881 | 4 | 877 [Error: < 10 cases or controls] |
| 994 Sepsis and ! NA   | NA | NA | NA | 935 | 4 | 931 [Error: < 10 cases or controls] |
| 994.2 Sepsis NA       | NA | NA | NA | 935 | 4 | 931 [Error: < 10 cases or controls] |
| 290.3 Other persi NA  | NA | NA | NA | 850 | 4 | 846 [Error: < 10 cases or controls] |
| 990 Effects radi NA   | NA | NA | NA | 929 | 4 | 925 [Error: < 10 cases or controls] |
| 710.11 Acute osteo NA | NA | NA | NA | 836 | 4 | 832 [Error: < 10 cases or controls] |
| 270 Disorders o NA    | NA | NA | NA | 915 | 4 | 911 [Error: < 10 cases or controls] |
| 270.3 Disorders o NA  | NA | NA | NA | 915 | 4 | 911 [Error: < 10 cases or controls] |
| 513.8 Disorders o NA  | NA | NA | NA | 909 | 4 | 905 [Error: < 10 cases or controls] |
| 112 Candidiasis NA    | NA | NA | NA | 835 | 4 | 831 [Error: < 10 cases or controls] |
| 722.8 Postlamine NA   | NA | NA | NA | 742 | 4 | 738 [Error: < 10 cases or controls] |
| 300.9 Posttrauma NA   | NA | NA | NA | 716 | 5 | 711 [Error: < 10 cases or controls] |
| 555.1 Regional er NA  | NA | NA | NA | 712 | 5 | 707 [Error: < 10 cases or controls] |
| 327.31 Central/nor NA | NA | NA | NA | 681 | 5 | 676 [Error: < 10 cases or controls] |
| 706.8 Other speci NA  | NA | NA | NA | 844 | 5 | 839 [Error: < 10 cases or controls] |
| 579.8 Nonspecific NA  | NA | NA | NA | 801 | 5 | 796 [Error: < 10 cases or controls] |
| 523.1 Gingivitis NA   | NA | NA | NA | 901 | 5 | 896 [Error: < 10 cases or controls] |
| 279.7 Other immı NA   | NA | NA | NA | 895 | 5 | 890 [Error: < 10 cases or controls] |
| 313.1 Attention d NA  | NA | NA | NA | 928 | 5 | 923 [Error: < 10 cases or controls] |
| 313 Pervasive d NA    | NA | NA | NA | 928 | 5 | 923 [Error: < 10 cases or controls] |
| 244.2 Acquired hı NA  | NA | NA | NA | 835 | 5 | 830 [Error: < 10 cases or controls] |
| 374.3 Ptosis of ey NA | NA | NA | NA | 787 | 5 | 782 [Error: < 10 cases or controls] |
| 274.2 Crystal arth NA | NA | NA | NA | 860 | 5 | 855 [Error: < 10 cases or controls] |
| 758 Chromoson NA      | NA | NA | NA | 925 | 5 | 920 [Error: < 10 cases or controls] |
| 946 Anaphylact NA     | NA | NA | NA | 795 | 5 | 790 [Error: < 10 cases or controls] |
| 781 Symptoms i NA     | NA | NA | NA | 918 | 5 | 913 [Error: < 10 cases or controls] |
| 357 Inflammato NA     | NA | NA | NA | 879 | 5 | 874 [Error: < 10 cases or controls] |
| 560.4 Other intes NA  | NA | NA | NA | 712 | 5 | 707 [Error: < 10 cases or controls] |
| 612 Breast conc NA    | NA | NA | NA | 925 | 5 | 920 [Error: < 10 cases or controls] |
| 612.2 Hypertroph NA   | NA | NA | NA | 925 | 5 | 920 [Error: < 10 cases or controls] |
| 803.3 Fracture of NA  | NA | NA | NA | 871 | 5 | 866 [Error: < 10 cases or controls] |
| 771.2 Cramp of liı NA | NA | NA | NA | 872 | 5 | 867 [Error: < 10 cases or controls] |
| 54 Herpes sim NA      | NA | NA | NA | 814 | 5 | 809 [Error: < 10 cases or controls] |

|                     |    |    |    |     |   |                                     |
|---------------------|----|----|----|-----|---|-------------------------------------|
| 743.12 Senile osteo | NA | NA | NA | 868 | 5 | 863 [Error: < 10 cases or controls] |
| 275.1 Disorders o   | NA | NA | NA | 898 | 5 | 893 [Error: < 10 cases or controls] |
| 531.2 Gastric ulce  | NA | NA | NA | 917 | 5 | 912 [Error: < 10 cases or controls] |
| 535.2 Atrophic ga   | NA | NA | NA | 879 | 5 | 874 [Error: < 10 cases or controls] |
| 375 Disorders o     | NA | NA | NA | 807 | 5 | 802 [Error: < 10 cases or controls] |
| 907 Injuries to t   | NA | NA | NA | 934 | 5 | 929 [Error: < 10 cases or controls] |
| 379.5 Disorders o   | NA | NA | NA | 807 | 5 | 802 [Error: < 10 cases or controls] |
| 592 Cystitis and    | NA | NA | NA | 821 | 5 | 816 [Error: < 10 cases or controls] |
| 726.2 Synoviopat    | NA | NA | NA | 716 | 5 | 711 [Error: < 10 cases or controls] |
| 227.2 Benign neo    | NA | NA | NA | 919 | 5 | 914 [Error: < 10 cases or controls] |
| 597 Other disor     | NA | NA | NA | 899 | 5 | 894 [Error: < 10 cases or controls] |
| 276.6 Fluid overlc  | NA | NA | NA | 811 | 5 | 806 [Error: < 10 cases or controls] |
| 353.2 Nerve root    | NA | NA | NA | 846 | 5 | 841 [Error: < 10 cases or controls] |
| 353 Nerve root      | NA | NA | NA | 846 | 5 | 841 [Error: < 10 cases or controls] |
| 478 Throat pain     | NA | NA | NA | 697 | 5 | 692 [Error: < 10 cases or controls] |
| 386.1 Meniere's c   | NA | NA | NA | 777 | 5 | 772 [Error: < 10 cases or controls] |
| 700 Corns and c     | NA | NA | NA | 849 | 5 | 844 [Error: < 10 cases or controls] |
| 245.2 Chronic thy   | NA | NA | NA | 835 | 5 | 830 [Error: < 10 cases or controls] |
| 374.1 Ectropion o   | NA | NA | NA | 787 | 5 | 782 [Error: < 10 cases or controls] |
| 359 Muscular d      | NA | NA | NA | 879 | 5 | 874 [Error: < 10 cases or controls] |
| 359.2 Myopathy      | NA | NA | NA | 879 | 5 | 874 [Error: < 10 cases or controls] |
| 426.22 Mobitz II A  | NA | NA | NA | 354 | 5 | 349 [Error: < 10 cases or controls] |
| 210 Benign neo      | NA | NA | NA | 927 | 5 | 922 [Error: < 10 cases or controls] |
| 560.1 Paralytic ile | NA | NA | NA | 712 | 5 | 707 [Error: < 10 cases or controls] |
| 195 Cancer, sus     | NA | NA | NA | 843 | 5 | 838 [Error: < 10 cases or controls] |
| 701.1 Keratodern    | NA | NA | NA | 849 | 5 | 844 [Error: < 10 cases or controls] |
| 531.4 Peptic ulce   | NA | NA | NA | 917 | 5 | 912 [Error: < 10 cases or controls] |
| 603.2 Spermatoc     | NA | NA | NA | 640 | 5 | 635 [Error: < 10 cases or controls] |
| 250.23 Type 2 diab  | NA | NA | NA | 670 | 5 | 665 [Error: < 10 cases or controls] |
| 575.6 Cholesterol   | NA | NA | NA | 896 | 5 | 891 [Error: < 10 cases or controls] |
| 456 Chronic ver     | NA | NA | NA | 712 | 5 | 707 [Error: < 10 cases or controls] |
| 710.1 Osteomyeli    | NA | NA | NA | 837 | 5 | 832 [Error: < 10 cases or controls] |
| 281.12 Other vitan  | NA | NA | NA | 894 | 5 | 889 [Error: < 10 cases or controls] |

|                    |    |    |    |     |   |                                     |
|--------------------|----|----|----|-----|---|-------------------------------------|
| 477 Epistaxis or   | NA | NA | NA | 697 | 5 | 692 [Error: < 10 cases or controls] |
| 698 Pruritus an    | NA | NA | NA | 917 | 5 | 912 [Error: < 10 cases or controls] |
| 471 Nasal polyp    | NA | NA | NA | 697 | 5 | 692 [Error: < 10 cases or controls] |
| 145 Cancer of r    | NA | NA | NA | 927 | 5 | 922 [Error: < 10 cases or controls] |
| 276.41 Acidosis    | NA | NA | NA | 812 | 6 | 806 [Error: < 10 cases or controls] |
| 963 Poisoning b    | NA | NA | NA | 845 | 6 | 839 [Error: < 10 cases or controls] |
| 963.1 Antineopla   | NA | NA | NA | 845 | 6 | 839 [Error: < 10 cases or controls] |
| 568.1 Peritoneal   | NA | NA | NA | 844 | 6 | 838 [Error: < 10 cases or controls] |
| 568 Other disor    | NA | NA | NA | 844 | 6 | 838 [Error: < 10 cases or controls] |
| 81 Infection/ir    | NA | NA | NA | 930 | 6 | 924 [Error: < 10 cases or controls] |
| 364 Corneal op     | NA | NA | NA | 838 | 6 | 832 [Error: < 10 cases or controls] |
| 41.1 Staphyloco    | NA | NA | NA | 919 | 6 | 913 [Error: < 10 cases or controls] |
| 738.4 Acquired s   | NA | NA | NA | 860 | 6 | 854 [Error: < 10 cases or controls] |
| 527 Diseases of    | NA | NA | NA | 903 | 6 | 897 [Error: < 10 cases or controls] |
| 331.9 Cerebral de  | NA | NA | NA | 829 | 6 | 823 [Error: < 10 cases or controls] |
| 70.9 Hepatitis N   | NA | NA | NA | 815 | 6 | 809 [Error: < 10 cases or controls] |
| 289.9 Abnormalit   | NA | NA | NA | 849 | 6 | 843 [Error: < 10 cases or controls] |
| 798.1 Chronic fati | NA | NA | NA | 637 | 6 | 631 [Error: < 10 cases or controls] |
| 500 Lung diseas    | NA | NA | NA | 771 | 6 | 765 [Error: < 10 cases or controls] |
| 224.1 Benign neo   | NA | NA | NA | 919 | 6 | 913 [Error: < 10 cases or controls] |
| 555.2 Ulcerative   | NA | NA | NA | 713 | 6 | 707 [Error: < 10 cases or controls] |
| 807 Fracture of    | NA | NA | NA | 872 | 6 | 866 [Error: < 10 cases or controls] |
| 276.12 Hyposmola   | NA | NA | NA | 812 | 6 | 806 [Error: < 10 cases or controls] |
| 703.1 Ingrowing r  | NA | NA | NA | 883 | 6 | 877 [Error: < 10 cases or controls] |
| 736 Other acqu     | NA | NA | NA | 860 | 6 | 854 [Error: < 10 cases or controls] |
| 599.1 Urinary obs  | NA | NA | NA | 758 | 6 | 752 [Error: < 10 cases or controls] |
| 389.2 Conductive   | NA | NA | NA | 791 | 6 | 785 [Error: < 10 cases or controls] |
| 960.2 Allergy/adv  | NA | NA | NA | 845 | 6 | 839 [Error: < 10 cases or controls] |
| 960 Poisoning b    | NA | NA | NA | 845 | 6 | 839 [Error: < 10 cases or controls] |
| 801.1 Fracture of  | NA | NA | NA | 872 | 6 | 866 [Error: < 10 cases or controls] |
| 355.1 Chronic pai  | NA | NA | NA | 847 | 6 | 841 [Error: < 10 cases or controls] |
| 158 Neoplasm       | NA | NA | NA | 896 | 6 | 890 [Error: < 10 cases or controls] |
| 370.31 Keratoconji | NA | NA | NA | 788 | 6 | 782 [Error: < 10 cases or controls] |

|                    |    |    |    |     |   |                                     |
|--------------------|----|----|----|-----|---|-------------------------------------|
| 360 Disorders o    | NA | NA | NA | 838 | 6 | 832 [Error: < 10 cases or controls] |
| 378.1 Strabismus   | NA | NA | NA | 808 | 6 | 802 [Error: < 10 cases or controls] |
| 601.3 Orchitis anc | NA | NA | NA | 672 | 6 | 666 [Error: < 10 cases or controls] |
| 426.8 Other cardi  | NA | NA | NA | 355 | 6 | 349 [Error: < 10 cases or controls] |
| 335 Multiple scl   | NA | NA | NA | 829 | 6 | 823 [Error: < 10 cases or controls] |
| 363 Chorioretin    | NA | NA | NA | 838 | 6 | 832 [Error: < 10 cases or controls] |
| 473.3 Paralysis/sç | NA | NA | NA | 698 | 6 | 692 [Error: < 10 cases or controls] |
| 575.7 Other disor  | NA | NA | NA | 897 | 6 | 891 [Error: < 10 cases or controls] |
| 253.4 Anterior pit | NA | NA | NA | 825 | 6 | 819 [Error: < 10 cases or controls] |
| 743.2 Pathologic i | NA | NA | NA | 869 | 6 | 863 [Error: < 10 cases or controls] |
| 701.4 Keloid scar  | NA | NA | NA | 850 | 6 | 844 [Error: < 10 cases or controls] |
| 149.4 Cancer of lã | NA | NA | NA | 928 | 6 | 922 [Error: < 10 cases or controls] |
| 571.81 Portal hype | NA | NA | NA | 796 | 6 | 790 [Error: < 10 cases or controls] |
| 430.2 Intracerebr  | NA | NA | NA | 766 | 6 | 760 [Error: < 10 cases or controls] |
| 858 Complicatic    | NA | NA | NA | 869 | 6 | 863 [Error: < 10 cases or controls] |
| 295 Schizophreï    | NA | NA | NA | 717 | 6 | 711 [Error: < 10 cases or controls] |
| 217.1 Nevus, non   | NA | NA | NA | 809 | 6 | 803 [Error: < 10 cases or controls] |
| 172.3 Carcinoma    | NA | NA | NA | 763 | 6 | 757 [Error: < 10 cases or controls] |
| 342 Hemiplegia     | NA | NA | NA | 829 | 6 | 823 [Error: < 10 cases or controls] |
| 242.1 Graves' disç | NA | NA | NA | 836 | 6 | 830 [Error: < 10 cases or controls] |
| 191 Malignant ç    | NA | NA | NA | 919 | 6 | 913 [Error: < 10 cases or controls] |
| 362.6 Peripheral i | NA | NA | NA | 829 | 6 | 823 [Error: < 10 cases or controls] |
| 912 Insect bite    | NA | NA | NA | 910 | 6 | 904 [Error: < 10 cases or controls] |
| 292.11 Aphasia     | NA | NA | NA | 852 | 6 | 846 [Error: < 10 cases or controls] |
| 972 Poisoning b    | NA | NA | NA | 845 | 6 | 839 [Error: < 10 cases or controls] |
| 276.4 Acid-base b  | NA | NA | NA | 813 | 7 | 806 [Error: < 10 cases or controls] |
| 797 Shock          | NA | NA | NA | 935 | 7 | 928 [Error: < 10 cases or controls] |
| 458.1 Orthostatic  | NA | NA | NA | 865 | 7 | 858 [Error: < 10 cases or controls] |
| 346.1 Nonspecific  | NA | NA | NA | 830 | 7 | 823 [Error: < 10 cases or controls] |
| 535.6 Duodenitis   | NA | NA | NA | 881 | 7 | 874 [Error: < 10 cases or controls] |
| 509.8 Dependenc    | NA | NA | NA | 772 | 7 | 765 [Error: < 10 cases or controls] |
| 540.1 Appendiciti  | NA | NA | NA | 935 | 7 | 928 [Error: < 10 cases or controls] |
| 540.11 Acute appe  | NA | NA | NA | 935 | 7 | 928 [Error: < 10 cases or controls] |

|                      |    |    |    |     |   |                                     |
|----------------------|----|----|----|-----|---|-------------------------------------|
| 728 Disorders o      | NA | NA | NA | 718 | 7 | 711 [Error: < 10 cases or controls] |
| 738 Other acqu       | NA | NA | NA | 861 | 7 | 854 [Error: < 10 cases or controls] |
| 395.3 Nonrheum       | NA | NA | NA | 677 | 7 | 670 [Error: < 10 cases or controls] |
| 433.11 Occlusion o   | NA | NA | NA | 767 | 7 | 760 [Error: < 10 cases or controls] |
| 504.1 Idiopathic f   | NA | NA | NA | 772 | 7 | 765 [Error: < 10 cases or controls] |
| 345.12 Partial epile | NA | NA | NA | 830 | 7 | 823 [Error: < 10 cases or controls] |
| 571.8 Liver absce    | NA | NA | NA | 797 | 7 | 790 [Error: < 10 cases or controls] |
| 327.41 Organic or    | NA | NA | NA | 683 | 7 | 676 [Error: < 10 cases or controls] |
| 38 Septicemia        | NA | NA | NA | 920 | 7 | 913 [Error: < 10 cases or controls] |
| 153.2 Colon canc     | NA | NA | NA | 724 | 7 | 717 [Error: < 10 cases or controls] |
| 526 Diseases of      | NA | NA | NA | 903 | 7 | 896 [Error: < 10 cases or controls] |
| 259.1 Nonspecific    | NA | NA | NA | 826 | 7 | 819 [Error: < 10 cases or controls] |
| 707.2 Chronic ulc    | NA | NA | NA | 930 | 7 | 923 [Error: < 10 cases or controls] |
| 723 Other disor      | NA | NA | NA | 745 | 7 | 738 [Error: < 10 cases or controls] |
| 332 Parkinson's      | NA | NA | NA | 830 | 7 | 823 [Error: < 10 cases or controls] |
| 255 Disorders o      | NA | NA | NA | 826 | 7 | 819 [Error: < 10 cases or controls] |
| 705.8 Hyperhidro     | NA | NA | NA | 846 | 7 | 839 [Error: < 10 cases or controls] |
| 530.3 Stricture an   | NA | NA | NA | 680 | 7 | 673 [Error: < 10 cases or controls] |
| 473.1 Chronic lar    | NA | NA | NA | 699 | 7 | 692 [Error: < 10 cases or controls] |
| 281.1 Megaloblas     | NA | NA | NA | 896 | 7 | 889 [Error: < 10 cases or controls] |
| 250.7 Diabetic ret   | NA | NA | NA | 830 | 7 | 823 [Error: < 10 cases or controls] |
| 198.4 Secondary      | NA | NA | NA | 845 | 7 | 838 [Error: < 10 cases or controls] |
| 578.9 Hemorrhag      | NA | NA | NA | 803 | 7 | 796 [Error: < 10 cases or controls] |
| 574.3 Cholecystiti   | NA | NA | NA | 898 | 7 | 891 [Error: < 10 cases or controls] |
| 250.14 Type 1 diab   | NA | NA | NA | 672 | 7 | 665 [Error: < 10 cases or controls] |
| 411.41 Aneurysm      | NA | NA | NA | 381 | 7 | 374 [Error: < 10 cases or controls] |
| 681.3 Cellulitis an  | NA | NA | NA | 829 | 7 | 822 [Error: < 10 cases or controls] |
| 379.3 Aphakia an     | NA | NA | NA | 809 | 7 | 802 [Error: < 10 cases or controls] |
| 245 Thyroiditis      | NA | NA | NA | 837 | 7 | 830 [Error: < 10 cases or controls] |
| 214.1 Lipoma of s    | NA | NA | NA | 918 | 7 | 911 [Error: < 10 cases or controls] |
| 947 Urticaria        | NA | NA | NA | 797 | 7 | 790 [Error: < 10 cases or controls] |
| 110.13 Dermatoph     | NA | NA | NA | 838 | 7 | 831 [Error: < 10 cases or controls] |
| 603.1 Hydrocele      | NA | NA | NA | 642 | 7 | 635 [Error: < 10 cases or controls] |

|        |               |    |    |    |     |   |                                     |
|--------|---------------|----|----|----|-----|---|-------------------------------------|
| 367.8  | Hypermetr     | NA | NA | NA | 868 | 7 | 861 [Error: < 10 cases or controls] |
| 149    | Cancer of l   | NA | NA | NA | 929 | 7 | 922 [Error: < 10 cases or controls] |
| 275.3  | Disorders o   | NA | NA | NA | 900 | 7 | 893 [Error: < 10 cases or controls] |
| 710    | Osteomyeli    | NA | NA | NA | 839 | 7 | 832 [Error: < 10 cases or controls] |
| 288.2  | Elevated w    | NA | NA | NA | 850 | 7 | 843 [Error: < 10 cases or controls] |
| 260    | Protein-cal   | NA | NA | NA | 855 | 8 | 847 [Error: < 10 cases or controls] |
| 530.9  | Heartburn     | NA | NA | NA | 681 | 8 | 673 [Error: < 10 cases or controls] |
| 198.2  | Secondary i   | NA | NA | NA | 846 | 8 | 838 [Error: < 10 cases or controls] |
| 870.3  | Other open    | NA | NA | NA | 869 | 8 | 861 [Error: < 10 cases or controls] |
| 540    | Appendice     | NA | NA | NA | 936 | 8 | 928 [Error: < 10 cases or controls] |
| 215    | Other beni    | NA | NA | NA | 919 | 8 | 911 [Error: < 10 cases or controls] |
| 819    | Skull and fa  | NA | NA | NA | 925 | 8 | 917 [Error: < 10 cases or controls] |
| 427.61 | Supraventri   | NA | NA | NA | 357 | 8 | 349 [Error: < 10 cases or controls] |
| 370.3  | Keratoconji   | NA | NA | NA | 790 | 8 | 782 [Error: < 10 cases or controls] |
| 426.23 | Second deg    | NA | NA | NA | 357 | 8 | 349 [Error: < 10 cases or controls] |
| 251.1  | Hypoglycen    | NA | NA | NA | 608 | 8 | 600 [Error: < 10 cases or controls] |
| 577    | Diseases of   | NA | NA | NA | 934 | 8 | 926 [Error: < 10 cases or controls] |
| 562.2  | Diverticuliti | NA | NA | NA | 715 | 8 | 707 [Error: < 10 cases or controls] |
| 426.4  | Anomalous     | NA | NA | NA | 357 | 8 | 349 [Error: < 10 cases or controls] |
| 535.8  | Other speci   | NA | NA | NA | 882 | 8 | 874 [Error: < 10 cases or controls] |
| 709    | Diffuse dise  | NA | NA | NA | 801 | 8 | 793 [Error: < 10 cases or controls] |
| 694.2  | Other dyscl   | NA | NA | NA | 805 | 8 | 797 [Error: < 10 cases or controls] |
| 694    | Dyschromia    | NA | NA | NA | 805 | 8 | 797 [Error: < 10 cases or controls] |
| 153    | Colorectal c  | NA | NA | NA | 725 | 8 | 717 [Error: < 10 cases or controls] |
| 252.1  | Hyperparat    | NA | NA | NA | 827 | 8 | 819 [Error: < 10 cases or controls] |
| 193    | Thyroid car   | NA | NA | NA | 922 | 8 | 914 [Error: < 10 cases or controls] |
| 367.9  | Blindness a   | NA | NA | NA | 869 | 8 | 861 [Error: < 10 cases or controls] |
| 300.12 | Agrophob      | NA | NA | NA | 719 | 8 | 711 [Error: < 10 cases or controls] |
| 530.5  | Disorders o   | NA | NA | NA | 681 | 8 | 673 [Error: < 10 cases or controls] |
| 704.8  | Other speci   | NA | NA | NA | 885 | 8 | 877 [Error: < 10 cases or controls] |
| 79     | Viral infecti | NA | NA | NA | 817 | 8 | 809 [Error: < 10 cases or controls] |
| 71     | Human imn     | NA | NA | NA | 817 | 8 | 809 [Error: < 10 cases or controls] |
| 71.1   | HIV infectic  | NA | NA | NA | 817 | 8 | 809 [Error: < 10 cases or controls] |



|        |               |    |    |    |     |   |                                     |
|--------|---------------|----|----|----|-----|---|-------------------------------------|
| 224    | Benign neo    | NA | NA | NA | 921 | 8 | 913 [Error: < 10 cases or controls] |
| 214    | Lipoma        | NA | NA | NA | 919 | 8 | 911 [Error: < 10 cases or controls] |
| 395.6  | Heart valve   | NA | NA | NA | 678 | 8 | 670 [Error: < 10 cases or controls] |
| 586.4  | Stricture/ol  | NA | NA | NA | 812 | 8 | 804 [Error: < 10 cases or controls] |
| 362.4  | Retinal vasc  | NA | NA | NA | 831 | 8 | 823 [Error: < 10 cases or controls] |
| 275.51 | Hypocalcemia  | NA | NA | NA | 901 | 8 | 893 [Error: < 10 cases or controls] |
| 395.4  | Nonrheumatoid | NA | NA | NA | 678 | 8 | 670 [Error: < 10 cases or controls] |
| 189.21 | Malignant r   | NA | NA | NA | 919 | 8 | 911 [Error: < 10 cases or controls] |
| 189.2  | Cancer of b   | NA | NA | NA | 919 | 8 | 911 [Error: < 10 cases or controls] |
| 564.1  | Irritable Bo  | NA | NA | NA | 715 | 8 | 707 [Error: < 10 cases or controls] |
| 281    | Other defic   | NA | NA | NA | 897 | 8 | 889 [Error: < 10 cases or controls] |
| 433.12 | Cerebral at   | NA | NA | NA | 768 | 8 | 760 [Error: < 10 cases or controls] |
| 369.5  | Conjunctivi   | NA | NA | NA | 790 | 8 | 782 [Error: < 10 cases or controls] |
| 440.1  | Atheroscler   | NA | NA | NA | 753 | 8 | 745 [Error: < 10 cases or controls] |
| 250.25 | Diabetes ty   | NA | NA | NA | 673 | 8 | 665 [Error: < 10 cases or controls] |
| 110.12 | Althete's fo  | NA | NA | NA | 839 | 8 | 831 [Error: < 10 cases or controls] |
| 429.1  | Heart trans   | NA | NA | NA | 598 | 9 | 589 [Error: < 10 cases or controls] |
| 539    | Bariatric su  | NA | NA | NA | 934 | 9 | 925 [Error: < 10 cases or controls] |
| 348    | Other cond    | NA | NA | NA | 832 | 9 | 823 [Error: < 10 cases or controls] |
| 427.42 | Cardiac arr   | NA | NA | NA | 358 | 9 | 349 [Error: < 10 cases or controls] |
| 217    | Vascular ha   | NA | NA | NA | 812 | 9 | 803 [Error: < 10 cases or controls] |
| 555    | Inflammatc    | NA | NA | NA | 716 | 9 | 707 [Error: < 10 cases or controls] |
| 800    | Fracture of   | NA | NA | NA | 875 | 9 | 866 [Error: < 10 cases or controls] |
| 707    | Chronic ulc   | NA | NA | NA | 932 | 9 | 923 [Error: < 10 cases or controls] |
| 331    | Other cere    | NA | NA | NA | 832 | 9 | 823 [Error: < 10 cases or controls] |
| 211    | Benign neo    | NA | NA | NA | 913 | 9 | 904 [Error: < 10 cases or controls] |
| 516.1  | Hemoptysis    | NA | NA | NA | 930 | 9 | 921 [Error: < 10 cases or controls] |
| 516    | Abnormal s    | NA | NA | NA | 930 | 9 | 921 [Error: < 10 cases or controls] |
| 352    | Disorders o   | NA | NA | NA | 850 | 9 | 841 [Error: < 10 cases or controls] |
| 443.8  | Other speci   | NA | NA | NA | 754 | 9 | 745 [Error: < 10 cases or controls] |
| 345.1  | Epilepsy      | NA | NA | NA | 832 | 9 | 823 [Error: < 10 cases or controls] |
| 703    | Diseases of   | NA | NA | NA | 886 | 9 | 877 [Error: < 10 cases or controls] |
| 275.6  | Hypercalce    | NA | NA | NA | 902 | 9 | 893 [Error: < 10 cases or controls] |

|                     |    |    |    |     |    |     |                                            |
|---------------------|----|----|----|-----|----|-----|--------------------------------------------|
| 259 Other endo      | NA | NA | NA | 828 | 9  | 819 | [Error: < 10 cases or controls]            |
| 369.2 Eye infectio  | NA | NA | NA | 791 | 9  | 782 | [Error: < 10 cases or controls]            |
| 350.1 Abnormal i    | NA | NA | NA | 892 | 9  | 883 | [Error: < 10 cases or controls]            |
| 681.1 Cellulitis an | NA | NA | NA | 831 | 9  | 822 | [Error: < 10 cases or controls]            |
| 803.2 Fracture of   | NA | NA | NA | 875 | 9  | 866 | [Error: < 10 cases or controls]            |
| 580 Nephritis; r    | NA | NA | NA | 813 | 9  | 804 | [Error: < 10 cases or controls]            |
| 300.11 Generalizec  | NA | NA | NA | 720 | 9  | 711 | [Error: < 10 cases or controls]            |
| 840.3 Joint/ligam   | NA | NA | NA | 820 | 9  | 811 | [Error: < 10 cases or controls]            |
| 601.12 Chronic prc  | NA | NA | NA | 675 | 9  | 666 | [Error: < 10 cases or controls]            |
| 430 Intracranial    | NA | NA | NA | 769 | 9  | 760 | [Error: < 10 cases or controls]            |
| 289 Other disea     | NA | NA | NA | 852 | 9  | 843 | [Error: < 10 cases or controls]            |
| 859 Complicatic     | NA | NA | NA | 872 | 9  | 863 | [Error: < 10 cases or controls]            |
| 378 Strabismus      | NA | NA | NA | 811 | 9  | 802 | [Error: < 10 cases or controls]            |
| 228.1 Hemangion     | NA | NA | NA | 913 | 9  | 904 | [Error: < 10 cases or controls]            |
| 241.1 Nontoxic ur   | NA | NA | NA | 839 | 9  | 830 | [Error: < 10 cases or controls]            |
| 277.7 Dysmetabo     | NA | NA | NA | 906 | 9  | 897 | [Error: < 10 cases or controls]            |
| 523 Gingival an     | NA | NA | NA | 905 | 9  | 896 | [Error: < 10 cases or controls]            |
| 253 Disorders o     | NA | NA | NA | 828 | 9  | 819 | [Error: < 10 cases or controls]            |
| 361.1 Retinal det   | NA | NA | NA | 841 | 9  | 832 | [Error: < 10 cases or controls]            |
| 724 Other and t     | NA | NA | NA | 747 | 9  | 738 | [Error: < 10 cases or controls]            |
| 715 Other inflar    | NA | NA | NA | 827 | 9  | 818 | [Error: < 10 cases or controls]            |
| 252 Disorders o     | NA | NA | NA | 828 | 9  | 819 | [Error: < 10 cases or controls]            |
| 362.21 Macular de   | NA | NA | NA | 832 | 9  | 823 | [Error: < 10 cases or controls]            |
| 509.2 Respiratory   | NA | NA | NA | 774 | 9  | 765 | [Error: < 10 cases or controls]            |
| 611.1 Abnormal r    | NA | NA | NA | 920 | NA | NA  | [Error: non-varying phenotype or genotype] |
| 687 Symptoms i      | NA | NA | NA | 777 | NA | NA  | [Error: non-varying phenotype or genotype] |
| 259.3 Delay in se   | NA | NA | NA | 819 | NA | NA  | [Error: non-varying phenotype or genotype] |
| 755.6 Other cong    | NA | NA | NA | 923 | NA | NA  | [Error: non-varying phenotype or genotype] |
| 620 Dysplasia o     | NA | NA | NA | 937 | NA | NA  | [Error: non-varying phenotype or genotype] |
| 164 Cancer of ir    | NA | NA | NA | 925 | NA | NA  | [Error: non-varying phenotype or genotype] |
| 614.54 Abscess or   | NA | NA | NA | 937 | NA | NA  | [Error: non-varying phenotype or genotype] |
| 384.1 Myringitis    | NA | NA | NA | 841 | NA | NA  | [Error: non-varying phenotype or genotype] |
| 525.2 Atrophy of    | NA | NA | NA | 896 | NA | NA  | [Error: non-varying phenotype or genotype] |

|                                     |    |    |    |     |    |                                            |
|-------------------------------------|----|----|----|-----|----|--------------------------------------------|
| 615 Endometriosis                   | NA | NA | NA | 937 | NA | [Error: non-varying phenotype or genotype] |
| 41.2 Streptococcal                  | NA | NA | NA | 913 | NA | [Error: non-varying phenotype or genotype] |
| 441.2 Chronic vasculitis            | NA | NA | NA | 745 | NA | [Error: non-varying phenotype or genotype] |
| 149.2 Cancer of the nose            | NA | NA | NA | 922 | NA | [Error: non-varying phenotype or genotype] |
| 592.3 Urethral stricture            | NA | NA | NA | 816 | NA | [Error: non-varying phenotype or genotype] |
| 276.8 Polydipsia                    | NA | NA | NA | 806 | NA | [Error: non-varying phenotype or genotype] |
| 526.3 Anomalies of the ear          | NA | NA | NA | 896 | NA | [Error: non-varying phenotype or genotype] |
| 159.4 Malignant rhabdomyosarcoma    | NA | NA | NA | 890 | NA | [Error: non-varying phenotype or genotype] |
| 657 Infections of the skin          | NA | NA | NA | 937 | NA | [Error: non-varying phenotype or genotype] |
| 130 Spirochetes                     | NA | NA | NA | 929 | NA | [Error: non-varying phenotype or genotype] |
| 117.4 Aspergillosis                 | NA | NA | NA | 831 | NA | [Error: non-varying phenotype or genotype] |
| 791 Gangrene                        | NA | NA | NA | 937 | NA | [Error: non-varying phenotype or genotype] |
| 521.2 Dental abscess                | NA | NA | NA | 896 | NA | [Error: non-varying phenotype or genotype] |
| 260.1 Cachexia                      | NA | NA | NA | 847 | NA | [Error: non-varying phenotype or genotype] |
| 303.1 Dissociative disorder         | NA | NA | NA | 711 | NA | [Error: non-varying phenotype or genotype] |
| 613.1 Inflammatory bowel disease    | NA | NA | NA | 931 | NA | [Error: non-varying phenotype or genotype] |
| 728.2 Laxity of ligaments           | NA | NA | NA | 711 | NA | [Error: non-varying phenotype or genotype] |
| 184.1 Malignant rhabdomyosarcoma    | NA | NA | NA | 937 | NA | [Error: non-varying phenotype or genotype] |
| 988 Toxic effect of drugs           | NA | NA | NA | 932 | NA | [Error: non-varying phenotype or genotype] |
| 174.2 Breast cancer                 | NA | NA | NA | 935 | NA | [Error: non-varying phenotype or genotype] |
| 198.5 Secondary hyperparathyroidism | NA | NA | NA | 838 | NA | [Error: non-varying phenotype or genotype] |
| 130.1 Lyme disease                  | NA | NA | NA | 929 | NA | [Error: non-varying phenotype or genotype] |
| 621 Endometriosis                   | NA | NA | NA | 937 | NA | [Error: non-varying phenotype or genotype] |
| 619.2 Disorders of the eye          | NA | NA | NA | 937 | NA | [Error: non-varying phenotype or genotype] |
| 446.3 Hypersensitivity              | NA | NA | NA | 745 | NA | [Error: non-varying phenotype or genotype] |
| 958.1 Postoperative                 | NA | NA | NA | 932 | NA | [Error: non-varying phenotype or genotype] |
| 446.9 Arteritis                     | NA | NA | NA | 745 | NA | [Error: non-varying phenotype or genotype] |
| 626.15 Infertility, female          | NA | NA | NA | 937 | NA | [Error: non-varying phenotype or genotype] |
| 286.13 Congenital                   | NA | NA | NA | 701 | NA | [Error: non-varying phenotype or genotype] |
| 446.8 Thrombotic                    | NA | NA | NA | 745 | NA | [Error: non-varying phenotype or genotype] |
| 627.22 Need for hormone             | NA | NA | NA | 937 | NA | [Error: non-varying phenotype or genotype] |
| 655 Known or suspected              | NA | NA | NA | 937 | NA | [Error: non-varying phenotype or genotype] |
| 577.2 Chronic paronychia            | NA | NA | NA | 926 | NA | [Error: non-varying phenotype or genotype] |

|                                                        |    |    |    |     |    |                                            |
|--------------------------------------------------------|----|----|----|-----|----|--------------------------------------------|
| 871.3 Open wound                                       | NA | NA | NA | 861 | NA | [Error: non-varying phenotype or genotype] |
| 709.6 Other specified                                  | NA | NA | NA | 793 | NA | [Error: non-varying phenotype or genotype] |
| 184 Cancer of oral cavity                              | NA | NA | NA | 937 | NA | [Error: non-varying phenotype or genotype] |
| 133 Arthropod-bite and insect                          | NA | NA | NA | 929 | NA | [Error: non-varying phenotype or genotype] |
| 756.5 Congenital anomalies of the eye                  | NA | NA | NA | 923 | NA | [Error: non-varying phenotype or genotype] |
| 614.53 Cyst or abscess of the skin                     | NA | NA | NA | 937 | NA | [Error: non-varying phenotype or genotype] |
| 620.1 Dysplasia of the skin                            | NA | NA | NA | 937 | NA | [Error: non-varying phenotype or genotype] |
| 736.1 Acquired dermatitis                              | NA | NA | NA | 854 | NA | [Error: non-varying phenotype or genotype] |
| 204.12 Lymphoid leukemia                               | NA | NA | NA | 927 | NA | [Error: non-varying phenotype or genotype] |
| 306.1 Mental disorders                                 | NA | NA | NA | 711 | NA | [Error: non-varying phenotype or genotype] |
| 961 Poisoning by drugs                                 | NA | NA | NA | 839 | NA | [Error: non-varying phenotype or genotype] |
| 368.91 Psychophysics                                   | NA | NA | NA | 859 | NA | [Error: non-varying phenotype or genotype] |
| 612.3 Congenital anomalies of the ear, nose and throat | NA | NA | NA | 920 | NA | [Error: non-varying phenotype or genotype] |
| 150 Cancer of the eye                                  | NA | NA | NA | 890 | NA | [Error: non-varying phenotype or genotype] |
| 444.2 Embolism and thrombosis                          | NA | NA | NA | 745 | NA | [Error: non-varying phenotype or genotype] |
| 614 Inflammatory diseases of the eye                   | NA | NA | NA | 937 | NA | [Error: non-varying phenotype or genotype] |
| 278.3 Localized allergic diseases                      | NA | NA | NA | 740 | NA | [Error: non-varying phenotype or genotype] |
| 204.22 Myeloid leukemia                                | NA | NA | NA | 927 | NA | [Error: non-varying phenotype or genotype] |
| 286.6 Defibrinogenic purpura                           | NA | NA | NA | 701 | NA | [Error: non-varying phenotype or genotype] |
| 870.6 Open wound                                       | NA | NA | NA | 861 | NA | [Error: non-varying phenotype or genotype] |
| 592.21 Urethral syphilis                               | NA | NA | NA | 816 | NA | [Error: non-varying phenotype or genotype] |
| 526.1 Cysts of the skin                                | NA | NA | NA | 896 | NA | [Error: non-varying phenotype or genotype] |
| 747.2 Congenital anomalies of the ear, nose and throat | NA | NA | NA | 877 | NA | [Error: non-varying phenotype or genotype] |
| 654.1 Abnormalities of the eye                         | NA | NA | NA | 937 | NA | [Error: non-varying phenotype or genotype] |
| 614.52 Vaginitis and cervicitis                        | NA | NA | NA | 937 | NA | [Error: non-varying phenotype or genotype] |
| 230 Kaposi's sarcoma                                   | NA | NA | NA | 937 | NA | [Error: non-varying phenotype or genotype] |
| 270.21 Disorders of the eye                            | NA | NA | NA | 911 | NA | [Error: non-varying phenotype or genotype] |
| 305.21 Anorexia nervosa                                | NA | NA | NA | 711 | NA | [Error: non-varying phenotype or genotype] |
| 480.3 Pneumonia                                        | NA | NA | NA | 789 | NA | [Error: non-varying phenotype or genotype] |
| 656.8 Perinatal jaundice                               | NA | NA | NA | 936 | NA | [Error: non-varying phenotype or genotype] |
| 31.1 Leprosy                                           | NA | NA | NA | 913 | NA | [Error: non-varying phenotype or genotype] |
| 527.1 Hypertrophy and hyperplasia                      | NA | NA | NA | 897 | NA | [Error: non-varying phenotype or genotype] |
| 729.7 Nontraumatic amputation                          | NA | NA | NA | 711 | NA | [Error: non-varying phenotype or genotype] |

|                     |    |    |    |     |    |                                            |
|---------------------|----|----|----|-----|----|--------------------------------------------|
| 79.9 Viremia, NC    | NA | NA | NA | 809 | NA | [Error: non-varying phenotype or genotype] |
| 202.2 Non-Hodgk     | NA | NA | NA | 927 | NA | [Error: non-varying phenotype or genotype] |
| 694.3 Vascular dis  | NA | NA | NA | 797 | NA | [Error: non-varying phenotype or genotype] |
| 729.3 Panniculitis  | NA | NA | NA | 711 | NA | [Error: non-varying phenotype or genotype] |
| 941 Adverse re      | NA | NA | NA | 790 | NA | [Error: non-varying phenotype or genotype] |
| 175 Acquired at     | NA | NA | NA | 930 | NA | [Error: non-varying phenotype or genotype] |
| 949.1 Diaper or n   | NA | NA | NA | 790 | NA | [Error: non-varying phenotype or genotype] |
| 327.6 Circadian r   | NA | NA | NA | 676 | NA | [Error: non-varying phenotype or genotype] |
| 756.22 Pectus carir | NA | NA | NA | 923 | NA | [Error: non-varying phenotype or genotype] |
| 284.1 Pancytoper    | NA | NA | NA | 889 | NA | [Error: non-varying phenotype or genotype] |
| 277.8 Carnitine d   | NA | NA | NA | 897 | NA | [Error: non-varying phenotype or genotype] |
| 383 Otosclerosi     | NA | NA | NA | 841 | NA | [Error: non-varying phenotype or genotype] |
| 187.1 Malignant r   | NA | NA | NA | 869 | NA | [Error: non-varying phenotype or genotype] |
| 519.8 Other disea   | NA | NA | NA | 891 | NA | [Error: non-varying phenotype or genotype] |
| 722.3 Schmorl's n   | NA | NA | NA | 738 | NA | [Error: non-varying phenotype or genotype] |
| 315.1 Learning di   | NA | NA | NA | 923 | NA | [Error: non-varying phenotype or genotype] |
| 385.3 Cholesteatc   | NA | NA | NA | 841 | NA | [Error: non-varying phenotype or genotype] |
| 649.1 Diabetes or   | NA | NA | NA | 937 | NA | [Error: non-varying phenotype or genotype] |
| 772.6 Facial weak   | NA | NA | NA | 872 | NA | [Error: non-varying phenotype or genotype] |
| 702.4 Degenerati    | NA | NA | NA | 726 | NA | [Error: non-varying phenotype or genotype] |
| 81.1 Graft-versu    | NA | NA | NA | 924 | NA | [Error: non-varying phenotype or genotype] |
| 691.1 Ichthyosis c  | NA | NA | NA | 797 | NA | [Error: non-varying phenotype or genotype] |
| 287.32 Secondary i  | NA | NA | NA | 701 | NA | [Error: non-varying phenotype or genotype] |
| 145.1 Cancer of li  | NA | NA | NA | 922 | NA | [Error: non-varying phenotype or genotype] |
| 656.1 Isoimmuniz    | NA | NA | NA | 936 | NA | [Error: non-varying phenotype or genotype] |
| 253.3 Diabetes in   | NA | NA | NA | 819 | NA | [Error: non-varying phenotype or genotype] |
| 334.21 Amyotroph    | NA | NA | NA | 823 | NA | [Error: non-varying phenotype or genotype] |
| 750.5 Congenital    | NA | NA | NA | 912 | NA | [Error: non-varying phenotype or genotype] |
| 983 Toxic effect    | NA | NA | NA | 932 | NA | [Error: non-varying phenotype or genotype] |
| 624.9 stress incor  | NA | NA | NA | 936 | NA | [Error: non-varying phenotype or genotype] |
| 253.11 Acromegaly   | NA | NA | NA | 819 | NA | [Error: non-varying phenotype or genotype] |
| 624.2 Atrophy of    | NA | NA | NA | 936 | NA | [Error: non-varying phenotype or genotype] |
| 259.8 Polyglandul   | NA | NA | NA | 819 | NA | [Error: non-varying phenotype or genotype] |

|                     |    |    |    |     |    |                                            |
|---------------------|----|----|----|-----|----|--------------------------------------------|
| 580.11 Proliferativ | NA | NA | NA | 804 | NA | [Error: non-varying phenotype or genotype] |
| 695.9 Unspecific    | NA | NA | NA | 797 | NA | [Error: non-varying phenotype or genotype] |
| 701.3 Circumscri    | NA | NA | NA | 844 | NA | [Error: non-varying phenotype or genotype] |
| 735.22 Claw toe (a  | NA | NA | NA | 854 | NA | [Error: non-varying phenotype or genotype] |
| 218 Benign neo      | NA | NA | NA | 908 | NA | [Error: non-varying phenotype or genotype] |
| 637 Short gesta     | NA | NA | NA | 936 | NA | [Error: non-varying phenotype or genotype] |
| 363.4 Choroidal d   | NA | NA | NA | 832 | NA | [Error: non-varying phenotype or genotype] |
| 634 Miscarriage     | NA | NA | NA | 936 | NA | [Error: non-varying phenotype or genotype] |
| 386.21 Central orig | NA | NA | NA | 772 | NA | [Error: non-varying phenotype or genotype] |
| 184.2 Cancer of o   | NA | NA | NA | 937 | NA | [Error: non-varying phenotype or genotype] |
| 218.2 Other beni    | NA | NA | NA | 908 | NA | [Error: non-varying phenotype or genotype] |
| 626.1 Irregular m   | NA | NA | NA | 937 | NA | [Error: non-varying phenotype or genotype] |
| 781.2 Abnormal ç    | NA | NA | NA | 913 | NA | [Error: non-varying phenotype or genotype] |
| 134.1 Intestinal h  | NA | NA | NA | 929 | NA | [Error: non-varying phenotype or genotype] |
| 737.1 Kyphosis (a   | NA | NA | NA | 854 | NA | [Error: non-varying phenotype or genotype] |
| 260.7 Polyphagia    | NA | NA | NA | 847 | NA | [Error: non-varying phenotype or genotype] |
| 580.14 Chronic glo  | NA | NA | NA | 804 | NA | [Error: non-varying phenotype or genotype] |
| 716.8 Palindromic   | NA | NA | NA | 832 | NA | [Error: non-varying phenotype or genotype] |
| 270.1 Disturbanc    | NA | NA | NA | 911 | NA | [Error: non-varying phenotype or genotype] |
| 938.1 Acute derm    | NA | NA | NA | 790 | NA | [Error: non-varying phenotype or genotype] |
| 131 Protozoan i     | NA | NA | NA | 929 | NA | [Error: non-varying phenotype or genotype] |
| 560.2 Impaction c   | NA | NA | NA | 707 | NA | [Error: non-varying phenotype or genotype] |
| 586.11 Small kidne  | NA | NA | NA | 804 | NA | [Error: non-varying phenotype or genotype] |
| 283 Acquired h      | NA | NA | NA | 889 | NA | [Error: non-varying phenotype or genotype] |
| 642 Hypertensic     | NA | NA | NA | 937 | NA | [Error: non-varying phenotype or genotype] |
| 480.11 Pneumococ    | NA | NA | NA | 789 | NA | [Error: non-varying phenotype or genotype] |
| 647.3 Major puer    | NA | NA | NA | 936 | NA | [Error: non-varying phenotype or genotype] |
| 132.1 Pediculosis   | NA | NA | NA | 929 | NA | [Error: non-varying phenotype or genotype] |
| 480.5 Bronchopn     | NA | NA | NA | 789 | NA | [Error: non-varying phenotype or genotype] |
| 291.1 Transient r   | NA | NA | NA | 846 | NA | [Error: non-varying phenotype or genotype] |
| 704.12 Telogen eff  | NA | NA | NA | 877 | NA | [Error: non-varying phenotype or genotype] |
| 359.1 Muscular d    | NA | NA | NA | 874 | NA | [Error: non-varying phenotype or genotype] |
| 618.1 Prolapse of   | NA | NA | NA | 936 | NA | [Error: non-varying phenotype or genotype] |

|                       |    |    |    |     |    |                                            |
|-----------------------|----|----|----|-----|----|--------------------------------------------|
| 626.4 Premenstr       | NA | NA | NA | 937 | NA | [Error: non-varying phenotype or genotype] |
| 965.3 Salicylates c   | NA | NA | NA | 839 | NA | [Error: non-varying phenotype or genotype] |
| 324.1 Jakob-Creuz     | NA | NA | NA | 929 | NA | [Error: non-varying phenotype or genotype] |
| 245.1 Thyroiditis, NA | NA | NA | NA | 830 | NA | [Error: non-varying phenotype or genotype] |
| 611.11 Mammography    | NA | NA | NA | 920 | NA | [Error: non-varying phenotype or genotype] |
| 636.1 Threatened      | NA | NA | NA | 936 | NA | [Error: non-varying phenotype or genotype] |
| 282.8 Other hemor     | NA | NA | NA | 889 | NA | [Error: non-varying phenotype or genotype] |
| 711.1 Pyogenic ar     | NA | NA | NA | 832 | NA | [Error: non-varying phenotype or genotype] |
| 741.5 Hemarthros      | NA | NA | NA | 823 | NA | [Error: non-varying phenotype or genotype] |
| 526.42 Arthralgia/c   | NA | NA | NA | 896 | NA | [Error: non-varying phenotype or genotype] |
| 292.12 Symbolic d     | NA | NA | NA | 846 | NA | [Error: non-varying phenotype or genotype] |
| 385.5 Tympanosc       | NA | NA | NA | 841 | NA | [Error: non-varying phenotype or genotype] |
| 283.21 Hemolytic-i    | NA | NA | NA | 889 | NA | [Error: non-varying phenotype or genotype] |
| 626.2 Dysmenorr       | NA | NA | NA | 937 | NA | [Error: non-varying phenotype or genotype] |
| 816 Cerebral lac      | NA | NA | NA | 917 | NA | [Error: non-varying phenotype or genotype] |
| 627.1 Postmenop       | NA | NA | NA | 937 | NA | [Error: non-varying phenotype or genotype] |
| 721.8 Other alliec    | NA | NA | NA | 738 | NA | [Error: non-varying phenotype or genotype] |
| 750.22 Congenital     | NA | NA | NA | 912 | NA | [Error: non-varying phenotype or genotype] |
| 976 Poisoning b       | NA | NA | NA | 839 | NA | [Error: non-varying phenotype or genotype] |
| 710.2 Periostitis     | NA | NA | NA | 832 | NA | [Error: non-varying phenotype or genotype] |
| 90.2 Gonococcal       | NA | NA | NA | 935 | NA | [Error: non-varying phenotype or genotype] |
| 221 Benign neo        | NA | NA | NA | 908 | NA | [Error: non-varying phenotype or genotype] |
| 752.1 Neural tub      | NA | NA | NA | 927 | NA | [Error: non-varying phenotype or genotype] |
| 656.4 Hemorrhag       | NA | NA | NA | 936 | NA | [Error: non-varying phenotype or genotype] |
| 628 Ovarian cys       | NA | NA | NA | 937 | NA | [Error: non-varying phenotype or genotype] |
| 8.7 Intestinal ir     | NA | NA | NA | 929 | NA | [Error: non-varying phenotype or genotype] |
| 199.4 Neurofibrom     | NA | NA | NA | 838 | NA | [Error: non-varying phenotype or genotype] |
| 622 Polyp of fer      | NA | NA | NA | 937 | NA | [Error: non-varying phenotype or genotype] |
| 750.11 Esophageal     | NA | NA | NA | 912 | NA | [Error: non-varying phenotype or genotype] |
| 145.4 Cancer of tl    | NA | NA | NA | 922 | NA | [Error: non-varying phenotype or genotype] |
| 187.8 Neoplasm c      | NA | NA | NA | 869 | NA | [Error: non-varying phenotype or genotype] |
| 270.31 Polyclonal f   | NA | NA | NA | 911 | NA | [Error: non-varying phenotype or genotype] |
| 965.2 Antirheum       | NA | NA | NA | 839 | NA | [Error: non-varying phenotype or genotype] |

|                     |    |    |    |     |    |                                            |
|---------------------|----|----|----|-----|----|--------------------------------------------|
| 789.1 Persistent v  | NA | NA | NA | 869 | NA | [Error: non-varying phenotype or genotype] |
| 984 Toxic effect    | NA | NA | NA | 932 | NA | [Error: non-varying phenotype or genotype] |
| 132 Infestation     | NA | NA | NA | 929 | NA | [Error: non-varying phenotype or genotype] |
| 573.3 Hepatomeg     | NA | NA | NA | 790 | NA | [Error: non-varying phenotype or genotype] |
| 442.8 Aneurysm c    | NA | NA | NA | 745 | NA | [Error: non-varying phenotype or genotype] |
| 731 Osteitis def    | NA | NA | NA | 830 | NA | [Error: non-varying phenotype or genotype] |
| 751.12 Congenital   | NA | NA | NA | 912 | NA | [Error: non-varying phenotype or genotype] |
| 823 Fracture of     | NA | NA | NA | 855 | NA | [Error: non-varying phenotype or genotype] |
| 446.1 Thromboan     | NA | NA | NA | 745 | NA | [Error: non-varying phenotype or genotype] |
| 704.11 Alopecia Ar  | NA | NA | NA | 877 | NA | [Error: non-varying phenotype or genotype] |
| 610.3 Fibrosclero:  | NA | NA | NA | 920 | NA | [Error: non-varying phenotype or genotype] |
| 695.22 Pemphigus    | NA | NA | NA | 797 | NA | [Error: non-varying phenotype or genotype] |
| 377.3 Optic neuroi  | NA | NA | NA | 802 | NA | [Error: non-varying phenotype or genotype] |
| 610.8 Other speci   | NA | NA | NA | 920 | NA | [Error: non-varying phenotype or genotype] |
| 262 Mineral def     | NA | NA | NA | 847 | NA | [Error: non-varying phenotype or genotype] |
| 256.1 Hyperestro    | NA | NA | NA | 819 | NA | [Error: non-varying phenotype or genotype] |
| 281.13 Folate-defic | NA | NA | NA | 889 | NA | [Error: non-varying phenotype or genotype] |
| 134 Helminthia:     | NA | NA | NA | 929 | NA | [Error: non-varying phenotype or genotype] |
| 365.5 Pseudoexfc    | NA | NA | NA | 832 | NA | [Error: non-varying phenotype or genotype] |
| 910 Superficial i   | NA | NA | NA | 936 | NA | [Error: non-varying phenotype or genotype] |
| 687.3 Changes in    | NA | NA | NA | 777 | NA | [Error: non-varying phenotype or genotype] |
| 972.2 Antilipemic   | NA | NA | NA | 839 | NA | [Error: non-varying phenotype or genotype] |
| 643 Excessive v     | NA | NA | NA | 937 | NA | [Error: non-varying phenotype or genotype] |
| 184.11 Malignant r  | NA | NA | NA | 937 | NA | [Error: non-varying phenotype or genotype] |
| 622.2 Mucous po     | NA | NA | NA | 937 | NA | [Error: non-varying phenotype or genotype] |
| 333.8 Other dege    | NA | NA | NA | 823 | NA | [Error: non-varying phenotype or genotype] |
| 385 Other disor     | NA | NA | NA | 841 | NA | [Error: non-varying phenotype or genotype] |
| 610.2 Fibroadeno    | NA | NA | NA | 920 | NA | [Error: non-varying phenotype or genotype] |
| 180.1 Cervical car  | NA | NA | NA | 936 | NA | [Error: non-varying phenotype or genotype] |
| 626.21 Mittelschm   | NA | NA | NA | 937 | NA | [Error: non-varying phenotype or genotype] |
| 649 Other cond      | NA | NA | NA | 937 | NA | [Error: non-varying phenotype or genotype] |
| 656.2 Respiratory   | NA | NA | NA | 936 | NA | [Error: non-varying phenotype or genotype] |
| 613.9 Breast diso   | NA | NA | NA | 931 | NA | [Error: non-varying phenotype or genotype] |



|                        |    |    |    |        |    |                                            |
|------------------------|----|----|----|--------|----|--------------------------------------------|
| 346.3 Nonspecific NA   | NA | NA | NA | 823 NA | NA | [Error: non-varying phenotype or genotype] |
| 647.1 Infections c NA  | NA | NA | NA | 936 NA | NA | [Error: non-varying phenotype or genotype] |
| 41.21 Rheumatic NA     | NA | NA | NA | 913 NA | NA | [Error: non-varying phenotype or genotype] |
| 264.9 Lack of nori NA  | NA | NA | NA | 847 NA | NA | [Error: non-varying phenotype or genotype] |
| 289.3 Personal hi: NA  | NA | NA | NA | 843 NA | NA | [Error: non-varying phenotype or genotype] |
| 795 Other and r NA     | NA | NA | NA | 932 NA | NA | [Error: non-varying phenotype or genotype] |
| 751.22 Other speci NA  | NA | NA | NA | 912 NA | NA | [Error: non-varying phenotype or genotype] |
| 264 Lack of nori NA    | NA | NA | NA | 847 NA | NA | [Error: non-varying phenotype or genotype] |
| 286.12 Congenital NA   | NA | NA | NA | 701 NA | NA | [Error: non-varying phenotype or genotype] |
| 284 Aplastic ane NA    | NA | NA | NA | 889 NA | NA | [Error: non-varying phenotype or genotype] |
| 674 Other comf NA      | NA | NA | NA | 937 NA | NA | [Error: non-varying phenotype or genotype] |
| 714.2 Juvenile rhe NA  | NA | NA | NA | 818 NA | NA | [Error: non-varying phenotype or genotype] |
| 960.3 Poisoning b NA   | NA | NA | NA | 839 NA | NA | [Error: non-varying phenotype or genotype] |
| 79.2 Infectious r NA   | NA | NA | NA | 809 NA | NA | [Error: non-varying phenotype or genotype] |
| 366.3 Traumatic c NA   | NA | NA | NA | 784 NA | NA | [Error: non-varying phenotype or genotype] |
| 599.7 Urethral dis NA  | NA | NA | NA | 752 NA | NA | [Error: non-varying phenotype or genotype] |
| 520.1 Hereditary NA    | NA | NA | NA | 896 NA | NA | [Error: non-varying phenotype or genotype] |
| 180.3 Cervical int NA  | NA | NA | NA | 936 NA | NA | [Error: non-varying phenotype or genotype] |
| 601.8 Other inflar NA  | NA | NA | NA | 666 NA | NA | [Error: non-varying phenotype or genotype] |
| 499 Cystic fibro: NA   | NA | NA | NA | 937 NA | NA | [Error: non-varying phenotype or genotype] |
| 618.6 Vaginal ent NA   | NA | NA | NA | 936 NA | NA | [Error: non-varying phenotype or genotype] |
| 285.8 Hemoglobin NA    | NA | NA | NA | 889 NA | NA | [Error: non-varying phenotype or genotype] |
| 313.2 Tics and stu NA  | NA | NA | NA | 923 NA | NA | [Error: non-varying phenotype or genotype] |
| 204.3 Monocytic   NA   | NA | NA | NA | 927 NA | NA | [Error: non-varying phenotype or genotype] |
| 264.2 Failure to tl NA | NA | NA | NA | 847 NA | NA | [Error: non-varying phenotype or genotype] |
| 526.8 Exostosis of NA  | NA | NA | NA | 896 NA | NA | [Error: non-varying phenotype or genotype] |
| 743.22 Pathologic f NA | NA | NA | NA | 863 NA | NA | [Error: non-varying phenotype or genotype] |
| 619.1 Noninflamr NA    | NA | NA | NA | 937 NA | NA | [Error: non-varying phenotype or genotype] |
| 723.1 Torticollis NA   | NA | NA | NA | 738 NA | NA | [Error: non-varying phenotype or genotype] |
| 204.4 Multiple m NA    | NA | NA | NA | 927 NA | NA | [Error: non-varying phenotype or genotype] |
| 303.31 Gastrointes NA  | NA | NA | NA | 711 NA | NA | [Error: non-varying phenotype or genotype] |
| 624.1 Dystrophy c NA   | NA | NA | NA | 936 NA | NA | [Error: non-varying phenotype or genotype] |
| 614.4 Inflammatic NA   | NA | NA | NA | 937 NA | NA | [Error: non-varying phenotype or genotype] |

|                         |    |    |    |        |    |                                            |
|-------------------------|----|----|----|--------|----|--------------------------------------------|
| 522.1 Pulpitis and NA   | NA | NA | NA | 896 NA | NA | [Error: non-varying phenotype or genotype] |
| 614.51 Cervicitis ar NA | NA | NA | NA | 937 NA | NA | [Error: non-varying phenotype or genotype] |
| 495.11 Chronic obse NA  | NA | NA | NA | 782 NA | NA | [Error: non-varying phenotype or genotype] |
| 614.3 Pelvic inflar NA  | NA | NA | NA | 937 NA | NA | [Error: non-varying phenotype or genotype] |
| 264.1 Short statui NA   | NA | NA | NA | 847 NA | NA | [Error: non-varying phenotype or genotype] |
| 795.82 Elevated ca NA   | NA | NA | NA | 932 NA | NA | [Error: non-varying phenotype or genotype] |
| 710.3 Osteopathy NA     | NA | NA | NA | 832 NA | NA | [Error: non-varying phenotype or genotype] |
| 634.1 Missed abo NA     | NA | NA | NA | 936 NA | NA | [Error: non-varying phenotype or genotype] |
| 283.2 Non-autoin NA     | NA | NA | NA | 889 NA | NA | [Error: non-varying phenotype or genotype] |
| 325 Phlebitis an NA     | NA | NA | NA | 929 NA | NA | [Error: non-varying phenotype or genotype] |
| 981 Toxic effect NA     | NA | NA | NA | 932 NA | NA | [Error: non-varying phenotype or genotype] |
| 381.3 Mastoiditis NA    | NA | NA | NA | 841 NA | NA | [Error: non-varying phenotype or genotype] |
| 81.11 Acute graft: NA   | NA | NA | NA | 924 NA | NA | [Error: non-varying phenotype or genotype] |
| 614.1 Pelvic perit: NA  | NA | NA | NA | 937 NA | NA | [Error: non-varying phenotype or genotype] |
| 580.13 Acute glom NA    | NA | NA | NA | 804 NA | NA | [Error: non-varying phenotype or genotype] |
| 635.3 Placenta pr NA    | NA | NA | NA | 936 NA | NA | [Error: non-varying phenotype or genotype] |
| 261.1 Vitamin A d NA    | NA | NA | NA | 847 NA | NA | [Error: non-varying phenotype or genotype] |
| 446.5 Giant cell a NA   | NA | NA | NA | 745 NA | NA | [Error: non-varying phenotype or genotype] |
| 656.5 Hematologi NA     | NA | NA | NA | 936 NA | NA | [Error: non-varying phenotype or genotype] |
| 754.1 Lumbosacr: NA     | NA | NA | NA | 923 NA | NA | [Error: non-varying phenotype or genotype] |
| 394.3 Aortic valve NA   | NA | NA | NA | 670 NA | NA | [Error: non-varying phenotype or genotype] |
| 586.12 Vesicouretr NA   | NA | NA | NA | 804 NA | NA | [Error: non-varying phenotype or genotype] |
| 79.1 Varicella ini NA   | NA | NA | NA | 809 NA | NA | [Error: non-varying phenotype or genotype] |
| 622.1 Polyp of coi NA   | NA | NA | NA | 937 NA | NA | [Error: non-varying phenotype or genotype] |
| 626.11 Absent or ir NA  | NA | NA | NA | 937 NA | NA | [Error: non-varying phenotype or genotype] |
| 284.2 Constitutioi NA   | NA | NA | NA | 889 NA | NA | [Error: non-varying phenotype or genotype] |
| 285.3 Sideroblast NA    | NA | NA | NA | 889 NA | NA | [Error: non-varying phenotype or genotype] |
| 389.5 Disorders o NA    | NA | NA | NA | 785 NA | NA | [Error: non-varying phenotype or genotype] |
| 711.2 Reiter's dis: NA  | NA | NA | NA | 832 NA | NA | [Error: non-varying phenotype or genotype] |
| 313.3 Autism NA         | NA | NA | NA | 923 NA | NA | [Error: non-varying phenotype or genotype] |
| 627.3 Postmenop NA      | NA | NA | NA | 937 NA | NA | [Error: non-varying phenotype or genotype] |
| 749.2 Congenital NA     | NA | NA | NA | 935 NA | NA | [Error: non-varying phenotype or genotype] |
| 251.8 Abnormalit NA     | NA | NA | NA | 819 NA | NA | [Error: non-varying phenotype or genotype] |

|                     |    |    |    |     |    |    |                                            |
|---------------------|----|----|----|-----|----|----|--------------------------------------------|
| 736.3 Acquired d    | NA | NA | NA | 854 | NA | NA | [Error: non-varying phenotype or genotype] |
| 740.12 Osteoarthr   | NA | NA | NA | 709 | NA | NA | [Error: non-varying phenotype or genotype] |
| 270.38 Other speci  | NA | NA | NA | 911 | NA | NA | [Error: non-varying phenotype or genotype] |
| 254 Diseases of     | NA | NA | NA | 819 | NA | NA | [Error: non-varying phenotype or genotype] |
| 255.22 Mineraloco   | NA | NA | NA | 819 | NA | NA | [Error: non-varying phenotype or genotype] |
| 733.6 Costochonc    | NA | NA | NA | 830 | NA | NA | [Error: non-varying phenotype or genotype] |
| 277.2 Other disor   | NA | NA | NA | 897 | NA | NA | [Error: non-varying phenotype or genotype] |
| 759.1 Anomalies     | NA | NA | NA | 920 | NA | NA | [Error: non-varying phenotype or genotype] |
| 275.2 Disorders o   | NA | NA | NA | 893 | NA | NA | [Error: non-varying phenotype or genotype] |
| 255.3 Adrenogeni    | NA | NA | NA | 819 | NA | NA | [Error: non-varying phenotype or genotype] |
| 174.3 Neoplasm c    | NA | NA | NA | 935 | NA | NA | [Error: non-varying phenotype or genotype] |
| 202.23 Lymphosar    | NA | NA | NA | 927 | NA | NA | [Error: non-varying phenotype or genotype] |
| 627.2 Symptomat     | NA | NA | NA | 937 | NA | NA | [Error: non-varying phenotype or genotype] |
| 634.3 Ectopic pre   | NA | NA | NA | 936 | NA | NA | [Error: non-varying phenotype or genotype] |
| 218.1 Uterine leic  | NA | NA | NA | 908 | NA | NA | [Error: non-varying phenotype or genotype] |
| 962.3 Hormones      | NA | NA | NA | 839 | NA | NA | [Error: non-varying phenotype or genotype] |
| 619 Noninflamr      | NA | NA | NA | 937 | NA | NA | [Error: non-varying phenotype or genotype] |
| 654 Other and       | NA | NA | NA | 937 | NA | NA | [Error: non-varying phenotype or genotype] |
| 625.1 Dyspareuni    | NA | NA | NA | 936 | NA | NA | [Error: non-varying phenotype or genotype] |
| 189.12 Malignant r  | NA | NA | NA | 911 | NA | NA | [Error: non-varying phenotype or genotype] |
| 870.8 Open woun     | NA | NA | NA | 861 | NA | NA | [Error: non-varying phenotype or genotype] |
| 368.7 Disorders o   | NA | NA | NA | 859 | NA | NA | [Error: non-varying phenotype or genotype] |
| 626.13 Irregular m  | NA | NA | NA | 937 | NA | NA | [Error: non-varying phenotype or genotype] |
| 656.26 Transitory t | NA | NA | NA | 936 | NA | NA | [Error: non-varying phenotype or genotype] |
| 874 Complicatic     | NA | NA | NA | 861 | NA | NA | [Error: non-varying phenotype or genotype] |
| 618.5 Prolapse of   | NA | NA | NA | 936 | NA | NA | [Error: non-varying phenotype or genotype] |
| 626.14 Irregular m  | NA | NA | NA | 937 | NA | NA | [Error: non-varying phenotype or genotype] |
| 756.21 Pectus exca  | NA | NA | NA | 923 | NA | NA | [Error: non-varying phenotype or genotype] |
| 627.5 Premature     | NA | NA | NA | 937 | NA | NA | [Error: non-varying phenotype or genotype] |
| 358.1 Myasthenia    | NA | NA | NA | 874 | NA | NA | [Error: non-varying phenotype or genotype] |
| 286.3 Coagulator    | NA | NA | NA | 701 | NA | NA | [Error: non-varying phenotype or genotype] |
| 614.31 Acute inflar | NA | NA | NA | 937 | NA | NA | [Error: non-varying phenotype or genotype] |
| 656.22 Interstitial | NA | NA | NA | 936 | NA | NA | [Error: non-varying phenotype or genotype] |

|                      |    |    |    |        |    |                                            |
|----------------------|----|----|----|--------|----|--------------------------------------------|
| 752 Nervous sys:     | NA | NA | NA | 927 NA | NA | [Error: non-varying phenotype or genotype] |
| 613.7 Other signs    | NA | NA | NA | 931 NA | NA | [Error: non-varying phenotype or genotype] |
| 960.1 Adverse eff    | NA | NA | NA | 839 NA | NA | [Error: non-varying phenotype or genotype] |
| 117.1 Histoplasm     | NA | NA | NA | 831 NA | NA | [Error: non-varying phenotype or genotype] |
| 536.7 Complicatic    | NA | NA | NA | 874 NA | NA | [Error: non-varying phenotype or genotype] |
| 753.2 Congenital     | NA | NA | NA | 927 NA | NA | [Error: non-varying phenotype or genotype] |
| 614.33 Pelvic inflar | NA | NA | NA | 937 NA | NA | [Error: non-varying phenotype or genotype] |
| 742.2 Pathologica    | NA | NA | NA | 823 NA | NA | [Error: non-varying phenotype or genotype] |
| 626.8 Infertility, f | NA | NA | NA | 937 NA | NA | [Error: non-varying phenotype or genotype] |
| 653 Problems a       | NA | NA | NA | 937 NA | NA | [Error: non-varying phenotype or genotype] |
| 300.8 Acute react    | NA | NA | NA | 711 NA | NA | [Error: non-varying phenotype or genotype] |
| 529.6 Glossodyn:     | NA | NA | NA | 897 NA | NA | [Error: non-varying phenotype or genotype] |
| 671 Venous/cer       | NA | NA | NA | 937 NA | NA | [Error: non-varying phenotype or genotype] |
| 301.1 Schizoid pe    | NA | NA | NA | 711 NA | NA | [Error: non-varying phenotype or genotype] |
| 627.4 Premenopa      | NA | NA | NA | 937 NA | NA | [Error: non-varying phenotype or genotype] |
| 521.4 Tooth com      | NA | NA | NA | 896 NA | NA | [Error: non-varying phenotype or genotype] |
| 656.6 Perinatal di   | NA | NA | NA | 936 NA | NA | [Error: non-varying phenotype or genotype] |
| 751.11 Congenital    | NA | NA | NA | 912 NA | NA | [Error: non-varying phenotype or genotype] |
| 987 Toxic effect     | NA | NA | NA | 932 NA | NA | [Error: non-varying phenotype or genotype] |
| 324 Other CNS i      | NA | NA | NA | 929 NA | NA | [Error: non-varying phenotype or genotype] |
| 446.2 Acute febril   | NA | NA | NA | 745 NA | NA | [Error: non-varying phenotype or genotype] |
| 512.3 Abnormal c     | NA | NA | NA | 397 NA | NA | [Error: non-varying phenotype or genotype] |
| 585.31 Renal dialy:  | NA | NA | NA | 804 NA | NA | [Error: non-varying phenotype or genotype] |
| 446.6 Polyarteriti   | NA | NA | NA | 745 NA | NA | [Error: non-varying phenotype or genotype] |
| 729.1 Rheumatiz      | NA | NA | NA | 711 NA | NA | [Error: non-varying phenotype or genotype] |
| 961.1 Poisoning/c    | NA | NA | NA | 839 NA | NA | [Error: non-varying phenotype or genotype] |
| 261.3 Vitamin C d    | NA | NA | NA | 847 NA | NA | [Error: non-varying phenotype or genotype] |
| 962.2 Insulins anc   | NA | NA | NA | 839 NA | NA | [Error: non-varying phenotype or genotype] |
| 971 Poisoning b      | NA | NA | NA | 839 NA | NA | [Error: non-varying phenotype or genotype] |
| 282.9 Other here     | NA | NA | NA | 889 NA | NA | [Error: non-varying phenotype or genotype] |
| 344 Other paral      | NA | NA | NA | 823 NA | NA | [Error: non-varying phenotype or genotype] |
| 741.6 Villonodula    | NA | NA | NA | 823 NA | NA | [Error: non-varying phenotype or genotype] |
| 722.9 Other and t    | NA | NA | NA | 738 NA | NA | [Error: non-varying phenotype or genotype] |

|                       |    |    |    |        |    |                                            |
|-----------------------|----|----|----|--------|----|--------------------------------------------|
| 749.1 Cleft palate NA | NA | NA | NA | 827 NA | NA | [Error: non-varying phenotype or genotype] |
| 201 Hodgkin's d NA    | NA | NA | NA | 927 NA | NA | [Error: non-varying phenotype or genotype] |
| 780 Hypotherm NA      | NA | NA | NA | 936 NA | NA | [Error: non-varying phenotype or genotype] |
| 149.1 Cancer of o NA  | NA | NA | NA | 922 NA | NA | [Error: non-varying phenotype or genotype] |
| 244.3 Iodine hypc NA  | NA | NA | NA | 830 NA | NA | [Error: non-varying phenotype or genotype] |
| 366.1 Nonsenile C NA  | NA | NA | NA | 784 NA | NA | [Error: non-varying phenotype or genotype] |
| 966 Poisoning b NA    | NA | NA | NA | 839 NA | NA | [Error: non-varying phenotype or genotype] |
| 305.2 Eating disor NA | NA | NA | NA | 711 NA | NA | [Error: non-varying phenotype or genotype] |
| 977 Personal hi: NA   | NA | NA | NA | 839 NA | NA | [Error: non-varying phenotype or genotype] |
| 939.1 Contact anc NA  | NA | NA | NA | 790 NA | NA | [Error: non-varying phenotype or genotype] |
| 792.1 Papanicola NA   | NA | NA | NA | 936 NA | NA | [Error: non-varying phenotype or genotype] |
| 272.14 Hyperchyl NA   | NA | NA | NA | 256 NA | NA | [Error: non-varying phenotype or genotype] |
| 277.1 Disorders o NA  | NA | NA | NA | 897 NA | NA | [Error: non-varying phenotype or genotype] |
| 627.21 Symptomat NA   | NA | NA | NA | 937 NA | NA | [Error: non-varying phenotype or genotype] |
| 286.1 Congenital NA   | NA | NA | NA | 701 NA | NA | [Error: non-varying phenotype or genotype] |
| 259.4 Precocious NA   | NA | NA | NA | 819 NA | NA | [Error: non-varying phenotype or genotype] |
| 716.3 Kaschin-Ber NA  | NA | NA | NA | 832 NA | NA | [Error: non-varying phenotype or genotype] |
| 220 Benign neo NA     | NA | NA | NA | 911 NA | NA | [Error: non-varying phenotype or genotype] |
| 271.9 Other disor NA  | NA | NA | NA | 935 NA | NA | [Error: non-varying phenotype or genotype] |
| 644 Anemia dur NA     | NA | NA | NA | 937 NA | NA | [Error: non-varying phenotype or genotype] |
| 957 Injury to ot NA   | NA | NA | NA | 937 NA | NA | [Error: non-varying phenotype or genotype] |
| 306.9 Tension he: NA  | NA | NA | NA | 711 NA | NA | [Error: non-varying phenotype or genotype] |
| 256.4 Polycystic c NA | NA | NA | NA | 819 NA | NA | [Error: non-varying phenotype or genotype] |
| 279.8 Other speci NA  | NA | NA | NA | 890 NA | NA | [Error: non-varying phenotype or genotype] |
| 636.8 Cervical inc NA | NA | NA | NA | 936 NA | NA | [Error: non-varying phenotype or genotype] |
| 750.13 Congenital NA  | NA | NA | NA | 912 NA | NA | [Error: non-varying phenotype or genotype] |
| 216.1 Screening f NA  | NA | NA | NA | 803 NA | NA | [Error: non-varying phenotype or genotype] |
| 323.2 Acute (tran NA  | NA | NA | NA | 929 NA | NA | [Error: non-varying phenotype or genotype] |
| 264.3 Delayed mi NA   | NA | NA | NA | 847 NA | NA | [Error: non-varying phenotype or genotype] |
| 696.2 Parapsorias NA  | NA | NA | NA | 797 NA | NA | [Error: non-varying phenotype or genotype] |
| 425.8 Other cardi NA  | NA | NA | NA | 761 NA | NA | [Error: non-varying phenotype or genotype] |
| 575.1 Cholangitis NA  | NA | NA | NA | 891 NA | NA | [Error: non-varying phenotype or genotype] |
| 655.1 Abnormalit NA   | NA | NA | NA | 937 NA | NA | [Error: non-varying phenotype or genotype] |

|                     |    |    |    |     |    |    |                                            |
|---------------------|----|----|----|-----|----|----|--------------------------------------------|
| 258.1 Postablativ   | NA | NA | NA | 819 | NA | NA | [Error: non-varying phenotype or genotype] |
| 270.11 Disturbanc   | NA | NA | NA | 911 | NA | NA | [Error: non-varying phenotype or genotype] |
| 520.2 Disturbanc    | NA | NA | NA | 896 | NA | NA | [Error: non-varying phenotype or genotype] |
| 737.2 Lordosis (ac  | NA | NA | NA | 854 | NA | NA | [Error: non-varying phenotype or genotype] |
| 792 Abnormal F      | NA | NA | NA | 936 | NA | NA | [Error: non-varying phenotype or genotype] |
| 446 Polyarteriti    | NA | NA | NA | 745 | NA | NA | [Error: non-varying phenotype or genotype] |
| 980 Encounter f     | NA | NA | NA | 928 | NA | NA | [Error: non-varying phenotype or genotype] |
| 117.3 Blastomyco    | NA | NA | NA | 831 | NA | NA | [Error: non-varying phenotype or genotype] |
| 350.5 Abnormal r    | NA | NA | NA | 883 | NA | NA | [Error: non-varying phenotype or genotype] |
| 618.2 Uterine/Utr   | NA | NA | NA | 936 | NA | NA | [Error: non-varying phenotype or genotype] |
| 459.7 Blood vess    | NA | NA | NA | 858 | NA | NA | [Error: non-varying phenotype or genotype] |
| 614.32 Chronic infl | NA | NA | NA | 937 | NA | NA | [Error: non-varying phenotype or genotype] |
| 756.2 Pectus and    | NA | NA | NA | 923 | NA | NA | [Error: non-varying phenotype or genotype] |
| 647 Infectious a    | NA | NA | NA | 936 | NA | NA | [Error: non-varying phenotype or genotype] |
| 180 Cervical car    | NA | NA | NA | 936 | NA | NA | [Error: non-varying phenotype or genotype] |
| 300.2 Generalizec   | NA | NA | NA | 711 | NA | NA | [Error: non-varying phenotype or genotype] |
| 586.1 Anatomical    | NA | NA | NA | 804 | NA | NA | [Error: non-varying phenotype or genotype] |
| 623 Hypertroph      | NA | NA | NA | 937 | NA | NA | [Error: non-varying phenotype or genotype] |
| 627 Menopaus        | NA | NA | NA | 937 | NA | NA | [Error: non-varying phenotype or genotype] |
| 752.2 Other speci   | NA | NA | NA | 927 | NA | NA | [Error: non-varying phenotype or genotype] |
| 753 Congenital      | NA | NA | NA | 927 | NA | NA | [Error: non-varying phenotype or genotype] |
| 283.1 Autoimmur     | NA | NA | NA | 889 | NA | NA | [Error: non-varying phenotype or genotype] |
| 174.11 Malignant r  | NA | NA | NA | 935 | NA | NA | [Error: non-varying phenotype or genotype] |
| 575.9 Nonspecific   | NA | NA | NA | 891 | NA | NA | [Error: non-varying phenotype or genotype] |
| 312.3 Impulse cor   | NA | NA | NA | 923 | NA | NA | [Error: non-varying phenotype or genotype] |
| 736.5 Acquired d    | NA | NA | NA | 854 | NA | NA | [Error: non-varying phenotype or genotype] |
| 182 Malignant r     | NA | NA | NA | 937 | NA | NA | [Error: non-varying phenotype or genotype] |
| 202.21 Nodular lyn  | NA | NA | NA | 927 | NA | NA | [Error: non-varying phenotype or genotype] |
| 343 Infantile ce    | NA | NA | NA | 823 | NA | NA | [Error: non-varying phenotype or genotype] |
| 531.5 Gastrojejun   | NA | NA | NA | 912 | NA | NA | [Error: non-varying phenotype or genotype] |
| 624 Symptoms i      | NA | NA | NA | 936 | NA | NA | [Error: non-varying phenotype or genotype] |
| 724.2 Disorders o   | NA | NA | NA | 738 | NA | NA | [Error: non-varying phenotype or genotype] |
| 750.15 Congenital   | NA | NA | NA | 912 | NA | NA | [Error: non-varying phenotype or genotype] |

|                        |    |    |    |        |    |                                            |
|------------------------|----|----|----|--------|----|--------------------------------------------|
| 253.5 Pituitary dv NA  | NA | NA | NA | 819 NA | NA | [Error: non-varying phenotype or genotype] |
| 751.1 Congenital NA    | NA | NA | NA | 912 NA | NA | [Error: non-varying phenotype or genotype] |
| 519.2 Respiratory NA   | NA | NA | NA | 891 NA | NA | [Error: non-varying phenotype or genotype] |
| 619.5 Noninflamr NA    | NA | NA | NA | 937 NA | NA | [Error: non-varying phenotype or genotype] |
| 174 Breast canc NA     | NA | NA | NA | 935 NA | NA | [Error: non-varying phenotype or genotype] |
| 626 Disorders o NA     | NA | NA | NA | 937 NA | NA | [Error: non-varying phenotype or genotype] |
| 636 Early or thr NA    | NA | NA | NA | 936 NA | NA | [Error: non-varying phenotype or genotype] |
| 669 Complicatic NA     | NA | NA | NA | 937 NA | NA | [Error: non-varying phenotype or genotype] |
| 753.1 Congenital NA    | NA | NA | NA | 927 NA | NA | [Error: non-varying phenotype or genotype] |
| 625 Pain and ot NA     | NA | NA | NA | 936 NA | NA | [Error: non-varying phenotype or genotype] |
| 204.11 Lymphoid l NA   | NA | NA | NA | 927 NA | NA | [Error: non-varying phenotype or genotype] |
| 716.2 Unspecifec NA    | NA | NA | NA | 832 NA | NA | [Error: non-varying phenotype or genotype] |
| 614.5 Inflammatic NA   | NA | NA | NA | 937 NA | NA | [Error: non-varying phenotype or genotype] |
| 271 Disorders o NA     | NA | NA | NA | 935 NA | NA | [Error: non-varying phenotype or genotype] |
| 244.5 Congenital NA    | NA | NA | NA | 830 NA | NA | [Error: non-varying phenotype or genotype] |
| 626.12 Excessive o NA  | NA | NA | NA | 937 NA | NA | [Error: non-varying phenotype or genotype] |
| 480.2 Viral pneun NA   | NA | NA | NA | 789 NA | NA | [Error: non-varying phenotype or genotype] |
| 704.2 Hirsutism NA     | NA | NA | NA | 877 NA | NA | [Error: non-varying phenotype or genotype] |
| 973 Poisoning b NA     | NA | NA | NA | 839 NA | NA | [Error: non-varying phenotype or genotype] |
| 619.4 Noninflamr NA    | NA | NA | NA | 937 NA | NA | [Error: non-varying phenotype or genotype] |
| 528.11 Stomatitis ε NA | NA | NA | NA | 897 NA | NA | [Error: non-varying phenotype or genotype] |
| 767 Cervicocrar NA     | NA | NA | NA | 832 NA | NA | [Error: non-varying phenotype or genotype] |
| 90.3 Venereal di NA    | NA | NA | NA | 935 NA | NA | [Error: non-varying phenotype or genotype] |
| 656.7 Conditions NA    | NA | NA | NA | 936 NA | NA | [Error: non-varying phenotype or genotype] |
| 446.4 Wegener's NA     | NA | NA | NA | 745 NA | NA | [Error: non-varying phenotype or genotype] |
| 333.3 Tics and ch NA   | NA | NA | NA | 823 NA | NA | [Error: non-varying phenotype or genotype] |
| 529.1 Glossitis NA     | NA | NA | NA | 897 NA | NA | [Error: non-varying phenotype or genotype] |
| 31 Diseases du NA      | NA | NA | NA | 913 NA | NA | [Error: non-varying phenotype or genotype] |
| 374.2 Lagophthal NA    | NA | NA | NA | 782 NA | NA | [Error: non-varying phenotype or genotype] |
| 942 Infusion an NA     | NA | NA | NA | 790 NA | NA | [Error: non-varying phenotype or genotype] |
| 654.2 Rhesus isoi NA   | NA | NA | NA | 937 NA | NA | [Error: non-varying phenotype or genotype] |
| 571.6 Primary bili NA  | NA | NA | NA | 790 NA | NA | [Error: non-varying phenotype or genotype] |
| 733.4 Aseptic nec NA   | NA | NA | NA | 830 NA | NA | [Error: non-varying phenotype or genotype] |

|                        |    |    |    |        |    |                                            |
|------------------------|----|----|----|--------|----|--------------------------------------------|
| 530.7 Gastroesop NA    | NA | NA | NA | 673 NA | NA | [Error: non-varying phenotype or genotype] |
| 656.3 Endocrine ε NA   | NA | NA | NA | 936 NA | NA | [Error: non-varying phenotype or genotype] |
| 676 Other disor NA     | NA | NA | NA | 937 NA | NA | [Error: non-varying phenotype or genotype] |
| 755.3 Congenital NA    | NA | NA | NA | 923 NA | NA | [Error: non-varying phenotype or genotype] |
| 270.2 Disorders o NA   | NA | NA | NA | 911 NA | NA | [Error: non-varying phenotype or genotype] |
| 755.61 Congenital NA   | NA | NA | NA | 923 NA | NA | [Error: non-varying phenotype or genotype] |
| 286.11 Von willebr NA  | NA | NA | NA | 701 NA | NA | [Error: non-varying phenotype or genotype] |
| 112.3 Candidiasis NA   | NA | NA | NA | 831 NA | NA | [Error: non-varying phenotype or genotype] |
| 441.1 Acute vascul NA  | NA | NA | NA | 745 NA | NA | [Error: non-varying phenotype or genotype] |
| 255.13 Medulloadr NA   | NA | NA | NA | 819 NA | NA | [Error: non-varying phenotype or genotype] |
| 250.21 Type 2 diab NA  | NA | NA | NA | 665 NA | NA | [Error: non-varying phenotype or genotype] |
| 260.21 Kwashiorko NA   | NA | NA | NA | 847 NA | NA | [Error: non-varying phenotype or genotype] |
| 300.13 Phobia NA       | NA | NA | NA | 711 NA | NA | [Error: non-varying phenotype or genotype] |
| 569.1 Toxic gastrc NA  | NA | NA | NA | 838 NA | NA | [Error: non-varying phenotype or genotype] |
| 636.3 Hemorrhag NA     | NA | NA | NA | 936 NA | NA | [Error: non-varying phenotype or genotype] |
| 619.3 Noninflamr NA    | NA | NA | NA | 937 NA | NA | [Error: non-varying phenotype or genotype] |
| 646 Other comf NA      | NA | NA | NA | 937 NA | NA | [Error: non-varying phenotype or genotype] |
| 528.7 Sialolithiasi NA | NA | NA | NA | 897 NA | NA | [Error: non-varying phenotype or genotype] |
| 270.12 Phenylketo NA   | NA | NA | NA | 911 NA | NA | [Error: non-varying phenotype or genotype] |
| 755.4 Congenital NA    | NA | NA | NA | 923 NA | NA | [Error: non-varying phenotype or genotype] |
| 520 Disorders o NA     | NA | NA | NA | 896 NA | NA | [Error: non-varying phenotype or genotype] |
| 975 Poisoning b NA     | NA | NA | NA | 839 NA | NA | [Error: non-varying phenotype or genotype] |
| 315.2 Speech and NA    | NA | NA | NA | 923 NA | NA | [Error: non-varying phenotype or genotype] |
| 145.5 Cancer of tl NA  | NA | NA | NA | 922 NA | NA | [Error: non-varying phenotype or genotype] |
| 202 Cancer of o NA     | NA | NA | NA | 927 NA | NA | [Error: non-varying phenotype or genotype] |
| 386.3 Labyrinthiti NA  | NA | NA | NA | 772 NA | NA | [Error: non-varying phenotype or genotype] |
| 452.8 Postphlebit NA   | NA | NA | NA | 707 NA | NA | [Error: non-varying phenotype or genotype] |
| 610.1 Cystic mast NA   | NA | NA | NA | 920 NA | NA | [Error: non-varying phenotype or genotype] |
| 204.1 Lymphoid l NA    | NA | NA | NA | 927 NA | NA | [Error: non-varying phenotype or genotype] |
| 635 Hemorrhag NA       | NA | NA | NA | 936 NA | NA | [Error: non-varying phenotype or genotype] |
| 749 Congenital NA      | NA | NA | NA | 935 NA | NA | [Error: non-varying phenotype or genotype] |
| 612.1 Galactorrhε NA   | NA | NA | NA | 920 NA | NA | [Error: non-varying phenotype or genotype] |
| 642.1 Preeclamps NA    | NA | NA | NA | 937 NA | NA | [Error: non-varying phenotype or genotype] |



|        |                |    |    |    |     |    |                                            |
|--------|----------------|----|----|----|-----|----|--------------------------------------------|
| 706.3  | Seborrhea      | NA | NA | NA | 839 | NA | [Error: non-varying phenotype or genotype] |
| 280.2  | Iron deficie   | NA | NA | NA | 889 | NA | [Error: non-varying phenotype or genotype] |
| 609.1  | Infertility, n | NA | NA | NA | 635 | NA | [Error: non-varying phenotype or genotype] |
| 952    | Spinal cord    | NA | NA | NA | 937 | NA | [Error: non-varying phenotype or genotype] |
| 81.12  | Chronic gra    | NA | NA | NA | 924 | NA | [Error: non-varying phenotype or genotype] |
| 513.31 | Apnea          | NA | NA | NA | 905 | NA | [Error: non-varying phenotype or genotype] |
| 527.8  | Other speci    | NA | NA | NA | 897 | NA | [Error: non-varying phenotype or genotype] |
| 731.1  | Osteitis def   | NA | NA | NA | 830 | NA | [Error: non-varying phenotype or genotype] |
| 635.2  | Antepartun     | NA | NA | NA | 936 | NA | [Error: non-varying phenotype or genotype] |
| 271.3  | Intestinal d   | NA | NA | NA | 935 | NA | [Error: non-varying phenotype or genotype] |
| 686.5  | Pyoderma       | NA | NA | NA | 822 | NA | [Error: non-varying phenotype or genotype] |
| 609.11 | Azoosperm      | NA | NA | NA | 635 | NA | [Error: non-varying phenotype or genotype] |
| 752.11 | Spina bifida   | NA | NA | NA | 927 | NA | [Error: non-varying phenotype or genotype] |
| 741.1  | Ankylosis o    | NA | NA | NA | 823 | NA | [Error: non-varying phenotype or genotype] |
| 117.2  | Coccidioido    | NA | NA | NA | 831 | NA | [Error: non-varying phenotype or genotype] |
| 250.11 | Type 1 diab    | NA | NA | NA | 665 | NA | [Error: non-varying phenotype or genotype] |
| 149.3  | Cancer of h    | NA | NA | NA | 922 | NA | [Error: non-varying phenotype or genotype] |
| 695.81 | Erythema n     | NA | NA | NA | 797 | NA | [Error: non-varying phenotype or genotype] |
| 334.2  | Anterior ho    | NA | NA | NA | 823 | NA | [Error: non-varying phenotype or genotype] |
| 287.2  | Allergic pur   | NA | NA | NA | 701 | NA | [Error: non-varying phenotype or genotype] |
| 174.1  | Breast canc    | NA | NA | NA | 935 | NA | [Error: non-varying phenotype or genotype] |
| 537.1  | Lesions of s   | NA | NA | NA | 874 | NA | [Error: non-varying phenotype or genotype] |
| 643.1  | Hyperemes      | NA | NA | NA | 937 | NA | [Error: non-varying phenotype or genotype] |
| 500.2  | Pneumocor      | NA | NA | NA | 765 | NA | [Error: non-varying phenotype or genotype] |
| 204.21 | Myeloid leu    | NA | NA | NA | 927 | NA | [Error: non-varying phenotype or genotype] |
| 202.24 | Large cell ly  | NA | NA | NA | 927 | NA | [Error: non-varying phenotype or genotype] |
| 8.51   | Intestinal e   | NA | NA | NA | 929 | NA | [Error: non-varying phenotype or genotype] |
| 480.12 | Pseudomor      | NA | NA | NA | 789 | NA | [Error: non-varying phenotype or genotype] |
| 636.2  | Early onset    | NA | NA | NA | 936 | NA | [Error: non-varying phenotype or genotype] |
| 38.2   | Gram positi    | NA | NA | NA | 913 | NA | [Error: non-varying phenotype or genotype] |
| 159.3  | Malignant r    | NA | NA | NA | 890 | NA | [Error: non-varying phenotype or genotype] |
| 202.22 | Reticulosar    | NA | NA | NA | 927 | NA | [Error: non-varying phenotype or genotype] |
| 446.7  | Takayasu's     | NA | NA | NA | 745 | NA | [Error: non-varying phenotype or genotype] |

448 Disease of rNA

NA

NA

NA

745 NA

NA

[Error: non-varying phenotype or genotype]

**Supplemental Table E4**

| phecode | description   | lower    | upper    | OR       | p        | n_total | n_cases | n_controls | note |
|---------|---------------|----------|----------|----------|----------|---------|---------|------------|------|
| 415     | Pulmonary     | 1.668354 | 2.645977 | 2.09343  | 3.21E-10 | 993     | 90      | 903        |      |
| 415.2   | Chronic pul   | 1.648521 | 2.665195 | 2.087752 | 1.80E-09 | 982     | 79      | 903        |      |
| 627.2   | Symptomat     | 0.37937  | 0.614651 | 0.486179 | 4.58E-09 | 859     | 196     | 663        |      |
| 627     | Menopausa     | 0.43392  | 0.658347 | 0.537176 | 5.04E-09 | 932     | 269     | 663        |      |
| 415.21  | Primary pul   | 1.631216 | 3.082409 | 2.223024 | 7.74E-07 | 937     | 34      | 903        |      |
| 278.1   | Obesity       | 1.321642 | 1.944324 | 1.598217 | 1.89E-06 | 977     | 146     | 831        |      |
| 278     | Overweight    | 1.281752 | 1.814705 | 1.521106 | 2.20E-06 | 1031    | 200     | 831        |      |
| 428.1   | Congestive    | 1.310367 | 1.935647 | 1.587917 | 3.13E-06 | 907     | 130     | 777        |      |
| 496     | Chronic air   | 1.312639 | 1.96786  | 1.602981 | 4.35E-06 | 951     | 97      | 854        |      |
| 509     | Respiratory   | 1.466768 | 2.611963 | 1.936734 | 6.20E-06 | 972     | 37      | 935        |      |
| 278.11  | Morbid obe    | 1.349526 | 2.270363 | 1.736597 | 3.07E-05 | 895     | 64      | 831        |      |
| 428     | Congestive    | 1.213059 | 1.747449 | 1.4535   | 5.46E-05 | 939     | 162     | 777        |      |
| 509.1   | Respiratory   | 1.380188 | 2.562758 | 1.861869 | 5.96E-05 | 962     | 27      | 935        |      |
| 416     | Cardiomega    | 1.272268 | 2.027732 | 1.605636 | 6.08E-05 | 986     | 83      | 903        |      |
| 198.6   | Secondary i   | 1.414907 | 3.149048 | 2.084818 | 0.000168 | 977     | 11      | 966        |      |
| 508     | Pulmonary     | 1.184359 | 1.808089 | 1.467252 | 0.000329 | 1027    | 92      | 935        |      |
| 197     | Chemother     | 1.278129 | 2.478402 | 1.78897  | 0.000361 | 987     | 21      | 966        |      |
| 726     | Peripheral c  | 0.575034 | 0.854831 | 0.704845 | 0.000545 | 917     | 225     | 692        |      |
| 512.7   | Shortness c   | 1.143139 | 1.610795 | 1.352129 | 0.000558 | 777     | 364     | 413        |      |
| 198     | Secondary i   | 1.237855 | 2.315289 | 1.704654 | 0.000574 | 992     | 26      | 966        |      |
| 276.6   | Fluid overlc  | 1.312346 | 3.017012 | 1.997639 | 0.0006   | 868     | 10      | 858        |      |
| 627.21  | Symptomat     | 0.141264 | 0.57885  | 0.298763 | 0.00078  | 688     | 25      | 663        |      |
| 687.4   | Disturbanc    | 0.47145  | 0.820246 | 0.627614 | 0.000979 | 904     | 118     | 786        |      |
| 198.1   | Secondary i   | 1.229414 | 2.754428 | 1.874738 | 0.001286 | 977     | 11      | 966        |      |
| 513     | Respiratory   | 1.201384 | 2.373778 | 1.710594 | 0.001311 | 1080    | 19      | 1061       |      |
| 173     | Neoplasm c    | 0.472067 | 0.828871 | 0.631499 | 0.001379 | 977     | 112     | 865        |      |
| 745     | Pain in joint | 0.67118  | 0.907695 | 0.782728 | 0.001455 | 1018    | 475     | 543        |      |
| 512.9   | Other dyspi   | 1.127972 | 1.679649 | 1.372776 | 0.001777 | 624     | 211     | 413        |      |
| 585.1   | Acute renal   | 1.179755 | 2.386538 | 1.713372 | 0.001788 | 998     | 16      | 982        |      |
| 585     | Renal failur  | 1.141867 | 1.880226 | 1.47712  | 0.001807 | 1034    | 52      | 982        |      |
| 627.22  | Need for Hc   | 0.242498 | 0.712278 | 0.427622 | 0.002008 | 697     | 34      | 663        |      |

|                    |          |          |          |          |      |     |      |
|--------------------|----------|----------|----------|----------|------|-----|------|
| 743 Osteoporos     | 0.619716 | 0.896273 | 0.748043 | 0.002039 | 1026 | 306 | 720  |
| 595 Hydroneph      | 0.066825 | 0.52261  | 0.199913 | 0.002152 | 1063 | 14  | 1049 |
| 41 Bacterial in    | 1.144799 | 2.198256 | 1.623341 | 0.002753 | 1077 | 24  | 1053 |
| 611.3 Lump or ma   | 0.441868 | 0.834853 | 0.614934 | 0.002764 | 908  | 88  | 820  |
| 250 Diabetes m     | 1.097108 | 1.574791 | 1.313992 | 0.002889 | 974  | 165 | 809  |
| 340 Migraine       | 0.443464 | 0.836675 | 0.616956 | 0.002902 | 1054 | 87  | 967  |
| 994 Sepsis and     | 1.187673 | 2.96385  | 1.945143 | 0.003064 | 1101 | 11  | 1090 |
| 702 Degenerati     | 0.580124 | 0.890712 | 0.723296 | 0.003072 | 994  | 189 | 805  |
| 994.2 Sepsis       | 1.175078 | 2.985005 | 1.944674 | 0.003525 | 1100 | 10  | 1090 |
| 250.2 Type 2 diab  | 1.089611 | 1.567482 | 1.306685 | 0.003713 | 971  | 162 | 809  |
| 465 Acute uppe     | 0.594138 | 0.899989 | 0.735855 | 0.00381  | 897  | 192 | 705  |
| 286.2 Encounter f  | 1.092481 | 1.644728 | 1.346546 | 0.004089 | 1033 | 115 | 918  |
| 743.11 Osteoporos  | 0.536109 | 0.884397 | 0.693625 | 0.004152 | 868  | 148 | 720  |
| 470 Septal Devi    | 0.34215  | 0.803501 | 0.535783 | 0.004198 | 720  | 50  | 670  |
| 216 Benign neo     | 0.511013 | 0.875139 | 0.67529  | 0.004265 | 979  | 113 | 866  |
| 427.9 Palpitations | 0.651324 | 0.922156 | 0.777512 | 0.004498 | 801  | 384 | 417  |
| 761 Cervicalgia    | 0.573002 | 0.897934 | 0.722337 | 0.004563 | 1041 | 163 | 878  |
| 389.1 Sensorineu   | 0.452758 | 0.857492 | 0.630525 | 0.004649 | 996  | 87  | 909  |
| 854 Complicatic    | 1.108602 | 2.136038 | 1.575249 | 0.004958 | 1061 | 22  | 1039 |
| 743.9 Osteopenia   | 0.573085 | 0.901869 | 0.723348 | 0.005113 | 904  | 184 | 720  |
| 395 Heart valve    | 1.076656 | 1.535086 | 1.285824 | 0.005179 | 940  | 180 | 760  |
| 366.2 Senile catar | 0.530729 | 0.889618 | 0.692474 | 0.005306 | 1027 | 133 | 894  |
| 611 Abnormal f     | 0.592335 | 0.908488 | 0.738265 | 0.005442 | 1003 | 183 | 820  |
| 420 Carditis       | 1.097809 | 1.913794 | 1.469771 | 0.005443 | 1013 | 37  | 976  |
| 728.7 Fasciitis    | 0.276034 | 0.784643 | 0.47933  | 0.005877 | 726  | 34  | 692  |
| 288 Diseases of    | 1.096503 | 2.013955 | 1.512886 | 0.005967 | 994  | 27  | 967  |
| 574 Cholelithias   | 1.093493 | 1.983553 | 1.500851 | 0.0062   | 1076 | 32  | 1044 |
| 300.1 Anxiety disc | 0.554631 | 0.902614 | 0.712673 | 0.006402 | 838  | 156 | 682  |
| 496.1 Emphysem:    | 1.081651 | 2.064019 | 1.530113 | 0.007601 | 877  | 23  | 854  |
| 507 Pleurisy; pl   | 1.078821 | 1.836903 | 1.427164 | 0.007782 | 984  | 49  | 935  |
| 394 Rheumatic      | 1.099181 | 2.00994  | 1.493683 | 0.007919 | 808  | 48  | 760  |
| 610 Benign mar     | 0.427078 | 0.867393 | 0.618571 | 0.007971 | 888  | 68  | 820  |
| 465.2 Acute phan   | 0.435822 | 0.87034  | 0.626055 | 0.008055 | 775  | 70  | 705  |

|                     |          |          |          |          |      |     |      |
|---------------------|----------|----------|----------|----------|------|-----|------|
| 510 Other disea     | 1.067477 | 1.62906  | 1.326516 | 0.008119 | 1092 | 93  | 999  |
| 512 Other symp      | 1.058838 | 1.446349 | 1.233966 | 0.008173 | 1005 | 592 | 413  |
| 743.1 Osteoporos    | 0.583816 | 0.919542 | 0.737041 | 0.008454 | 897  | 177 | 720  |
| 727.1 Synovitis ar  | 0.411951 | 0.865623 | 0.607239 | 0.008516 | 752  | 60  | 692  |
| 300 Anxiety, ph     | 0.589795 | 0.923005 | 0.7423   | 0.009101 | 866  | 184 | 682  |
| 573.7 Abnormal r    | 0.376862 | 0.861321 | 0.580474 | 0.009995 | 976  | 54  | 922  |
| 495.1 Chronic obs   | 1.06866  | 2.52961  | 1.712389 | 0.01016  | 865  | 11  | 854  |
| 574.1 Cholelithias  | 1.065723 | 2.007566 | 1.497854 | 0.010285 | 1072 | 28  | 1044 |
| 562.1 Diverticulo   | 0.581001 | 0.927464 | 0.739715 | 0.011564 | 923  | 149 | 774  |
| 476 Allergic rhir   | 0.628586 | 0.939479 | 0.772674 | 0.011853 | 875  | 205 | 670  |
| 610.1 Cystic mast   | 0.396448 | 0.876491 | 0.601271 | 0.012132 | 874  | 54  | 820  |
| 420.2 Pericarditis  | 1.051693 | 2.028777 | 1.500066 | 0.012671 | 1000 | 24  | 976  |
| 415.11 Pulmonary    | 1.056021 | 3.033826 | 1.863144 | 0.012754 | 913  | 10  | 903  |
| 702.2 Seborrheic    | 0.586916 | 0.932686 | 0.745366 | 0.012919 | 1006 | 154 | 852  |
| 394.7 Disease of t  | 1.070762 | 2.308333 | 1.594009 | 0.013516 | 784  | 24  | 760  |
| 38 Septicemia       | 1.056433 | 2.83326  | 1.820365 | 0.014109 | 1064 | 11  | 1053 |
| 395.1 Nonrheum      | 1.044299 | 1.574636 | 1.286017 | 0.015271 | 871  | 111 | 760  |
| 571.8 Liver absce   | 1.041209 | 2.716135 | 1.759243 | 0.01545  | 932  | 10  | 922  |
| 594.3 Calculus of   | 0.142609 | 0.779117 | 0.352648 | 0.016413 | 1065 | 16  | 1049 |
| 253 Disorders o     | 1.030589 | 2.091978 | 1.515182 | 0.01701  | 971  | 17  | 954  |
| 571.51 Cirrhosis of | 1.040065 | 2.288348 | 1.58892  | 0.017114 | 939  | 17  | 922  |
| 366 Cataract        | 0.591917 | 0.944801 | 0.752679 | 0.017273 | 1053 | 159 | 894  |
| 288.2 Elevated wl   | 1.029227 | 2.242525 | 1.569395 | 0.017318 | 981  | 14  | 967  |
| 916 Contusion       | 1.039277 | 1.772062 | 1.376438 | 0.017554 | 1055 | 54  | 1001 |
| 276.5 Hypovolem     | 1.036965 | 1.844481 | 1.405497 | 0.017956 | 902  | 44  | 858  |
| 585.3 Chronic ren   | 1.034274 | 1.914024 | 1.435718 | 0.018247 | 1015 | 33  | 982  |
| 599.3 Dysuria       | 0.573964 | 0.942947 | 0.742027 | 0.01857  | 905  | 134 | 771  |
| 389 Hearing los     | 0.578374 | 0.945332 | 0.745428 | 0.019161 | 1043 | 134 | 909  |
| 627.3 Postmenop     | 0.373727 | 0.898763 | 0.592354 | 0.019381 | 706  | 43  | 663  |
| 261.4 Vitamin D c   | 0.620673 | 0.954119 | 0.775037 | 0.020264 | 1003 | 173 | 830  |
| 259 Other endo      | 0.214428 | 0.849327 | 0.447115 | 0.022181 | 976  | 22  | 954  |
| 418 Nonspecific     | 0.733137 | 0.976691 | 0.847197 | 0.023019 | 1011 | 600 | 411  |
| 331 Other cerek     | 1.003084 | 2.373539 | 1.615751 | 0.023538 | 916  | 15  | 901  |

|                      |          |          |          |          |      |     |      |
|----------------------|----------|----------|----------|----------|------|-----|------|
| 272.13 Mixed hype    | 0.651764 | 0.965143 | 0.79733  | 0.023699 | 689  | 299 | 390  |
| 428.3 Heart failur   | 1.02632  | 1.885913 | 1.407752 | 0.024893 | 822  | 45  | 777  |
| 938 Dermatitis       | 0.244307 | 0.875033 | 0.482726 | 0.025475 | 890  | 24  | 866  |
| 938.2 Chronic der    | 0.236565 | 0.876776 | 0.476359 | 0.026668 | 889  | 23  | 866  |
| 743.12 Senile osteo  | 0.449407 | 0.940404 | 0.660511 | 0.027667 | 781  | 61  | 720  |
| 386.9 Dizziness ar   | 0.64541  | 0.969723 | 0.796127 | 0.028247 | 985  | 190 | 795  |
| 727 Other disor      | 0.586475 | 0.961987 | 0.758014 | 0.028369 | 817  | 125 | 692  |
| 785 Abdominal        | 0.707289 | 0.978073 | 0.834944 | 0.029024 | 1026 | 318 | 708  |
| 593.2 Microscopic    | 0.229534 | 0.882167 | 0.471752 | 0.029309 | 772  | 22  | 750  |
| 707 Chronic ulc      | 0.985966 | 2.247814 | 1.558687 | 0.029678 | 1094 | 17  | 1077 |
| 415.1 Acute pulm     | 0.968982 | 2.681127 | 1.696804 | 0.029854 | 914  | 11  | 903  |
| 562 Diverticulosis   | 0.624313 | 0.97218  | 0.784735 | 0.032035 | 931  | 157 | 774  |
| 386.1 Meniere's c    | 0.123264 | 0.84377  | 0.3491   | 0.032304 | 807  | 12  | 795  |
| 327.32 Obstructive   | 1.010902 | 1.58404  | 1.272717 | 0.032956 | 894  | 74  | 820  |
| 261 Vitamin def      | 0.653489 | 0.976321 | 0.803763 | 0.033031 | 1027 | 197 | 830  |
| 195 Cancer, sus      | 0.98274  | 2.664968 | 1.695294 | 0.033891 | 980  | 14  | 966  |
| 367 Disorders o      | 0.518743 | 0.962489 | 0.715975 | 0.034465 | 1071 | 82  | 989  |
| 495.2 Asthma wit     | 0.979379 | 1.992165 | 1.446777 | 0.035064 | 875  | 21  | 854  |
| 367.1 Myopia         | 0.416922 | 0.949155 | 0.642613 | 0.035491 | 1038 | 49  | 989  |
| 912 Insect bite      | 0.138998 | 0.872022 | 0.372812 | 0.035677 | 1054 | 13  | 1041 |
| 208 Benign neo       | 0.640378 | 0.978677 | 0.796985 | 0.036111 | 1071 | 175 | 896  |
| 458.9 Hypotensio     | 0.987892 | 1.860674 | 1.391909 | 0.036296 | 1016 | 30  | 986  |
| 380.1 Otitis exteri  | 0.118918 | 0.877879 | 0.351615 | 0.040814 | 1017 | 11  | 1006 |
| 172.21 Basal cell ca | 0.185842 | 0.912733 | 0.436307 | 0.041637 | 881  | 16  | 865  |
| 351 Other perip      | 0.535243 | 0.976359 | 0.732679 | 0.042982 | 1003 | 84  | 919  |
| 798 Malaise anc      | 0.738218 | 0.99348  | 0.858466 | 0.043596 | 990  | 449 | 541  |
| 709 Diffuse dise     | 0.977033 | 1.84337  | 1.373928 | 0.044014 | 891  | 27  | 864  |
| 475 Chronic sinu     | 0.523542 | 0.987161 | 0.729461 | 0.051477 | 744  | 74  | 670  |
| 292.2 Mild cognit    | 0.167058 | 0.944102 | 0.42444  | 0.051962 | 957  | 13  | 944  |
| 280.1 Iron deficie   | 0.954014 | 1.906391 | 1.394292 | 0.052063 | 1001 | 22  | 979  |
| 327.3 Sleep apnea    | 0.990767 | 1.514477 | 1.230912 | 0.052335 | 911  | 91  | 820  |
| 726.1 Enthesopat     | 0.607423 | 0.995118 | 0.784777 | 0.054519 | 809  | 117 | 692  |
| 611.1 Abnormal r     | 0.629923 | 0.996543 | 0.798883 | 0.055228 | 962  | 142 | 820  |

|                      |          |          |          |          |      |     |     |
|----------------------|----------|----------|----------|----------|------|-----|-----|
| 292 Neurologic       | 0.572152 | 0.996934 | 0.762991 | 0.056536 | 1046 | 102 | 944 |
| 760 Back pain        | 0.722415 | 1.001839 | 0.853295 | 0.056999 | 1017 | 328 | 689 |
| 280 Iron defic       | 0.946493 | 1.895168 | 1.38624  | 0.057637 | 1002 | 23  | 979 |
| 414 Other form       | 0.971529 | 1.660968 | 1.289609 | 0.059147 | 743  | 54  | 689 |
| 428.4 Heart failur   | 0.972191 | 1.760414 | 1.324884 | 0.060039 | 828  | 51  | 777 |
| 947 Urticaria        | 0.240856 | 0.973904 | 0.5117   | 0.061292 | 885  | 19  | 866 |
| 509.2 Respiratory    | 0.891733 | 2.321523 | 1.530989 | 0.062612 | 945  | 10  | 935 |
| 765 Cervical rac     | 0.364232 | 1.000335 | 0.624565 | 0.069202 | 941  | 32  | 909 |
| 276.14 Hypopotas     | 0.964948 | 1.685803 | 1.290014 | 0.070039 | 918  | 60  | 858 |
| 244.4 Hypothyroi     | 0.983591 | 1.365219 | 1.16065  | 0.073354 | 964  | 234 | 730 |
| 381.1 Otitis medi    | 0.271619 | 1.013122 | 0.548414 | 0.074637 | 938  | 20  | 918 |
| 297 Suicidal ide     | 0.877639 | 2.864319 | 1.688728 | 0.07468  | 692  | 10  | 682 |
| 276 Disorders o      | 0.978643 | 1.415655 | 1.181536 | 0.074899 | 1023 | 165 | 858 |
| 272.11 Hyperchole    | 0.664387 | 1.012924 | 0.826099 | 0.075785 | 616  | 226 | 390 |
| 381 Otitis medi      | 0.536399 | 1.015522 | 0.7488   | 0.076355 | 991  | 73  | 918 |
| 442.11 Abdominal     | 0.866332 | 2.443356 | 1.568656 | 0.077273 | 925  | 11  | 914 |
| 411.1 Unstable ar    | 0.963378 | 1.605256 | 1.254046 | 0.078822 | 765  | 76  | 689 |
| 174 Breast canc      | 0.961986 | 1.552306 | 1.236383 | 0.079234 | 983  | 70  | 913 |
| 174.11 Malignant r   | 0.960357 | 1.565651 | 1.241726 | 0.07948  | 979  | 66  | 913 |
| 174.1 Breast canc    | 0.960357 | 1.565651 | 1.241726 | 0.07948  | 979  | 66  | 913 |
| 599 Other symp       | 0.715123 | 1.014579 | 0.855583 | 0.080421 | 1034 | 263 | 771 |
| 374.3 Ptosis of ey   | 0.24426  | 1.02405  | 0.52738  | 0.080757 | 896  | 18  | 878 |
| 389.4 Tinnitus       | 0.36741  | 1.021663 | 0.633526 | 0.081498 | 940  | 31  | 909 |
| 172.1 Melanomas      | 0.888896 | 2.082945 | 1.439767 | 0.081827 | 878  | 13  | 865 |
| 733 Other disor      | 0.251266 | 1.025401 | 0.535503 | 0.083657 | 918  | 18  | 900 |
| 506 Empyema a        | 0.847856 | 2.268913 | 1.502977 | 0.087444 | 945  | 10  | 935 |
| 626.1 Irregular m    | 0.553793 | 1.021957 | 0.76532  | 0.087805 | 737  | 74  | 663 |
| 292.3 Memory lo      | 0.476904 | 1.032106 | 0.714039 | 0.087818 | 997  | 53  | 944 |
| 244 Hypothyroi       | 0.976511 | 1.348612 | 1.149345 | 0.089388 | 973  | 243 | 730 |
| 447.7 Aortic ectas   | 0.88122  | 2.03189  | 1.414959 | 0.090246 | 928  | 14  | 914 |
| 427.2 Atrial fibrill | 0.972058 | 1.404741 | 1.170074 | 0.092419 | 606  | 189 | 417 |
| 452 Other veno       | 0.916154 | 1.805933 | 1.327947 | 0.09437  | 889  | 28  | 861 |
| 455 Hemorrhoid       | 0.512436 | 1.032929 | 0.740698 | 0.0944   | 924  | 63  | 861 |

|        |               |          |          |          |          |      |     |      |
|--------|---------------|----------|----------|----------|----------|------|-----|------|
| 783    | Fever of un   | 0.503291 | 1.035763 | 0.735074 | 0.095741 | 1066 | 59  | 1007 |
| 840.2  | Rotator cuff  | 0.20161  | 1.059449 | 0.494991 | 0.097997 | 911  | 14  | 897  |
| 379.2  | Disorders o   | 0.522725 | 1.039636 | 0.748287 | 0.098611 | 959  | 63  | 896  |
| 625    | Pain and ot   | 0.429338 | 1.041285 | 0.687583 | 0.098829 | 1016 | 39  | 977  |
| 433.1  | Occlusion a   | 0.55658  | 1.036962 | 0.769515 | 0.099231 | 961  | 81  | 880  |
| 614    | Inflammatc    | 0.417346 | 1.043716 | 0.679249 | 0.099523 | 1059 | 37  | 1022 |
| 395.2  | Nonrheumc     | 0.942739 | 1.651889 | 1.260981 | 0.101772 | 821  | 61  | 760  |
| 371    | Inflammati    | 0.559585 | 1.044048 | 0.773927 | 0.107566 | 957  | 79  | 878  |
| 702.1  | Actinic kera  | 0.566778 | 1.043546 | 0.779164 | 0.109497 | 932  | 80  | 852  |
| 411.4  | Coronary ar   | 0.967169 | 1.349515 | 1.143805 | 0.112476 | 943  | 254 | 689  |
| 464    | Acute sinus   | 0.668569 | 1.034119 | 0.838252 | 0.113008 | 854  | 149 | 705  |
| 743.13 | Other speci   | 0.477927 | 1.053925 | 0.725843 | 0.113019 | 767  | 47  | 720  |
| 626.13 | Irregular m   | 0.42951  | 1.051644 | 0.695039 | 0.113908 | 699  | 36  | 663  |
| 411    | Ischemic Hc   | 0.969466 | 1.32234  | 1.132773 | 0.114256 | 1013 | 324 | 689  |
| 585.33 | Chronic Kid   | 0.876127 | 1.95885  | 1.372944 | 0.11504  | 1003 | 21  | 982  |
| 722    | Interverteb   | 0.664107 | 1.037496 | 0.836739 | 0.117696 | 938  | 141 | 797  |
| 694    | Dyschromic    | 0.46042  | 1.056926 | 0.716364 | 0.117721 | 929  | 42  | 887  |
| 428.2  | Heart failur  | 0.914438 | 1.759839 | 1.292446 | 0.119298 | 819  | 42  | 777  |
| 374    | Other disor   | 0.528133 | 1.057741 | 0.759008 | 0.120148 | 940  | 62  | 878  |
| 764    | Sciatica      | 0.313951 | 1.081012 | 0.611429 | 0.121451 | 930  | 21  | 909  |
| 593    | Hematuria     | 0.574606 | 1.049366 | 0.787785 | 0.121466 | 832  | 82  | 750  |
| 433.6  | Acute, but i  | 0.387644 | 1.077364 | 0.667511 | 0.122334 | 910  | 30  | 880  |
| 618.5  | Prolapse of   | 0.210857 | 1.116998 | 0.520132 | 0.125272 | 1056 | 13  | 1043 |
| 480    | Pneumonia     | 0.9331   | 1.580862 | 1.2273   | 0.125573 | 907  | 70  | 837  |
| 427.3  | Other speci   | 0.630768 | 1.046843 | 0.820609 | 0.125772 | 534  | 117 | 417  |
| 626    | Disorders o   | 0.597697 | 1.048141 | 0.803516 | 0.12746  | 747  | 84  | 663  |
| 723    | Other disor   | 0.231969 | 1.108388 | 0.543323 | 0.128324 | 811  | 14  | 797  |
| 318    | Tobacco us    | 0.941175 | 1.460977 | 1.182481 | 0.131225 | 1069 | 90  | 979  |
| 496.2  | Chronic brc   | 0.890949 | 1.758382 | 1.293527 | 0.13261  | 887  | 33  | 854  |
| 714.1  | Rheumatoi     | 0.890605 | 1.806197 | 1.308696 | 0.1337   | 956  | 31  | 925  |
| 840    | Sprains and   | 0.613617 | 1.052504 | 0.813342 | 0.134222 | 994  | 97  | 897  |
| 427.22 | Atrial flutte | 0.923408 | 1.574706 | 1.221825 | 0.135474 | 470  | 53  | 417  |
| 401.21 | Hypertensin   | 0.538531 | 1.066798 | 0.770687 | 0.136409 | 406  | 88  | 318  |



|        |              |          |          |          |          |      |     |      |
|--------|--------------|----------|----------|----------|----------|------|-----|------|
| 747.12 | Valvular he  | 0.826183 | 2.094929 | 1.395148 | 0.136734 | 1039 | 10  | 1029 |
| 792    | Abnormal F   | 0.490975 | 1.069922 | 0.743027 | 0.136972 | 959  | 50  | 909  |
| 296.1  | Bipolar      | 0.859078 | 2.022831 | 1.364944 | 0.140123 | 701  | 19  | 682  |
| 316    | Substance a  | 0.824721 | 1.985162 | 1.369042 | 0.140166 | 991  | 12  | 979  |
| 716.9  | Arthropath   | 0.915503 | 1.60095  | 1.232269 | 0.140619 | 970  | 56  | 914  |
| 375.1  | Dry eyes     | 0.580456 | 1.064991 | 0.796201 | 0.141759 | 974  | 78  | 896  |
| 704.1  | Alopecia     | 0.415373 | 1.089187 | 0.695454 | 0.142347 | 1033 | 32  | 1001 |
| 317    | Alcohol-rela | 0.790164 | 2.217912 | 1.44766  | 0.142618 | 989  | 10  | 979  |
| 792.1  | Papanicola   | 0.4577   | 1.079681 | 0.724873 | 0.144249 | 950  | 41  | 909  |
| 411.8  | Other chroi  | 0.920254 | 1.582215 | 1.221033 | 0.144936 | 754  | 65  | 689  |
| 250.41 | Impaired fa  | 0.411143 | 1.09608  | 0.693267 | 0.145571 | 843  | 34  | 809  |
| 379    | Other disor  | 0.563613 | 1.071389 | 0.787831 | 0.146165 | 966  | 70  | 896  |
| 694.2  | Other dyscl  | 0.463161 | 1.084217 | 0.729135 | 0.148054 | 926  | 39  | 887  |
| 352.1  | Trigeminal   | 0.165252 | 1.169787 | 0.484408 | 0.148739 | 929  | 10  | 919  |
| 850    | Hemorrhag    | 0.165723 | 1.187624 | 0.484626 | 0.149329 | 1049 | 10  | 1039 |
| 327    | Sleep disor  | 0.684731 | 1.050121 | 0.85461  | 0.150171 | 979  | 159 | 820  |
| 211    | Benign neo   | 0.300683 | 1.127675 | 0.614424 | 0.15145  | 1082 | 19  | 1063 |
| 381.2  | Eustachian   | 0.508244 | 1.08325  | 0.75769  | 0.152266 | 968  | 50  | 918  |
| 458    | Hypotensio   | 0.913065 | 1.543439 | 1.206703 | 0.156442 | 1045 | 59  | 986  |
| 722.6  | Degenerati   | 0.65281  | 1.059373 | 0.839456 | 0.15715  | 914  | 117 | 797  |
| 285    | Other anen   | 0.9048   | 1.583708 | 1.220837 | 0.157562 | 1029 | 50  | 979  |
| 578.2  | Blood in stc | 0.890987 | 1.64293  | 1.241374 | 0.160991 | 943  | 39  | 904  |
| 611.11 | Mammogra     | 0.403058 | 1.11529  | 0.694321 | 0.162179 | 849  | 29  | 820  |
| 374.6  | Dermatoch    | 0.483868 | 1.101756 | 0.745804 | 0.16299  | 922  | 44  | 878  |
| 539    | Bariatric su | 0.846502 | 1.816146 | 1.300535 | 0.165151 | 1099 | 20  | 1079 |
| 327.4  | Insomnia     | 0.609887 | 1.072157 | 0.81864  | 0.165401 | 913  | 93  | 820  |
| 564.1  | Irritable Bo | 0.516178 | 1.090131 | 0.76687  | 0.165558 | 825  | 51  | 774  |
| 715.1  | Sacroiliitis | 0.242497 | 1.167067 | 0.572025 | 0.167364 | 939  | 14  | 925  |
| 737    | Curvature c  | 0.277478 | 1.163431 | 0.602893 | 0.168891 | 947  | 17  | 930  |
| 627.1  | Postmenop    | 0.450063 | 1.109753 | 0.728191 | 0.170844 | 696  | 33  | 663  |
| 714    | Rheumatoi    | 0.891313 | 1.640168 | 1.235891 | 0.171857 | 971  | 46  | 925  |
| 613.5  | Mastodynai   | 0.406846 | 1.120356 | 0.700839 | 0.172267 | 999  | 29  | 970  |
| 443.9  | Peripheral   | 0.880836 | 1.68515  | 1.250668 | 0.173849 | 953  | 39  | 914  |

|                            |          |          |          |          |      |     |      |
|----------------------------|----------|----------|----------|----------|------|-----|------|
| 371.3 Inflammation         | 0.416879 | 1.135249 | 0.709052 | 0.179294 | 909  | 31  | 878  |
| 599.5 Frequency of         | 0.635649 | 1.073944 | 0.835674 | 0.180468 | 874  | 103 | 771  |
| 386 Vertiginous            | 0.508709 | 1.100781 | 0.767154 | 0.180604 | 841  | 46  | 795  |
| 626.11 Absent or irregular | 0.274892 | 1.154028 | 0.608976 | 0.181311 | 679  | 16  | 663  |
| 790.6 Other abnormal       | 0.550666 | 1.093534 | 0.790991 | 0.18232  | 1011 | 60  | 951  |
| 189 Cancer of uterus       | 0.197815 | 1.229766 | 0.535891 | 0.184042 | 1100 | 11  | 1089 |
| 704 Diseases of            | 0.475594 | 1.114762 | 0.748721 | 0.185814 | 1040 | 39  | 1001 |
| 371.2 Conjunctivitis       | 0.493631 | 1.116444 | 0.758859 | 0.18602  | 922  | 44  | 878  |
| 368 Visual disturbance     | 0.537392 | 1.100502 | 0.784572 | 0.186391 | 1057 | 55  | 1002 |
| 681.1 Cellulitis and       | 0.279219 | 1.19194  | 0.612119 | 0.187505 | 959  | 16  | 943  |
| 272.1 Hyperlipidemia       | 0.778936 | 1.049872 | 0.905009 | 0.188436 | 1043 | 653 | 390  |
| 362.4 Retinal vascular     | 0.787993 | 2.075159 | 1.375363 | 0.188933 | 965  | 13  | 952  |
| 721.1 Spondylosis          | 0.671059 | 1.07034  | 0.855553 | 0.190752 | 919  | 122 | 797  |
| 771.2 Cramp of limb        | 0.216901 | 1.232387 | 0.560662 | 0.194581 | 984  | 12  | 972  |
| 798.1 Chronic fatigue      | 0.278507 | 1.197561 | 0.616249 | 0.195112 | 556  | 15  | 541  |
| 427 Cardiac dysfunction    | 0.787677 | 1.049573 | 0.909804 | 0.195172 | 1005 | 588 | 417  |
| 628 Ovarian cysts          | 0.387661 | 1.14465  | 0.697753 | 0.195794 | 687  | 24  | 663  |
| 571.5 Other chronic        | 0.898691 | 1.538463 | 1.190805 | 0.197747 | 983  | 61  | 922  |
| 599.9 Other abnormal       | 0.520193 | 1.110406 | 0.778662 | 0.197835 | 819  | 48  | 771  |
| 571 Chronic liver          | 0.901773 | 1.520871 | 1.184789 | 0.198785 | 988  | 66  | 922  |
| 695.3 Rosacea              | 0.36872  | 1.158503 | 0.684894 | 0.198976 | 909  | 22  | 887  |
| 440.9 Atherosclerosis      | 0.829685 | 1.883072 | 1.304414 | 0.200691 | 939  | 25  | 914  |
| 701.2 Scar condition       | 0.357729 | 1.171543 | 0.677454 | 0.200866 | 975  | 22  | 953  |
| 577 Diseases of            | 0.184156 | 1.25873  | 0.532794 | 0.203077 | 1101 | 10  | 1091 |
| 272 Disorders of           | 0.782748 | 1.053326 | 0.908633 | 0.204303 | 1047 | 657 | 390  |
| 735 Acquired for           | 0.601687 | 1.095821 | 0.823456 | 0.205175 | 1007 | 77  | 930  |
| 426.24 Atrioventricular    | 0.85305  | 1.775274 | 1.260987 | 0.205237 | 445  | 28  | 417  |
| 352 Disorders of           | 0.318903 | 1.193182 | 0.652654 | 0.208215 | 937  | 18  | 919  |
| 381.11 Suppurative         | 0.27276  | 1.239758 | 0.619162 | 0.217296 | 932  | 14  | 918  |
| 690.1 Seborrheic           | 0.210824 | 1.254533 | 0.56787  | 0.217509 | 897  | 10  | 887  |
| 721 Spondylosis            | 0.688976 | 1.077454 | 0.869233 | 0.219638 | 929  | 132 | 797  |
| 737.3 Kyphoscoliosis       | 0.279003 | 1.23031  | 0.626065 | 0.219717 | 945  | 15  | 930  |
| 514 Abnormal function      | 0.856898 | 1.653194 | 1.22651  | 0.219908 | 1067 | 36  | 1031 |

|                       |          |          |          |          |      |     |      |
|-----------------------|----------|----------|----------|----------|------|-----|------|
| 371.21 Allergic con   | 0.485885 | 1.144504 | 0.764303 | 0.220007 | 917  | 39  | 878  |
| 614.5 Inflammatic     | 0.440841 | 1.155719 | 0.739264 | 0.222032 | 1053 | 31  | 1022 |
| 79 Viral infecti      | 0.373849 | 1.166833 | 0.697693 | 0.222105 | 933  | 22  | 911  |
| 738 Other acqu        | 0.409451 | 1.169933 | 0.719877 | 0.222945 | 957  | 27  | 930  |
| 613 Other nonn        | 0.604996 | 1.102723 | 0.829615 | 0.224175 | 1045 | 75  | 970  |
| 771.1 Swelling of     | 0.877882 | 1.559106 | 1.193403 | 0.225207 | 1025 | 53  | 972  |
| 242 Thyrotoxicc       | 0.84578  | 1.684882 | 1.233428 | 0.22565  | 762  | 32  | 730  |
| 78 Viral warts        | 0.41787  | 1.166282 | 0.726153 | 0.225767 | 938  | 27  | 911  |
| 300.9 Posttrauma      | 0.719248 | 2.397298 | 1.430388 | 0.226955 | 692  | 10  | 682  |
| 427.8 Sinoatrial n    | 0.894508 | 1.503635 | 1.171577 | 0.228354 | 496  | 79  | 417  |
| 286.8 Hypercoagu      | 0.718053 | 2.433144 | 1.44483  | 0.231912 | 929  | 11  | 918  |
| 690 Erythematc        | 0.237433 | 1.265484 | 0.599176 | 0.23411  | 898  | 11  | 887  |
| 772.2 Spasm of m      | 0.487726 | 1.145944 | 0.770329 | 0.234559 | 984  | 38  | 946  |
| 701 Other hype        | 0.605627 | 1.10942  | 0.832415 | 0.236417 | 1026 | 73  | 953  |
| 592 Cystitis and      | 0.32193  | 1.222777 | 0.667995 | 0.23856  | 766  | 16  | 750  |
| 394.2 Mitral valve    | 0.735619 | 2.210011 | 1.377196 | 0.242263 | 772  | 12  | 760  |
| 447 Other disor       | 0.800302 | 1.80815  | 1.268709 | 0.244864 | 934  | 20  | 914  |
| 681.5 Cellulitis an   | 0.756653 | 2.05254  | 1.339308 | 0.245158 | 957  | 14  | 943  |
| 427.12 Paroxysmal     | 0.865219 | 1.579207 | 1.19238  | 0.245648 | 460  | 43  | 417  |
| 348.9 Other cond      | 0.824628 | 1.706429 | 1.23515  | 0.246471 | 927  | 26  | 901  |
| 401.22 Hypertensi     | 0.772144 | 1.943403 | 1.299399 | 0.247795 | 332  | 14  | 318  |
| 338.1 Acute pain      | 0.841923 | 1.628985 | 1.209767 | 0.250681 | 1034 | 33  | 1001 |
| 735.3 Hallux valg     | 0.422382 | 1.192376 | 0.737515 | 0.252919 | 956  | 26  | 930  |
| 296 Mood disor        | 0.926922 | 1.31125  | 1.105689 | 0.253375 | 879  | 197 | 682  |
| 592.1 Cystitis        | 0.313877 | 1.246029 | 0.667885 | 0.25354  | 765  | 15  | 750  |
| 790 Nonspecific       | 0.312529 | 1.24816  | 0.666094 | 0.255478 | 967  | 16  | 951  |
| 622.2 Mucous po       | 0.213851 | 1.32221  | 0.585815 | 0.255617 | 1069 | 10  | 1059 |
| 350.2 Abnormalit      | 0.499644 | 1.170356 | 0.782675 | 0.260244 | 1043 | 41  | 1002 |
| 475.9 Postnasal d     | 0.248377 | 1.295893 | 0.619384 | 0.260527 | 681  | 11  | 670  |
| 472 Chronic pha       | 0.555368 | 1.140497 | 0.813186 | 0.261027 | 720  | 50  | 670  |
| 433 Cerebrovas        | 0.724402 | 1.083887 | 0.891338 | 0.263306 | 1066 | 186 | 880  |
| 427.21 Atrial fibrill | 0.916696 | 1.357691 | 1.11726  | 0.265873 | 599  | 182 | 417  |
| 426.7 Abnormal e      | 0.600686 | 1.126834 | 0.836497 | 0.266207 | 483  | 66  | 417  |

|        |              |          |          |          |          |      |     |      |
|--------|--------------|----------|----------|----------|----------|------|-----|------|
| 427.61 | Supraventri  | 0.274473 | 1.274119 | 0.650491 | 0.273532 | 430  | 13  | 417  |
| 244.2  | Acquired hy  | 0.75514  | 1.970394 | 1.301485 | 0.275754 | 746  | 16  | 730  |
| 427.7  | Tachycardia  | 0.678358 | 1.105447 | 0.873766 | 0.278082 | 534  | 117 | 417  |
| 193    | Thyroid car  | 0.717367 | 2.086758 | 1.335264 | 0.279659 | 1069 | 12  | 1057 |
| 495    | Asthma       | 0.891178 | 1.402118 | 1.129886 | 0.288042 | 955  | 101 | 854  |
| 348.2  | Cerebral ed  | 0.695561 | 2.085036 | 1.331563 | 0.293698 | 912  | 11  | 901  |
| 426.2  | Atrioventric | 0.843441 | 1.609255 | 1.185691 | 0.295542 | 459  | 42  | 417  |
| 594.1  | Calculus of  | 0.521061 | 1.174605 | 0.804821 | 0.298224 | 1090 | 41  | 1049 |
| 251    | Other disor  | 0.692141 | 2.178935 | 1.349461 | 0.299631 | 965  | 11  | 954  |
| 532    | Dysphagia    | 0.872083 | 1.452061 | 1.142598 | 0.301729 | 760  | 69  | 691  |
| 433.2  | Occlusion o  | 0.583501 | 1.15334  | 0.835566 | 0.303251 | 939  | 59  | 880  |
| 70     | Viral hepati | 0.718828 | 1.917686 | 1.280103 | 0.304995 | 922  | 11  | 911  |
| 939    | Atopic/cont  | 0.627578 | 1.133665 | 0.856414 | 0.30542  | 942  | 76  | 866  |
| 871.2  | Open woun    | 0.230909 | 1.362038 | 0.622403 | 0.305496 | 1015 | 10  | 1005 |
| 626.12 | Excessive o  | 0.462151 | 1.197514 | 0.779112 | 0.308703 | 690  | 27  | 663  |
| 250.3  | Insulin pum  | 0.794022 | 1.69687  | 1.214109 | 0.309261 | 836  | 27  | 809  |
| 362.21 | Macular de   | 0.272061 | 1.394782 | 0.657096 | 0.310769 | 965  | 13  | 952  |
| 296.2  | Depression   | 0.913728 | 1.304099 | 1.095696 | 0.311108 | 867  | 185 | 682  |
| 279.7  | Other immu   | 0.524734 | 1.173688 | 0.810625 | 0.311128 | 1036 | 40  | 996  |
| 172.2  | Other non-r  | 0.62054  | 1.142362 | 0.85399  | 0.311576 | 938  | 73  | 865  |
| 380.4  | Impacted c   | 0.514412 | 1.195376 | 0.805074 | 0.315936 | 1044 | 38  | 1006 |
| 715    | Other inflar | 0.34726  | 1.282163 | 0.713189 | 0.317136 | 942  | 17  | 925  |
| 536.8  | Dyspepsia a  | 0.520294 | 1.186721 | 0.809907 | 0.319887 | 1016 | 40  | 976  |
| 440.1  | Atheroscler  | 0.316112 | 1.328133 | 0.693452 | 0.321463 | 929  | 15  | 914  |
| 578    | Gastrointes  | 0.862323 | 1.460849 | 1.141366 | 0.322938 | 968  | 64  | 904  |
| 454.11 | Varicose ve  | 0.721757 | 1.976732 | 1.285129 | 0.325725 | 876  | 15  | 861  |
| 706    | Diseases of  | 0.620575 | 1.149868 | 0.856864 | 0.326968 | 1016 | 69  | 947  |
| 569    | Other disor  | 0.626453 | 1.141956 | 0.860331 | 0.327682 | 1040 | 72  | 968  |
| 716    | Other arthr  | 0.851621 | 1.494968 | 1.148733 | 0.333051 | 974  | 60  | 914  |
| 512.1  | Wheezing     | 0.78692  | 1.744995 | 1.210878 | 0.334794 | 442  | 29  | 413  |
| 622    | Polyp of fer | 0.443031 | 1.241184 | 0.7747   | 0.3364   | 1085 | 26  | 1059 |
| 291.8  | Alteration c | 0.729057 | 1.888638 | 1.25859  | 0.339065 | 959  | 15  | 944  |
| 304    | Adjustment   | 0.568965 | 1.18063  | 0.837597 | 0.343013 | 735  | 53  | 682  |

|                    |          |          |          |          |      |     |      |
|--------------------|----------|----------|----------|----------|------|-----|------|
| 741 Symptoms       | 0.721025 | 1.109766 | 0.901286 | 0.345085 | 1014 | 146 | 868  |
| 395.3 Nonrheuma    | 0.676312 | 2.204508 | 1.323643 | 0.351533 | 772  | 12  | 760  |
| 514.2 Solitary pul | 0.44701  | 1.254618 | 0.78087  | 0.352851 | 1057 | 26  | 1031 |
| 726.4 Calcaneal sj | 0.477286 | 1.232817 | 0.797234 | 0.352933 | 720  | 28  | 692  |
| 110.11 Dermatoph   | 0.488704 | 1.23269  | 0.801956 | 0.353249 | 996  | 31  | 965  |
| 594 Urinary calc   | 0.542814 | 1.195737 | 0.828767 | 0.354547 | 1091 | 42  | 1049 |
| 618.2 Uterine/Utr  | 0.302891 | 1.391674 | 0.696646 | 0.355178 | 1056 | 13  | 1043 |
| 555 Inflammato     | 0.684922 | 1.985033 | 1.278664 | 0.355733 | 785  | 11  | 774  |
| 803.2 Fracture of  | 0.408271 | 1.291031 | 0.761326 | 0.356704 | 976  | 22  | 954  |
| 337 Disorders o    | 0.752897 | 1.758963 | 1.218002 | 0.357016 | 921  | 20  | 901  |
| 250.42 Other abno  | 0.823959 | 1.542839 | 1.157202 | 0.358382 | 855  | 46  | 809  |
| 401 Hypertensio    | 0.919953 | 1.268126 | 1.077707 | 0.358914 | 1052 | 734 | 318  |
| 519 Other disea    | 0.760292 | 1.793086 | 1.221071 | 0.359904 | 1064 | 23  | 1041 |
| 618.1 Prolapse of  | 0.520841 | 1.222557 | 0.818827 | 0.360172 | 1081 | 38  | 1043 |
| 401.1 Essential hy | 0.919466 | 1.267428 | 1.077126 | 0.362348 | 1048 | 730 | 318  |
| 228 Hemangion      | 0.332994 | 1.348738 | 0.719847 | 0.362958 | 1067 | 14  | 1053 |
| 401.2 Hypertensio  | 0.62985  | 1.16247  | 0.868525 | 0.36832  | 418  | 100 | 318  |
| 165 Cancer with    | 0.678933 | 2.01605  | 1.281624 | 0.368418 | 1100 | 12  | 1088 |
| 165.1 Cancer of b  | 0.678933 | 2.01605  | 1.281624 | 0.368418 | 1100 | 12  | 1088 |
| 396 Abnormal h     | 0.654034 | 1.152826 | 0.877945 | 0.368503 | 852  | 92  | 760  |
| 334 Degenerati     | 0.671092 | 1.994405 | 1.273648 | 0.377484 | 913  | 12  | 901  |
| 286 Coagulator     | 0.78908  | 1.626392 | 1.175354 | 0.378978 | 951  | 33  | 918  |
| 340.1 Migrain wit  | 0.426516 | 1.274661 | 0.780259 | 0.379745 | 989  | 22  | 967  |
| 228.1 Hemangion    | 0.324113 | 1.380425 | 0.72149  | 0.383085 | 1066 | 13  | 1053 |
| 561 Symptoms       | 0.416372 | 1.299789 | 0.775005 | 0.384359 | 795  | 21  | 774  |
| 389.2 Conductive   | 0.352236 | 1.339872 | 0.739864 | 0.385183 | 924  | 15  | 909  |
| 473.4 Voice distu  | 0.544462 | 1.21559  | 0.836661 | 0.385735 | 708  | 38  | 670  |
| 386.2 Peripheral c | 0.480658 | 1.252783 | 0.807837 | 0.387072 | 823  | 28  | 795  |
| 573.6 Nonspecific  | 0.483642 | 1.260155 | 0.808937 | 0.388333 | 952  | 30  | 922  |
| 290.11 Alzheimer's | 0.68649  | 2.248865 | 1.296684 | 0.394788 | 957  | 13  | 944  |
| 459.9 Circulatory  | 0.28293  | 1.43621  | 0.699781 | 0.394854 | 997  | 11  | 986  |
| 809 Fracture of    | 0.386124 | 1.328679 | 0.764526 | 0.400278 | 972  | 18  | 954  |
| 473 Diseases of    | 0.585148 | 1.200106 | 0.857044 | 0.401086 | 717  | 47  | 670  |

|                    |          |          |          |          |      |     |      |
|--------------------|----------|----------|----------|----------|------|-----|------|
| 597 Other disor    | 0.350911 | 1.403043 | 0.742836 | 0.403755 | 1039 | 16  | 1023 |
| 788 Syncope an     | 0.740651 | 1.11788  | 0.916129 | 0.40438  | 1067 | 165 | 902  |
| 573 Other disor    | 0.716861 | 1.876308 | 1.225716 | 0.405997 | 940  | 18  | 922  |
| 300.12 Agorophob   | 0.320813 | 1.413916 | 0.730864 | 0.411379 | 696  | 14  | 682  |
| 698 Pruritus an    | 0.437079 | 1.314738 | 0.792568 | 0.411793 | 1068 | 23  | 1045 |
| 335 Multiple scl   | 0.706015 | 1.775596 | 1.205491 | 0.412221 | 915  | 14  | 901  |
| 516.1 Hemoptysis   | 0.290549 | 1.452617 | 0.713403 | 0.417176 | 1098 | 11  | 1087 |
| 516 Abnormal s     | 0.290549 | 1.452617 | 0.713403 | 0.417176 | 1098 | 11  | 1087 |
| 610.4 Benign neo   | 0.335951 | 1.370026 | 0.744828 | 0.421943 | 833  | 13  | 820  |
| 742.9 Other dera   | 0.408359 | 1.32955  | 0.782662 | 0.42235  | 887  | 19  | 868  |
| 564 Functional     | 0.644532 | 1.172036 | 0.884651 | 0.422938 | 842  | 68  | 774  |
| 276.12 Hyposmola   | 0.466791 | 1.315212 | 0.80985  | 0.423169 | 885  | 27  | 858  |
| 565 Anal and re    | 0.521808 | 1.250053 | 0.83568  | 0.42446  | 1002 | 34  | 968  |
| 427.6 Premature    | 0.614185 | 1.196193 | 0.874168 | 0.429228 | 474  | 57  | 417  |
| 804 Fracture of    | 0.34621  | 1.393178 | 0.752175 | 0.430808 | 968  | 14  | 954  |
| 740.2 Osteoarthr   | 0.834408 | 1.442729 | 1.115848 | 0.431265 | 784  | 63  | 721  |
| 742 Derangeme      | 0.440822 | 1.310222 | 0.801475 | 0.431513 | 890  | 22  | 868  |
| 871 Open woun      | 0.78004  | 1.587669 | 1.151164 | 0.437057 | 1040 | 35  | 1005 |
| 368.2 Diplopia an  | 0.381213 | 1.371753 | 0.773398 | 0.438462 | 1018 | 16  | 1002 |
| 290.13 Senile dem  | 0.32553  | 1.502064 | 0.743442 | 0.445436 | 956  | 12  | 944  |
| 840.3 Joint/ligam  | 0.442819 | 1.305969 | 0.807769 | 0.445563 | 918  | 21  | 897  |
| 274 Gout and o     | 0.755664 | 1.664764 | 1.166213 | 0.446715 | 1092 | 29  | 1063 |
| 368.9 Subjective \ | 0.453789 | 1.326654 | 0.811806 | 0.450386 | 1025 | 23  | 1002 |
| 696.4 Psoriasis    | 0.318278 | 1.431408 | 0.744886 | 0.451615 | 859  | 12  | 847  |
| 246 Other disor    | 0.478182 | 1.297194 | 0.824427 | 0.455389 | 757  | 27  | 730  |
| 770 Myalgia an     | 0.745389 | 1.127898 | 0.924413 | 0.456628 | 1053 | 147 | 906  |
| 618 Genital pro    | 0.571912 | 1.242796 | 0.862721 | 0.457651 | 1087 | 44  | 1043 |
| 289.4 Lymphader    | 0.561648 | 1.242695 | 0.85935  | 0.457988 | 1009 | 42  | 967  |
| 372 Disorders o    | 0.643614 | 1.974624 | 1.234925 | 0.459144 | 889  | 11  | 878  |
| 401.3 Other hype   | 0.554609 | 1.252733 | 0.856844 | 0.460458 | 368  | 50  | 318  |
| 454 Varicose ve    | 0.731514 | 1.706103 | 1.172753 | 0.460789 | 885  | 24  | 861  |
| 706.2 Sebaceous    | 0.587213 | 1.235522 | 0.869195 | 0.460984 | 993  | 46  | 947  |
| 365 Glaucoma       | 0.587628 | 1.235499 | 0.869446 | 0.462465 | 1006 | 51  | 955  |

|                     |          |          |          |          |      |     |      |
|---------------------|----------|----------|----------|----------|------|-----|------|
| 293.1 Swelling, m   | 0.536511 | 1.26691  | 0.851597 | 0.467141 | 1071 | 35  | 1036 |
| 250.24 Type 2 diab  | 0.776195 | 1.552411 | 1.135054 | 0.471508 | 847  | 38  | 809  |
| 689 Disorder of     | 0.462192 | 1.33229  | 0.821626 | 0.472386 | 1044 | 24  | 1020 |
| 789 Nausea anc      | 0.850607 | 1.371271 | 1.090795 | 0.474163 | 1046 | 93  | 953  |
| 291 Other speci     | 0.692393 | 1.778296 | 1.185559 | 0.478681 | 961  | 17  | 944  |
| 218.1 Uterine leic  | 0.773903 | 1.545539 | 1.130298 | 0.47973  | 983  | 31  | 952  |
| 807 Fracture of     | 0.282199 | 1.548173 | 0.735026 | 0.486226 | 964  | 10  | 954  |
| 442.1 Aortic aneu   | 0.732966 | 1.657773 | 1.155593 | 0.487386 | 940  | 26  | 914  |
| 427.1 Paroxysmal    | 0.718075 | 1.152009 | 0.919843 | 0.487416 | 527  | 110 | 417  |
| 426.3 Bundle brai   | 0.531227 | 1.283538 | 0.855584 | 0.489474 | 449  | 32  | 417  |
| 452.2 Deep vein t   | 0.61822  | 1.953951 | 1.220753 | 0.492852 | 872  | 11  | 861  |
| 426.91 Cardiac pac  | 0.809085 | 1.482491 | 1.110611 | 0.494249 | 477  | 60  | 417  |
| 618.6 Vaginal ent   | 0.354094 | 1.459427 | 0.779095 | 0.497084 | 1056 | 13  | 1043 |
| 727.6 Rupture of    | 0.334224 | 1.521806 | 0.768131 | 0.497745 | 704  | 12  | 692  |
| 279 Disorders ir    | 0.576596 | 1.254764 | 0.873778 | 0.498763 | 1038 | 42  | 996  |
| 275.6 Hypercalcei   | 0.697577 | 1.832641 | 1.182135 | 0.500077 | 1044 | 23  | 1021 |
| 112 Candidiasis     | 0.75932  | 1.558815 | 1.130504 | 0.500361 | 995  | 30  | 965  |
| 727.2 Bursitis disc | 0.370597 | 1.453524 | 0.789143 | 0.501533 | 706  | 14  | 692  |
| 365.11 Primary op   | 0.386264 | 1.476722 | 0.795238 | 0.505478 | 972  | 17  | 955  |
| 443 Peripheral \    | 0.800673 | 1.466415 | 1.10788  | 0.506555 | 966  | 52  | 914  |
| 350.1 Abnormal ii   | 0.626536 | 2.008566 | 1.219905 | 0.506652 | 1015 | 13  | 1002 |
| 175 Acquired ak     | 0.345374 | 1.491694 | 0.779885 | 0.50931  | 820  | 13  | 807  |
| 53.1 Herpes zost    | 0.302724 | 1.55169  | 0.756263 | 0.509838 | 921  | 10  | 911  |
| 338.2 Chronic pai   | 0.426763 | 1.382478 | 0.818491 | 0.512036 | 1020 | 19  | 1001 |
| 696 Psoriasis an    | 0.353768 | 1.457287 | 0.785616 | 0.512145 | 860  | 13  | 847  |
| 426.9 Cardiac pac   | 0.827027 | 1.41778  | 1.093659 | 0.512156 | 494  | 77  | 417  |
| 411.2 Myocardial    | 0.618165 | 1.235185 | 0.891229 | 0.515451 | 745  | 56  | 689  |
| 782.6 Pallor and f  | 0.589645 | 2.070602 | 1.226867 | 0.51594  | 881  | 10  | 871  |
| 350 Abnormal r      | 0.643927 | 1.218481 | 0.900335 | 0.520012 | 1067 | 65  | 1002 |
| 292.1 Aphasia/sp    | 0.475135 | 1.364211 | 0.841217 | 0.524253 | 967  | 23  | 944  |
| 348 Other cond      | 0.693473 | 1.689574 | 1.152069 | 0.531427 | 921  | 20  | 901  |
| 735.2 Acquired tc   | 0.535657 | 1.311067 | 0.86712  | 0.535602 | 961  | 31  | 930  |
| 841 Sprains and     | 0.584829 | 1.260779 | 0.88529  | 0.537099 | 937  | 40  | 897  |

|                      |          |          |          |          |      |    |      |
|----------------------|----------|----------|----------|----------|------|----|------|
| 292.4 Altered me     | 0.564291 | 1.282711 | 0.878458 | 0.539396 | 979  | 35 | 944  |
| 440 Atheroscler      | 0.797748 | 1.459896 | 1.098822 | 0.541421 | 975  | 61 | 914  |
| 835 Internal dei     | 0.765246 | 1.521793 | 1.111701 | 0.545793 | 1039 | 40 | 999  |
| 817 Concussion       | 0.324552 | 1.525452 | 0.783616 | 0.547978 | 1085 | 11 | 1074 |
| 362.27 Drusen (de)   | 0.37189  | 1.538307 | 0.805581 | 0.55062  | 965  | 13 | 952  |
| 478 Throat pain      | 0.339938 | 1.518711 | 0.793869 | 0.550742 | 681  | 11 | 670  |
| 524.3 Anomalies c    | 0.303714 | 1.598903 | 0.773751 | 0.552182 | 1017 | 10 | 1007 |
| 524 Dentofacial      | 0.303714 | 1.598903 | 0.773751 | 0.552182 | 1017 | 10 | 1007 |
| 614.52 Vaginitis an  | 0.443399 | 1.407214 | 0.837534 | 0.552347 | 1041 | 19 | 1022 |
| 622.1 Polyp of col   | 0.366248 | 1.470888 | 0.805994 | 0.552364 | 1072 | 13 | 1059 |
| 227 Benign neo       | 0.656619 | 1.784046 | 1.16409  | 0.552393 | 1074 | 17 | 1057 |
| 414.2 ASCVD          | 0.65784  | 1.818326 | 1.166217 | 0.553626 | 707  | 18 | 689  |
| 502 Postinflamr      | 0.642208 | 1.875545 | 1.177108 | 0.555046 | 950  | 15 | 935  |
| 241.1 Nontoxic ur    | 0.592994 | 1.264575 | 0.892268 | 0.558728 | 774  | 44 | 730  |
| 790.8 Elevated C-    | 0.609521 | 1.869122 | 1.181035 | 0.559159 | 963  | 12 | 951  |
| 747.1 Cardiac con    | 0.798238 | 1.42198  | 1.088568 | 0.560416 | 1080 | 51 | 1029 |
| 741.2 Stiffness of   | 0.570314 | 1.293022 | 0.885391 | 0.562645 | 904  | 36 | 868  |
| 530.3 Stricture an   | 0.617661 | 1.877882 | 1.178529 | 0.562832 | 704  | 13 | 691  |
| 496.21 Obstructive   | 0.668903 | 1.734539 | 1.150327 | 0.565253 | 874  | 20 | 854  |
| 110 Dermatoph        | 0.599959 | 1.267817 | 0.895432 | 0.56536  | 1008 | 43 | 965  |
| 613.7 Other signs    | 0.670095 | 1.754662 | 1.15162  | 0.566533 | 989  | 19 | 970  |
| 370.31 Keratoconjt   | 0.521239 | 1.350576 | 0.870057 | 0.569285 | 906  | 28 | 878  |
| 345.1 Epilepsy       | 0.638229 | 1.81325  | 1.161569 | 0.574837 | 916  | 15 | 901  |
| 199 Neoplasm c       | 0.791211 | 1.443977 | 1.089344 | 0.575487 | 1023 | 57 | 966  |
| 365.1 Open-angle     | 0.563104 | 1.319115 | 0.885361 | 0.577406 | 993  | 38 | 955  |
| 619 Noninflamr       | 0.600398 | 1.263032 | 0.899364 | 0.578688 | 1072 | 42 | 1030 |
| 286.7 Other and t    | 0.687945 | 1.633813 | 1.128505 | 0.580135 | 939  | 21 | 918  |
| 345.12 Partial epile | 0.602891 | 1.853166 | 1.169126 | 0.583725 | 913  | 12 | 901  |
| 454.1 Varicose ve    | 0.682393 | 1.705015 | 1.137229 | 0.583952 | 883  | 22 | 861  |
| 426.32 Left bundle   | 0.520089 | 1.349152 | 0.876375 | 0.588602 | 442  | 25 | 417  |
| 747 Cardiac anc      | 0.798192 | 1.402241 | 1.079495 | 0.591069 | 1084 | 55 | 1029 |
| 450 Noninfectic      | 0.389146 | 1.514794 | 0.828802 | 0.59462  | 1099 | 14 | 1085 |
| 479 Other uppe       | 0.633367 | 1.25435  | 0.911296 | 0.59477  | 719  | 49 | 670  |



|                    |          |          |          |          |      |     |      |
|--------------------|----------|----------|----------|----------|------|-----|------|
| 256 Ovarian dys    | 0.40933  | 1.441059 | 0.840106 | 0.595382 | 969  | 15  | 954  |
| 772 Symptoms       | 0.647886 | 1.68793  | 1.131538 | 0.603181 | 960  | 14  | 946  |
| 458.1 Orthostatic  | 0.47979  | 1.395988 | 0.867164 | 0.6061   | 1007 | 21  | 986  |
| 612 Breast conc    | 0.35613  | 1.511506 | 0.824563 | 0.609858 | 831  | 11  | 820  |
| 279.1 Immunity d   | 0.596436 | 1.295177 | 0.903544 | 0.610124 | 1037 | 41  | 996  |
| 172 Skin cancer    | 0.697349 | 1.209951 | 0.930892 | 0.611108 | 946  | 81  | 865  |
| 536 Disorders o    | 0.621622 | 1.264933 | 0.911552 | 0.611568 | 1023 | 47  | 976  |
| 353.2 Nerve root   | 0.384349 | 1.508392 | 0.836276 | 0.615762 | 932  | 13  | 919  |
| 558 Noninfectic    | 0.722332 | 1.542492 | 1.101158 | 0.617426 | 802  | 28  | 774  |
| 801 Fracture of    | 0.75962  | 1.477127 | 1.088115 | 0.618699 | 997  | 43  | 954  |
| 426 Cardiac con    | 0.767333 | 1.162739 | 0.948917 | 0.619846 | 595  | 178 | 417  |
| 619.2 Disorders o  | 0.495965 | 1.391685 | 0.876279 | 0.620523 | 1053 | 23  | 1030 |
| 250.6 Polyneurop   | 0.667056 | 1.651242 | 1.11961  | 0.624076 | 830  | 21  | 809  |
| 503 Pulmonary      | 0.58484  | 1.896897 | 1.159188 | 0.626831 | 948  | 13  | 935  |
| 624.9 stress incor | 0.618418 | 1.285972 | 0.914016 | 0.632164 | 1022 | 45  | 977  |
| 530.11 GERD        | 0.882083 | 1.219207 | 1.040025 | 0.633306 | 956  | 265 | 691  |
| 528 Diseases of    | 0.382904 | 1.546465 | 0.841172 | 0.633445 | 1059 | 13  | 1046 |
| 527 Diseases of    | 0.346321 | 1.664606 | 0.825602 | 0.636499 | 1057 | 11  | 1046 |
| 456 Chronic ver    | 0.605133 | 1.844664 | 1.14352  | 0.640636 | 875  | 14  | 861  |
| 225.1 Benign neo   | 0.349473 | 1.625408 | 0.830708 | 0.642312 | 1084 | 11  | 1073 |
| 225 Benign neo     | 0.349473 | 1.625408 | 0.830708 | 0.642312 | 1084 | 11  | 1073 |
| 599.4 Urinary inci | 0.803945 | 1.367773 | 1.064735 | 0.643266 | 843  | 72  | 771  |
| 803 Fracture of    | 0.727487 | 1.537433 | 1.092436 | 0.644352 | 989  | 35  | 954  |
| 217 Vascular ha    | 0.342723 | 1.613358 | 0.830676 | 0.645833 | 876  | 10  | 866  |
| 433.5 Cerebral an  | 0.341661 | 1.593374 | 0.831603 | 0.646615 | 890  | 10  | 880  |
| 281.12 Other vitan | 0.418928 | 1.551429 | 0.85777  | 0.647867 | 994  | 15  | 979  |
| 703 Diseases of    | 0.330071 | 1.659303 | 0.826524 | 0.651738 | 1011 | 10  | 1001 |
| 596 Other disor    | 0.481376 | 1.444604 | 0.880162 | 0.653169 | 1043 | 20  | 1023 |
| 586.2 Cyst of kidn | 0.661715 | 1.632469 | 1.107595 | 0.657343 | 1003 | 21  | 982  |
| 695.4 Lupus (loca  | 0.625395 | 1.69465  | 1.117306 | 0.660041 | 889  | 15  | 874  |
| 771 Musculoske     | 0.489853 | 1.418761 | 0.886159 | 0.660976 | 993  | 21  | 972  |
| 457.3 Encounter f  | 0.701243 | 1.586265 | 1.095325 | 0.663359 | 891  | 30  | 861  |
| 575 Other biliar   | 0.531742 | 1.987536 | 1.159682 | 0.664346 | 1054 | 10  | 1044 |

|                     |          |          |          |          |      |     |      |
|---------------------|----------|----------|----------|----------|------|-----|------|
| 735.21 Hammer to    | 0.526038 | 1.405767 | 0.896123 | 0.664821 | 955  | 25  | 930  |
| 429 Ill-defined c   | 0.700811 | 1.231394 | 0.940073 | 0.667519 | 862  | 85  | 777  |
| 353 Nerve root      | 0.431751 | 1.487929 | 0.871547 | 0.669172 | 934  | 15  | 919  |
| 521.1 Dental carie  | 0.492733 | 1.406416 | 0.890401 | 0.669187 | 1027 | 20  | 1007 |
| 521 Diseases of     | 0.492733 | 1.406416 | 0.890401 | 0.669187 | 1027 | 20  | 1007 |
| 327.7 Sleep relate  | 0.694771 | 1.561867 | 1.091084 | 0.673032 | 847  | 27  | 820  |
| 427.11 Paroxysmal   | 0.710227 | 1.215693 | 0.944937 | 0.678614 | 490  | 73  | 417  |
| 370 Keratitis       | 0.600111 | 1.332512 | 0.918768 | 0.678825 | 917  | 39  | 878  |
| 766 Neuralgia, r    | 0.641059 | 1.281287 | 0.929747 | 0.681708 | 956  | 47  | 909  |
| 530 Diseases of     | 0.879655 | 1.207996 | 1.033524 | 0.682524 | 975  | 284 | 691  |
| 568 Other disor     | 0.396023 | 1.531294 | 0.867016 | 0.686704 | 980  | 12  | 968  |
| 218 Benign neo      | 0.738432 | 1.458203 | 1.071088 | 0.689284 | 988  | 36  | 952  |
| 290.3 Other persi   | 0.611195 | 1.832783 | 1.117148 | 0.695593 | 961  | 17  | 944  |
| 362.29 Macular de   | 0.407678 | 1.662067 | 0.869585 | 0.696136 | 966  | 14  | 952  |
| 705.8 Hyperhidro    | 0.378372 | 1.617622 | 0.865111 | 0.700936 | 958  | 11  | 947  |
| 278.4 Abnormal v    | 0.743383 | 1.437179 | 1.065637 | 0.70258  | 878  | 47  | 831  |
| 355 Complex re      | 0.42049  | 1.5218   | 0.881141 | 0.706026 | 932  | 13  | 919  |
| 214.1 Lipoma of s   | 0.422452 | 1.564038 | 0.882865 | 0.714727 | 1071 | 14  | 1057 |
| 367.9 Blindness a   | 0.411653 | 1.588055 | 0.879813 | 0.715601 | 1002 | 13  | 989  |
| 242.1 Graves' dise  | 0.407696 | 1.569745 | 0.880438 | 0.717511 | 743  | 13  | 730  |
| 255 Disorders o     | 0.589705 | 1.774604 | 1.108005 | 0.718059 | 969  | 15  | 954  |
| 250.4 Abnormal g    | 0.70473  | 1.238928 | 0.9493   | 0.718454 | 888  | 79  | 809  |
| 355.1 Chronic pai   | 0.441883 | 1.553315 | 0.889854 | 0.718953 | 934  | 15  | 919  |
| 429.2 Abnormal f    | 0.618775 | 1.333577 | 0.93175  | 0.719132 | 820  | 43  | 777  |
| 110.1 Dermatoph     | 0.619227 | 1.326664 | 0.932219 | 0.719862 | 1005 | 40  | 965  |
| 369 Infection of    | 0.50537  | 1.458139 | 0.908257 | 0.72509  | 897  | 19  | 878  |
| 574.12 Cholelithias | 0.413965 | 1.611526 | 0.884033 | 0.726564 | 1058 | 14  | 1044 |
| 245.2 Chronic thy   | 0.486971 | 1.460554 | 0.905151 | 0.727478 | 749  | 19  | 730  |
| 245.21 Chronic lyr  | 0.486971 | 1.460554 | 0.905151 | 0.727478 | 749  | 19  | 730  |
| 512.8 Cough         | 0.787176 | 1.177499 | 0.965314 | 0.729923 | 684  | 271 | 413  |
| 274.1 Gout          | 0.621233 | 1.691922 | 1.090894 | 0.736294 | 1082 | 19  | 1063 |
| 535.8 Other speci   | 0.521794 | 1.436645 | 0.9164   | 0.739091 | 998  | 22  | 976  |
| 591 Urinary trac    | 0.808568 | 1.153549 | 0.97038  | 0.739754 | 976  | 226 | 750  |

|                     |          |          |          |          |      |     |      |
|---------------------|----------|----------|----------|----------|------|-----|------|
| 763 Thoracic or     | 0.739765 | 1.424715 | 1.05504  | 0.748789 | 953  | 44  | 909  |
| 362 Other retin     | 0.686866 | 1.282156 | 0.95122  | 0.753907 | 1019 | 67  | 952  |
| 681.7 Cellulitis an | 0.528465 | 1.851056 | 1.106229 | 0.754287 | 953  | 10  | 943  |
| 288.1 Decreased v   | 0.522986 | 1.804379 | 1.102893 | 0.754479 | 977  | 10  | 967  |
| 252.1 Hyperparat    | 0.660716 | 1.557272 | 1.070569 | 0.755849 | 978  | 24  | 954  |
| 535 Gastritis an    | 0.58981  | 1.372851 | 0.935286 | 0.758437 | 1008 | 32  | 976  |
| 246.7 Abnormal r    | 0.396445 | 1.66164  | 0.891891 | 0.759964 | 742  | 12  | 730  |
| 700 Corns and c     | 0.383175 | 1.744919 | 0.888817 | 0.7606   | 963  | 10  | 953  |
| 362.2 Degenerati    | 0.626064 | 1.367089 | 0.941318 | 0.761527 | 996  | 44  | 952  |
| 497 Bronchitis      | 0.640677 | 1.606012 | 1.07334  | 0.764433 | 878  | 24  | 854  |
| 772.3 Muscle wea    | 0.693498 | 1.2666   | 0.954885 | 0.764589 | 1009 | 63  | 946  |
| 345.3 Convulsion:   | 0.59527  | 1.369582 | 0.937892 | 0.765031 | 934  | 33  | 901  |
| 695 Erythematc      | 0.685504 | 1.273909 | 0.95487  | 0.770848 | 943  | 56  | 887  |
| 440.22 Atheroscler  | 0.484578 | 1.533428 | 0.917735 | 0.773137 | 932  | 18  | 914  |
| 296.22 Major depr   | 0.723256 | 1.473146 | 1.053545 | 0.774178 | 729  | 47  | 682  |
| 801.1 Fracture of   | 0.445763 | 1.572052 | 0.910769 | 0.775463 | 968  | 14  | 954  |
| 411.3 Angina pect   | 0.804035 | 1.308374 | 1.035907 | 0.77573  | 793  | 104 | 689  |
| 800 Fracture of     | 0.548731 | 1.427083 | 0.932201 | 0.775947 | 978  | 24  | 954  |
| 433.21 Cerebral ar  | 0.665998 | 1.302756 | 0.952869 | 0.77893  | 932  | 52  | 880  |
| 446 Polyarteriti    | 0.497833 | 1.952297 | 1.104419 | 0.779646 | 924  | 10  | 914  |
| 523.1 Gingivitis    | 0.445613 | 1.561639 | 0.913707 | 0.782288 | 1021 | 14  | 1007 |
| 241 Nontoxic no     | 0.728751 | 1.237365 | 0.963378 | 0.782529 | 819  | 89  | 730  |
| 747.11 Cardiac shu  | 0.709191 | 1.442826 | 1.049741 | 0.78739  | 1063 | 34  | 1029 |
| 805 Fracture of     | 0.593755 | 1.762328 | 1.075215 | 0.794509 | 974  | 20  | 954  |
| 743.2 Pathologic f  | 0.549886 | 1.820024 | 1.082521 | 0.79798  | 733  | 13  | 720  |
| 530.1 Esophagitis   | 0.866119 | 1.196318 | 1.021001 | 0.800171 | 963  | 272 | 691  |
| 530.9 Heartburn     | 0.451483 | 1.524501 | 0.923922 | 0.802636 | 705  | 14  | 691  |
| 686 Other local     | 0.421816 | 1.63112  | 0.916543 | 0.804642 | 955  | 12  | 943  |
| 443.1 Raynaud's s   | 0.403476 | 1.671445 | 0.912744 | 0.805096 | 925  | 11  | 914  |
| 250.1 Type 1 diab   | 0.668257 | 1.505444 | 1.052012 | 0.806961 | 838  | 29  | 809  |
| 720 Spinal stenc    | 0.675456 | 1.305025 | 0.95965  | 0.807047 | 848  | 51  | 797  |
| 341 Other demy      | 0.390645 | 1.640675 | 0.912624 | 0.80806  | 911  | 10  | 901  |
| 433.3 Cerebral isc  | 0.742107 | 1.236686 | 0.96905  | 0.80958  | 975  | 95  | 880  |

|                    |          |          |          |          |      |     |      |
|--------------------|----------|----------|----------|----------|------|-----|------|
| 720.1 Spinal stenc | 0.699636 | 1.471745 | 1.046705 | 0.810635 | 832  | 35  | 797  |
| 370.3 Keratoconju  | 0.598003 | 1.413857 | 0.950067 | 0.816688 | 910  | 32  | 878  |
| 426.92 Cardiac def | 0.638895 | 1.612774 | 1.056125 | 0.817149 | 441  | 24  | 417  |
| 382 Otagia         | 0.575384 | 1.418933 | 0.94808  | 0.818694 | 944  | 26  | 918  |
| 870 Open woun      | 0.565049 | 1.753842 | 1.069463 | 0.818745 | 1021 | 16  | 1005 |
| 599.2 Retention c  | 0.581117 | 1.426067 | 0.94874  | 0.819684 | 798  | 27  | 771  |
| 979 Adverse dru    | 0.624735 | 1.387153 | 0.955177 | 0.822393 | 1020 | 38  | 982  |
| 526 Diseases of    | 0.550438 | 1.74555  | 1.068255 | 0.824874 | 1021 | 14  | 1007 |
| 429.3 Symptoms i   | 0.600351 | 1.418862 | 0.952494 | 0.825099 | 810  | 33  | 777  |
| 738.4 Acquired sp  | 0.525071 | 1.499913 | 0.942216 | 0.826404 | 950  | 20  | 930  |
| 350.3 Lack of coo  | 0.497999 | 1.515102 | 0.939176 | 0.827514 | 1018 | 16  | 1002 |
| 483 Acute bron     | 0.794621 | 1.302374 | 1.026654 | 0.834511 | 938  | 101 | 837  |
| 425 Cardiomyo      | 0.723754 | 1.266154 | 0.972392 | 0.844835 | 1053 | 77  | 976  |
| 687.1 Rash and of  | 0.759823 | 1.227007 | 0.976359 | 0.844896 | 891  | 105 | 786  |
| 427.5 Arrhythmia   | 0.765081 | 1.228096 | 0.977082 | 0.847144 | 527  | 110 | 417  |
| 442 Other aneu     | 0.655727 | 1.518884 | 1.042085 | 0.848671 | 943  | 29  | 914  |
| 565.1 Anal and re  | 0.500261 | 1.554261 | 0.946737 | 0.852387 | 985  | 17  | 968  |
| 736 Other acqu     | 0.422304 | 1.623045 | 0.937521 | 0.853716 | 941  | 11  | 930  |
| 276.1 Electrolyte  | 0.799201 | 1.287789 | 1.022441 | 0.855257 | 972  | 114 | 858  |
| 613.8 Other speci  | 0.536234 | 1.476608 | 0.95365  | 0.855815 | 989  | 19  | 970  |
| 550.2 Diaphragm    | 0.678402 | 1.322072 | 0.969761 | 0.857491 | 1050 | 50  | 1000 |
| 740.9 Osteoarthr   | 0.845172 | 1.21081  | 1.016222 | 0.860427 | 940  | 219 | 721  |
| 275.5 Disorders o  | 0.501167 | 1.620079 | 0.94866  | 0.861135 | 1039 | 18  | 1021 |
| 695.42 Systemic lu | 0.543013 | 1.657785 | 1.049249 | 0.865456 | 887  | 13  | 874  |
| 269 Proteinuria    | 0.450208 | 1.648456 | 0.944776 | 0.865651 | 1082 | 13  | 1069 |
| 357 Inflammato     | 0.496161 | 1.592505 | 0.951099 | 0.868027 | 1010 | 17  | 993  |
| 830 Dislocation    | 0.663482 | 1.348454 | 0.970668 | 0.87001  | 1044 | 45  | 999  |
| 53 Herpes zost     | 0.572375 | 1.468681 | 0.962894 | 0.87632  | 935  | 24  | 911  |
| 586 Other disor    | 0.707825 | 1.406822 | 1.027559 | 0.877147 | 1026 | 44  | 982  |
| 300.4 Dysthymic    | 0.562232 | 1.518717 | 0.96255  | 0.881059 | 707  | 25  | 682  |
| 425.2 Secondary/   | 0.648921 | 1.50198  | 1.032341 | 0.882665 | 1005 | 29  | 976  |
| 333 Extrapyram     | 0.603667 | 1.585669 | 1.036636 | 0.884937 | 921  | 20  | 901  |
| 367.2 Astigmatism  | 0.475292 | 1.624021 | 0.955123 | 0.88546  | 1003 | 14  | 989  |

|                     |          |          |          |          |      |     |      |
|---------------------|----------|----------|----------|----------|------|-----|------|
| 433.8 Late effects  | 0.547383 | 1.523128 | 0.962758 | 0.885549 | 901  | 21  | 880  |
| 327.71 Restless leg | 0.599448 | 1.565461 | 1.033782 | 0.89276  | 840  | 20  | 820  |
| 276.13 Hyperpotas   | 0.601739 | 1.625891 | 1.034531 | 0.894423 | 882  | 24  | 858  |
| 741.3 Difficulty in | 0.571636 | 1.502129 | 0.967841 | 0.895465 | 892  | 24  | 868  |
| 535.2 Atrophic ga   | 0.506012 | 1.564491 | 0.962642 | 0.896715 | 992  | 16  | 976  |
| 290.1 Dementias     | 0.647961 | 1.557588 | 1.028726 | 0.899627 | 975  | 31  | 944  |
| 252 Disorders o     | 0.630331 | 1.512093 | 1.028032 | 0.902083 | 979  | 25  | 954  |
| 369.5 Conjunctivi   | 0.452718 | 1.671422 | 0.959911 | 0.904004 | 889  | 11  | 878  |
| 362.26 Macular pu   | 0.46435  | 1.868631 | 1.043865 | 0.905915 | 962  | 10  | 952  |
| 550 Abdominal       | 0.725774 | 1.289709 | 0.98406  | 0.912976 | 1069 | 69  | 1000 |
| 523 Gingival an     | 0.575346 | 1.595596 | 1.029026 | 0.913132 | 1025 | 18  | 1007 |
| 425.1 Primary/int   | 0.744368 | 1.333647 | 1.015597 | 0.91732  | 1041 | 65  | 976  |
| 245 Thyroiditis     | 0.58797  | 1.455859 | 0.978025 | 0.924166 | 755  | 25  | 730  |
| 782.3 Edema         | 0.793817 | 1.219798 | 0.990181 | 0.928229 | 1018 | 147 | 871  |
| 459 Other disor     | 0.544493 | 1.671928 | 1.026326 | 0.928706 | 1002 | 16  | 986  |
| 8 Intestinal ir     | 0.522657 | 1.605005 | 0.975896 | 0.933034 | 1089 | 18  | 1071 |
| 722.1 Displaceme    | 0.634906 | 1.403104 | 0.983205 | 0.933621 | 828  | 31  | 797  |
| 418.1 Precordial p  | 0.65731  | 1.434754 | 1.016427 | 0.934416 | 437  | 26  | 411  |
| 433.12 Cerebral at  | 0.529426 | 1.723402 | 1.025136 | 0.935272 | 896  | 16  | 880  |
| 440.2 Atheroscler   | 0.5616   | 1.537883 | 0.979455 | 0.936357 | 936  | 22  | 914  |
| 214 Lipoma          | 0.564885 | 1.637747 | 1.021834 | 0.937466 | 1076 | 19  | 1057 |
| 512.2 Painful resp  | 0.580346 | 1.507943 | 0.981891 | 0.940627 | 440  | 27  | 413  |
| 356 Hereditary      | 0.707744 | 1.33047  | 0.988921 | 0.94502  | 1053 | 60  | 993  |
| 300.11 Generalizec  | 0.572594 | 1.62632  | 1.018016 | 0.946925 | 703  | 21  | 682  |
| 681 Superficial c   | 0.736705 | 1.290996 | 0.990757 | 0.948372 | 1016 | 73  | 943  |
| 342 Hemiplegia      | 0.446521 | 1.849612 | 1.023817 | 0.949201 | 911  | 10  | 901  |
| 596.5 Functional c  | 0.487961 | 1.669536 | 0.979913 | 0.949406 | 1037 | 14  | 1023 |
| 433.31 Transient c  | 0.753715 | 1.272558 | 0.992116 | 0.952827 | 967  | 87  | 880  |
| 740 Osteoarthro     | 0.846746 | 1.163181 | 0.995372 | 0.954231 | 1029 | 308 | 721  |
| 569.2 Gastrointes   | 0.577625 | 1.54647  | 1.014289 | 0.955155 | 987  | 19  | 968  |
| 519.9 Symptoms i    | 0.541916 | 1.600351 | 0.985489 | 0.958234 | 1060 | 19  | 1041 |
| 741.4 Joint effusio | 0.707326 | 1.365939 | 1.008055 | 0.962012 | 915  | 47  | 868  |
| 295 Schizophre      | 0.491664 | 1.750561 | 0.984819 | 0.96246  | 696  | 14  | 682  |

|                     |          |          |          |          |      |     |                                      |
|---------------------|----------|----------|----------|----------|------|-----|--------------------------------------|
| 562.2 Diverticuliti | 0.504278 | 1.6338   | 0.987079 | 0.965918 | 788  | 14  | 774                                  |
| 457 Encounter f     | 0.647286 | 1.46425  | 1.008865 | 0.966399 | 894  | 33  | 861                                  |
| 377 Disorders o     | 0.479834 | 1.745    | 0.987792 | 0.970707 | 909  | 13  | 896                                  |
| 579 Other symp      | 0.697603 | 1.348063 | 0.995493 | 0.978601 | 952  | 48  | 904                                  |
| 275 Disorders o     | 0.702685 | 1.379392 | 1.004571 | 0.978917 | 1073 | 52  | 1021                                 |
| 740.1 Osteoarthri   | 0.797729 | 1.226027 | 0.997191 | 0.979507 | 854  | 133 | 721                                  |
| 241.2 Nontoxic m    | 0.735148 | 1.318915 | 1.003464 | 0.981518 | 798  | 68  | 730                                  |
| 727.4 Ganglion ar   | 0.571469 | 1.54346  | 0.994354 | 0.982312 | 712  | 20  | 692                                  |
| 426.23 Second deg   | 0.494454 | 1.708459 | 1.006713 | 0.983192 | 429  | 12  | 417                                  |
| 724 Other and t     | 0.624752 | 1.456436 | 0.995817 | 0.984626 | 824  | 27  | 797                                  |
| 345 Epilepsy, re    | 0.678001 | 1.39564  | 1.003526 | 0.984831 | 942  | 41  | 901                                  |
| 740.11 Osteoarthr   | 0.786728 | 1.241062 | 0.998103 | 0.986963 | 833  | 112 | 721                                  |
| 244.1 Secondary l   | 0.683549 | 1.382487 | 1.001574 | 0.993043 | 774  | 44  | 730                                  |
| 281 Other defic     | 0.577373 | 1.575869 | 0.997961 | 0.993686 | 1001 | 22  | 979                                  |
| 281.1 Megaloblas    | 0.577373 | 1.575869 | 0.997961 | 0.993686 | 1001 | 22  | 979                                  |
| 361 Retinal det     | 0.462345 | 1.734136 | 1.002374 | 0.994507 | 966  | 11  | 955                                  |
| 726.3 Bursitis      | 0.610029 | 1.491955 | 1.001279 | 0.995558 | 716  | 24  | 692                                  |
| 531 Peptic ulcer    | 0.519094 | 1.65327  | 0.998472 | 0.995937 | 1073 | 16  | 1057                                 |
| 290 Delirium de     | 0.632492 | 1.511715 | 1.000949 | 0.996606 | 976  | 32  | 944                                  |
| 537 Other disor     | 0.545266 | 1.593712 | 0.999022 | 0.997173 | 994  | 18  | 976                                  |
| 578.8 Hemorrhag     | 0.569962 | 1.564945 | 1.000825 | 0.997476 | 925  | 21  | 904                                  |
| 240 Simple and      | 0.627026 | 1.447565 | 0.999388 | 0.997721 | 759  | 29  | 730                                  |
| 681.3 Cellulitis an | 0.460742 | 1.743636 | 0.999045 | 0.997803 | 954  | 11  | 943                                  |
| 261.2 Vitamin B-c   | 0.716098 | 1.336734 | 1.000156 | 0.999222 | 886  | 56  | 830                                  |
| 70.2 Viral hepati   | NA       | NA       | NA       | NA       | 912  | 1   | 911 [Error: < 10 cases or controls]  |
| 755.6 Other cong    | NA       | NA       | NA       | NA       | 1074 | 1   | 1073 [Error: < 10 cases or controls] |
| 710.12 Chronic ost  | NA       | NA       | NA       | NA       | 915  | 1   | 914 [Error: < 10 cases or controls]  |
| 802 Fracture of     | NA       | NA       | NA       | NA       | 955  | 1   | 954 [Error: < 10 cases or controls]  |
| 525.2 Atrophy of    | NA       | NA       | NA       | NA       | 1008 | 1   | 1007 [Error: < 10 cases or controls] |
| 41.2 Streptococ     | NA       | NA       | NA       | NA       | 1054 | 1   | 1053 [Error: < 10 cases or controls] |
| 255.12 Hyperaldos   | NA       | NA       | NA       | NA       | 955  | 1   | 954 [Error: < 10 cases or controls]  |
| 441.2 Chronic vas   | NA       | NA       | NA       | NA       | 915  | 1   | 914 [Error: < 10 cases or controls]  |
| 531.3 Duodenal u    | NA       | NA       | NA       | NA       | 1058 | 1   | 1057 [Error: < 10 cases or controls] |

|                     |    |    |    |      |   |                                      |
|---------------------|----|----|----|------|---|--------------------------------------|
| 592.3 Urethral str  | NA | NA | NA | 751  | 1 | 750 [Error: < 10 cases or controls]  |
| 358 Myoneural       | NA | NA | NA | 994  | 1 | 993 [Error: < 10 cases or controls]  |
| 277.51 Lipoprotein  | NA | NA | NA | 1065 | 1 | 1064 [Error: < 10 cases or controls] |
| 791 Gangrene        | NA | NA | NA | 1101 | 1 | 1100 [Error: < 10 cases or controls] |
| 458.2 Iatrogenic f  | NA | NA | NA | 987  | 1 | 986 [Error: < 10 cases or controls]  |
| 444.1 Arterial em   | NA | NA | NA | 915  | 1 | 914 [Error: < 10 cases or controls]  |
| 189.4 Malignant r   | NA | NA | NA | 1090 | 1 | 1089 [Error: < 10 cases or controls] |
| 446.3 Hypersensit   | NA | NA | NA | 915  | 1 | 914 [Error: < 10 cases or controls]  |
| 446.8 Thrombotic    | NA | NA | NA | 915  | 1 | 914 [Error: < 10 cases or controls]  |
| 588.1 Renal osteo   | NA | NA | NA | 983  | 1 | 982 [Error: < 10 cases or controls]  |
| 614.53 Cyst or abs  | NA | NA | NA | 1023 | 1 | 1022 [Error: < 10 cases or controls] |
| 204.12 Lymphoid l   | NA | NA | NA | 1090 | 1 | 1089 [Error: < 10 cases or controls] |
| 530.12 Ulcer of esc | NA | NA | NA | 692  | 1 | 691 [Error: < 10 cases or controls]  |
| 870.6 Open woun     | NA | NA | NA | 1006 | 1 | 1005 [Error: < 10 cases or controls] |
| 301.2 Antisocial/k  | NA | NA | NA | 683  | 1 | 682 [Error: < 10 cases or controls]  |
| 526.1 Cysts of the  | NA | NA | NA | 1008 | 1 | 1007 [Error: < 10 cases or controls] |
| 654.1 Abnormalit    | NA | NA | NA | 1098 | 1 | 1097 [Error: < 10 cases or controls] |
| 170.1 Bone cance    | NA | NA | NA | 1096 | 1 | 1095 [Error: < 10 cases or controls] |
| 384 Other disor     | NA | NA | NA | 919  | 1 | 918 [Error: < 10 cases or controls]  |
| 972.1 Cardiac rhy   | NA | NA | NA | 983  | 1 | 982 [Error: < 10 cases or controls]  |
| 379.3 Aphakia an    | NA | NA | NA | 897  | 1 | 896 [Error: < 10 cases or controls]  |
| 694.3 Vascular di   | NA | NA | NA | 888  | 1 | 887 [Error: < 10 cases or controls]  |
| 277.6 Other defic   | NA | NA | NA | 1065 | 1 | 1064 [Error: < 10 cases or controls] |
| 732.7 Osteochon     | NA | NA | NA | 901  | 1 | 900 [Error: < 10 cases or controls]  |
| 519.8 Other disea   | NA | NA | NA | 1042 | 1 | 1041 [Error: < 10 cases or controls] |
| 452.1 Iatrogenic r  | NA | NA | NA | 862  | 1 | 861 [Error: < 10 cases or controls]  |
| 190 Cancer of e     | NA | NA | NA | 1074 | 1 | 1073 [Error: < 10 cases or controls] |
| 385.3 Cholesteat    | NA | NA | NA | 919  | 1 | 918 [Error: < 10 cases or controls]  |
| 597.1 Urethral str  | NA | NA | NA | 1024 | 1 | 1023 [Error: < 10 cases or controls] |
| 989 Toxic effect    | NA | NA | NA | 1097 | 1 | 1096 [Error: < 10 cases or controls] |
| 253.3 Diabetes in   | NA | NA | NA | 955  | 1 | 954 [Error: < 10 cases or controls]  |
| 732.1 Juvenile ost  | NA | NA | NA | 901  | 1 | 900 [Error: < 10 cases or controls]  |
| 334.21 Amyotroph    | NA | NA | NA | 902  | 1 | 901 [Error: < 10 cases or controls]  |

|                                                      |    |    |    |      |   |      |                                 |
|------------------------------------------------------|----|----|----|------|---|------|---------------------------------|
| 870.4 Open wound                                     | NA | NA | NA | 1006 | 1 | 1005 | [Error: < 10 cases or controls] |
| 70.1 Viral hepatitis                                 | NA | NA | NA | 912  | 1 | 911  | [Error: < 10 cases or controls] |
| 360.2 Progressive                                    | NA | NA | NA | 956  | 1 | 955  | [Error: < 10 cases or controls] |
| 218.2 Other benign                                   | NA | NA | NA | 953  | 1 | 952  | [Error: < 10 cases or controls] |
| 990 Effects radiation                                | NA | NA | NA | 1088 | 1 | 1087 | [Error: < 10 cases or controls] |
| 134.1 Intestinal hemorrhage                          | NA | NA | NA | 1090 | 1 | 1089 | [Error: < 10 cases or controls] |
| 737.1 Kyphosis (acute)                               | NA | NA | NA | 931  | 1 | 930  | [Error: < 10 cases or controls] |
| 260.7 Polyphagia                                     | NA | NA | NA | 831  | 1 | 830  | [Error: < 10 cases or controls] |
| 580.14 Chronic glomerulonephritis                    | NA | NA | NA | 983  | 1 | 982  | [Error: < 10 cases or controls] |
| 295.2 Paranoid delirium                              | NA | NA | NA | 683  | 1 | 682  | [Error: < 10 cases or controls] |
| 716.8 Palindromic                                    | NA | NA | NA | 915  | 1 | 914  | [Error: < 10 cases or controls] |
| 270.1 Disturbance of consciousness                   | NA | NA | NA | 1070 | 1 | 1069 | [Error: < 10 cases or controls] |
| 443.7 Peripheral neuropathy                          | NA | NA | NA | 915  | 1 | 914  | [Error: < 10 cases or controls] |
| 501 Pneumonitis                                      | NA | NA | NA | 936  | 1 | 935  | [Error: < 10 cases or controls] |
| 782 Symptoms                                         | NA | NA | NA | 872  | 1 | 871  | [Error: < 10 cases or controls] |
| 250.12 Type 1 diabetes mellitus                      | NA | NA | NA | 810  | 1 | 809  | [Error: < 10 cases or controls] |
| 586.11 Small kidney                                  | NA | NA | NA | 983  | 1 | 982  | [Error: < 10 cases or controls] |
| 711.3 Behcet's syndrome                              | NA | NA | NA | 915  | 1 | 914  | [Error: < 10 cases or controls] |
| 480.11 Pneumococcal meningitis                       | NA | NA | NA | 838  | 1 | 837  | [Error: < 10 cases or controls] |
| 480.5 Bronchopneumonia                               | NA | NA | NA | 838  | 1 | 837  | [Error: < 10 cases or controls] |
| 303 Psychogenic blindness                            | NA | NA | NA | 683  | 1 | 682  | [Error: < 10 cases or controls] |
| 695.2 Bullous dermatitis                             | NA | NA | NA | 888  | 1 | 887  | [Error: < 10 cases or controls] |
| 245.1 Thyroiditis, Hashimoto's                       | NA | NA | NA | 731  | 1 | 730  | [Error: < 10 cases or controls] |
| 636.1 Threatened abortion                            | NA | NA | NA | 1092 | 1 | 1091 | [Error: < 10 cases or controls] |
| 145.3 Cancer of the rectum                           | NA | NA | NA | 1088 | 1 | 1087 | [Error: < 10 cases or controls] |
| 282.8 Other hemiparesis                              | NA | NA | NA | 980  | 1 | 979  | [Error: < 10 cases or controls] |
| 711.1 Pyogenic arthritis                             | NA | NA | NA | 915  | 1 | 914  | [Error: < 10 cases or controls] |
| 705.3 Hidradenitis suppurativa                       | NA | NA | NA | 948  | 1 | 947  | [Error: < 10 cases or controls] |
| 985 Toxic effect of drug                             | NA | NA | NA | 1097 | 1 | 1096 | [Error: < 10 cases or controls] |
| 716.1 Unspecified arthritis                          | NA | NA | NA | 915  | 1 | 914  | [Error: < 10 cases or controls] |
| 816 Cerebral lacunar infarction                      | NA | NA | NA | 1075 | 1 | 1074 | [Error: < 10 cases or controls] |
| 41.11 Methicillin-resistant staphylococcal infection | NA | NA | NA | 1054 | 1 | 1053 | [Error: < 10 cases or controls] |
| 713.5 Arthropathy                                    | NA | NA | NA | 915  | 1 | 914  | [Error: < 10 cases or controls] |



|                                                   |    |    |    |      |   |                                      |
|---------------------------------------------------|----|----|----|------|---|--------------------------------------|
| 252.2 Hypoparathyroidism                          | NA | NA | NA | 955  | 1 | 954 [Error: < 10 cases or controls]  |
| 789.1 Persistent vomiting                         | NA | NA | NA | 954  | 1 | 953 [Error: < 10 cases or controls]  |
| 573.3 Hepatomegaly                                | NA | NA | NA | 923  | 1 | 922 [Error: < 10 cases or controls]  |
| 585.32 End stage renal disease                    | NA | NA | NA | 983  | 1 | 982 [Error: < 10 cases or controls]  |
| 695.22 Pemphigus                                  | NA | NA | NA | 888  | 1 | 887 [Error: < 10 cases or controls]  |
| 962.1 Adrenal cortical hyperplasia                | NA | NA | NA | 983  | 1 | 982 [Error: < 10 cases or controls]  |
| 262 Mineral deficiency                            | NA | NA | NA | 831  | 1 | 830 [Error: < 10 cases or controls]  |
| 709.5 Dermatomyositis                             | NA | NA | NA | 865  | 1 | 864 [Error: < 10 cases or controls]  |
| 134 Helminthiasis                                 | NA | NA | NA | 1090 | 1 | 1089 [Error: < 10 cases or controls] |
| 910 Superficial infections                        | NA | NA | NA | 1099 | 1 | 1098 [Error: < 10 cases or controls] |
| 687.3 Changes in skin color                       | NA | NA | NA | 787  | 1 | 786 [Error: < 10 cases or controls]  |
| 748 Anomalies of skin                             | NA | NA | NA | 1097 | 1 | 1096 [Error: < 10 cases or controls] |
| 728.1 Muscular cramps                             | NA | NA | NA | 693  | 1 | 692 [Error: < 10 cases or controls]  |
| 643 Excessive vomiting                            | NA | NA | NA | 1102 | 1 | 1101 [Error: < 10 cases or controls] |
| 876 Posttraumatic stress disorder                 | NA | NA | NA | 1006 | 1 | 1005 [Error: < 10 cases or controls] |
| 580.32 Nephritis and nephropathy                  | NA | NA | NA | 983  | 1 | 982 [Error: < 10 cases or controls]  |
| 851 Complications of pregnancy                    | NA | NA | NA | 1040 | 1 | 1039 [Error: < 10 cases or controls] |
| 180.1 Cervical carcinoma                          | NA | NA | NA | 910  | 1 | 909 [Error: < 10 cases or controls]  |
| 559 Ileostomy syndrome                            | NA | NA | NA | 775  | 1 | 774 [Error: < 10 cases or controls]  |
| 613.9 Breast disorders                            | NA | NA | NA | 971  | 1 | 970 [Error: < 10 cases or controls]  |
| 151 Cancer of skin                                | NA | NA | NA | 1049 | 1 | 1048 [Error: < 10 cases or controls] |
| 277 Other disorders of skin                       | NA | NA | NA | 1065 | 1 | 1064 [Error: < 10 cases or controls] |
| 710.19 Unspecified infectious diseases            | NA | NA | NA | 915  | 1 | 914 [Error: < 10 cases or controls]  |
| 286.12 Congenital anomalies of blood              | NA | NA | NA | 919  | 1 | 918 [Error: < 10 cases or controls]  |
| 284 Aplastic anemia                               | NA | NA | NA | 980  | 1 | 979 [Error: < 10 cases or controls]  |
| 714.2 Juvenile rheumatoid arthritis               | NA | NA | NA | 926  | 1 | 925 [Error: < 10 cases or controls]  |
| 855 Complications of pregnancy                    | NA | NA | NA | 1040 | 1 | 1039 [Error: < 10 cases or controls] |
| 79.2 Infectious diseases                          | NA | NA | NA | 912  | 1 | 911 [Error: < 10 cases or controls]  |
| 366.3 Traumatic conditions                        | NA | NA | NA | 895  | 1 | 894 [Error: < 10 cases or controls]  |
| 41.12 Methicillin-resistant Staphylococcus aureus | NA | NA | NA | 1054 | 1 | 1053 [Error: < 10 cases or controls] |
| 520.1 Hereditary conditions                       | NA | NA | NA | 1008 | 1 | 1007 [Error: < 10 cases or controls] |
| 499 Cystic fibrosis                               | NA | NA | NA | 1101 | 1 | 1100 [Error: < 10 cases or controls] |
| 159.2 Malignant neoplasms                         | NA | NA | NA | 1049 | 1 | 1048 [Error: < 10 cases or controls] |

|                     |      |    |    |    |      |   |                                      |
|---------------------|------|----|----|----|------|---|--------------------------------------|
| 743.22 Pathologic   | † NA | NA | NA | NA | 721  | 1 | 720 [Error: < 10 cases or controls]  |
| 556.11 Angiodyspl   | NA   | NA | NA | NA | 775  | 1 | 774 [Error: < 10 cases or controls]  |
| 795.81 Elevated ca  | NA   | NA | NA | NA | 1095 | 1 | 1094 [Error: < 10 cases or controls] |
| 522.1 Pulpitis and  | NA   | NA | NA | NA | 1008 | 1 | 1007 [Error: < 10 cases or controls] |
| 614.3 Pelvic inflar | NA   | NA | NA | NA | 1023 | 1 | 1022 [Error: < 10 cases or controls] |
| 634.1 Missed abo    | NA   | NA | NA | NA | 1092 | 1 | 1091 [Error: < 10 cases or controls] |
| 528.5 Diseases of   | NA   | NA | NA | NA | 1047 | 1 | 1046 [Error: < 10 cases or controls] |
| 381.3 Mastoiditis   | NA   | NA | NA | NA | 919  | 1 | 918 [Error: < 10 cases or controls]  |
| 580.13 Acute glom   | NA   | NA | NA | NA | 983  | 1 | 982 [Error: < 10 cases or controls]  |
| 754.1 Lumbosacr     | NA   | NA | NA | NA | 1074 | 1 | 1073 [Error: < 10 cases or controls] |
| 715.2 Ankylosing    | NA   | NA | NA | NA | 926  | 1 | 925 [Error: < 10 cases or controls]  |
| 371.33 Noninfectic  | NA   | NA | NA | NA | 879  | 1 | 878 [Error: < 10 cases or controls]  |
| 251.8 Abnormalit    | NA   | NA | NA | NA | 955  | 1 | 954 [Error: < 10 cases or controls]  |
| 709.4 Polymyositi   | NA   | NA | NA | NA | 865  | 1 | 864 [Error: < 10 cases or controls]  |
| 254 Diseases of     | NA   | NA | NA | NA | 955  | 1 | 954 [Error: < 10 cases or controls]  |
| 255.11 Cushing's s  | NA   | NA | NA | NA | 955  | 1 | 954 [Error: < 10 cases or controls]  |
| 276.42 Alkalosis    | NA   | NA | NA | NA | 859  | 1 | 858 [Error: < 10 cases or controls]  |
| 189.12 Malignant r  | NA   | NA | NA | NA | 1090 | 1 | 1089 [Error: < 10 cases or controls] |
| 384.4 Perforation   | NA   | NA | NA | NA | 919  | 1 | 918 [Error: < 10 cases or controls]  |
| 276.11 Hyperosmo    | NA   | NA | NA | NA | 859  | 1 | 858 [Error: < 10 cases or controls]  |
| 614.31 Acute inflar | NA   | NA | NA | NA | 1023 | 1 | 1022 [Error: < 10 cases or controls] |
| 753.2 Congenital    | NA   | NA | NA | NA | 1085 | 1 | 1084 [Error: < 10 cases or controls] |
| 333.2 Myoclonus     | NA   | NA | NA | NA | 902  | 1 | 901 [Error: < 10 cases or controls]  |
| 529.6 Glossodyn     | NA   | NA | NA | NA | 1047 | 1 | 1046 [Error: < 10 cases or controls] |
| 671 Venous/cer      | NA   | NA | NA | NA | 1101 | 1 | 1100 [Error: < 10 cases or controls] |
| 627.4 Premenopa     | NA   | NA | NA | NA | 664  | 1 | 663 [Error: < 10 cases or controls]  |
| 585.31 Renal dialys | NA   | NA | NA | NA | 983  | 1 | 982 [Error: < 10 cases or controls]  |
| 574.2 Calculus of   | NA   | NA | NA | NA | 1045 | 1 | 1044 [Error: < 10 cases or controls] |
| 962.2 Insulins anc  | NA   | NA | NA | NA | 983  | 1 | 982 [Error: < 10 cases or controls]  |
| 242.31 Thyrotoxic   | † NA | NA | NA | NA | 731  | 1 | 730 [Error: < 10 cases or controls]  |
| 722.9 Other and     | † NA | NA | NA | NA | 798  | 1 | 797 [Error: < 10 cases or controls]  |
| 871.4 Open woun     | NA   | NA | NA | NA | 1006 | 1 | 1005 [Error: < 10 cases or controls] |
| 857 Mechanical      | NA   | NA | NA | NA | 1040 | 1 | 1039 [Error: < 10 cases or controls] |

|                    |    |    |    |      |   |      |                                 |
|--------------------|----|----|----|------|---|------|---------------------------------|
| 277.1 Disorders o  | NA | NA | NA | 1065 | 1 | 1064 | [Error: < 10 cases or controls] |
| 362.7 Hereditary   | NA | NA | NA | 953  | 1 | 952  | [Error: < 10 cases or controls] |
| 80 Postoperati     | NA | NA | NA | 1092 | 1 | 1091 | [Error: < 10 cases or controls] |
| 965 Poisoning b    | NA | NA | NA | 983  | 1 | 982  | [Error: < 10 cases or controls] |
| 306.9 Tension he   | NA | NA | NA | 683  | 1 | 682  | [Error: < 10 cases or controls] |
| 290.2 Delirium du  | NA | NA | NA | 945  | 1 | 944  | [Error: < 10 cases or controls] |
| 253.2 Pituitary hy | NA | NA | NA | 955  | 1 | 954  | [Error: < 10 cases or controls] |
| 312 Conduct dis    | NA | NA | NA | 1089 | 1 | 1088 | [Error: < 10 cases or controls] |
| 459.1 Hemorrhag    | NA | NA | NA | 987  | 1 | 986  | [Error: < 10 cases or controls] |
| 520.2 Disturbanc   | NA | NA | NA | 1008 | 1 | 1007 | [Error: < 10 cases or controls] |
| 350.5 Abnormal r   | NA | NA | NA | 1003 | 1 | 1002 | [Error: < 10 cases or controls] |
| 303.4 Somatoforr   | NA | NA | NA | 683  | 1 | 682  | [Error: < 10 cases or controls] |
| 586.1 Anatomical   | NA | NA | NA | 983  | 1 | 982  | [Error: < 10 cases or controls] |
| 753 Congenital     | NA | NA | NA | 1085 | 1 | 1084 | [Error: < 10 cases or controls] |
| 327.31 Central/nor | NA | NA | NA | 821  | 1 | 820  | [Error: < 10 cases or controls] |
| 575.9 Nonspecific  | NA | NA | NA | 1045 | 1 | 1044 | [Error: < 10 cases or controls] |
| 343 Infantile ce   | NA | NA | NA | 902  | 1 | 901  | [Error: < 10 cases or controls] |
| 531.5 Gastrojejun  | NA | NA | NA | 1058 | 1 | 1057 | [Error: < 10 cases or controls] |
| 710.11 Acute oste  | NA | NA | NA | 915  | 1 | 914  | [Error: < 10 cases or controls] |
| 750.15 Congenital  | NA | NA | NA | 1084 | 1 | 1083 | [Error: < 10 cases or controls] |
| 442.4 Arterial dis | NA | NA | NA | 915  | 1 | 914  | [Error: < 10 cases or controls] |
| 716.2 Unspecific   | NA | NA | NA | 915  | 1 | 914  | [Error: < 10 cases or controls] |
| 969 Poisoning b    | NA | NA | NA | 983  | 1 | 982  | [Error: < 10 cases or controls] |
| 370.2 Superficial  | NA | NA | NA | 879  | 1 | 878  | [Error: < 10 cases or controls] |
| 756.1 Congenital   | NA | NA | NA | 1074 | 1 | 1073 | [Error: < 10 cases or controls] |
| 271 Disorders o    | NA | NA | NA | 1099 | 1 | 1098 | [Error: < 10 cases or controls] |
| 853 Complicatic    | NA | NA | NA | 1040 | 1 | 1039 | [Error: < 10 cases or controls] |
| 244.5 Congenital   | NA | NA | NA | 731  | 1 | 730  | [Error: < 10 cases or controls] |
| 550.3 Femoral he   | NA | NA | NA | 1001 | 1 | 1000 | [Error: < 10 cases or controls] |
| 767 Cervicocrar    | NA | NA | NA | 910  | 1 | 909  | [Error: < 10 cases or controls] |
| 505 Other pulm     | NA | NA | NA | 936  | 1 | 935  | [Error: < 10 cases or controls] |
| 374.2 Lagophthal   | NA | NA | NA | 879  | 1 | 878  | [Error: < 10 cases or controls] |
| 870.1 Open woun    | NA | NA | NA | 1006 | 1 | 1005 | [Error: < 10 cases or controls] |

|                             |    |    |    |      |   |      |                                 |
|-----------------------------|----|----|----|------|---|------|---------------------------------|
| 733.4 Aseptic necrosis      | NA | NA | NA | 901  | 1 | 900  | [Error: < 10 cases or controls] |
| 755.61 Congenital           | NA | NA | NA | 1074 | 1 | 1073 | [Error: < 10 cases or controls] |
| 282 Hereditary              | NA | NA | NA | 980  | 1 | 979  | [Error: < 10 cases or controls] |
| 441.1 Acute vascular        | NA | NA | NA | 915  | 1 | 914  | [Error: < 10 cases or controls] |
| 300.13 Phobia               | NA | NA | NA | 683  | 1 | 682  | [Error: < 10 cases or controls] |
| 646 Other connective tissue | NA | NA | NA | 1101 | 1 | 1100 | [Error: < 10 cases or controls] |
| 38.1 Gram negative          | NA | NA | NA | 1054 | 1 | 1053 | [Error: < 10 cases or controls] |
| 315.2 Speech and hearing    | NA | NA | NA | 1089 | 1 | 1088 | [Error: < 10 cases or controls] |
| 840.1 Muscle/tenosynovium   | NA | NA | NA | 898  | 1 | 897  | [Error: < 10 cases or controls] |
| 452.8 Postphlebitic         | NA | NA | NA | 862  | 1 | 861  | [Error: < 10 cases or controls] |
| 696.3 Pityriasis            | NA | NA | NA | 888  | 1 | 887  | [Error: < 10 cases or controls] |
| 875 Non-healing             | NA | NA | NA | 1006 | 1 | 1005 | [Error: < 10 cases or controls] |
| 204.1 Lymphoid leukemia     | NA | NA | NA | 1090 | 1 | 1089 | [Error: < 10 cases or controls] |
| 522 Diseases of the eye     | NA | NA | NA | 1008 | 1 | 1007 | [Error: < 10 cases or controls] |
| 635 Hemorrhage              | NA | NA | NA | 1092 | 1 | 1091 | [Error: < 10 cases or controls] |
| 800.2 Fracture of the hip   | NA | NA | NA | 955  | 1 | 954  | [Error: < 10 cases or controls] |
| 642.1 Preeclampsia          | NA | NA | NA | 1098 | 1 | 1097 | [Error: < 10 cases or controls] |
| 280.2 Iron deficiency       | NA | NA | NA | 980  | 1 | 979  | [Error: < 10 cases or controls] |
| 527.8 Other specific        | NA | NA | NA | 1047 | 1 | 1046 | [Error: < 10 cases or controls] |
| 378.2 Nystagmus             | NA | NA | NA | 897  | 1 | 896  | [Error: < 10 cases or controls] |
| 379.4 Anomalies of the eye  | NA | NA | NA | 897  | 1 | 896  | [Error: < 10 cases or controls] |
| 378.5 Paralytic strabismus  | NA | NA | NA | 897  | 1 | 896  | [Error: < 10 cases or controls] |
| 635.2 Antepartum hemorrhage | NA | NA | NA | 1092 | 1 | 1091 | [Error: < 10 cases or controls] |
| 271.3 Intestinal diseases   | NA | NA | NA | 1099 | 1 | 1098 | [Error: < 10 cases or controls] |
| 578.1 Hematemesis           | NA | NA | NA | 905  | 1 | 904  | [Error: < 10 cases or controls] |
| 327.5 Parasomnias           | NA | NA | NA | 821  | 1 | 820  | [Error: < 10 cases or controls] |
| 297.2 Suicide or self-harm  | NA | NA | NA | 683  | 1 | 682  | [Error: < 10 cases or controls] |
| 209 Neuroendocrine          | NA | NA | NA | 1102 | 1 | 1101 | [Error: < 10 cases or controls] |
| 334.2 Anterior horn cell    | NA | NA | NA | 902  | 1 | 901  | [Error: < 10 cases or controls] |
| 287.2 Allergic purpura      | NA | NA | NA | 919  | 1 | 918  | [Error: < 10 cases or controls] |
| 643.1 Hyperemesis           | NA | NA | NA | 1102 | 1 | 1101 | [Error: < 10 cases or controls] |
| 526.9 Jaw disease           | NA | NA | NA | 1008 | 1 | 1007 | [Error: < 10 cases or controls] |
| 480.12 Pseudomorph          | NA | NA | NA | 838  | 1 | 837  | [Error: < 10 cases or controls] |

|                          |    |    |    |      |   |      |                                 |
|--------------------------|----|----|----|------|---|------|---------------------------------|
| 38.2 Gram positive       | NA | NA | NA | 1054 | 1 | 1053 | [Error: < 10 cases or controls] |
| 686.4 Pyogenic           | NA | NA | NA | 944  | 1 | 943  | [Error: < 10 cases or controls] |
| 509.3 Pulmonary          | NA | NA | NA | 937  | 2 | 935  | [Error: < 10 cases or controls] |
| 200.1 Polycythemia       | NA | NA | NA | 1007 | 2 | 1005 | [Error: < 10 cases or controls] |
| 585.34 Chronic Kidney    | NA | NA | NA | 984  | 2 | 982  | [Error: < 10 cases or controls] |
| 38.3 Bacteremia          | NA | NA | NA | 1055 | 2 | 1053 | [Error: < 10 cases or controls] |
| 742.2 Pathologic         | NA | NA | NA | 870  | 2 | 868  | [Error: < 10 cases or controls] |
| 560.1 Paralytic ileus    | NA | NA | NA | 776  | 2 | 774  | [Error: < 10 cases or controls] |
| 772.4 Rhabdomyolysis     | NA | NA | NA | 948  | 2 | 946  | [Error: < 10 cases or controls] |
| 513.8 Disorders of       | NA | NA | NA | 1063 | 2 | 1061 | [Error: < 10 cases or controls] |
| 994.21 Septic shock      | NA | NA | NA | 1092 | 2 | 1090 | [Error: < 10 cases or controls] |
| 41.1 Staphylococcal      | NA | NA | NA | 1055 | 2 | 1053 | [Error: < 10 cases or controls] |
| 958.2 Traumatic          | NA | NA | NA | 1100 | 2 | 1098 | [Error: < 10 cases or controls] |
| 519.2 Respiratory        | NA | NA | NA | 1043 | 2 | 1041 | [Error: < 10 cases or controls] |
| 348.7 Coma               | NA | NA | NA | 903  | 2 | 901  | [Error: < 10 cases or controls] |
| 740.12 Osteoarthritis    | NA | NA | NA | 723  | 2 | 721  | [Error: < 10 cases or controls] |
| 457.2 Encounter for      | NA | NA | NA | 863  | 2 | 861  | [Error: < 10 cases or controls] |
| 594.2 Calculus of        | NA | NA | NA | 1051 | 2 | 1049 | [Error: < 10 cases or controls] |
| 453 Chronic verruca      | NA | NA | NA | 863  | 2 | 861  | [Error: < 10 cases or controls] |
| 567 Peritonitis          | NA | NA | NA | 970  | 2 | 968  | [Error: < 10 cases or controls] |
| 253.7 Other disorder     | NA | NA | NA | 956  | 2 | 954  | [Error: < 10 cases or controls] |
| 327.72 Sleep related     | NA | NA | NA | 822  | 2 | 820  | [Error: < 10 cases or controls] |
| 580.4 Renal sclerosis    | NA | NA | NA | 984  | 2 | 982  | [Error: < 10 cases or controls] |
| 446.4 Wegener's          | NA | NA | NA | 916  | 2 | 914  | [Error: < 10 cases or controls] |
| 686.1 Carbuncle          | NA | NA | NA | 945  | 2 | 943  | [Error: < 10 cases or controls] |
| 279.11 Deficiency of     | NA | NA | NA | 998  | 2 | 996  | [Error: < 10 cases or controls] |
| 315.3 Mental retardation | NA | NA | NA | 1090 | 2 | 1088 | [Error: < 10 cases or controls] |
| 249 Secondary            | NA | NA | NA | 811  | 2 | 809  | [Error: < 10 cases or controls] |
| 579.2 Splenomegaly       | NA | NA | NA | 906  | 2 | 904  | [Error: < 10 cases or controls] |
| 411.9 Other acute        | NA | NA | NA | 691  | 2 | 689  | [Error: < 10 cases or controls] |
| 381.9 Otorrhea           | NA | NA | NA | 920  | 2 | 918  | [Error: < 10 cases or controls] |
| 800.4 Fracture of        | NA | NA | NA | 956  | 2 | 954  | [Error: < 10 cases or controls] |
| 588.2 Secondary          | NA | NA | NA | 984  | 2 | 982  | [Error: < 10 cases or controls] |

|                      |    |    |    |      |   |                                      |
|----------------------|----|----|----|------|---|--------------------------------------|
| 695.81 Erythema n    | NA | NA | NA | 889  | 2 | 887 [Error: < 10 cases or controls]  |
| 705.1 Dyshidrosis    | NA | NA | NA | 949  | 2 | 947 [Error: < 10 cases or controls]  |
| 444.2 Embolism a     | NA | NA | NA | 916  | 2 | 914 [Error: < 10 cases or controls]  |
| 575.7 Other disor    | NA | NA | NA | 1046 | 2 | 1044 [Error: < 10 cases or controls] |
| 728.71 Contractur    | NA | NA | NA | 694  | 2 | 692 [Error: < 10 cases or controls]  |
| 346.3 Nonspecific    | NA | NA | NA | 903  | 2 | 901 [Error: < 10 cases or controls]  |
| 317.11 Alcoholic liv | NA | NA | NA | 981  | 2 | 979 [Error: < 10 cases or controls]  |
| 376 Disorders o      | NA | NA | NA | 898  | 2 | 896 [Error: < 10 cases or controls]  |
| 818.2 Subarachnc     | NA | NA | NA | 1076 | 2 | 1074 [Error: < 10 cases or controls] |
| 758.1 Chromoson      | NA | NA | NA | 1087 | 2 | 1085 [Error: < 10 cases or controls] |
| 194 Cancer of o      | NA | NA | NA | 1059 | 2 | 1057 [Error: < 10 cases or controls] |
| 599.6 Oliguria anc   | NA | NA | NA | 773  | 2 | 771 [Error: < 10 cases or controls]  |
| 430.3 Subdural h     | NA | NA | NA | 882  | 2 | 880 [Error: < 10 cases or controls]  |
| 655.1 Abnormalit     | NA | NA | NA | 1098 | 2 | 1096 [Error: < 10 cases or controls] |
| 530.6 Diverticulur   | NA | NA | NA | 693  | 2 | 691 [Error: < 10 cases or controls]  |
| 221 Benign neo       | NA | NA | NA | 891  | 2 | 889 [Error: < 10 cases or controls]  |
| 589 Abnormal r       | NA | NA | NA | 984  | 2 | 982 [Error: < 10 cases or controls]  |
| 150 Cancer of e      | NA | NA | NA | 1050 | 2 | 1048 [Error: < 10 cases or controls] |
| 577.2 Chronic par    | NA | NA | NA | 1093 | 2 | 1091 [Error: < 10 cases or controls] |
| 270.33 Amyloidosi:   | NA | NA | NA | 1071 | 2 | 1069 [Error: < 10 cases or controls] |
| 295.1 Schizophre     | NA | NA | NA | 684  | 2 | 682 [Error: < 10 cases or controls]  |
| 711 Arthropath       | NA | NA | NA | 916  | 2 | 914 [Error: < 10 cases or controls]  |
| 739 Contractur       | NA | NA | NA | 932  | 2 | 930 [Error: < 10 cases or controls]  |
| 281.13 Folate-defic  | NA | NA | NA | 981  | 2 | 979 [Error: < 10 cases or controls]  |
| 535.1 Acute gastr    | NA | NA | NA | 978  | 2 | 976 [Error: < 10 cases or controls]  |
| 272.9 Unspecifec     | NA | NA | NA | 392  | 2 | 390 [Error: < 10 cases or controls]  |
| 687 Symptoms :       | NA | NA | NA | 788  | 2 | 786 [Error: < 10 cases or controls]  |
| 199.4 Neurofibro     | NA | NA | NA | 968  | 2 | 966 [Error: < 10 cases or controls]  |
| 362.5 Toxic macu     | NA | NA | NA | 954  | 2 | 952 [Error: < 10 cases or controls]  |
| 285.21 Anemia in c   | NA | NA | NA | 981  | 2 | 979 [Error: < 10 cases or controls]  |
| 285.2 Anemia of c    | NA | NA | NA | 981  | 2 | 979 [Error: < 10 cases or controls]  |
| 110.12 Athlete's fo  | NA | NA | NA | 967  | 2 | 965 [Error: < 10 cases or controls]  |
| 965.1 Opiates anc    | NA | NA | NA | 984  | 2 | 982 [Error: < 10 cases or controls]  |

|                        |    |    |    |      |   |                                      |
|------------------------|----|----|----|------|---|--------------------------------------|
| 366.1 Nonsenile C NA   | NA | NA | NA | 896  | 2 | 894 [Error: < 10 cases or controls]  |
| 573.5 Jaundice (n NA   | NA | NA | NA | 924  | 2 | 922 [Error: < 10 cases or controls]  |
| 535.6 Duodenitis NA    | NA | NA | NA | 978  | 2 | 976 [Error: < 10 cases or controls]  |
| 795.82 Elevated ca NA  | NA | NA | NA | 1096 | 2 | 1094 [Error: < 10 cases or controls] |
| 694.1 Vitiligo NA      | NA | NA | NA | 889  | 2 | 887 [Error: < 10 cases or controls]  |
| 223 Benign neo NA      | NA | NA | NA | 744  | 2 | 742 [Error: < 10 cases or controls]  |
| 526.42 Arthralgia/; NA | NA | NA | NA | 1009 | 2 | 1007 [Error: < 10 cases or controls] |
| 79.1 Varicella int NA  | NA | NA | NA | 913  | 2 | 911 [Error: < 10 cases or controls]  |
| 333.8 Other dege NA    | NA | NA | NA | 903  | 2 | 901 [Error: < 10 cases or controls]  |
| 316.1 Polyneurop NA    | NA | NA | NA | 981  | 2 | 979 [Error: < 10 cases or controls]  |
| 360 Disorders o NA     | NA | NA | NA | 957  | 2 | 955 [Error: < 10 cases or controls]  |
| 305.2 Eating disoi NA  | NA | NA | NA | 684  | 2 | 682 [Error: < 10 cases or controls]  |
| 750.1 Upper gastı NA   | NA | NA | NA | 1085 | 2 | 1083 [Error: < 10 cases or controls] |
| 277.4 Disorders o NA   | NA | NA | NA | 1066 | 2 | 1064 [Error: < 10 cases or controls] |
| 347 Cataplexy a NA     | NA | NA | NA | 903  | 2 | 901 [Error: < 10 cases or controls]  |
| 250.15 Diabetes ty NA  | NA | NA | NA | 811  | 2 | 809 [Error: < 10 cases or controls]  |
| 961 Poisoning b NA     | NA | NA | NA | 984  | 2 | 982 [Error: < 10 cases or controls]  |
| 365.5 Pseudoexfc NA    | NA | NA | NA | 957  | 2 | 955 [Error: < 10 cases or controls]  |
| 293 Symptoms i NA      | NA | NA | NA | 1038 | 2 | 1036 [Error: < 10 cases or controls] |
| 961.1 Poisoning/a NA   | NA | NA | NA | 984  | 2 | 982 [Error: < 10 cases or controls]  |
| 155 Cancer of li NA    | NA | NA | NA | 1050 | 2 | 1048 [Error: < 10 cases or controls] |
| 244.3 Iodine hypc NA   | NA | NA | NA | 732  | 2 | 730 [Error: < 10 cases or controls]  |
| 288.3 Eosinophili; NA  | NA | NA | NA | 969  | 2 | 967 [Error: < 10 cases or controls]  |
| 204 Leukemia NA        | NA | NA | NA | 1091 | 2 | 1089 [Error: < 10 cases or controls] |
| 323.8 Encephaliti; NA  | NA | NA | NA | 1095 | 2 | 1093 [Error: < 10 cases or controls] |
| 290.12 Dementia v NA   | NA | NA | NA | 946  | 2 | 944 [Error: < 10 cases or controls]  |
| 647 Infectious a NA    | NA | NA | NA | 1102 | 2 | 1100 [Error: < 10 cases or controls] |
| 620 Dysplasia o NA     | NA | NA | NA | 1061 | 2 | 1059 [Error: < 10 cases or controls] |
| 520 Disorders o NA     | NA | NA | NA | 1009 | 2 | 1007 [Error: < 10 cases or controls] |
| 291.4 Specific nor NA  | NA | NA | NA | 946  | 2 | 944 [Error: < 10 cases or controls]  |
| 158 Neoplasm c NA      | NA | NA | NA | 1050 | 2 | 1048 [Error: < 10 cases or controls] |
| 634 Miscarriage NA     | NA | NA | NA | 1093 | 2 | 1091 [Error: < 10 cases or controls] |
| 598.4 Other cells NA   | NA | NA | NA | 1097 | 2 | 1095 [Error: < 10 cases or controls] |

|        |               |    |    |    |      |   |      |                                 |
|--------|---------------|----|----|----|------|---|------|---------------------------------|
| 598    | Abnormal f    | NA | NA | NA | 1097 | 2 | 1095 | [Error: < 10 cases or controls] |
| 149    | Cancer of l   | NA | NA | NA | 1089 | 2 | 1087 | [Error: < 10 cases or controls] |
| 149.4  | Cancer of l   | NA | NA | NA | 1089 | 2 | 1087 | [Error: < 10 cases or controls] |
| 286.1  | Congenital    | NA | NA | NA | 920  | 2 | 918  | [Error: < 10 cases or controls] |
| 212    | Benign neo    | NA | NA | NA | 1100 | 2 | 1098 | [Error: < 10 cases or controls] |
| 962    | Poisoning b   | NA | NA | NA | 984  | 2 | 982  | [Error: < 10 cases or controls] |
| 368.91 | Psychophys    | NA | NA | NA | 1004 | 2 | 1002 | [Error: < 10 cases or controls] |
| 681.6  | Cellulitis an | NA | NA | NA | 945  | 2 | 943  | [Error: < 10 cases or controls] |
| 442.8  | Aneurysm c    | NA | NA | NA | 916  | 2 | 914  | [Error: < 10 cases or controls] |
| 803.3  | Fracture of   | NA | NA | NA | 956  | 2 | 954  | [Error: < 10 cases or controls] |
| 110.2  | Dermatom      | NA | NA | NA | 967  | 2 | 965  | [Error: < 10 cases or controls] |
| 379.5  | Disorders o   | NA | NA | NA | 898  | 2 | 896  | [Error: < 10 cases or controls] |
| 159    | Malignant r   | NA | NA | NA | 1050 | 2 | 1048 | [Error: < 10 cases or controls] |
| 10     | Tuberculosi   | NA | NA | NA | 1055 | 2 | 1053 | [Error: < 10 cases or controls] |
| 385.5  | Tympanosc     | NA | NA | NA | 920  | 2 | 918  | [Error: < 10 cases or controls] |
| 385    | Other disor   | NA | NA | NA | 920  | 2 | 918  | [Error: < 10 cases or controls] |
| 580.11 | Proliferativ  | NA | NA | NA | 984  | 2 | 982  | [Error: < 10 cases or controls] |
| 530.5  | Disorders o   | NA | NA | NA | 693  | 2 | 691  | [Error: < 10 cases or controls] |
| 300.8  | Acute react   | NA | NA | NA | 684  | 2 | 682  | [Error: < 10 cases or controls] |
| 145    | Cancer of r   | NA | NA | NA | 1089 | 2 | 1087 | [Error: < 10 cases or controls] |
| 259.2  | Carcinoid s   | NA | NA | NA | 956  | 2 | 954  | [Error: < 10 cases or controls] |
| 756.3  | Congenital    | NA | NA | NA | 1075 | 2 | 1073 | [Error: < 10 cases or controls] |
| 289.9  | Abnormalit    | NA | NA | NA | 969  | 2 | 967  | [Error: < 10 cases or controls] |
| 320    | Meningitis    | NA | NA | NA | 1095 | 2 | 1093 | [Error: < 10 cases or controls] |
| 713    | Arthropath    | NA | NA | NA | 916  | 2 | 914  | [Error: < 10 cases or controls] |
| 759.1  | Anomalies r   | NA | NA | NA | 1087 | 2 | 1085 | [Error: < 10 cases or controls] |
| 741.1  | Ankylosis o   | NA | NA | NA | 870  | 2 | 868  | [Error: < 10 cases or controls] |
| 375.2  | Epiphora      | NA | NA | NA | 898  | 2 | 896  | [Error: < 10 cases or controls] |
| 153.3  | Malignant r   | NA | NA | NA | 895  | 2 | 893  | [Error: < 10 cases or controls] |
| 742.8  | Articular ca  | NA | NA | NA | 870  | 2 | 868  | [Error: < 10 cases or controls] |
| 732    | Osteochon     | NA | NA | NA | 902  | 2 | 900  | [Error: < 10 cases or controls] |
| 636.8  | Cervical inc  | NA | NA | NA | 1093 | 2 | 1091 | [Error: < 10 cases or controls] |
| 31     | Diseases du   | NA | NA | NA | 1055 | 2 | 1053 | [Error: < 10 cases or controls] |



|                        |    |    |    |      |   |                                      |
|------------------------|----|----|----|------|---|--------------------------------------|
| 649.1 Diabetes or NA   | NA | NA | NA | 1095 | 2 | 1093 [Error: < 10 cases or controls] |
| 980 Encounter f NA     | NA | NA | NA | 1096 | 2 | 1094 [Error: < 10 cases or controls] |
| 495.11 Chronic ob NA   | NA | NA | NA | 857  | 3 | 854 [Error: < 10 cases or controls]  |
| 198.3 Secondary i NA   | NA | NA | NA | 969  | 3 | 966 [Error: < 10 cases or controls]  |
| 958 Certain earl NA    | NA | NA | NA | 1101 | 3 | 1098 [Error: < 10 cases or controls] |
| 170.2 Cancer of c NA   | NA | NA | NA | 1098 | 3 | 1095 [Error: < 10 cases or controls] |
| 510.2 Lung trans NA    | NA | NA | NA | 1002 | 3 | 999 [Error: < 10 cases or controls]  |
| 276.8 Polydipsia NA    | NA | NA | NA | 861  | 3 | 858 [Error: < 10 cases or controls]  |
| 555.21 Ulcerative c NA | NA | NA | NA | 777  | 3 | 774 [Error: < 10 cases or controls]  |
| 270.34 Alpha-1-ani NA  | NA | NA | NA | 1072 | 3 | 1069 [Error: < 10 cases or controls] |
| 794 Abnormal r NA      | NA | NA | NA | 1100 | 3 | 1097 [Error: < 10 cases or controls] |
| 623 Hypertroph NA      | NA | NA | NA | 1062 | 3 | 1059 [Error: < 10 cases or controls] |
| 728.2 Laxity of lig NA | NA | NA | NA | 695  | 3 | 692 [Error: < 10 cases or controls]  |
| 429.1 Heart trans NA   | NA | NA | NA | 780  | 3 | 777 [Error: < 10 cases or controls]  |
| 474.1 Acute tonsi NA   | NA | NA | NA | 673  | 3 | 670 [Error: < 10 cases or controls]  |
| 599.8 Other symp NA    | NA | NA | NA | 774  | 3 | 771 [Error: < 10 cases or controls]  |
| 580.31 Nephritis a NA  | NA | NA | NA | 985  | 3 | 982 [Error: < 10 cases or controls]  |
| 379.1 Scleritis an NA  | NA | NA | NA | 899  | 3 | 896 [Error: < 10 cases or controls]  |
| 255.1 Adrenal hy NA    | NA | NA | NA | 957  | 3 | 954 [Error: < 10 cases or controls]  |
| 447.1 Stricture of NA  | NA | NA | NA | 917  | 3 | 914 [Error: < 10 cases or controls]  |
| 797 Shock NA           | NA | NA | NA | 1101 | 3 | 1098 [Error: < 10 cases or controls] |
| 695.9 Unspecifie NA    | NA | NA | NA | 890  | 3 | 887 [Error: < 10 cases or controls]  |
| 705 Disorders o NA     | NA | NA | NA | 950  | 3 | 947 [Error: < 10 cases or controls]  |
| 911 Blister NA         | NA | NA | NA | 1102 | 3 | 1099 [Error: < 10 cases or controls] |
| 301 Personality NA     | NA | NA | NA | 685  | 3 | 682 [Error: < 10 cases or controls]  |
| 480.2 Viral pneun NA   | NA | NA | NA | 840  | 3 | 837 [Error: < 10 cases or controls]  |
| 344 Other paral NA     | NA | NA | NA | 904  | 3 | 901 [Error: < 10 cases or controls]  |
| 749 Congenital NA      | NA | NA | NA | 1099 | 3 | 1096 [Error: < 10 cases or controls] |
| 430.1 Subarachnc NA    | NA | NA | NA | 883  | 3 | 880 [Error: < 10 cases or controls]  |
| 368.1 Amblyopia NA     | NA | NA | NA | 1005 | 3 | 1002 [Error: < 10 cases or controls] |
| 289.5 Diseases of NA   | NA | NA | NA | 970  | 3 | 967 [Error: < 10 cases or controls]  |
| 588 Disorders r NA     | NA | NA | NA | 985  | 3 | 982 [Error: < 10 cases or controls]  |
| 242.3 Exophthalr NA    | NA | NA | NA | 733  | 3 | 730 [Error: < 10 cases or controls]  |

|                     |    |    |    |      |   |                                      |
|---------------------|----|----|----|------|---|--------------------------------------|
| 612.1 Galactorrhœ   | NA | NA | NA | 823  | 3 | 820 [Error: < 10 cases or controls]  |
| 619.5 Noninflamr    | NA | NA | NA | 1033 | 3 | 1030 [Error: < 10 cases or controls] |
| 383 Otosclerosi     | NA | NA | NA | 921  | 3 | 918 [Error: < 10 cases or controls]  |
| 573.4 Acute and s   | NA | NA | NA | 925  | 3 | 922 [Error: < 10 cases or controls]  |
| 769 Nonallopatl     | NA | NA | NA | 1099 | 3 | 1096 [Error: < 10 cases or controls] |
| 261.41 Rickets or c | NA | NA | NA | 833  | 3 | 830 [Error: < 10 cases or controls]  |
| 733.9 Chondromæ     | NA | NA | NA | 903  | 3 | 900 [Error: < 10 cases or controls]  |
| 474.2 Chronic ton   | NA | NA | NA | 673  | 3 | 670 [Error: < 10 cases or controls]  |
| 71 Human imn        | NA | NA | NA | 914  | 3 | 911 [Error: < 10 cases or controls]  |
| 71.1 HIV infectic   | NA | NA | NA | 914  | 3 | 911 [Error: < 10 cases or controls]  |
| 448 Disease of c    | NA | NA | NA | 917  | 3 | 914 [Error: < 10 cases or controls]  |
| 729.3 Panniculitis  | NA | NA | NA | 695  | 3 | 692 [Error: < 10 cases or controls]  |
| 756 Other cong      | NA | NA | NA | 1076 | 3 | 1073 [Error: < 10 cases or controls] |
| 287.3 Thrombocy     | NA | NA | NA | 921  | 3 | 918 [Error: < 10 cases or controls]  |
| 535.9 Gastritis an  | NA | NA | NA | 979  | 3 | 976 [Error: < 10 cases or controls]  |
| 701.6 Acquired ac   | NA | NA | NA | 956  | 3 | 953 [Error: < 10 cases or controls]  |
| 172.3 Carcinoma     | NA | NA | NA | 868  | 3 | 865 [Error: < 10 cases or controls]  |
| 626.4 Premenstru    | NA | NA | NA | 666  | 3 | 663 [Error: < 10 cases or controls]  |
| 529 Diseases an     | NA | NA | NA | 1049 | 3 | 1046 [Error: < 10 cases or controls] |
| 353.1 Nerve plexu   | NA | NA | NA | 922  | 3 | 919 [Error: < 10 cases or controls]  |
| 743.21 Pathologic i | NA | NA | NA | 723  | 3 | 720 [Error: < 10 cases or controls]  |
| 446.5 Giant cell a  | NA | NA | NA | 917  | 3 | 914 [Error: < 10 cases or controls]  |
| 394.4 Acute rheu    | NA | NA | NA | 763  | 3 | 760 [Error: < 10 cases or controls]  |
| 590 Pyelonephr      | NA | NA | NA | 753  | 3 | 750 [Error: < 10 cases or controls]  |
| 334.1 Spinocereb    | NA | NA | NA | 904  | 3 | 901 [Error: < 10 cases or controls]  |
| 443.8 Other speci   | NA | NA | NA | 917  | 3 | 914 [Error: < 10 cases or controls]  |
| 594.8 Renal colic   | NA | NA | NA | 1052 | 3 | 1049 [Error: < 10 cases or controls] |
| 411.41 Aneurysm æ   | NA | NA | NA | 692  | 3 | 689 [Error: < 10 cases or controls]  |
| 715.3 Spinal enth   | NA | NA | NA | 928  | 3 | 925 [Error: < 10 cases or controls]  |
| 710.1 Osteomyeli    | NA | NA | NA | 917  | 3 | 914 [Error: < 10 cases or controls]  |
| 550.1 Inguinal hei  | NA | NA | NA | 1003 | 3 | 1000 [Error: < 10 cases or controls] |
| 577.1 Acute panc    | NA | NA | NA | 1094 | 3 | 1091 [Error: < 10 cases or controls] |
| 277.5 Other disor   | NA | NA | NA | 1067 | 3 | 1064 [Error: < 10 cases or controls] |

|                      |    |    |    |      |   |                                      |
|----------------------|----|----|----|------|---|--------------------------------------|
| 300.3 Obsessive-c    | NA | NA | NA | 685  | 3 | 682 [Error: < 10 cases or controls]  |
| 394.3 Aortic valve   | NA | NA | NA | 763  | 3 | 760 [Error: < 10 cases or controls]  |
| 592.11 Acute cystit  | NA | NA | NA | 753  | 3 | 750 [Error: < 10 cases or controls]  |
| 691.3 Congenital     | NA | NA | NA | 890  | 3 | 887 [Error: < 10 cases or controls]  |
| 642 Hypertensio      | NA | NA | NA | 1100 | 3 | 1097 [Error: < 10 cases or controls] |
| 346.2 Nonspecific    | NA | NA | NA | 904  | 3 | 901 [Error: < 10 cases or controls]  |
| 346 Abnormal f       | NA | NA | NA | 904  | 3 | 901 [Error: < 10 cases or controls]  |
| 380 Disorders o      | NA | NA | NA | 1009 | 3 | 1006 [Error: < 10 cases or controls] |
| 795.8 Abnormal t     | NA | NA | NA | 1097 | 3 | 1094 [Error: < 10 cases or controls] |
| 704.12 Telogen eff   | NA | NA | NA | 1004 | 3 | 1001 [Error: < 10 cases or controls] |
| 803.21 Colles' fract | NA | NA | NA | 957  | 3 | 954 [Error: < 10 cases or controls]  |
| 274.11 Gouty arthr   | NA | NA | NA | 1066 | 3 | 1063 [Error: < 10 cases or controls] |
| 704.11 Alopecia Ar   | NA | NA | NA | 1004 | 3 | 1001 [Error: < 10 cases or controls] |
| 202 Cancer of o      | NA | NA | NA | 1092 | 3 | 1089 [Error: < 10 cases or controls] |
| 364.1 Corneal op;    | NA | NA | NA | 958  | 3 | 955 [Error: < 10 cases or controls]  |
| 290.16 Vascular de   | NA | NA | NA | 947  | 3 | 944 [Error: < 10 cases or controls]  |
| 723.1 Torticollis    | NA | NA | NA | 800  | 3 | 797 [Error: < 10 cases or controls]  |
| 960.2 Allergy/adv    | NA | NA | NA | 985  | 3 | 982 [Error: < 10 cases or controls]  |
| 626.8 Infertility, f | NA | NA | NA | 666  | 3 | 663 [Error: < 10 cases or controls]  |
| 433.11 Occlusion o   | NA | NA | NA | 883  | 3 | 880 [Error: < 10 cases or controls]  |
| 184.1 Malignant r    | NA | NA | NA | 985  | 3 | 982 [Error: < 10 cases or controls]  |
| 184 Cancer of o      | NA | NA | NA | 985  | 3 | 982 [Error: < 10 cases or controls]  |
| 184.11 Malignant r   | NA | NA | NA | 985  | 3 | 982 [Error: < 10 cases or controls]  |
| 362.9 Retinal ede    | NA | NA | NA | 955  | 3 | 952 [Error: < 10 cases or controls]  |
| 426.22 Mobitz II A\  | NA | NA | NA | 420  | 3 | 417 [Error: < 10 cases or controls]  |
| 528.12 Oral aphth;   | NA | NA | NA | 1049 | 3 | 1046 [Error: < 10 cases or controls] |
| 215 Other beniç      | NA | NA | NA | 1060 | 3 | 1057 [Error: < 10 cases or controls] |
| 743.4 Stress fract   | NA | NA | NA | 723  | 3 | 720 [Error: < 10 cases or controls]  |
| 580.1 Glomerulor     | NA | NA | NA | 985  | 3 | 982 [Error: < 10 cases or controls]  |
| 339 Other head       | NA | NA | NA | 970  | 3 | 967 [Error: < 10 cases or controls]  |
| 527.2 Sialoadeniti   | NA | NA | NA | 1049 | 3 | 1046 [Error: < 10 cases or controls] |
| 636 Early or thr     | NA | NA | NA | 1094 | 3 | 1091 [Error: < 10 cases or controls] |
| 592.12 Chronic cys   | NA | NA | NA | 753  | 3 | 750 [Error: < 10 cases or controls]  |

|                       |    |    |    |      |   |                                      |
|-----------------------|----|----|----|------|---|--------------------------------------|
| 577.3 Cyst and ps NA  | NA | NA | NA | 1094 | 3 | 1091 [Error: < 10 cases or controls] |
| 653 Problems a NA     | NA | NA | NA | 1100 | 3 | 1097 [Error: < 10 cases or controls] |
| 198.5 Secondary i NA  | NA | NA | NA | 970  | 4 | 966 [Error: < 10 cases or controls]  |
| 707.1 Decubitus t NA  | NA | NA | NA | 1081 | 4 | 1077 [Error: < 10 cases or controls] |
| 198.7 Secondary i NA  | NA | NA | NA | 970  | 4 | 966 [Error: < 10 cases or controls]  |
| 288.11 Neutropeni NA  | NA | NA | NA | 971  | 4 | 967 [Error: < 10 cases or controls]  |
| 81 Infection/ir NA    | NA | NA | NA | 1095 | 4 | 1091 [Error: < 10 cases or controls] |
| 315 Develomen NA      | NA | NA | NA | 1092 | 4 | 1088 [Error: < 10 cases or controls] |
| 509.8 Dependenc NA    | NA | NA | NA | 939  | 4 | 935 [Error: < 10 cases or controls]  |
| 994.1 Systemic in NA  | NA | NA | NA | 1094 | 4 | 1090 [Error: < 10 cases or controls] |
| 170 Cancer of b NA    | NA | NA | NA | 1099 | 4 | 1095 [Error: < 10 cases or controls] |
| 555.2 Ulcerative c NA | NA | NA | NA | 778  | 4 | 774 [Error: < 10 cases or controls]  |
| 772.1 Muscular w NA   | NA | NA | NA | 950  | 4 | 946 [Error: < 10 cases or controls]  |
| 426.4 Anomalous NA    | NA | NA | NA | 421  | 4 | 417 [Error: < 10 cases or controls]  |
| 286.9 Abnormal c NA   | NA | NA | NA | 922  | 4 | 918 [Error: < 10 cases or controls]  |
| 41.8 H. pylori NA     | NA | NA | NA | 1057 | 4 | 1053 [Error: < 10 cases or controls] |
| 621 Endometriæ NA     | NA | NA | NA | 1063 | 4 | 1059 [Error: < 10 cases or controls] |
| 686.2 Impetigo NA     | NA | NA | NA | 947  | 4 | 943 [Error: < 10 cases or controls]  |
| 836 Traumatic e NA    | NA | NA | NA | 1003 | 4 | 999 [Error: < 10 cases or controls]  |
| 580.3 Nephritis a1 NA | NA | NA | NA | 986  | 4 | 982 [Error: < 10 cases or controls]  |
| 619.3 Noninflamr NA   | NA | NA | NA | 1034 | 4 | 1030 [Error: < 10 cases or controls] |
| 513.4 Hyperventil NA  | NA | NA | NA | 1065 | 4 | 1061 [Error: < 10 cases or controls] |
| 859 Complicatic NA    | NA | NA | NA | 1043 | 4 | 1039 [Error: < 10 cases or controls] |
| 473.3 Paralysis/sç NA | NA | NA | NA | 674  | 4 | 670 [Error: < 10 cases or controls]  |
| 695.41 Cutaneous NA   | NA | NA | NA | 878  | 4 | 874 [Error: < 10 cases or controls]  |
| 8.6 Viral Enteri NA   | NA | NA | NA | 1075 | 4 | 1071 [Error: < 10 cases or controls] |
| 758 Chromoson NA      | NA | NA | NA | 1089 | 4 | 1085 [Error: < 10 cases or controls] |
| 755.1 Congenital NA   | NA | NA | NA | 1077 | 4 | 1073 [Error: < 10 cases or controls] |
| 446.9 Arteritis NC NA | NA | NA | NA | 918  | 4 | 914 [Error: < 10 cases or controls]  |
| 571.6 Primary bili NA | NA | NA | NA | 926  | 4 | 922 [Error: < 10 cases or controls]  |
| 733.2 Cyst of bon NA  | NA | NA | NA | 904  | 4 | 900 [Error: < 10 cases or controls]  |
| 619.1 Noninflamr NA   | NA | NA | NA | 1034 | 4 | 1030 [Error: < 10 cases or controls] |
| 752 Nervous sy: NA    | NA | NA | NA | 1088 | 4 | 1084 [Error: < 10 cases or controls] |

|                     |    |    |    |      |   |                                      |
|---------------------|----|----|----|------|---|--------------------------------------|
| 752.2 Other speci   | NA | NA | NA | 1088 | 4 | 1084 [Error: < 10 cases or controls] |
| 736.6 Unequal leg   | NA | NA | NA | 934  | 4 | 930 [Error: < 10 cases or controls]  |
| 278.3 Localized ac  | NA | NA | NA | 835  | 4 | 831 [Error: < 10 cases or controls]  |
| 818.1 Subdural he   | NA | NA | NA | 1078 | 4 | 1074 [Error: < 10 cases or controls] |
| 550.4 Umbilical h   | NA | NA | NA | 1004 | 4 | 1000 [Error: < 10 cases or controls] |
| 364.51 Fuchs' dyst  | NA | NA | NA | 959  | 4 | 955 [Error: < 10 cases or controls]  |
| 117.1 Histoplasma   | NA | NA | NA | 969  | 4 | 965 [Error: < 10 cases or controls]  |
| 624 Symptoms i      | NA | NA | NA | 981  | 4 | 977 [Error: < 10 cases or controls]  |
| 253.4 Anterior pit  | NA | NA | NA | 958  | 4 | 954 [Error: < 10 cases or controls]  |
| 504.1 Idiopathic f  | NA | NA | NA | 939  | 4 | 935 [Error: < 10 cases or controls]  |
| 370.1 Corneal ulc   | NA | NA | NA | 882  | 4 | 878 [Error: < 10 cases or controls]  |
| 323 Encephaliti     | NA | NA | NA | 1097 | 4 | 1093 [Error: < 10 cases or controls] |
| 136 Other infec     | NA | NA | NA | 1093 | 4 | 1089 [Error: < 10 cases or controls] |
| 465.4 Acute laryn   | NA | NA | NA | 709  | 4 | 705 [Error: < 10 cases or controls]  |
| 697 Sarcoidosis     | NA | NA | NA | 891  | 4 | 887 [Error: < 10 cases or controls]  |
| 526.41 Temporom     | NA | NA | NA | 1011 | 4 | 1007 [Error: < 10 cases or controls] |
| 870.5 Open woun     | NA | NA | NA | 1009 | 4 | 1005 [Error: < 10 cases or controls] |
| 378.1 Strabismus    | NA | NA | NA | 900  | 4 | 896 [Error: < 10 cases or controls]  |
| 696.42 Psoriatic ar | NA | NA | NA | 851  | 4 | 847 [Error: < 10 cases or controls]  |
| 977 Personal hi     | NA | NA | NA | 986  | 4 | 982 [Error: < 10 cases or controls]  |
| 704.8 Other speci   | NA | NA | NA | 1005 | 4 | 1001 [Error: < 10 cases or controls] |
| 747.2 Congenital    | NA | NA | NA | 1033 | 4 | 1029 [Error: < 10 cases or controls] |
| 227.1 Benign neo    | NA | NA | NA | 1061 | 4 | 1057 [Error: < 10 cases or controls] |
| 610.8 Other speci   | NA | NA | NA | 824  | 4 | 820 [Error: < 10 cases or controls]  |
| 655 Known or s      | NA | NA | NA | 1100 | 4 | 1096 [Error: < 10 cases or controls] |
| 70.4 Chronic heç    | NA | NA | NA | 915  | 4 | 911 [Error: < 10 cases or controls]  |
| 275.3 Disorders o   | NA | NA | NA | 1025 | 4 | 1021 [Error: < 10 cases or controls] |
| 362.31 Separation   | NA | NA | NA | 956  | 4 | 952 [Error: < 10 cases or controls]  |
| 722.8 Postlamine    | NA | NA | NA | 801  | 4 | 797 [Error: < 10 cases or controls]  |
| 514.1 Abnormal r    | NA | NA | NA | 1035 | 4 | 1031 [Error: < 10 cases or controls] |
| 374.1 Ectropion o   | NA | NA | NA | 882  | 4 | 878 [Error: < 10 cases or controls]  |
| 523.3 Periodontit   | NA | NA | NA | 1011 | 4 | 1007 [Error: < 10 cases or controls] |
| 523.31 Acute peric  | NA | NA | NA | 1011 | 4 | 1007 [Error: < 10 cases or controls] |

|        |              |    |    |    |      |   |      |                                 |
|--------|--------------|----|----|----|------|---|------|---------------------------------|
| 350.6  | Disturbanc   | NA | NA | NA | 1006 | 4 | 1002 | [Error: < 10 cases or controls] |
| 931    | Contact der  | NA | NA | NA | 870  | 4 | 866  | [Error: < 10 cases or controls] |
| 292.5  | Transient al | NA | NA | NA | 948  | 4 | 944  | [Error: < 10 cases or controls] |
| 420.21 | Acute peric  | NA | NA | NA | 980  | 4 | 976  | [Error: < 10 cases or controls] |
| 800.1  | Fracture of  | NA | NA | NA | 958  | 4 | 954  | [Error: < 10 cases or controls] |
| 425.12 | Other hype   | NA | NA | NA | 980  | 4 | 976  | [Error: < 10 cases or controls] |
| 701.3  | Circumscrit  | NA | NA | NA | 957  | 4 | 953  | [Error: < 10 cases or controls] |
| 54     | Herpes sim   | NA | NA | NA | 915  | 4 | 911  | [Error: < 10 cases or controls] |
| 270.32 | Paraproteir  | NA | NA | NA | 1073 | 4 | 1069 | [Error: < 10 cases or controls] |
| 717    | Polymyalgi   | NA | NA | NA | 1097 | 4 | 1093 | [Error: < 10 cases or controls] |
| 586.4  | Stricture/ol | NA | NA | NA | 986  | 4 | 982  | [Error: < 10 cases or controls] |
| 200    | Myeloprolif  | NA | NA | NA | 1094 | 5 | 1089 | [Error: < 10 cases or controls] |
| 191.11 | Cancer of b  | NA | NA | NA | 1078 | 5 | 1073 | [Error: < 10 cases or controls] |
| 191.1  | Cancer of b  | NA | NA | NA | 1078 | 5 | 1073 | [Error: < 10 cases or controls] |
| 430.2  | Intracerebr  | NA | NA | NA | 885  | 5 | 880  | [Error: < 10 cases or controls] |
| 362.22 | Macular de   | NA | NA | NA | 957  | 5 | 952  | [Error: < 10 cases or controls] |
| 289.8  | Polycyther   | NA | NA | NA | 968  | 5 | 963  | [Error: < 10 cases or controls] |
| 331.1  | Hydroceph    | NA | NA | NA | 906  | 5 | 901  | [Error: < 10 cases or controls] |
| 727.7  | Contractur   | NA | NA | NA | 697  | 5 | 692  | [Error: < 10 cases or controls] |
| 420.1  | Myocarditi   | NA | NA | NA | 981  | 5 | 976  | [Error: < 10 cases or controls] |
| 818    | Intracranial | NA | NA | NA | 1079 | 5 | 1074 | [Error: < 10 cases or controls] |
| 707.3  | Chronic ulc  | NA | NA | NA | 1082 | 5 | 1077 | [Error: < 10 cases or controls] |
| 110.13 | Dermatoph    | NA | NA | NA | 970  | 5 | 965  | [Error: < 10 cases or controls] |
| 556.1  | Ulceration   | NA | NA | NA | 779  | 5 | 774  | [Error: < 10 cases or controls] |
| 112.3  | Candidiasis  | NA | NA | NA | 970  | 5 | 965  | [Error: < 10 cases or controls] |
| 585.2  | Renal failur | NA | NA | NA | 987  | 5 | 982  | [Error: < 10 cases or controls] |
| 441    | Vascular in  | NA | NA | NA | 919  | 5 | 914  | [Error: < 10 cases or controls] |
| 724.1  | Disorders o  | NA | NA | NA | 802  | 5 | 797  | [Error: < 10 cases or controls] |
| 349    | Other and t  | NA | NA | NA | 906  | 5 | 901  | [Error: < 10 cases or controls] |
| 790.1  | Elevated se  | NA | NA | NA | 956  | 5 | 951  | [Error: < 10 cases or controls] |
| 755    | Congenital   | NA | NA | NA | 1078 | 5 | 1073 | [Error: < 10 cases or controls] |
| 504    | Other alvec  | NA | NA | NA | 940  | 5 | 935  | [Error: < 10 cases or controls] |
| 369.2  | Eye infectic | NA | NA | NA | 883  | 5 | 878  | [Error: < 10 cases or controls] |

|                     |    |    |    |      |   |                                      |
|---------------------|----|----|----|------|---|--------------------------------------|
| 425.8 Other cardi   | NA | NA | NA | 981  | 5 | 976 [Error: < 10 cases or controls]  |
| 706.8 Other speci   | NA | NA | NA | 952  | 5 | 947 [Error: < 10 cases or controls]  |
| 361.1 Retinal det   | NA | NA | NA | 960  | 5 | 955 [Error: < 10 cases or controls]  |
| 754.2 Spondylolis   | NA | NA | NA | 1078 | 5 | 1073 [Error: < 10 cases or controls] |
| 727.8 Plica syndr   | NA | NA | NA | 697  | 5 | 692 [Error: < 10 cases or controls]  |
| 781 Symptoms i      | NA | NA | NA | 1071 | 5 | 1066 [Error: < 10 cases or controls] |
| 724.2 Disorders o   | NA | NA | NA | 802  | 5 | 797 [Error: < 10 cases or controls]  |
| 724.9 Other unsp    | NA | NA | NA | 802  | 5 | 797 [Error: < 10 cases or controls]  |
| 695.7 Prurigo and   | NA | NA | NA | 892  | 5 | 887 [Error: < 10 cases or controls]  |
| 377.1 Optic atrop   | NA | NA | NA | 901  | 5 | 896 [Error: < 10 cases or controls]  |
| 153.2 Colon canc    | NA | NA | NA | 898  | 5 | 893 [Error: < 10 cases or controls]  |
| 427.41 Ventricular  | NA | NA | NA | 422  | 5 | 417 [Error: < 10 cases or controls]  |
| 701.5 Abnormal g    | NA | NA | NA | 958  | 5 | 953 [Error: < 10 cases or controls]  |
| 364.5 Corneal dys   | NA | NA | NA | 960  | 5 | 955 [Error: < 10 cases or controls]  |
| 736.2 Acquired d    | NA | NA | NA | 935  | 5 | 930 [Error: < 10 cases or controls]  |
| 709.7 Unspecifec    | NA | NA | NA | 869  | 5 | 864 [Error: < 10 cases or controls]  |
| 427.42 Cardiac arr  | NA | NA | NA | 422  | 5 | 417 [Error: < 10 cases or controls]  |
| 426.21 First degre  | NA | NA | NA | 422  | 5 | 417 [Error: < 10 cases or controls]  |
| 371.1 Uveitis, nor  | NA | NA | NA | 883  | 5 | 878 [Error: < 10 cases or controls]  |
| 362.6 Peripheral i  | NA | NA | NA | 957  | 5 | 952 [Error: < 10 cases or controls]  |
| 592.13 Chronic int  | NA | NA | NA | 755  | 5 | 750 [Error: < 10 cases or controls]  |
| 363.3 Chorioretin   | NA | NA | NA | 960  | 5 | 955 [Error: < 10 cases or controls]  |
| 224.1 Benign neo    | NA | NA | NA | 1078 | 5 | 1073 [Error: < 10 cases or controls] |
| 613.1 Inflammato    | NA | NA | NA | 975  | 5 | 970 [Error: < 10 cases or controls]  |
| 313.1 Attention d   | NA | NA | NA | 1093 | 5 | 1088 [Error: < 10 cases or controls] |
| 313 Pervasive d     | NA | NA | NA | 1093 | 5 | 1088 [Error: < 10 cases or controls] |
| 189.21 Malignant r  | NA | NA | NA | 1094 | 5 | 1089 [Error: < 10 cases or controls] |
| 189.2 Cancer of b   | NA | NA | NA | 1094 | 5 | 1089 [Error: < 10 cases or controls] |
| 332 Parkinson's     | NA | NA | NA | 906  | 5 | 901 [Error: < 10 cases or controls]  |
| 751.21 Cystic kidn  | NA | NA | NA | 1088 | 5 | 1083 [Error: < 10 cases or controls] |
| 388 Other disor     | NA | NA | NA | 914  | 5 | 909 [Error: < 10 cases or controls]  |
| 386.21 Central orig | NA | NA | NA | 800  | 5 | 795 [Error: < 10 cases or controls]  |
| 557 Intestinal rr   | NA | NA | NA | 779  | 5 | 774 [Error: < 10 cases or controls]  |

|                     |    |    |    |      |   |                                      |
|---------------------|----|----|----|------|---|--------------------------------------|
| 735.23 Hallux rigid | NA | NA | NA | 935  | 5 | 930 [Error: < 10 cases or controls]  |
| 258.1 Postablativ   | NA | NA | NA | 959  | 5 | 954 [Error: < 10 cases or controls]  |
| 781.2 Abnormal p    | NA | NA | NA | 1071 | 5 | 1066 [Error: < 10 cases or controls] |
| 189.11 Malignant r  | NA | NA | NA | 1094 | 5 | 1089 [Error: < 10 cases or controls] |
| 597.8 Urethral hy   | NA | NA | NA | 1028 | 5 | 1023 [Error: < 10 cases or controls] |
| 528.1 Stomatitis a  | NA | NA | NA | 1051 | 5 | 1046 [Error: < 10 cases or controls] |
| 302 Sexual and      | NA | NA | NA | 687  | 5 | 682 [Error: < 10 cases or controls]  |
| 302.1 Decreased l   | NA | NA | NA | 687  | 5 | 682 [Error: < 10 cases or controls]  |
| 759 Other and t     | NA | NA | NA | 1090 | 5 | 1085 [Error: < 10 cases or controls] |
| 525.1 Loss of teet  | NA | NA | NA | 1012 | 5 | 1007 [Error: < 10 cases or controls] |
| 362.8 Retinal her   | NA | NA | NA | 957  | 5 | 952 [Error: < 10 cases or controls]  |
| 275.11 Hereditary   | NA | NA | NA | 1026 | 5 | 1021 [Error: < 10 cases or controls] |
| 963 Poisoning b     | NA | NA | NA | 988  | 6 | 982 [Error: < 10 cases or controls]  |
| 963.1 Antineopla    | NA | NA | NA | 988  | 6 | 982 [Error: < 10 cases or controls]  |
| 513.3 Hypoventil    | NA | NA | NA | 1067 | 6 | 1061 [Error: < 10 cases or controls] |
| 571.81 Portal hype  | NA | NA | NA | 928  | 6 | 922 [Error: < 10 cases or controls]  |
| 530.2 Esophageal    | NA | NA | NA | 697  | 6 | 691 [Error: < 10 cases or controls]  |
| 735.1 Flat foot     | NA | NA | NA | 936  | 6 | 930 [Error: < 10 cases or controls]  |
| 803.1 Fracture of   | NA | NA | NA | 960  | 6 | 954 [Error: < 10 cases or controls]  |
| 227.3 Benign neo    | NA | NA | NA | 1063 | 6 | 1057 [Error: < 10 cases or controls] |
| 395.4 Nonrheum      | NA | NA | NA | 766  | 6 | 760 [Error: < 10 cases or controls]  |
| 474 Acute and c     | NA | NA | NA | 676  | 6 | 670 [Error: < 10 cases or controls]  |
| 242.2 Toxic multi   | NA | NA | NA | 736  | 6 | 730 [Error: < 10 cases or controls]  |
| 337.1 Peripheral    | NA | NA | NA | 907  | 6 | 901 [Error: < 10 cases or controls]  |
| 386.3 Labyrinthiti  | NA | NA | NA | 801  | 6 | 795 [Error: < 10 cases or controls]  |
| 531.2 Gastric ulce  | NA | NA | NA | 1063 | 6 | 1057 [Error: < 10 cases or controls] |
| 260.3 Adult failur  | NA | NA | NA | 836  | 6 | 830 [Error: < 10 cases or controls]  |
| 345.11 Generalizec  | NA | NA | NA | 907  | 6 | 901 [Error: < 10 cases or controls]  |
| 250.7 Diabetic ret  | NA | NA | NA | 958  | 6 | 952 [Error: < 10 cases or controls]  |
| 556 Ulceration      | NA | NA | NA | 780  | 6 | 774 [Error: < 10 cases or controls]  |
| 287 Purpura an      | NA | NA | NA | 924  | 6 | 918 [Error: < 10 cases or controls]  |
| 420.22 Chronic per  | NA | NA | NA | 982  | 6 | 976 [Error: < 10 cases or controls]  |
| 575.8 Other disor   | NA | NA | NA | 1050 | 6 | 1044 [Error: < 10 cases or controls] |



|                    |    |    |    |      |   |                                      |
|--------------------|----|----|----|------|---|--------------------------------------|
| 709.3 Systemic sc  | NA | NA | NA | 870  | 6 | 864 [Error: < 10 cases or controls]  |
| 174.3 Neoplasm c   | NA | NA | NA | 919  | 6 | 913 [Error: < 10 cases or controls]  |
| 754 Congenital     | NA | NA | NA | 1079 | 6 | 1073 [Error: < 10 cases or controls] |
| 691 Congenital     | NA | NA | NA | 893  | 6 | 887 [Error: < 10 cases or controls]  |
| 587 Kidney repl    | NA | NA | NA | 988  | 6 | 982 [Error: < 10 cases or controls]  |
| 8.52 Intestinal ir | NA | NA | NA | 1077 | 6 | 1071 [Error: < 10 cases or controls] |
| 579.8 Nonspecific  | NA | NA | NA | 910  | 6 | 904 [Error: < 10 cases or controls]  |
| 610.2 Fibroadeno   | NA | NA | NA | 826  | 6 | 820 [Error: < 10 cases or controls]  |
| 473.1 Chronic lar  | NA | NA | NA | 676  | 6 | 670 [Error: < 10 cases or controls]  |
| 733.8 Malunion a   | NA | NA | NA | 906  | 6 | 900 [Error: < 10 cases or controls]  |
| 425.11 Hypertroph  | NA | NA | NA | 982  | 6 | 976 [Error: < 10 cases or controls]  |
| 227.2 Benign neo   | NA | NA | NA | 1063 | 6 | 1057 [Error: < 10 cases or controls] |
| 619.4 Noninflamr   | NA | NA | NA | 1036 | 6 | 1030 [Error: < 10 cases or controls] |
| 117 Mycoses        | NA | NA | NA | 971  | 6 | 965 [Error: < 10 cases or controls]  |
| 722.7 Interverteb  | NA | NA | NA | 803  | 6 | 797 [Error: < 10 cases or controls]  |
| 710 Osteomyeli     | NA | NA | NA | 920  | 6 | 914 [Error: < 10 cases or controls]  |
| 726.2 Synoviopat   | NA | NA | NA | 698  | 6 | 692 [Error: < 10 cases or controls]  |
| 724.8 Other symp   | NA | NA | NA | 803  | 6 | 797 [Error: < 10 cases or controls]  |
| 614.1 Pelvic perit | NA | NA | NA | 1028 | 6 | 1022 [Error: < 10 cases or controls] |
| 649 Other cond     | NA | NA | NA | 1099 | 6 | 1093 [Error: < 10 cases or controls] |
| 153 Colorectal c   | NA | NA | NA | 899  | 6 | 893 [Error: < 10 cases or controls]  |
| 368.4 Visual field | NA | NA | NA | 1008 | 6 | 1002 [Error: < 10 cases or controls] |
| 610.3 Fibrosclero  | NA | NA | NA | 826  | 6 | 820 [Error: < 10 cases or controls]  |
| 729 Other disor    | NA | NA | NA | 698  | 6 | 692 [Error: < 10 cases or controls]  |
| 471 Nasal polyp    | NA | NA | NA | 676  | 6 | 670 [Error: < 10 cases or controls]  |
| 375 Disorders o    | NA | NA | NA | 902  | 6 | 896 [Error: < 10 cases or controls]  |
| 750.21 Congenital  | NA | NA | NA | 1089 | 6 | 1083 [Error: < 10 cases or controls] |
| 750.2 Lower gastr  | NA | NA | NA | 1089 | 6 | 1083 [Error: < 10 cases or controls] |
| 626.14 Irregular m | NA | NA | NA | 669  | 6 | 663 [Error: < 10 cases or controls]  |
| 198.4 Secondary i  | NA | NA | NA | 973  | 7 | 966 [Error: < 10 cases or controls]  |
| 289 Other disea    | NA | NA | NA | 974  | 7 | 967 [Error: < 10 cases or controls]  |
| 276.41 Acidosis    | NA | NA | NA | 865  | 7 | 858 [Error: < 10 cases or controls]  |
| 198.2 Secondary i  | NA | NA | NA | 973  | 7 | 966 [Error: < 10 cases or controls]  |

|                     |    |    |    |      |   |                                      |
|---------------------|----|----|----|------|---|--------------------------------------|
| 253.1 Pituitary hy  | NA | NA | NA | 961  | 7 | 954 [Error: < 10 cases or controls]  |
| 572 Ascites (no)    | NA | NA | NA | 929  | 7 | 922 [Error: < 10 cases or controls]  |
| 297.1 Suicidal ide  | NA | NA | NA | 689  | 7 | 682 [Error: < 10 cases or controls]  |
| 286.5 Hemorrhag     | NA | NA | NA | 925  | 7 | 918 [Error: < 10 cases or controls]  |
| 540 Appendice       | NA | NA | NA | 1102 | 7 | 1095 [Error: < 10 cases or controls] |
| 540.1 Appendiciti   | NA | NA | NA | 1102 | 7 | 1095 [Error: < 10 cases or controls] |
| 540.11 Acute appe   | NA | NA | NA | 1102 | 7 | 1095 [Error: < 10 cases or controls] |
| 695.8 Other speci   | NA | NA | NA | 894  | 7 | 887 [Error: < 10 cases or controls]  |
| 496.3 Bronchiect    | NA | NA | NA | 861  | 7 | 854 [Error: < 10 cases or controls]  |
| 256.4 Polycystic c  | NA | NA | NA | 961  | 7 | 954 [Error: < 10 cases or controls]  |
| 536.3 Gastropare    | NA | NA | NA | 983  | 7 | 976 [Error: < 10 cases or controls]  |
| 250.14 Type 1 diab  | NA | NA | NA | 816  | 7 | 809 [Error: < 10 cases or controls]  |
| 451.2 Phlebitis an  | NA | NA | NA | 868  | 7 | 861 [Error: < 10 cases or controls]  |
| 70.9 Hepatitis N    | NA | NA | NA | 918  | 7 | 911 [Error: < 10 cases or controls]  |
| 574.3 Cholecystiti  | NA | NA | NA | 1051 | 7 | 1044 [Error: < 10 cases or controls] |
| 701.4 Keloid scar   | NA | NA | NA | 960  | 7 | 953 [Error: < 10 cases or controls]  |
| 444 Arterial em     | NA | NA | NA | 921  | 7 | 914 [Error: < 10 cases or controls]  |
| 429.9 Cardiac con   | NA | NA | NA | 784  | 7 | 777 [Error: < 10 cases or controls]  |
| 250.25 Diabetes ty  | NA | NA | NA | 816  | 7 | 809 [Error: < 10 cases or controls]  |
| 255.2 Adrenal hy    | NA | NA | NA | 961  | 7 | 954 [Error: < 10 cases or controls]  |
| 255.21 Glucocortic  | NA | NA | NA | 961  | 7 | 954 [Error: < 10 cases or controls]  |
| 180.3 Cervical int  | NA | NA | NA | 916  | 7 | 909 [Error: < 10 cases or controls]  |
| 819 Skull and fa    | NA | NA | NA | 1081 | 7 | 1074 [Error: < 10 cases or controls] |
| 709.2 Sicca syndr   | NA | NA | NA | 871  | 7 | 864 [Error: < 10 cases or controls]  |
| 226 Benign neo      | NA | NA | NA | 1064 | 7 | 1057 [Error: < 10 cases or controls] |
| 378 Strabismus      | NA | NA | NA | 903  | 7 | 896 [Error: < 10 cases or controls]  |
| 530.13 Barrett's es | NA | NA | NA | 698  | 7 | 691 [Error: < 10 cases or controls]  |
| 213 Benign neo      | NA | NA | NA | 749  | 7 | 742 [Error: < 10 cases or controls]  |
| 8.5 Bacterial er    | NA | NA | NA | 1078 | 7 | 1071 [Error: < 10 cases or controls] |
| 526.4 Temporom      | NA | NA | NA | 1014 | 7 | 1007 [Error: < 10 cases or controls] |
| 224 Benign neo      | NA | NA | NA | 1080 | 7 | 1073 [Error: < 10 cases or controls] |
| 557.1 Celiac disea  | NA | NA | NA | 781  | 7 | 774 [Error: < 10 cases or controls]  |
| 292.11 Aphasia      | NA | NA | NA | 951  | 7 | 944 [Error: < 10 cases or controls]  |

|                                                          |    |    |    |      |   |                                      |
|----------------------------------------------------------|----|----|----|------|---|--------------------------------------|
| 740.3 Osteoarthritis                                     | NA | NA | NA | 728  | 7 | 721 [Error: < 10 cases or controls]  |
| 217.1 Nevus, non                                         | NA | NA | NA | 873  | 7 | 866 [Error: < 10 cases or controls]  |
| 426.31 Right bundle branch block                         | NA | NA | NA | 424  | 7 | 417 [Error: < 10 cases or controls]  |
| 333.4 Torsion dystonia                                   | NA | NA | NA | 908  | 7 | 901 [Error: < 10 cases or controls]  |
| 333.1 Essential tremor                                   | NA | NA | NA | 908  | 7 | 901 [Error: < 10 cases or controls]  |
| 972 Poisoning by barbiturates                            | NA | NA | NA | 989  | 7 | 982 [Error: < 10 cases or controls]  |
| 220 Benign neoplasm of the thyroid gland                 | NA | NA | NA | 900  | 7 | 893 [Error: < 10 cases or controls]  |
| 306 Other mental disorders                               | NA | NA | NA | 689  | 7 | 682 [Error: < 10 cases or controls]  |
| 172.22 Squamous cell carcinoma of the head and neck      | NA | NA | NA | 872  | 7 | 865 [Error: < 10 cases or controls]  |
| 477 Epistaxis or nosebleed                               | NA | NA | NA | 677  | 7 | 670 [Error: < 10 cases or controls]  |
| 531.4 Peptic ulcer disease                               | NA | NA | NA | 1064 | 7 | 1057 [Error: < 10 cases or controls] |
| 704.2 Hirsutism                                          | NA | NA | NA | 1008 | 7 | 1001 [Error: < 10 cases or controls] |
| 327.41 Organic or functional psychosis                   | NA | NA | NA | 827  | 7 | 820 [Error: < 10 cases or controls]  |
| 751.2 Congenital anomalies of the eye                    | NA | NA | NA | 1090 | 7 | 1083 [Error: < 10 cases or controls] |
| 196 Radiotherapy complications                           | NA | NA | NA | 973  | 7 | 966 [Error: < 10 cases or controls]  |
| 913 Toxic effects of drugs                               | NA | NA | NA | 1048 | 7 | 1041 [Error: < 10 cases or controls] |
| 560.4 Other intestinal diseases                          | NA | NA | NA | 781  | 7 | 774 [Error: < 10 cases or controls]  |
| 772.6 Facial weakness                                    | NA | NA | NA | 953  | 7 | 946 [Error: < 10 cases or controls]  |
| 525 Other diseases of the skin                           | NA | NA | NA | 1014 | 7 | 1007 [Error: < 10 cases or controls] |
| 750 Digestive system diseases                            | NA | NA | NA | 1090 | 7 | 1083 [Error: < 10 cases or controls] |
| 426.8 Other cardiac diseases                             | NA | NA | NA | 424  | 7 | 417 [Error: < 10 cases or controls]  |
| 276.4 Acid-base balance disorders                        | NA | NA | NA | 866  | 8 | 858 [Error: < 10 cases or controls]  |
| 858 Complications of surgery                             | NA | NA | NA | 1047 | 8 | 1039 [Error: < 10 cases or controls] |
| 41.4 E. coli infections                                  | NA | NA | NA | 1061 | 8 | 1053 [Error: < 10 cases or controls] |
| 359 Muscular dystrophies                                 | NA | NA | NA | 1001 | 8 | 993 [Error: < 10 cases or controls]  |
| 359.2 Myopathy                                           | NA | NA | NA | 1001 | 8 | 993 [Error: < 10 cases or controls]  |
| 747.13 Congenital anomalies of the ear, nose, and throat | NA | NA | NA | 1037 | 8 | 1029 [Error: < 10 cases or controls] |
| 430 Intracranial aneurysms                               | NA | NA | NA | 888  | 8 | 880 [Error: < 10 cases or controls]  |
| 394.1 Mitral valve disease                               | NA | NA | NA | 768  | 8 | 760 [Error: < 10 cases or controls]  |
| 420.3 Endocarditis                                       | NA | NA | NA | 984  | 8 | 976 [Error: < 10 cases or controls]  |
| 701.1 Keratoderma                                        | NA | NA | NA | 961  | 8 | 953 [Error: < 10 cases or controls]  |
| 195.1 Malignant neoplasms of the respiratory system      | NA | NA | NA | 974  | 8 | 966 [Error: < 10 cases or controls]  |
| 681.2 Cellulitis and abscesses                           | NA | NA | NA | 951  | 8 | 943 [Error: < 10 cases or controls]  |

|                      |    |    |    |      |   |      |                                 |
|----------------------|----|----|----|------|---|------|---------------------------------|
| 250.23 Type 2 diab   | NA | NA | NA | 817  | 8 | 809  | [Error: < 10 cases or controls] |
| 295.3 Psychosis      | NA | NA | NA | 690  | 8 | 682  | [Error: < 10 cases or controls] |
| 250.22 Type 2 diab   | NA | NA | NA | 817  | 8 | 809  | [Error: < 10 cases or controls] |
| 210 Benign neo       | NA | NA | NA | 1095 | 8 | 1087 | [Error: < 10 cases or controls] |
| 527.7 Disturbanc     | NA | NA | NA | 1054 | 8 | 1046 | [Error: < 10 cases or controls] |
| 362.23 Cystoid ma    | NA | NA | NA | 960  | 8 | 952  | [Error: < 10 cases or controls] |
| 842 Other sprai      | NA | NA | NA | 905  | 8 | 897  | [Error: < 10 cases or controls] |
| 481 Influenza        | NA | NA | NA | 845  | 8 | 837  | [Error: < 10 cases or controls] |
| 800.3 Fracture of    | NA | NA | NA | 962  | 8 | 954  | [Error: < 10 cases or controls] |
| 949 Allergies, oi    | NA | NA | NA | 874  | 8 | 866  | [Error: < 10 cases or controls] |
| 580 Nephritis; r     | NA | NA | NA | 990  | 8 | 982  | [Error: < 10 cases or controls] |
| 721.2 Spondylosi     | NA | NA | NA | 805  | 8 | 797  | [Error: < 10 cases or controls] |
| 709.6 Other speci    | NA | NA | NA | 872  | 8 | 864  | [Error: < 10 cases or controls] |
| 260 Protein-cal      | NA | NA | NA | 838  | 8 | 830  | [Error: < 10 cases or controls] |
| 907 Injuries to t    | NA | NA | NA | 1096 | 8 | 1088 | [Error: < 10 cases or controls] |
| 550.5 Ventral her    | NA | NA | NA | 1008 | 8 | 1000 | [Error: < 10 cases or controls] |
| 270.3 Disorders o    | NA | NA | NA | 1077 | 8 | 1069 | [Error: < 10 cases or controls] |
| 180 Cervical car     | NA | NA | NA | 917  | 8 | 909  | [Error: < 10 cases or controls] |
| 946 Anaphylact       | NA | NA | NA | 874  | 8 | 866  | [Error: < 10 cases or controls] |
| 568.1 Peritoneal     | NA | NA | NA | 976  | 8 | 968  | [Error: < 10 cases or controls] |
| 352.2 Facial nerv    | NA | NA | NA | 927  | 8 | 919  | [Error: < 10 cases or controls] |
| 614.51 Cervicitis ar | NA | NA | NA | 1030 | 8 | 1022 | [Error: < 10 cases or controls] |
| 348.8 Encephalop     | NA | NA | NA | 909  | 8 | 901  | [Error: < 10 cases or controls] |
| 365.2 Primary an     | NA | NA | NA | 963  | 8 | 955  | [Error: < 10 cases or controls] |
| 287.1 Spontaneo      | NA | NA | NA | 926  | 8 | 918  | [Error: < 10 cases or controls] |
| 871.1 Open woun      | NA | NA | NA | 1013 | 8 | 1005 | [Error: < 10 cases or controls] |
| 870.3 Other open     | NA | NA | NA | 1013 | 8 | 1005 | [Error: < 10 cases or controls] |
| 930 Allergic rea     | NA | NA | NA | 874  | 8 | 866  | [Error: < 10 cases or controls] |
| 272.12 Hyperglyce    | NA | NA | NA | 398  | 8 | 390  | [Error: < 10 cases or controls] |
| 362.3 Other nond     | NA | NA | NA | 960  | 8 | 952  | [Error: < 10 cases or controls] |
| 612.2 Hypertroph     | NA | NA | NA | 828  | 8 | 820  | [Error: < 10 cases or controls] |
| 615 Endometric       | NA | NA | NA | 1030 | 8 | 1022 | [Error: < 10 cases or controls] |
| 706.1 Acne           | NA | NA | NA | 955  | 8 | 947  | [Error: < 10 cases or controls] |

|                        |    |    |    |      |   |                                      |
|------------------------|----|----|----|------|---|--------------------------------------|
| 555.1 Regional er NA   | NA | NA | NA | 782  | 8 | 774 [Error: < 10 cases or controls]  |
| 727.5 Rupture of NA    | NA | NA | NA | 700  | 8 | 692 [Error: < 10 cases or controls]  |
| 751 Genitourin: NA     | NA | NA | NA | 1091 | 8 | 1083 [Error: < 10 cases or controls] |
| 363 Chorioretin NA     | NA | NA | NA | 963  | 8 | 955 [Error: < 10 cases or controls]  |
| 189.1 Cancer of k NA   | NA | NA | NA | 1097 | 8 | 1089 [Error: < 10 cases or controls] |
| 259.1 Nonspecific NA   | NA | NA | NA | 962  | 8 | 954 [Error: < 10 cases or controls]  |
| 395.6 Heart valve NA   | NA | NA | NA | 769  | 9 | 760 [Error: < 10 cases or controls]  |
| 578.9 Hemorrhag NA     | NA | NA | NA | 913  | 9 | 904 [Error: < 10 cases or controls]  |
| 172.11 Melanoma: NA    | NA | NA | NA | 874  | 9 | 865 [Error: < 10 cases or controls]  |
| 331.9 Cerebral de NA   | NA | NA | NA | 910  | 9 | 901 [Error: < 10 cases or controls]  |
| 286.81 Primary hy: NA  | NA | NA | NA | 927  | 9 | 918 [Error: < 10 cases or controls]  |
| 317.1 Alcoholism NA    | NA | NA | NA | 988  | 9 | 979 [Error: < 10 cases or controls]  |
| 550.6 Incisional h NA  | NA | NA | NA | 1009 | 9 | 1000 [Error: < 10 cases or controls] |
| 191 Malignant : NA     | NA | NA | NA | 1082 | 9 | 1073 [Error: < 10 cases or controls] |
| 379.9 Pain, swellii NA | NA | NA | NA | 905  | 9 | 896 [Error: < 10 cases or controls]  |
| 451 Phlebitis an NA    | NA | NA | NA | 870  | 9 | 861 [Error: < 10 cases or controls]  |
| 285.1 Acute postf NA   | NA | NA | NA | 988  | 9 | 979 [Error: < 10 cases or controls]  |
| 707.2 Chronic ulc: NA  | NA | NA | NA | 1086 | 9 | 1077 [Error: < 10 cases or controls] |
| 70.3 Viral hepatic NA  | NA | NA | NA | 920  | 9 | 911 [Error: < 10 cases or controls]  |
| 377.3 Optic neuro: NA  | NA | NA | NA | 905  | 9 | 896 [Error: < 10 cases or controls]  |
| 274.21 Chondrocal NA   | NA | NA | NA | 1072 | 9 | 1063 [Error: < 10 cases or controls] |
| 274.2 Crystal arth NA  | NA | NA | NA | 1072 | 9 | 1063 [Error: < 10 cases or controls] |
| 560 Intestinal o NA    | NA | NA | NA | 783  | 9 | 774 [Error: < 10 cases or controls]  |
| 327.1 Hypersomn NA     | NA | NA | NA | 829  | 9 | 820 [Error: < 10 cases or controls]  |
| 182 Malignant r NA     | NA | NA | NA | 958  | 9 | 949 [Error: < 10 cases or controls]  |
| 728 Disorders o NA     | NA | NA | NA | 701  | 9 | 692 [Error: < 10 cases or controls]  |
| 625.1 Dyspareuni NA    | NA | NA | NA | 986  | 9 | 977 [Error: < 10 cases or controls]  |
| 573.9 Abnormal s NA    | NA | NA | NA | 931  | 9 | 922 [Error: < 10 cases or controls]  |
| 270 Disorders o NA     | NA | NA | NA | 1078 | 9 | 1069 [Error: < 10 cases or controls] |
| 427.4 Cardiac arr: NA  | NA | NA | NA | 426  | 9 | 417 [Error: < 10 cases or controls]  |
| 364 Corneal op: NA     | NA | NA | NA | 964  | 9 | 955 [Error: < 10 cases or controls]  |
| 275.51 Hypocalcen NA   | NA | NA | NA | 1030 | 9 | 1021 [Error: < 10 cases or controls] |
| 585.4 Chronic kid NA   | NA | NA | NA | 991  | 9 | 982 [Error: < 10 cases or controls]  |

|                     |    |    |    |      |    |      |                                            |
|---------------------|----|----|----|------|----|------|--------------------------------------------|
| 480.1 Bacterial pr  | NA | NA | NA | 846  | 9  | 837  | [Error: < 10 cases or controls]            |
| 277.7 Dysmetabo     | NA | NA | NA | 1073 | 9  | 1064 | [Error: < 10 cases or controls]            |
| 960 Poisoning b     | NA | NA | NA | 991  | 9  | 982  | [Error: < 10 cases or controls]            |
| 626.2 Dysmenorr     | NA | NA | NA | 672  | 9  | 663  | [Error: < 10 cases or controls]            |
| 281.11 Pernicious   | NA | NA | NA | 988  | 9  | 979  | [Error: < 10 cases or controls]            |
| 367.8 Hypermetr     | NA | NA | NA | 998  | 9  | 989  | [Error: < 10 cases or controls]            |
| 696.41 Psoriasis vu | NA | NA | NA | 856  | 9  | 847  | [Error: < 10 cases or controls]            |
| 346.1 Nonspecific   | NA | NA | NA | 910  | 9  | 901  | [Error: < 10 cases or controls]            |
| 627.5 Premature     | NA | NA | NA | 672  | 9  | 663  | [Error: < 10 cases or controls]            |
| 530.14 Reflux esop  | NA | NA | NA | 700  | 9  | 691  | [Error: < 10 cases or controls]            |
| 275.1 Disorders o   | NA | NA | NA | 1030 | 9  | 1021 | [Error: < 10 cases or controls]            |
| 593.1 Gross hem     | NA | NA | NA | 759  | 9  | 750  | [Error: < 10 cases or controls]            |
| 251.1 Hypoglycen    | NA | NA | NA | 730  | 9  | 721  | [Error: < 10 cases or controls]            |
| 703.1 Ingrowing r   | NA | NA | NA | 1010 | 9  | 1001 | [Error: < 10 cases or controls]            |
| 187 Cancer of o     | NA | NA | NA | 1101 | NA | NA   | [Error: non-varying phenotype or genotype] |
| 259.3 Delay in se   | NA | NA | NA | 954  | NA | NA   | [Error: non-varying phenotype or genotype] |
| 872 Traumatic       | NA | NA | NA | 1005 | NA | NA   | [Error: non-varying phenotype or genotype] |
| 164 Cancer of ir    | NA | NA | NA | 1088 | NA | NA   | [Error: non-varying phenotype or genotype] |
| 614.54 Abscess or   | NA | NA | NA | 1022 | NA | NA   | [Error: non-varying phenotype or genotype] |
| 526.5 Inflammato    | NA | NA | NA | 1007 | NA | NA   | [Error: non-varying phenotype or genotype] |
| 185 Cancer of p     | NA | NA | NA | 1094 | NA | NA   | [Error: non-varying phenotype or genotype] |
| 601.3 Orchitis anc  | NA | NA | NA | 1094 | NA | NA   | [Error: non-varying phenotype or genotype] |
| 384.1 Myringitis    | NA | NA | NA | 918  | NA | NA   | [Error: non-varying phenotype or genotype] |
| 389.3 Degenerati    | NA | NA | NA | 909  | NA | NA   | [Error: non-varying phenotype or genotype] |
| 580.12 Non-prolife  | NA | NA | NA | 982  | NA | NA   | [Error: non-varying phenotype or genotype] |
| 149.2 Cancer of n   | NA | NA | NA | 1087 | NA | NA   | [Error: non-varying phenotype or genotype] |
| 526.3 Anomalies     | NA | NA | NA | 1007 | NA | NA   | [Error: non-varying phenotype or genotype] |
| 686.3 Pilonidal cy  | NA | NA | NA | 943  | NA | NA   | [Error: non-varying phenotype or genotype] |
| 159.4 Malignant r   | NA | NA | NA | 1048 | NA | NA   | [Error: non-varying phenotype or genotype] |
| 657 Infections s    | NA | NA | NA | 1102 | NA | NA   | [Error: non-varying phenotype or genotype] |
| 130 Spirochetal     | NA | NA | NA | 1089 | NA | NA   | [Error: non-varying phenotype or genotype] |
| 279.2 Autoimmun     | NA | NA | NA | 996  | NA | NA   | [Error: non-varying phenotype or genotype] |
| 362.1 Retinopath    | NA | NA | NA | 952  | NA | NA   | [Error: non-varying phenotype or genotype] |

|                       |    |    |    |      |    |    |                                            |
|-----------------------|----|----|----|------|----|----|--------------------------------------------|
| 117.4 Aspergillosi    | NA | NA | NA | 965  | NA | NA | [Error: non-varying phenotype or genotype] |
| 287.31 Primary thr    | NA | NA | NA | 918  | NA | NA | [Error: non-varying phenotype or genotype] |
| 609 Male infert       | NA | NA | NA | 1095 | NA | NA | [Error: non-varying phenotype or genotype] |
| 521.2 Dental abra     | NA | NA | NA | 1007 | NA | NA | [Error: non-varying phenotype or genotype] |
| 260.1 Cachexia        | NA | NA | NA | 830  | NA | NA | [Error: non-varying phenotype or genotype] |
| 303.1 Dissociative    | NA | NA | NA | 682  | NA | NA | [Error: non-varying phenotype or genotype] |
| 480.13 MRSA pneu      | NA | NA | NA | 837  | NA | NA | [Error: non-varying phenotype or genotype] |
| 656 Other perin       | NA | NA | NA | 1100 | NA | NA | [Error: non-varying phenotype or genotype] |
| 303.3 Psychogeni      | NA | NA | NA | 682  | NA | NA | [Error: non-varying phenotype or genotype] |
| 988 Toxic effect      | NA | NA | NA | 1096 | NA | NA | [Error: non-varying phenotype or genotype] |
| 174.2 Breast canc     | NA | NA | NA | 913  | NA | NA | [Error: non-varying phenotype or genotype] |
| 364.41 Keratoconu     | NA | NA | NA | 955  | NA | NA | [Error: non-varying phenotype or genotype] |
| 604.2 Vascular dis    | NA | NA | NA | 1095 | NA | NA | [Error: non-varying phenotype or genotype] |
| 292.6 Hallucinatic    | NA | NA | NA | 944  | NA | NA | [Error: non-varying phenotype or genotype] |
| 130.1 Lyme disea      | NA | NA | NA | 1089 | NA | NA | [Error: non-varying phenotype or genotype] |
| 958.1 Postoperati     | NA | NA | NA | 1098 | NA | NA | [Error: non-varying phenotype or genotype] |
| 426.25 Other hearl    | NA | NA | NA | 417  | NA | NA | [Error: non-varying phenotype or genotype] |
| 609.2 Abnormal s      | NA | NA | NA | 1095 | NA | NA | [Error: non-varying phenotype or genotype] |
| 626.15 Infertility, f | NA | NA | NA | 663  | NA | NA | [Error: non-varying phenotype or genotype] |
| 286.13 Congenital     | NA | NA | NA | 918  | NA | NA | [Error: non-varying phenotype or genotype] |
| 204.2 Myeloid leu     | NA | NA | NA | 1089 | NA | NA | [Error: non-varying phenotype or genotype] |
| 444.5 Atheroemb       | NA | NA | NA | 914  | NA | NA | [Error: non-varying phenotype or genotype] |
| 871.3 Open woun       | NA | NA | NA | 1005 | NA | NA | [Error: non-varying phenotype or genotype] |
| 133 Arthropod-        | NA | NA | NA | 1089 | NA | NA | [Error: non-varying phenotype or genotype] |
| 756.5 Congenital      | NA | NA | NA | 1073 | NA | NA | [Error: non-varying phenotype or genotype] |
| 620.1 Dysplasia o     | NA | NA | NA | 1059 | NA | NA | [Error: non-varying phenotype or genotype] |
| 736.1 Acquired d      | NA | NA | NA | 930  | NA | NA | [Error: non-varying phenotype or genotype] |
| 306.1 Mental disc     | NA | NA | NA | 682  | NA | NA | [Error: non-varying phenotype or genotype] |
| 246.2 Thyroid cys     | NA | NA | NA | 730  | NA | NA | [Error: non-varying phenotype or genotype] |
| 229.1 Benign neo      | NA | NA | NA | 1096 | NA | NA | [Error: non-varying phenotype or genotype] |
| 612.3 Congenital      | NA | NA | NA | 820  | NA | NA | [Error: non-varying phenotype or genotype] |
| 750.14 Congenital     | NA | NA | NA | 1083 | NA | NA | [Error: non-varying phenotype or genotype] |
| 856 Vascular co       | NA | NA | NA | 1039 | NA | NA | [Error: non-varying phenotype or genotype] |

|                     |    |    |    |      |    |    |                                            |
|---------------------|----|----|----|------|----|----|--------------------------------------------|
| 204.22 Myeloid leu  | NA | NA | NA | 1089 | NA | NA | [Error: non-varying phenotype or genotype] |
| 286.6 Defibrinatic  | NA | NA | NA | 918  | NA | NA | [Error: non-varying phenotype or genotype] |
| 592.21 Urethral sy  | NA | NA | NA | 750  | NA | NA | [Error: non-varying phenotype or genotype] |
| 230 Kaposi's sar    | NA | NA | NA | 1102 | NA | NA | [Error: non-varying phenotype or genotype] |
| 270.21 Disorders o  | NA | NA | NA | 1069 | NA | NA | [Error: non-varying phenotype or genotype] |
| 305.21 Anorexia n   | NA | NA | NA | 682  | NA | NA | [Error: non-varying phenotype or genotype] |
| 480.3 Pneumonia     | NA | NA | NA | 837  | NA | NA | [Error: non-varying phenotype or genotype] |
| 656.8 Perinatal ja  | NA | NA | NA | 1100 | NA | NA | [Error: non-varying phenotype or genotype] |
| 31.1 Leprosy        | NA | NA | NA | 1053 | NA | NA | [Error: non-varying phenotype or genotype] |
| 527.1 Hypertroph    | NA | NA | NA | 1046 | NA | NA | [Error: non-varying phenotype or genotype] |
| 729.7 Nontrauma     | NA | NA | NA | 692  | NA | NA | [Error: non-varying phenotype or genotype] |
| 79.9 Viremia, N     | NA | NA | NA | 911  | NA | NA | [Error: non-varying phenotype or genotype] |
| 202.2 Non-Hodgk     | NA | NA | NA | 1089 | NA | NA | [Error: non-varying phenotype or genotype] |
| 379.51 Pigmentary   | NA | NA | NA | 896  | NA | NA | [Error: non-varying phenotype or genotype] |
| 528.4 Cysts of ora  | NA | NA | NA | 1046 | NA | NA | [Error: non-varying phenotype or genotype] |
| 575.2 Obstructior   | NA | NA | NA | 1044 | NA | NA | [Error: non-varying phenotype or genotype] |
| 941 Adverse re      | NA | NA | NA | 866  | NA | NA | [Error: non-varying phenotype or genotype] |
| 949.1 Diaper or n   | NA | NA | NA | 866  | NA | NA | [Error: non-varying phenotype or genotype] |
| 327.6 Circadian r   | NA | NA | NA | 820  | NA | NA | [Error: non-varying phenotype or genotype] |
| 756.22 Pectus carir | NA | NA | NA | 1073 | NA | NA | [Error: non-varying phenotype or genotype] |
| 284.1 Pancytoper    | NA | NA | NA | 979  | NA | NA | [Error: non-varying phenotype or genotype] |
| 277.8 Carnitine d   | NA | NA | NA | 1064 | NA | NA | [Error: non-varying phenotype or genotype] |
| 187.2 Malignant r   | NA | NA | NA | 1101 | NA | NA | [Error: non-varying phenotype or genotype] |
| 229 Benign neo      | NA | NA | NA | 1096 | NA | NA | [Error: non-varying phenotype or genotype] |
| 368.3 Anisometrc    | NA | NA | NA | 1002 | NA | NA | [Error: non-varying phenotype or genotype] |
| 187.1 Malignant r   | NA | NA | NA | 1101 | NA | NA | [Error: non-varying phenotype or genotype] |
| 260.2 severe prot   | NA | NA | NA | 830  | NA | NA | [Error: non-varying phenotype or genotype] |
| 522.5 Periapical a  | NA | NA | NA | 1007 | NA | NA | [Error: non-varying phenotype or genotype] |
| 286.4 Acquired cc   | NA | NA | NA | 918  | NA | NA | [Error: non-varying phenotype or genotype] |
| 722.3 Schmorl's n   | NA | NA | NA | 797  | NA | NA | [Error: non-varying phenotype or genotype] |
| 315.1 Learning di   | NA | NA | NA | 1088 | NA | NA | [Error: non-varying phenotype or genotype] |
| 575.6 Cholesterol   | NA | NA | NA | 1044 | NA | NA | [Error: non-varying phenotype or genotype] |
| 702.4 Degenerati    | NA | NA | NA | 805  | NA | NA | [Error: non-varying phenotype or genotype] |



|                     |    |    |    |      |    |    |                                            |
|---------------------|----|----|----|------|----|----|--------------------------------------------|
| 81.1 Graft-versu    | NA | NA | NA | 1091 | NA | NA | [Error: non-varying phenotype or genotype] |
| 592.2 Urethritis a  | NA | NA | NA | 750  | NA | NA | [Error: non-varying phenotype or genotype] |
| 691.1 Ichthyosis c  | NA | NA | NA | 887  | NA | NA | [Error: non-varying phenotype or genotype] |
| 287.32 Secondary †  | NA | NA | NA | 918  | NA | NA | [Error: non-varying phenotype or genotype] |
| 530.15 Eosinophilic | NA | NA | NA | 691  | NA | NA | [Error: non-varying phenotype or genotype] |
| 695.21 Dermatitis † | NA | NA | NA | 887  | NA | NA | [Error: non-varying phenotype or genotype] |
| 145.1 Cancer of li  | NA | NA | NA | 1087 | NA | NA | [Error: non-varying phenotype or genotype] |
| 656.1 Isoimmuniz    | NA | NA | NA | 1100 | NA | NA | [Error: non-varying phenotype or genotype] |
| 605 Erectile dys    | NA | NA | NA | 1095 | NA | NA | [Error: non-varying phenotype or genotype] |
| 750.5 Congenital    | NA | NA | NA | 1083 | NA | NA | [Error: non-varying phenotype or genotype] |
| 983 Toxic effect    | NA | NA | NA | 1096 | NA | NA | [Error: non-varying phenotype or genotype] |
| 509.5 Respiratory   | NA | NA | NA | 935  | NA | NA | [Error: non-varying phenotype or genotype] |
| 253.11 Acromegaly   | NA | NA | NA | 954  | NA | NA | [Error: non-varying phenotype or genotype] |
| 624.2 Atrophy of    | NA | NA | NA | 977  | NA | NA | [Error: non-varying phenotype or genotype] |
| 259.8 Polyglandul   | NA | NA | NA | 954  | NA | NA | [Error: non-varying phenotype or genotype] |
| 735.22 Claw toe (a  | NA | NA | NA | 930  | NA | NA | [Error: non-varying phenotype or genotype] |
| 637 Short gesta     | NA | NA | NA | 1091 | NA | NA | [Error: non-varying phenotype or genotype] |
| 363.4 Choroidal d   | NA | NA | NA | 955  | NA | NA | [Error: non-varying phenotype or genotype] |
| 513.32 Orthopnea    | NA | NA | NA | 1061 | NA | NA | [Error: non-varying phenotype or genotype] |
| 281.9 Deficiency ;  | NA | NA | NA | 979  | NA | NA | [Error: non-varying phenotype or genotype] |
| 573.1 Chronic pas   | NA | NA | NA | 922  | NA | NA | [Error: non-varying phenotype or genotype] |
| 184.2 Cancer of o   | NA | NA | NA | 982  | NA | NA | [Error: non-varying phenotype or genotype] |
| 986 Toxic effect    | NA | NA | NA | 1096 | NA | NA | [Error: non-varying phenotype or genotype] |
| 586.3 Vascular dis  | NA | NA | NA | 982  | NA | NA | [Error: non-varying phenotype or genotype] |
| 938.1 Acute derr    | NA | NA | NA | 866  | NA | NA | [Error: non-varying phenotype or genotype] |
| 131 Protozoan i     | NA | NA | NA | 1089 | NA | NA | [Error: non-varying phenotype or genotype] |
| 560.2 Impaction c   | NA | NA | NA | 774  | NA | NA | [Error: non-varying phenotype or genotype] |
| 573.2 Liver replac  | NA | NA | NA | 922  | NA | NA | [Error: non-varying phenotype or genotype] |
| 283 Acquired h      | NA | NA | NA | 979  | NA | NA | [Error: non-varying phenotype or genotype] |
| 647.3 Major puer    | NA | NA | NA | 1100 | NA | NA | [Error: non-varying phenotype or genotype] |
| 132.1 Pediculosis   | NA | NA | NA | 1089 | NA | NA | [Error: non-varying phenotype or genotype] |
| 260.6 Anorexia      | NA | NA | NA | 830  | NA | NA | [Error: non-varying phenotype or genotype] |
| 712 Infective co    | NA | NA | NA | 914  | NA | NA | [Error: non-varying phenotype or genotype] |

|                     |    |    |    |      |    |    |                                            |
|---------------------|----|----|----|------|----|----|--------------------------------------------|
| 519.1 Tracheosto    | NA | NA | NA | 1041 | NA | NA | [Error: non-varying phenotype or genotype] |
| 291.1 Transient r   | NA | NA | NA | 944  | NA | NA | [Error: non-varying phenotype or genotype] |
| 433.32 Moyamoya     | NA | NA | NA | 880  | NA | NA | [Error: non-varying phenotype or genotype] |
| 359.1 Muscular d    | NA | NA | NA | 993  | NA | NA | [Error: non-varying phenotype or genotype] |
| 965.3 Salicylates c | NA | NA | NA | 982  | NA | NA | [Error: non-varying phenotype or genotype] |
| 324.1 Jakob-Creu    | NA | NA | NA | 1093 | NA | NA | [Error: non-varying phenotype or genotype] |
| 250.5 Glycosuria c  | NA | NA | NA | 809  | NA | NA | [Error: non-varying phenotype or genotype] |
| 601.4 Balanopost    | NA | NA | NA | 1094 | NA | NA | [Error: non-varying phenotype or genotype] |
| 442.3 Aneurysm c    | NA | NA | NA | 914  | NA | NA | [Error: non-varying phenotype or genotype] |
| 741.5 Hemarthro:    | NA | NA | NA | 868  | NA | NA | [Error: non-varying phenotype or genotype] |
| 287.4 Qualitative   | NA | NA | NA | 918  | NA | NA | [Error: non-varying phenotype or genotype] |
| 292.12 Symbolic d   | NA | NA | NA | 944  | NA | NA | [Error: non-varying phenotype or genotype] |
| 222 Benign neo      | NA | NA | NA | 1101 | NA | NA | [Error: non-varying phenotype or genotype] |
| 283.21 Hemolytic-i  | NA | NA | NA | 979  | NA | NA | [Error: non-varying phenotype or genotype] |
| 656.9 Neonatal b    | NA | NA | NA | 1100 | NA | NA | [Error: non-varying phenotype or genotype] |
| 721.8 Other alliec  | NA | NA | NA | 797  | NA | NA | [Error: non-varying phenotype or genotype] |
| 750.22 Congenital   | NA | NA | NA | 1083 | NA | NA | [Error: non-varying phenotype or genotype] |
| 976 Poisoning b     | NA | NA | NA | 982  | NA | NA | [Error: non-varying phenotype or genotype] |
| 710.2 Periostitis   | NA | NA | NA | 914  | NA | NA | [Error: non-varying phenotype or genotype] |
| 90.2 Gonococcal     | NA | NA | NA | 1100 | NA | NA | [Error: non-varying phenotype or genotype] |
| 752.1 Neural tubε   | NA | NA | NA | 1084 | NA | NA | [Error: non-varying phenotype or genotype] |
| 656.4 Hemorrhag     | NA | NA | NA | 1100 | NA | NA | [Error: non-varying phenotype or genotype] |
| 8.7 Intestinal ir   | NA | NA | NA | 1071 | NA | NA | [Error: non-varying phenotype or genotype] |
| 750.11 Esophageal   | NA | NA | NA | 1083 | NA | NA | [Error: non-varying phenotype or genotype] |
| 145.4 Cancer of tl  | NA | NA | NA | 1087 | NA | NA | [Error: non-varying phenotype or genotype] |
| 155.1 Malignant r   | NA | NA | NA | 1048 | NA | NA | [Error: non-varying phenotype or genotype] |
| 187.8 Neoplasm c    | NA | NA | NA | 1101 | NA | NA | [Error: non-varying phenotype or genotype] |
| 270.31 Polyclonal f | NA | NA | NA | 1069 | NA | NA | [Error: non-varying phenotype or genotype] |
| 965.2 Antirheumε    | NA | NA | NA | 982  | NA | NA | [Error: non-varying phenotype or genotype] |
| 984 Toxic effect    | NA | NA | NA | 1096 | NA | NA | [Error: non-varying phenotype or genotype] |
| 132 Infestation     | NA | NA | NA | 1089 | NA | NA | [Error: non-varying phenotype or genotype] |
| 257.1 Testicular h  | NA | NA | NA | 954  | NA | NA | [Error: non-varying phenotype or genotype] |
| 870.2 Open woun     | NA | NA | NA | 1005 | NA | NA | [Error: non-varying phenotype or genotype] |

|                        |    |    |    |         |    |                                            |
|------------------------|----|----|----|---------|----|--------------------------------------------|
| 731 Osteitis def NA    | NA | NA | NA | 900 NA  | NA | [Error: non-varying phenotype or genotype] |
| 751.12 Congenital NA   | NA | NA | NA | 1083 NA | NA | [Error: non-varying phenotype or genotype] |
| 823 Fracture of NA     | NA | NA | NA | 937 NA  | NA | [Error: non-varying phenotype or genotype] |
| 446.1 Thromboar NA     | NA | NA | NA | 914 NA  | NA | [Error: non-varying phenotype or genotype] |
| 368.5 Color visior NA  | NA | NA | NA | 1002 NA | NA | [Error: non-varying phenotype or genotype] |
| 797.1 Cardiogenic NA   | NA | NA | NA | 1098 NA | NA | [Error: non-varying phenotype or genotype] |
| 256.1 Hyperestro NA    | NA | NA | NA | 954 NA  | NA | [Error: non-varying phenotype or genotype] |
| 964 Poisoning b NA     | NA | NA | NA | 982 NA  | NA | [Error: non-varying phenotype or genotype] |
| 603.1 Hydrocele NA     | NA | NA | NA | 1095 NA | NA | [Error: non-varying phenotype or genotype] |
| 972.2 Antilipemic NA   | NA | NA | NA | 982 NA  | NA | [Error: non-varying phenotype or genotype] |
| 751.3 Obstructive NA   | NA | NA | NA | 1083 NA | NA | [Error: non-varying phenotype or genotype] |
| 258 Iatrogenic e NA    | NA | NA | NA | 954 NA  | NA | [Error: non-varying phenotype or genotype] |
| 500.1 Extrinsic all NA | NA | NA | NA | 935 NA  | NA | [Error: non-varying phenotype or genotype] |
| 626.21 Mittelschm NA   | NA | NA | NA | 663 NA  | NA | [Error: non-varying phenotype or genotype] |
| 656.2 Respiratory NA   | NA | NA | NA | 1100 NA | NA | [Error: non-varying phenotype or genotype] |
| 596.1 Bladder nec NA   | NA | NA | NA | 1023 NA | NA | [Error: non-varying phenotype or genotype] |
| 601.1 Prostatitis NA   | NA | NA | NA | 1094 NA | NA | [Error: non-varying phenotype or genotype] |
| 647.1 Infections c NA  | NA | NA | NA | 1100 NA | NA | [Error: non-varying phenotype or genotype] |
| 41.21 Rheumatic NA     | NA | NA | NA | 1053 NA | NA | [Error: non-varying phenotype or genotype] |
| 264.9 Lack of nori NA  | NA | NA | NA | 830 NA  | NA | [Error: non-varying phenotype or genotype] |
| 289.3 Personal hi: NA  | NA | NA | NA | 967 NA  | NA | [Error: non-varying phenotype or genotype] |
| 795 Other and r NA     | NA | NA | NA | 1094 NA | NA | [Error: non-varying phenotype or genotype] |
| 751.22 Other speci NA  | NA | NA | NA | 1083 NA | NA | [Error: non-varying phenotype or genotype] |
| 149.9 Cancer of o NA   | NA | NA | NA | 1087 NA | NA | [Error: non-varying phenotype or genotype] |
| 264 Lack of nori NA    | NA | NA | NA | 830 NA  | NA | [Error: non-varying phenotype or genotype] |
| 674 Other comç NA      | NA | NA | NA | 1100 NA | NA | [Error: non-varying phenotype or genotype] |
| 757 Congenital NA      | NA | NA | NA | 1085 NA | NA | [Error: non-varying phenotype or genotype] |
| 960.3 Poisoning b NA   | NA | NA | NA | 982 NA  | NA | [Error: non-varying phenotype or genotype] |
| 257 Testicular d NA    | NA | NA | NA | 954 NA  | NA | [Error: non-varying phenotype or genotype] |
| 967 Adverse eff NA     | NA | NA | NA | 982 NA  | NA | [Error: non-varying phenotype or genotype] |
| 599.7 Urethral dis: NA | NA | NA | NA | 771 NA  | NA | [Error: non-varying phenotype or genotype] |
| 601.8 Other inflar NA  | NA | NA | NA | 1094 NA | NA | [Error: non-varying phenotype or genotype] |
| 285.8 Hemoglobii NA    | NA | NA | NA | 979 NA  | NA | [Error: non-varying phenotype or genotype] |

|                    |    |    |    |      |    |    |                                            |
|--------------------|----|----|----|------|----|----|--------------------------------------------|
| 313.2 Tics and st  | NA | NA | NA | 1088 | NA | NA | [Error: non-varying phenotype or genotype] |
| 783.1 Postproced   | NA | NA | NA | 1007 | NA | NA | [Error: non-varying phenotype or genotype] |
| 204.3 Monocytic    | NA | NA | NA | 1089 | NA | NA | [Error: non-varying phenotype or genotype] |
| 264.2 Failure to t | NA | NA | NA | 830  | NA | NA | [Error: non-varying phenotype or genotype] |
| 526.8 Exostosis o  | NA | NA | NA | 1007 | NA | NA | [Error: non-varying phenotype or genotype] |
| 204.4 Multiple m   | NA | NA | NA | 1089 | NA | NA | [Error: non-varying phenotype or genotype] |
| 303.31 Gastrointes | NA | NA | NA | 682  | NA | NA | [Error: non-varying phenotype or genotype] |
| 624.1 Dystrophy c  | NA | NA | NA | 977  | NA | NA | [Error: non-varying phenotype or genotype] |
| 614.4 Inflammato   | NA | NA | NA | 1022 | NA | NA | [Error: non-varying phenotype or genotype] |
| 264.1 Short statu  | NA | NA | NA | 830  | NA | NA | [Error: non-varying phenotype or genotype] |
| 710.3 Osteopathy   | NA | NA | NA | 914  | NA | NA | [Error: non-varying phenotype or genotype] |
| 283.2 Non-autoim   | NA | NA | NA | 979  | NA | NA | [Error: non-varying phenotype or genotype] |
| 325 Phlebitis an   | NA | NA | NA | 1093 | NA | NA | [Error: non-varying phenotype or genotype] |
| 981 Toxic effect   | NA | NA | NA | 1096 | NA | NA | [Error: non-varying phenotype or genotype] |
| 81.11 Acute graft  | NA | NA | NA | 1091 | NA | NA | [Error: non-varying phenotype or genotype] |
| 225.2 Benign neo   | NA | NA | NA | 1073 | NA | NA | [Error: non-varying phenotype or genotype] |
| 348.4 Cerebral cy  | NA | NA | NA | 901  | NA | NA | [Error: non-varying phenotype or genotype] |
| 635.3 Placenta pr  | NA | NA | NA | 1091 | NA | NA | [Error: non-varying phenotype or genotype] |
| 41.9 Infection w   | NA | NA | NA | 1053 | NA | NA | [Error: non-varying phenotype or genotype] |
| 261.1 Vitamin A d  | NA | NA | NA | 830  | NA | NA | [Error: non-varying phenotype or genotype] |
| 656.5 Hematologi   | NA | NA | NA | 1100 | NA | NA | [Error: non-varying phenotype or genotype] |
| 586.12 Vesicouretr | NA | NA | NA | 982  | NA | NA | [Error: non-varying phenotype or genotype] |
| 145.2 Cancer of t  | NA | NA | NA | 1087 | NA | NA | [Error: non-varying phenotype or genotype] |
| 250.13 Type 1 diab | NA | NA | NA | 809  | NA | NA | [Error: non-varying phenotype or genotype] |
| 284.2 Constitutio  | NA | NA | NA | 979  | NA | NA | [Error: non-varying phenotype or genotype] |
| 285.3 Sideroblast  | NA | NA | NA | 979  | NA | NA | [Error: non-varying phenotype or genotype] |
| 389.5 Disorders o  | NA | NA | NA | 909  | NA | NA | [Error: non-varying phenotype or genotype] |
| 711.2 Reiter's dis | NA | NA | NA | 914  | NA | NA | [Error: non-varying phenotype or genotype] |
| 313.3 Autism       | NA | NA | NA | 1088 | NA | NA | [Error: non-varying phenotype or genotype] |
| 749.2 Congenital   | NA | NA | NA | 1096 | NA | NA | [Error: non-varying phenotype or genotype] |
| 90 Sexually tra    | NA | NA | NA | 1100 | NA | NA | [Error: non-varying phenotype or genotype] |
| 736.3 Acquired d   | NA | NA | NA | 930  | NA | NA | [Error: non-varying phenotype or genotype] |
| 270.38 Other speci | NA | NA | NA | 1069 | NA | NA | [Error: non-varying phenotype or genotype] |

|                                                                              |    |    |    |      |    |    |                                            |
|------------------------------------------------------------------------------|----|----|----|------|----|----|--------------------------------------------|
| 255.22 Mineralocorticoid disorders                                           | NA | NA | NA | 954  | NA | NA | [Error: non-varying phenotype or genotype] |
| 604 Disorders of mineralocorticoid metabolism                                | NA | NA | NA | 1095 | NA | NA | [Error: non-varying phenotype or genotype] |
| 733.6 Costochondritis                                                        | NA | NA | NA | 900  | NA | NA | [Error: non-varying phenotype or genotype] |
| 277.2 Other disorders of the chest wall                                      | NA | NA | NA | 1064 | NA | NA | [Error: non-varying phenotype or genotype] |
| 275.2 Disorders of the chest wall                                            | NA | NA | NA | 1021 | NA | NA | [Error: non-varying phenotype or genotype] |
| 255.3 Adrenogenital disorders                                                | NA | NA | NA | 954  | NA | NA | [Error: non-varying phenotype or genotype] |
| 202.23 Lymphosarcoma                                                         | NA | NA | NA | 1089 | NA | NA | [Error: non-varying phenotype or genotype] |
| 528.3 Cellulitis and abscesses                                               | NA | NA | NA | 1046 | NA | NA | [Error: non-varying phenotype or genotype] |
| 634.3 Ectopic pregnancy                                                      | NA | NA | NA | 1091 | NA | NA | [Error: non-varying phenotype or genotype] |
| 964.1 Anticoagulants                                                         | NA | NA | NA | 982  | NA | NA | [Error: non-varying phenotype or genotype] |
| 962.3 Hormones and hormone therapy                                           | NA | NA | NA | 982  | NA | NA | [Error: non-varying phenotype or genotype] |
| 654 Other and unspecified disorders of the endocrine system                  | NA | NA | NA | 1097 | NA | NA | [Error: non-varying phenotype or genotype] |
| 870.8 Open wounds, lacerations and tears, not elsewhere classified           | NA | NA | NA | 1005 | NA | NA | [Error: non-varying phenotype or genotype] |
| 368.7 Disorders of the musculoskeletal system                                | NA | NA | NA | 1002 | NA | NA | [Error: non-varying phenotype or genotype] |
| 599.1 Urinary obstruction                                                    | NA | NA | NA | 771  | NA | NA | [Error: non-varying phenotype or genotype] |
| 656.26 Transitory tremor                                                     | NA | NA | NA | 1100 | NA | NA | [Error: non-varying phenotype or genotype] |
| 285.22 Anemia in renal disease                                               | NA | NA | NA | 979  | NA | NA | [Error: non-varying phenotype or genotype] |
| 874 Complications of wounds, lacerations and tears, not elsewhere classified | NA | NA | NA | 1005 | NA | NA | [Error: non-varying phenotype or genotype] |
| 756.21 Pectus excavatum                                                      | NA | NA | NA | 1073 | NA | NA | [Error: non-varying phenotype or genotype] |
| 358.1 Myasthenia gravis                                                      | NA | NA | NA | 993  | NA | NA | [Error: non-varying phenotype or genotype] |
| 286.3 Coagulation disorders                                                  | NA | NA | NA | 918  | NA | NA | [Error: non-varying phenotype or genotype] |
| 656.22 Interstitial cystitis                                                 | NA | NA | NA | 1100 | NA | NA | [Error: non-varying phenotype or genotype] |
| 149.5 Hx of malignant neoplasm                                               | NA | NA | NA | 1087 | NA | NA | [Error: non-varying phenotype or genotype] |
| 960.1 Adverse effects of drugs                                               | NA | NA | NA | 982  | NA | NA | [Error: non-varying phenotype or genotype] |
| 536.7 Complications of pregnancy, childbirth and the puerperium              | NA | NA | NA | 976  | NA | NA | [Error: non-varying phenotype or genotype] |
| 614.33 Pelvic inflammatory disease                                           | NA | NA | NA | 1022 | NA | NA | [Error: non-varying phenotype or genotype] |
| 528.41 Cyst of the pancreas                                                  | NA | NA | NA | 1046 | NA | NA | [Error: non-varying phenotype or genotype] |
| 157 Pancreatic disorders                                                     | NA | NA | NA | 1048 | NA | NA | [Error: non-varying phenotype or genotype] |
| 301.1 Schizoid personality disorder                                          | NA | NA | NA | 682  | NA | NA | [Error: non-varying phenotype or genotype] |
| 275.53 Disorders of the eye                                                  | NA | NA | NA | 1021 | NA | NA | [Error: non-varying phenotype or genotype] |
| 523.32 Chronic periodontitis                                                 | NA | NA | NA | 1007 | NA | NA | [Error: non-varying phenotype or genotype] |
| 603.2 Spermatocystitis                                                       | NA | NA | NA | 1095 | NA | NA | [Error: non-varying phenotype or genotype] |
| 364.9 Cornea repair                                                          | NA | NA | NA | 955  | NA | NA | [Error: non-varying phenotype or genotype] |

|                        |    |    |    |         |    |                                            |
|------------------------|----|----|----|---------|----|--------------------------------------------|
| 604.1 Redundant NA     | NA | NA | NA | 1095 NA | NA | [Error: non-varying phenotype or genotype] |
| 521.4 Tooth comr NA    | NA | NA | NA | 1007 NA | NA | [Error: non-varying phenotype or genotype] |
| 656.6 Perinatal di NA  | NA | NA | NA | 1100 NA | NA | [Error: non-varying phenotype or genotype] |
| 751.11 Congenital NA   | NA | NA | NA | 1083 NA | NA | [Error: non-varying phenotype or genotype] |
| 987 Toxic effect NA    | NA | NA | NA | 1096 NA | NA | [Error: non-varying phenotype or genotype] |
| 324 Other CNS i NA     | NA | NA | NA | 1093 NA | NA | [Error: non-varying phenotype or genotype] |
| 446.2 Acute febril NA  | NA | NA | NA | 914 NA  | NA | [Error: non-varying phenotype or genotype] |
| 512.3 Abnormal c NA    | NA | NA | NA | 413 NA  | NA | [Error: non-varying phenotype or genotype] |
| 446.6 Polyarteriti: NA | NA | NA | NA | 914 NA  | NA | [Error: non-varying phenotype or genotype] |
| 729.1 Rheumatisr NA    | NA | NA | NA | 692 NA  | NA | [Error: non-varying phenotype or genotype] |
| 261.3 Vitamin C d NA   | NA | NA | NA | 830 NA  | NA | [Error: non-varying phenotype or genotype] |
| 971 Poisoning b NA     | NA | NA | NA | 982 NA  | NA | [Error: non-varying phenotype or genotype] |
| 282.9 Other here: NA   | NA | NA | NA | 979 NA  | NA | [Error: non-varying phenotype or genotype] |
| 741.6 Villonodula NA   | NA | NA | NA | 868 NA  | NA | [Error: non-varying phenotype or genotype] |
| 498 Acute bron: NA     | NA | NA | NA | 854 NA  | NA | [Error: non-varying phenotype or genotype] |
| 749.1 Cleft palate NA  | NA | NA | NA | 964 NA  | NA | [Error: non-varying phenotype or genotype] |
| 201 Hodgkin's d NA     | NA | NA | NA | 1089 NA | NA | [Error: non-varying phenotype or genotype] |
| 560.3 Peritoneal c NA  | NA | NA | NA | 774 NA  | NA | [Error: non-varying phenotype or genotype] |
| 780 Hypotherm NA       | NA | NA | NA | 1102 NA | NA | [Error: non-varying phenotype or genotype] |
| 600 Hyperplasi: NA     | NA | NA | NA | 1094 NA | NA | [Error: non-varying phenotype or genotype] |
| 149.1 Cancer of o NA   | NA | NA | NA | 1087 NA | NA | [Error: non-varying phenotype or genotype] |
| 966 Poisoning b NA     | NA | NA | NA | 982 NA  | NA | [Error: non-varying phenotype or genotype] |
| 602.3 Dysplasia o: NA  | NA | NA | NA | 1094 NA | NA | [Error: non-varying phenotype or genotype] |
| 742.1 Loose body NA    | NA | NA | NA | 868 NA  | NA | [Error: non-varying phenotype or genotype] |
| 939.1 Contact an: NA   | NA | NA | NA | 866 NA  | NA | [Error: non-varying phenotype or genotype] |
| 974 Poisoning b NA     | NA | NA | NA | 982 NA  | NA | [Error: non-varying phenotype or genotype] |
| 272.14 Hyperchylo NA   | NA | NA | NA | 390 NA  | NA | [Error: non-varying phenotype or genotype] |
| 500 Lung diseas NA     | NA | NA | NA | 935 NA  | NA | [Error: non-varying phenotype or genotype] |
| 440.21 Atheroscler NA  | NA | NA | NA | 914 NA  | NA | [Error: non-varying phenotype or genotype] |
| 259.4 Precocious NA    | NA | NA | NA | 954 NA  | NA | [Error: non-varying phenotype or genotype] |
| 716.3 Kaschin-Ber: NA  | NA | NA | NA | 914 NA  | NA | [Error: non-varying phenotype or genotype] |
| 289.1 Myelofibro: NA   | NA | NA | NA | 967 NA  | NA | [Error: non-varying phenotype or genotype] |
| 271.9 Other disor NA   | NA | NA | NA | 1098 NA | NA | [Error: non-varying phenotype or genotype] |

|                     |    |    |    |      |    |    |                                            |
|---------------------|----|----|----|------|----|----|--------------------------------------------|
| 644 Anemia dur      | NA | NA | NA | 1101 | NA | NA | [Error: non-varying phenotype or genotype] |
| 957 Injury to ot    | NA | NA | NA | 1102 | NA | NA | [Error: non-varying phenotype or genotype] |
| 574.11 Cholelithias | NA | NA | NA | 1044 | NA | NA | [Error: non-varying phenotype or genotype] |
| 279.8 Other speci   | NA | NA | NA | 996  | NA | NA | [Error: non-varying phenotype or genotype] |
| 601 Inflammatic     | NA | NA | NA | 1094 | NA | NA | [Error: non-varying phenotype or genotype] |
| 608 Other disor     | NA | NA | NA | 1095 | NA | NA | [Error: non-varying phenotype or genotype] |
| 750.13 Congenital   | NA | NA | NA | 1083 | NA | NA | [Error: non-varying phenotype or genotype] |
| 216.1 Screening f   | NA | NA | NA | 866  | NA | NA | [Error: non-varying phenotype or genotype] |
| 361.2 Retinoschis   | NA | NA | NA | 955  | NA | NA | [Error: non-varying phenotype or genotype] |
| 323.2 Acute (tran   | NA | NA | NA | 1093 | NA | NA | [Error: non-varying phenotype or genotype] |
| 264.3 Delayed mi    | NA | NA | NA | 830  | NA | NA | [Error: non-varying phenotype or genotype] |
| 602 Other disor     | NA | NA | NA | 1094 | NA | NA | [Error: non-varying phenotype or genotype] |
| 696.2 Parapsorias   | NA | NA | NA | 887  | NA | NA | [Error: non-varying phenotype or genotype] |
| 575.1 Cholangitis   | NA | NA | NA | 1044 | NA | NA | [Error: non-varying phenotype or genotype] |
| 270.11 Disturbanc   | NA | NA | NA | 1069 | NA | NA | [Error: non-varying phenotype or genotype] |
| 737.2 Lordosis (ac  | NA | NA | NA | 930  | NA | NA | [Error: non-varying phenotype or genotype] |
| 117.3 Blastomyco    | NA | NA | NA | 965  | NA | NA | [Error: non-varying phenotype or genotype] |
| 695.1 Toxic eryth   | NA | NA | NA | 887  | NA | NA | [Error: non-varying phenotype or genotype] |
| 260.22 Nutritional  | NA | NA | NA | 830  | NA | NA | [Error: non-varying phenotype or genotype] |
| 282.5 Sickle cell a | NA | NA | NA | 979  | NA | NA | [Error: non-varying phenotype or genotype] |
| 459.7 Blood vess    | NA | NA | NA | 986  | NA | NA | [Error: non-varying phenotype or genotype] |
| 614.32 Chronic infl | NA | NA | NA | 1022 | NA | NA | [Error: non-varying phenotype or genotype] |
| 756.2 Pectus and    | NA | NA | NA | 1073 | NA | NA | [Error: non-varying phenotype or genotype] |
| 580.2 Nephrotic s   | NA | NA | NA | 982  | NA | NA | [Error: non-varying phenotype or genotype] |
| 603 Other disor     | NA | NA | NA | 1095 | NA | NA | [Error: non-varying phenotype or genotype] |
| 300.2 Generalizec   | NA | NA | NA | 682  | NA | NA | [Error: non-varying phenotype or genotype] |
| 360.3 Hypotony c    | NA | NA | NA | 955  | NA | NA | [Error: non-varying phenotype or genotype] |
| 601.12 Chronic prc  | NA | NA | NA | 1094 | NA | NA | [Error: non-varying phenotype or genotype] |
| 564.9 Personal hi   | NA | NA | NA | 774  | NA | NA | [Error: non-varying phenotype or genotype] |
| 604.3 Peyronie's c  | NA | NA | NA | 1095 | NA | NA | [Error: non-varying phenotype or genotype] |
| 283.1 Autoimmun     | NA | NA | NA | 979  | NA | NA | [Error: non-varying phenotype or genotype] |
| 312.3 Impulse cor   | NA | NA | NA | 1088 | NA | NA | [Error: non-varying phenotype or genotype] |
| 736.5 Acquired d    | NA | NA | NA | 930  | NA | NA | [Error: non-varying phenotype or genotype] |

|                                             |    |    |    |      |    |    |                                            |
|---------------------------------------------|----|----|----|------|----|----|--------------------------------------------|
| 202.21 Nodular lymphadenitis                | NA | NA | NA | 1089 | NA | NA | [Error: non-varying phenotype or genotype] |
| 253.5 Pituitary dysfunction                 | NA | NA | NA | 954  | NA | NA | [Error: non-varying phenotype or genotype] |
| 751.1 Congenital hypothyroidism             | NA | NA | NA | 1083 | NA | NA | [Error: non-varying phenotype or genotype] |
| 531.1 Hemorrhagic disease of the newborn    | NA | NA | NA | 1057 | NA | NA | [Error: non-varying phenotype or genotype] |
| 669 Complications of pregnancy              | NA | NA | NA | 1102 | NA | NA | [Error: non-varying phenotype or genotype] |
| 753.1 Congenital hypothyroidism             | NA | NA | NA | 1084 | NA | NA | [Error: non-varying phenotype or genotype] |
| 781.1 Loss of height                        | NA | NA | NA | 1066 | NA | NA | [Error: non-varying phenotype or genotype] |
| 204.11 Lymphoid leukemia                    | NA | NA | NA | 1089 | NA | NA | [Error: non-varying phenotype or genotype] |
| 442.2 Aneurysm of the aorta                 | NA | NA | NA | 914  | NA | NA | [Error: non-varying phenotype or genotype] |
| 973 Poisoning by barbiturates               | NA | NA | NA | 982  | NA | NA | [Error: non-varying phenotype or genotype] |
| 528.11 Stomatitis                           | NA | NA | NA | 1046 | NA | NA | [Error: non-varying phenotype or genotype] |
| 90.3 Venereal diseases                      | NA | NA | NA | 1100 | NA | NA | [Error: non-varying phenotype or genotype] |
| 364.2 Corneal edema                         | NA | NA | NA | 955  | NA | NA | [Error: non-varying phenotype or genotype] |
| 656.7 Conditions of the eye                 | NA | NA | NA | 1100 | NA | NA | [Error: non-varying phenotype or genotype] |
| 333.3 Tics and chorea                       | NA | NA | NA | 901  | NA | NA | [Error: non-varying phenotype or genotype] |
| 529.1 Glossitis                             | NA | NA | NA | 1046 | NA | NA | [Error: non-varying phenotype or genotype] |
| 942 Infusion and transfusion reactions      | NA | NA | NA | 866  | NA | NA | [Error: non-varying phenotype or genotype] |
| 654.2 Rhesus isoimmunization                | NA | NA | NA | 1097 | NA | NA | [Error: non-varying phenotype or genotype] |
| 530.7 Gastroesophageal reflux disease       | NA | NA | NA | 691  | NA | NA | [Error: non-varying phenotype or genotype] |
| 656.3 Endocrine disorders                   | NA | NA | NA | 1100 | NA | NA | [Error: non-varying phenotype or genotype] |
| 676 Other disorders of the endocrine system | NA | NA | NA | 1100 | NA | NA | [Error: non-varying phenotype or genotype] |
| 755.3 Congenital hypothyroidism             | NA | NA | NA | 1073 | NA | NA | [Error: non-varying phenotype or genotype] |
| 270.35 Macroglobulinemia                    | NA | NA | NA | 1069 | NA | NA | [Error: non-varying phenotype or genotype] |
| 270.2 Disorders of hemostasis               | NA | NA | NA | 1069 | NA | NA | [Error: non-varying phenotype or genotype] |
| 796 Elevated prothrombin time               | NA | NA | NA | 1094 | NA | NA | [Error: non-varying phenotype or genotype] |
| 286.11 Von Willebrand disease               | NA | NA | NA | 918  | NA | NA | [Error: non-varying phenotype or genotype] |
| 255.13 Medulloblastoma                      | NA | NA | NA | 954  | NA | NA | [Error: non-varying phenotype or genotype] |
| 250.21 Type 2 diabetes mellitus             | NA | NA | NA | 809  | NA | NA | [Error: non-varying phenotype or genotype] |
| 260.21 Kwashiorkor                          | NA | NA | NA | 830  | NA | NA | [Error: non-varying phenotype or genotype] |
| 569.1 Toxic gastritis                       | NA | NA | NA | 968  | NA | NA | [Error: non-varying phenotype or genotype] |
| 636.3 Hemorrhagic disease of the newborn    | NA | NA | NA | 1091 | NA | NA | [Error: non-varying phenotype or genotype] |
| 528.7 Sialolithiasis                        | NA | NA | NA | 1046 | NA | NA | [Error: non-varying phenotype or genotype] |
| 270.12 Phenylketonuria                      | NA | NA | NA | 1069 | NA | NA | [Error: non-varying phenotype or genotype] |



|                         |    |    |    |         |    |                                            |
|-------------------------|----|----|----|---------|----|--------------------------------------------|
| 755.4 Congenital NA     | NA | NA | NA | 1073 NA | NA | [Error: non-varying phenotype or genotype] |
| 975 Poisoning b NA      | NA | NA | NA | 982 NA  | NA | [Error: non-varying phenotype or genotype] |
| 145.5 Cancer of tl NA   | NA | NA | NA | 1087 NA | NA | [Error: non-varying phenotype or genotype] |
| 371.9 Chronic infl NA   | NA | NA | NA | 878 NA  | NA | [Error: non-varying phenotype or genotype] |
| 706.3 Seborrhea NA      | NA | NA | NA | 947 NA  | NA | [Error: non-varying phenotype or genotype] |
| 528.6 Leukoplakiã NA    | NA | NA | NA | 1046 NA | NA | [Error: non-varying phenotype or genotype] |
| 601.11 Acute prost NA   | NA | NA | NA | 1094 NA | NA | [Error: non-varying phenotype or genotype] |
| 609.1 Infertility, n NA | NA | NA | NA | 1095 NA | NA | [Error: non-varying phenotype or genotype] |
| 952 Spinal cord NA      | NA | NA | NA | 1102 NA | NA | [Error: non-varying phenotype or genotype] |
| 597.2 Urinary con NA    | NA | NA | NA | 1023 NA | NA | [Error: non-varying phenotype or genotype] |
| 81.12 Chronic gra NA    | NA | NA | NA | 1091 NA | NA | [Error: non-varying phenotype or genotype] |
| 513.31 Apnea NA         | NA | NA | NA | 1061 NA | NA | [Error: non-varying phenotype or genotype] |
| 972.6 Antihypertẽ NA    | NA | NA | NA | 982 NA  | NA | [Error: non-varying phenotype or genotype] |
| 736.4 Genu valgu NA     | NA | NA | NA | 930 NA  | NA | [Error: non-varying phenotype or genotype] |
| 731.1 Osteitis def NA   | NA | NA | NA | 900 NA  | NA | [Error: non-varying phenotype or genotype] |
| 686.5 Pyoderma NA       | NA | NA | NA | 943 NA  | NA | [Error: non-varying phenotype or genotype] |
| 609.11 Azoosperm NA     | NA | NA | NA | 1095 NA | NA | [Error: non-varying phenotype or genotype] |
| 752.11 Spina bifida NA  | NA | NA | NA | 1084 NA | NA | [Error: non-varying phenotype or genotype] |
| 117.2 Coccidioido NA    | NA | NA | NA | 965 NA  | NA | [Error: non-varying phenotype or genotype] |
| 250.11 Type 1 diab NA   | NA | NA | NA | 809 NA  | NA | [Error: non-varying phenotype or genotype] |
| 149.3 Cancer of h NA    | NA | NA | NA | 1087 NA | NA | [Error: non-varying phenotype or genotype] |
| 364.4 Corneal deę NA    | NA | NA | NA | 955 NA  | NA | [Error: non-varying phenotype or genotype] |
| 537.1 Lesions of s NA   | NA | NA | NA | 976 NA  | NA | [Error: non-varying phenotype or genotype] |
| 790.9 Abnormal a NA     | NA | NA | NA | 951 NA  | NA | [Error: non-varying phenotype or genotype] |
| 500.2 Pneumocor NA      | NA | NA | NA | 935 NA  | NA | [Error: non-varying phenotype or genotype] |
| 204.21 Myeloid leu NA   | NA | NA | NA | 1089 NA | NA | [Error: non-varying phenotype or genotype] |
| 202.24 Large cell ly NA | NA | NA | NA | 1089 NA | NA | [Error: non-varying phenotype or genotype] |
| 8.51 Intestinal e NA    | NA | NA | NA | 1071 NA | NA | [Error: non-varying phenotype or genotype] |
| 860 Bone marrc NA       | NA | NA | NA | 1102 NA | NA | [Error: non-varying phenotype or genotype] |
| 263 Other nutri NA      | NA | NA | NA | 830 NA  | NA | [Error: non-varying phenotype or genotype] |
| 636.2 Early onset NA    | NA | NA | NA | 1091 NA | NA | [Error: non-varying phenotype or genotype] |
| 159.3 Malignant r NA    | NA | NA | NA | 1048 NA | NA | [Error: non-varying phenotype or genotype] |
| 202.22 Reticulosar NA   | NA | NA | NA | 1089 NA | NA | [Error: non-varying phenotype or genotype] |

|                     |    |    |    |        |    |                                            |
|---------------------|----|----|----|--------|----|--------------------------------------------|
| 446.7 Takayasu's NA | NA | NA | NA | 914 NA | NA | [Error: non-varying phenotype or genotype] |
|---------------------|----|----|----|--------|----|--------------------------------------------|

Supplemental table E6: RDW is associated with echocardiographic findings of right and left heart dysfunction in non-anemic patients

| Echocardiographic characteristic                  | Odds ratio (25th vs. 75th) | Lower 0.95 | Upper 0.95 | Predicted Median Value at 25 <sup>th</sup> % RDW | Predicted Median Value at 75 <sup>th</sup> % RDW | P values               | N    |
|---------------------------------------------------|----------------------------|------------|------------|--------------------------------------------------|--------------------------------------------------|------------------------|------|
| Right ventricular systolic pressure               | 1.80                       | 1.70       | 1.92       | 27.5mmHg                                         | 33.1mmHg                                         | <1 x10 <sup>-7</sup>   | 4020 |
| Right atrial pressure                             | 1.61                       | 1.51       | 1.72       | 3.7mmHg                                          | 4.7mmHg                                          | <1 x10 <sup>-7</sup>   | 3496 |
| Right ventricular outflow tract acceleration time | 0.69                       | 0.63       | 0.75       | 131ms                                            | 117ms                                            | <1 x10 <sup>-7</sup>   | 2187 |
| Left ventricle posterior wall diameter            | 1.19                       | 1.12       | 1.25       | 9.0mm                                            | 9.8mm                                            | <1 x10 <sup>-7</sup>   | 4443 |
| Left ventricle internal diameter end-diastole     | 1.19                       | 1.12       | 1.26       | 42.5mm                                           | 43.8mm                                           | <1 x10 <sup>-7</sup>   | 4458 |
| Left ventricle internal diameter end-systole      | 1.19                       | 1.12       | 1.26       | 27.0mm                                           | 28.0mm                                           | <1 x10 <sup>-7</sup>   | 4419 |
| Right atrial size                                 | 1.40                       | 1.25       | 1.57       | N/A                                              | N/A                                              | <1 x10 <sup>-7</sup>   | 2451 |
| Right ventricle size                              | 1.43                       | 1.26       | 1.62       | N/A                                              | N/A                                              | <1 x10 <sup>-7</sup>   | 2557 |
| Right ventricle function                          | 1.46                       | 1.27       | 1.68       | N/A                                              | N/A                                              | <1.1 x10 <sup>-7</sup> | 2521 |
| Left atrial size                                  | 1.25                       | 1.15       | 1.37       | N/A                                              | N/A                                              | 5.7 x10 <sup>-7</sup>  | 2545 |
| Left ventricle function                           | 1.37                       | 1.19       | 1.57       | N/A                                              | N/A                                              | 8.3 x10 <sup>-6</sup>  | 2568 |
| Interventricular septum diameter                  | 1.14                       | 1.07       | 1.21       | 10.3m                                            | 10.9mm                                           | 2.8 x10 <sup>-5</sup>  | 3481 |
| Left ventricular ejection fraction                | 0.89                       | 0.84       | 0.94       | 54.4%                                            | 54.1%                                            | 0.0002                 | 4374 |
| Left ventricle function                           | 1.11                       | 1.04       | 1.18       | Na                                               | Na                                               | 0.002                  | 4447 |
| Aortic root diameter                              | 1.09                       | 1.03       | 1.16       | 28.0mm                                           | 28.6mm                                           | 0.002                  | 4193 |
| Right ventricle internal diameter end-diastole    | 1.16                       | 1.05       | 1.27       | 29.8mm                                           | 29.5mm                                           | 0.003                  | 1659 |
| Mitral valve deceleration time                    | 0.91                       | 0.84       | 0.99       | 209ms                                            | 203ms                                            | 0.03                   | 2081 |

Increased odds ratio represents worsening function and larger size for ventricular measurements.  
P value threshold after Bonferroni correction: 0.003

Supplemental Table E7: The association of RDW with standard hemodynamic parameters obtained by right heart catheterization

| Measurement                                                         | Odds ratio (75th vs. 25th) | Lower 0.95 | Upper 0.95 | Predicted Value at 25 <sup>th</sup> % RDW | Predicted Value at 75 <sup>th</sup> % RDW | P values              | N   |
|---------------------------------------------------------------------|----------------------------|------------|------------|-------------------------------------------|-------------------------------------------|-----------------------|-----|
| Pulmonary artery oxygen saturation                                  | 0.37                       | 0.32       | 0.44       | 73%                                       | 67%                                       | <1 x10 <sup>-7</sup>  | 611 |
| Mean pulmonary artery pressure                                      | 2.77                       | 2.35       | 3.26       | 21mmHg                                    | 33mmHg                                    | <1 x10 <sup>-7</sup>  | 618 |
| Right atrial oxygen saturation                                      | 0.41                       | 0.34       | 0.50       | 66%                                       | 73%                                       | <1 x10 <sup>-7</sup>  | 410 |
| Diastolic pulmonary artery pressure                                 | 2.64                       | 2.23       | 3.11       | 13mmHg                                    | 22mmHg                                    | <1 x10 <sup>-7</sup>  | 618 |
| Systolic pulmonary artery pressure                                  | 2.60                       | 2.21       | 3.06       | 32mmHg                                    | 48mmHg                                    | <1 x10 <sup>-7</sup>  | 617 |
| Systolic right ventricular pressure                                 | 2.29                       | 1.97       | 2.66       | 33mmHg                                    | 45mmHg                                    | <1 x10 <sup>-7</sup>  | 692 |
| Diastolic right ventricular pressure                                | 1.95                       | 1.67       | 2.27       | 6.8mmHg                                   | 10.1mmHg                                  | <1 x10 <sup>-7</sup>  | 691 |
| Pulmonary artery proportional pulse pressure                        | 2.19                       | 1.86       | 2.57       | 19mmHg                                    | 27mmHg                                    | <1 x10 <sup>-7</sup>  | 617 |
| Pulmonary vascular resistance                                       | 2.47                       | 2.11       | 2.89       | 1.9Woods                                  | 2.7Woods                                  | <1 x10 <sup>-7</sup>  | 638 |
| Transpulmonary gradient                                             | 2.42                       | 2.04       | 2.87       | 10mmHg                                    | 17mmHg                                    | <1 x10 <sup>-7</sup>  | 568 |
| Right ventricular stroke volume                                     | 0.38                       | 0.31       | 0.47       | 77ml                                      | 57ml                                      | <1 x10 <sup>-7</sup>  | 343 |
| Right atrial pressure                                               | 1.87                       | 1.61       | 2.18       | 4.6mmHg                                   | 7.3mmHg                                   | <1 x10 <sup>-7</sup>  | 658 |
| Diastolic pressure gradient                                         | 1.99                       | 1.68       | 2.36       | 1.9mmHg                                   | 6mmHg                                     | <1 x10 <sup>-7</sup>  | 568 |
| Cardiac index by thermodilution                                     | 0.60                       | 0.51       | 0.70       | 2.7 L/min/m <sup>2</sup>                  | 2.4 L/min/m <sup>2</sup>                  | <1 x10 <sup>-7</sup>  | 562 |
| Aortic oxygen saturation                                            | 0.59                       | 0.49       | 0.70       | 97.4%                                     | 95.9%                                     | <1 x10 <sup>-7</sup>  | 514 |
| Mean pulmonary wedge pressure                                       | 1.54                       | 1.32       | 1.79       | 8.7mmH                                    | 11.8mmHg                                  | <1 x10 <sup>-7</sup>  | 633 |
| Systemic vascular resistance (Woods units)                          | 1.54                       | 1.31       | 1.82       | 8.7Woods                                  | 11.8Woods                                 | 1.4 x10 <sup>-7</sup> | 557 |
| Central venous pressure to pulmonary capillary wedge pressure ratio | 1.38                       | 1.17       | 1.61       | 0.54                                      | 0.64                                      | 8.6 x10 <sup>-5</sup> | 595 |
| Diastolic blood pressure                                            | 1.24                       | 1.07       | 1.43       | 71mmHg                                    | 73mmHg                                    | 0.0047                | 637 |
| Mean arterial pressure                                              | 1.04                       | 0.90       | 1.21       | 93mmHg                                    | 94mmHg                                    | 0.57                  | 633 |
| Resistance-compliance product                                       | 1.05                       | 0.86       | 1.30       | 0.49                                      | 0.51                                      | 0.62                  | 270 |
| Systolic blood pressure                                             | 0.97                       | 0.84       | 1.13       | 129mmHh                                   | 128mmHg                                   | 0.73                  | 647 |

P value threshold after Bonferroni correction: 0.002
